# Supplementary material for: A comprehensive understanding of carbon–carbon bond formation by alkyne migratory insertion into manganacycles
Source: Royal Society of Chemistry journal article supplement (doi:10.1039/d2sc02562k), 2022-01-01
Supplement: d2sc02562k1.pdf [file d2sc02562k1.pdf]

Calculated coordinates, energies and vibrational frequencies for the computational chemistry in:

**A comprehensive understanding of carbon-carbon bond formation through alkyne migratory insertion into manganacycles.**

L. Anders Hammarback,<sup>[a]</sup> Jonathan B. Eastwood,<sup>[a]</sup> Thomas J. Burden,<sup>[a]</sup> Callum J. Pearce,<sup>[a]</sup> Ian P. Clark,<sup>[b]</sup> Michael Towrie,<sup>[b]</sup> Alan Robinson,<sup>[c]</sup> Ian J. S. Fairlamb\*<sup>[a]</sup> and Jason M. Lynam\*<sup>[a]</sup>

[a] Department of Chemistry, University of York, Heslington, York, YO10 5DD, UK [ian.fairlamb@york.ac.uk](mailto:ian.fairlamb@york.ac.uk), [jason.lynam@york.ac.uk](mailto:jason.lynam@york.ac.uk)

[b] Central Laser Facility, STFC Rutherford Appleton Laboratory, Harwell Science and Innovation Campus, Didcot, Oxfordshire, OX11 0QX, UK.

[c] Syngenta Crop Protection AG, Münchwilen, Breitenloh 5, 433, Switzerland.

**2aa**

SCF Energy (au) BP86/SV(P) -2427.867667755  
 SCF Energy (au) PBE0/def2-TZVPP -2427.429781153  
 SCF Energy (au) PBE0/def2-TZVPP -2427.4405898830 (Toluene Correction)  
 Zero Point Energy (au) 0.2962891  
 Chemical Potential (kJ mol<sup>-1</sup>) 622.29  
 Dispersion Correction (au) PBE0/def2-TZVPP -0.06324694

xyz coordinates

43

|    |            |            |            |
|----|------------|------------|------------|
| Mn | 1.4645116  | 0.2343712  | 0.5909323  |
| C  | 1.7816619  | 0.4425193  | 2.3507023  |
| C  | 3.1502517  | -0.3752202 | 0.3332030  |
| C  | 1.9986404  | 1.9297007  | 0.2215559  |
| O  | 2.3604200  | 3.0246807  | 0.0388304  |
| O  | 4.2519496  | -0.6744970 | 0.1185508  |
| O  | 1.9860597  | 0.5565279  | 3.4908732  |
| C  | -1.3688135 | -0.1875101 | 1.3527343  |
| C  | -1.0731050 | 1.9759850  | 0.4993644  |
| C  | -2.4254157 | 2.2929513  | 0.6800968  |
| C  | -3.2774363 | 1.3187041  | 1.2262739  |
| C  | -2.7416292 | 0.0711722  | 1.5626743  |
| C  | -0.6964351 | -1.4521885 | 1.6603519  |
| C  | 0.6639318  | -1.4851738 | 1.3612258  |
| C  | 1.4083399  | -2.7154182 | 1.6139593  |
| O  | 0.6707753  | -3.7894906 | 2.2061021  |
| C  | -0.6513101 | -3.7241982 | 2.4956329  |
| C  | -1.3727373 | -2.5906643 | 2.2321973  |
| H  | -0.3769659 | 2.7177069  | 0.0793093  |
| H  | -2.7928098 | 3.2910274  | 0.3962989  |
| H  | -4.3469456 | 1.5296005  | 1.3888023  |
| H  | -3.3841721 | -0.7119417 | 1.9907119  |
| O  | 2.5769801  | -2.9477696 | 1.3720105  |
| C  | -1.1727391 | -4.9896275 | 3.1068736  |
| H  | -2.4446006 | -2.5726096 | 2.4751610  |
| N  | -0.5455730 | 0.7755408  | 0.8231995  |
| C  | 0.8586201  | 1.2727425  | -2.6141879 |
| C  | 1.9732273  | 2.0182441  | -3.0776447 |
| C  | 1.8089943  | 2.9990900  | -4.0649810 |
| C  | 0.5359603  | 3.2632459  | -4.6022414 |
| C  | -0.5765511 | 2.5332325  | -4.1481913 |
| C  | -0.4219365 | 1.5470344  | -3.1628167 |
| H  | 2.9715633  | 1.8130324  | -2.6613145 |
| H  | 2.6864145  | 3.5651591  | -4.4186222 |
| H  | 0.4115198  | 4.0380631  | -5.3765206 |
| H  | -1.5768983 | 2.7310968  | -4.5679957 |
| H  | -1.2907383 | 0.9686119  | -2.8108704 |
| C  | 1.0036831  | 0.2255046  | -1.6318907 |
| C  | 0.9714273  | -0.9282526 | -1.1151016 |
| H  | 0.8955204  | -2.0110916 | -1.2178750 |
| H  | -1.0093753 | -5.8521617 | 2.4222750  |
| H  | -2.2559519 | -4.9078343 | 3.3298297  |
| H  | -0.6283127 | -5.2198957 | 4.0505213  |

\$vibrational spectrum

| # | mode | symmetry | wave number | IR intensity | selection rules |
|---|------|----------|-------------|--------------|-----------------|
| # |      |          | cm** (-1)   | km/mol       | IR RAMAN        |
|   | 1    |          | 0.00        | 0.00000      | - -             |
|   | 2    |          | 0.00        | 0.00000      | - -             |
|   | 3    |          | 0.00        | 0.00000      | - -             |
|   | 4    |          | 0.00        | 0.00000      | - -             |
|   | 5    |          | 0.00        | 0.00000      | - -             |

|    |   |        |          |     |     |
|----|---|--------|----------|-----|-----|
| 6  |   | 0.00   | 0.00000  | -   | -   |
| 7  | a | 12.83  | 0.33682  | YES | YES |
| 8  | a | 28.85  | 0.53951  | YES | YES |
| 9  | a | 32.31  | 0.18001  | YES | YES |
| 10 | a | 37.53  | 1.95531  | YES | YES |
| 11 | a | 60.15  | 0.05712  | YES | YES |
| 12 | a | 69.85  | 0.11556  | YES | YES |
| 13 | a | 75.55  | 0.07607  | YES | YES |
| 14 | a | 81.69  | 0.39008  | YES | YES |
| 15 | a | 91.73  | 1.64917  | YES | YES |
| 16 | a | 99.05  | 0.97666  | YES | YES |
| 17 | a | 109.88 | 0.12991  | YES | YES |
| 18 | a | 119.87 | 0.10005  | YES | YES |
| 19 | a | 123.49 | 1.49253  | YES | YES |
| 20 | a | 137.69 | 0.14153  | YES | YES |
| 21 | a | 148.69 | 1.92865  | YES | YES |
| 22 | a | 153.79 | 1.84421  | YES | YES |
| 23 | a | 159.65 | 1.34880  | YES | YES |
| 24 | a | 163.44 | 2.66553  | YES | YES |
| 25 | a | 192.46 | 1.04417  | YES | YES |
| 26 | a | 219.28 | 0.63073  | YES | YES |
| 27 | a | 249.36 | 0.36492  | YES | YES |
| 28 | a | 257.61 | 1.89803  | YES | YES |
| 29 | a | 294.76 | 2.37808  | YES | YES |
| 30 | a | 302.79 | 4.27708  | YES | YES |
| 31 | a | 322.17 | 10.76010 | YES | YES |
| 32 | a | 330.22 | 13.32318 | YES | YES |
| 33 | a | 398.32 | 4.09474  | YES | YES |
| 34 | a | 401.54 | 0.07874  | YES | YES |
| 35 | a | 414.56 | 12.49803 | YES | YES |
| 36 | a | 428.96 | 1.22830  | YES | YES |
| 37 | a | 455.65 | 0.76864  | YES | YES |
| 38 | a | 457.06 | 9.03126  | YES | YES |
| 39 | a | 467.19 | 5.31735  | YES | YES |
| 40 | a | 479.14 | 10.45341 | YES | YES |
| 41 | a | 486.43 | 4.00283  | YES | YES |
| 42 | a | 493.29 | 15.20698 | YES | YES |
| 43 | a | 500.80 | 11.90031 | YES | YES |
| 44 | a | 521.26 | 39.87505 | YES | YES |
| 45 | a | 532.31 | 6.17382  | YES | YES |
| 46 | a | 537.42 | 1.03599  | YES | YES |
| 47 | a | 544.56 | 5.83322  | YES | YES |
| 48 | a | 561.68 | 1.89963  | YES | YES |
| 49 | a | 581.56 | 3.53684  | YES | YES |
| 50 | a | 590.09 | 1.38142  | YES | YES |

**2aa'**

SCF Energy (au) BP86/SV(P) -2427.867511092  
SCF Energy (au) PBE0/def2-TZVPP -2427.429306722  
SCF Energy (au) PBE0/def2-TZVPP -2427.4398029146 (Toluene Correction)  
Zero Point Energy (au) 0.2965857  
Chemical Potential (kJ mol<sup>-1</sup>) 627.02  
Dispersion Correction (au) PBE0/def2-TZVPP -0.06502154

xyz coordinates

43

|    |            |            |            |
|----|------------|------------|------------|
| Mn | 1.5147523  | 1.8031815  | 0.1393490  |
| C  | 1.7127939  | 2.1387468  | 1.9018085  |
| C  | 3.2493306  | 1.2886291  | -0.0008400 |
| C  | 1.9281023  | 3.5153518  | -0.2748048 |
| O  | 2.1937308  | 4.6255178  | -0.5219659 |
| O  | 4.3733880  | 1.0453489  | -0.1588772 |
| O  | 1.8492529  | 2.3558813  | 3.0367268  |
| C  | -1.3079859 | 1.1705764  | 0.7982681  |
| C  | -1.1705494 | 3.2587826  | -0.2561876 |
| C  | -2.5571983 | 3.4451580  | -0.1964264 |
| C  | -3.3444393 | 2.4413384  | 0.3921436  |
| C  | -2.7119508 | 1.2979551  | 0.8908193  |
| C  | -0.5340596 | 0.0226442  | 1.2788665  |
| C  | 0.8392402  | 0.0971972  | 1.0533379  |
| C  | 1.6869353  | -0.9837612 | 1.5445888  |
| O  | 1.0171909  | -2.0733219 | 2.1814486  |
| C  | -0.3230854 | -2.1275936 | 2.3677577  |
| C  | -1.1327676 | -1.1103397 | 1.9381859  |
| H  | -0.5218856 | 4.0264367  | -0.7056722 |
| H  | -3.0024165 | 4.3659229  | -0.6039621 |
| H  | -4.4391991 | 2.5486993  | 0.4604218  |
| H  | -3.3026868 | 0.4929847  | 1.3514589  |
| O  | 2.8988123  | -1.0795146 | 1.4755477  |
| C  | -0.7602480 | -3.3773999 | 3.0697511  |
| H  | -2.2161667 | -1.1829428 | 2.1088455  |
| N  | -0.5509876 | 2.1614445  | 0.2266401  |
| H  | 1.5437899  | 2.6770580  | -2.7278962 |
| C  | 1.3490132  | 1.8945099  | -1.9927118 |
| C  | 1.1035637  | 0.6840225  | -1.6983683 |
| C  | 0.7228759  | -0.6759224 | -2.0148629 |
| H  | -0.4580107 | -4.2776405 | 2.4886854  |
| H  | -1.8604484 | -3.3925945 | 3.2075539  |
| H  | -0.2712121 | -3.4569603 | 4.0667827  |
| C  | -0.0173112 | -3.3078536 | -2.7473764 |
| C  | -0.8258252 | -2.2191517 | -3.1181057 |
| C  | -0.4617625 | -0.9130270 | -2.7582148 |
| C  | 1.5263381  | -1.7809469 | -1.6370200 |
| C  | 1.1589866  | -3.0817693 | -2.0096625 |
| H  | -0.3036529 | -4.3333910 | -3.0337641 |
| H  | -1.7490587 | -2.3869893 | -3.6976299 |
| H  | -1.0910542 | -0.0579195 | -3.0525480 |
| H  | 2.4456298  | -1.6090748 | -1.0558656 |
| H  | 1.8002357  | -3.9292733 | -1.7162254 |

\$vibrational spectrum

| # | mode | symmetry | wave number<br>cm** (-1) | IR intensity<br>km/mol | selection rules<br>IR RAMAN |
|---|------|----------|--------------------------|------------------------|-----------------------------|
| # |      |          |                          |                        |                             |
|   | 1    |          | 0.00                     | 0.00000                | - -                         |
|   | 2    |          | 0.00                     | 0.00000                | - -                         |
|   | 3    |          | 0.00                     | 0.00000                | - -                         |
|   | 4    |          | 0.00                     | 0.00000                | - -                         |
|   | 5    |          | 0.00                     | 0.00000                | - -                         |

|    |   |        |          |     |     |
|----|---|--------|----------|-----|-----|
| 6  |   | 0.00   | 0.00000  | -   | -   |
| 7  | a | 24.31  | 0.19772  | YES | YES |
| 8  | a | 26.79  | 0.77570  | YES | YES |
| 9  | a | 44.61  | 0.64194  | YES | YES |
| 10 | a | 50.58  | 0.51026  | YES | YES |
| 11 | a | 66.00  | 0.33144  | YES | YES |
| 12 | a | 72.98  | 0.69452  | YES | YES |
| 13 | a | 77.43  | 0.43971  | YES | YES |
| 14 | a | 83.41  | 0.66789  | YES | YES |
| 15 | a | 95.16  | 0.95452  | YES | YES |
| 16 | a | 100.70 | 0.38104  | YES | YES |
| 17 | a | 106.25 | 0.32277  | YES | YES |
| 18 | a | 124.35 | 0.25320  | YES | YES |
| 19 | a | 127.92 | 0.85768  | YES | YES |
| 20 | a | 138.50 | 0.05127  | YES | YES |
| 21 | a | 150.94 | 0.32827  | YES | YES |
| 22 | a | 158.78 | 1.28351  | YES | YES |
| 23 | a | 166.59 | 0.35274  | YES | YES |
| 24 | a | 180.24 | 1.66707  | YES | YES |
| 25 | a | 188.29 | 2.27493  | YES | YES |
| 26 | a | 212.55 | 0.37909  | YES | YES |
| 27 | a | 247.14 | 0.72321  | YES | YES |
| 28 | a | 260.96 | 0.15337  | YES | YES |
| 29 | a | 294.50 | 3.08395  | YES | YES |
| 30 | a | 308.25 | 8.36217  | YES | YES |
| 31 | a | 326.79 | 2.69630  | YES | YES |
| 32 | a | 337.65 | 8.35710  | YES | YES |
| 33 | a | 398.14 | 3.36635  | YES | YES |
| 34 | a | 403.18 | 2.34038  | YES | YES |
| 35 | a | 408.53 | 10.62109 | YES | YES |
| 36 | a | 428.45 | 10.50586 | YES | YES |
| 37 | a | 457.68 | 0.58035  | YES | YES |
| 38 | a | 460.91 | 0.98099  | YES | YES |
| 39 | a | 468.88 | 4.53489  | YES | YES |
| 40 | a | 479.50 | 3.90853  | YES | YES |
| 41 | a | 484.74 | 7.08867  | YES | YES |
| 42 | a | 493.18 | 4.58799  | YES | YES |
| 43 | a | 506.36 | 23.83062 | YES | YES |
| 44 | a | 525.23 | 14.38684 | YES | YES |
| 45 | a | 535.01 | 3.26780  | YES | YES |
| 46 | a | 541.18 | 0.57910  | YES | YES |
| 47 | a | 559.77 | 3.82363  | YES | YES |
| 48 | a | 564.37 | 1.56700  | YES | YES |
| 49 | a | 583.10 | 1.77315  | YES | YES |
| 50 | a | 593.14 | 1.93748  | YES | YES |

**2ba**

SCF Energy (au)BP86/SV(P) -2277.516190056  
 SCF Energy (au)PBE0/def2-TZVPP -2277.070640511  
 SCF Energy (au)PBE0/def2-TZVPP -2277.0778650907 (Toluene Correction)  
 Zero Point Energy (au) 0.2897773  
 Chemical Potential (kJ mol<sup>-1</sup>) 615.66  
 Dispersion Correction (au) PBE0/def2-TZVPP -0.06110662

xyz coordinates

41

|    |            |            |            |
|----|------------|------------|------------|
| Mn | 1.3218603  | 0.2161020  | 0.6121444  |
| C  | 1.7788652  | 0.6991612  | 2.2861199  |
| C  | 3.0068573  | -0.2730204 | 0.2487755  |
| C  | 1.5913757  | 1.8997864  | -0.0160227 |
| O  | 1.8059907  | 2.9928522  | -0.3644069 |
| O  | 4.1007668  | -0.6058230 | 0.0151684  |
| O  | 2.0820196  | 1.0031429  | 3.3682155  |
| C  | -1.3180498 | -0.4492854 | 1.7886866  |
| C  | -1.4278286 | 1.5987142  | 0.6433287  |
| C  | -2.7843206 | 1.7644718  | 0.9428058  |
| C  | -3.4261769 | 0.7711469  | 1.7027561  |
| C  | -2.6879074 | -0.3376577 | 2.1237114  |
| C  | -0.4446517 | -1.5624103 | 2.1751019  |
| C  | 0.9072958  | -1.4767290 | 1.7297269  |
| C  | 1.7860999  | -2.5181232 | 2.0955425  |
| C  | 1.3438020  | -3.6150948 | 2.8558307  |
| C  | 0.0029626  | -3.6950653 | 3.2795373  |
| C  | -0.8868254 | -2.6697164 | 2.9404323  |
| H  | -0.8883399 | 2.3555919  | 0.0531607  |
| H  | -3.3179336 | 2.6588013  | 0.5861152  |
| H  | -4.4929401 | 0.8621691  | 1.9652861  |
| H  | -3.1679721 | -1.1282940 | 2.7185786  |
| H  | 2.8433831  | -2.4844404 | 1.7833064  |
| H  | 2.0545812  | -4.4155643 | 3.1237603  |
| H  | -0.3442870 | -4.5537096 | 3.8769362  |
| H  | -1.9343081 | -2.7352412 | 3.2784777  |
| N  | -0.7068340 | 0.5308017  | 1.0490580  |
| C  | 0.4186177  | 0.7604854  | -2.6526220 |
| C  | 1.4639894  | 1.4883082  | -3.2758567 |
| C  | 1.2035674  | 2.2810818  | -4.4019640 |
| C  | -0.1001745 | 2.3746674  | -4.9216796 |
| C  | -1.1459588 | 1.6622080  | -4.3088994 |
| C  | -0.8936096 | 0.8615517  | -3.1851924 |
| H  | 2.4862082  | 1.4183505  | -2.8726273 |
| H  | 2.0294261  | 2.8347075  | -4.8783822 |
| H  | -0.3004026 | 3.0034950  | -5.8047658 |
| H  | -2.1704367 | 1.7271619  | -4.7118877 |
| H  | -1.7103084 | 0.2966645  | -2.7081434 |
| C  | 0.6611091  | -0.1065099 | -1.5221846 |
| C  | 0.6813710  | -1.1757627 | -0.8449443 |
| H  | 0.5791166  | -2.2589761 | -0.7729843 |

\$vibrational spectrum

| # | mode | symmetry | wave number<br>cm** (-1) | IR intensity<br>km/mol | selection rules<br>IR | RAMAN |
|---|------|----------|--------------------------|------------------------|-----------------------|-------|
| # |      |          |                          |                        |                       |       |
| 1 |      |          | 0.00                     | 0.00000                | -                     | -     |
| 2 |      |          | 0.00                     | 0.00000                | -                     | -     |
| 3 |      |          | 0.00                     | 0.00000                | -                     | -     |
| 4 |      |          | 0.00                     | 0.00000                | -                     | -     |
| 5 |      |          | 0.00                     | 0.00000                | -                     | -     |
| 6 |      |          | 0.00                     | 0.00000                | -                     | -     |
| 7 |      | a        | 18.14                    | 0.20009                | YES                   | YES   |

|    |   |        |          |     |     |
|----|---|--------|----------|-----|-----|
| 8  | a | 29.04  | 0.15401  | YES | YES |
| 9  | a | 39.82  | 0.05836  | YES | YES |
| 10 | a | 57.15  | 0.31155  | YES | YES |
| 11 | a | 69.46  | 0.07269  | YES | YES |
| 12 | a | 74.18  | 0.09666  | YES | YES |
| 13 | a | 86.23  | 1.28775  | YES | YES |
| 14 | a | 90.54  | 0.26084  | YES | YES |
| 15 | a | 99.10  | 0.43721  | YES | YES |
| 16 | a | 109.57 | 0.13096  | YES | YES |
| 17 | a | 113.25 | 0.10437  | YES | YES |
| 18 | a | 117.38 | 0.59846  | YES | YES |
| 19 | a | 130.55 | 0.29161  | YES | YES |
| 20 | a | 162.17 | 1.81464  | YES | YES |
| 21 | a | 165.28 | 5.13092  | YES | YES |
| 22 | a | 188.98 | 1.29120  | YES | YES |
| 23 | a | 222.35 | 0.64998  | YES | YES |
| 24 | a | 242.82 | 2.12591  | YES | YES |
| 25 | a | 262.80 | 0.48548  | YES | YES |
| 26 | a | 282.79 | 1.96336  | YES | YES |
| 27 | a | 319.03 | 24.25280 | YES | YES |
| 28 | a | 358.43 | 1.93112  | YES | YES |
| 29 | a | 400.88 | 0.01385  | YES | YES |
| 30 | a | 410.80 | 1.69648  | YES | YES |
| 31 | a | 420.57 | 10.80509 | YES | YES |
| 32 | a | 437.44 | 2.27242  | YES | YES |
| 33 | a | 454.64 | 16.81944 | YES | YES |
| 34 | a | 456.28 | 1.42207  | YES | YES |
| 35 | a | 472.05 | 4.20216  | YES | YES |
| 36 | a | 480.46 | 6.23593  | YES | YES |
| 37 | a | 486.64 | 1.87109  | YES | YES |
| 38 | a | 492.13 | 5.61083  | YES | YES |
| 39 | a | 502.05 | 7.64352  | YES | YES |
| 40 | a | 508.50 | 13.02943 | YES | YES |
| 41 | a | 524.55 | 36.11294 | YES | YES |
| 42 | a | 539.45 | 10.10604 | YES | YES |
| 43 | a | 551.07 | 5.77890  | YES | YES |
| 44 | a | 557.04 | 1.74908  | YES | YES |
| 45 | a | 609.09 | 21.17504 | YES | YES |
| 46 | a | 614.47 | 7.83987  | YES | YES |
| 47 | a | 623.39 | 7.80591  | YES | YES |
| 48 | a | 625.85 | 11.54609 | YES | YES |
| 49 | a | 643.05 | 9.93463  | YES | YES |
| 50 | a | 653.95 | 72.74795 | YES | YES |

**2ba'**

SCF Energy (au) BP86/SV(P) -2277.513915506  
 SCF Energy (au)PBE0/def2-TZVPP -2277.068149867  
 SCF Energy (au) PBE0/def2-TZVPP -2277.0753739100 (Toluene Correction)  
 Zero Point Energy (au) 0.2897742  
 Chemical Potential (kJ mol<sup>-1</sup>) 615.97  
 Dispersion Correction (au) PBE0/def2-TZVPP -0.06339944

xyz coordinates

41

|    |            |            |            |
|----|------------|------------|------------|
| Mn | 1.2258585  | 1.7959458  | 0.2361359  |
| C  | 1.3726238  | 2.2084123  | 1.9870298  |
| C  | 2.9819188  | 1.4607606  | 0.1062994  |
| C  | 1.4143764  | 3.5362389  | -0.2348193 |
| O  | 1.5584791  | 4.6599386  | -0.5184893 |
| O  | 4.1193272  | 1.2134699  | 0.0247307  |
| O  | 1.4762395  | 2.4873278  | 3.1120387  |
| C  | -1.4586829 | 0.7709355  | 0.9713587  |
| C  | -1.6429054 | 2.8509145  | -0.1047515 |
| C  | -3.0388337 | 2.8435896  | -0.0183476 |
| C  | -3.6627762 | 1.7421360  | 0.5941326  |
| C  | -2.8677031 | 0.7049515  | 1.0873249  |
| C  | -0.5234072 | -0.2504435 | 1.4522467  |
| C  | 0.8585732  | 0.0090274  | 1.2153396  |
| C  | 1.7918361  | -0.9298249 | 1.7020787  |
| C  | 1.3783681  | -2.0989935 | 2.3648978  |
| C  | 0.0097808  | -2.3548680 | 2.5709695  |
| C  | -0.9371225 | -1.4300543 | 2.1171572  |
| H  | -1.1144621 | 3.6948098  | -0.5748638 |
| H  | -3.6178365 | 3.6883408  | -0.4221460 |
| H  | -4.7602400 | 1.6941301  | 0.6854248  |
| H  | -3.3329288 | -0.1690477 | 1.5661469  |
| H  | 2.8730423  | -0.7571295 | 1.5689616  |
| H  | 2.1337988  | -2.8169591 | 2.7274855  |
| H  | -0.3163077 | -3.2707270 | 3.0901531  |
| H  | -2.0076893 | -1.6308725 | 2.2885396  |
| N  | -0.8676015 | 1.8541483  | 0.3737200  |
| H  | 1.0761801  | 2.5805694  | -2.6558619 |
| C  | 0.9964970  | 1.8046790  | -1.8925299 |
| C  | 0.8866792  | 0.5828388  | -1.5683411 |
| C  | 0.6452584  | -0.8197349 | -1.8227326 |
| C  | 0.1610902  | -3.5448254 | -2.4166148 |
| C  | 1.4167314  | -3.1382082 | -1.9305350 |
| C  | 1.6585020  | -1.7912392 | -1.6274982 |
| C  | -0.6176938 | -1.2392218 | -2.3130126 |
| C  | -0.8537739 | -2.5906422 | -2.6051716 |
| H  | -0.0258660 | -4.6064105 | -2.6487203 |
| H  | 2.2185010  | -3.8805090 | -1.7827013 |
| H  | 2.6422624  | -1.4735862 | -1.2495178 |
| H  | -1.4095959 | -0.4891813 | -2.4676116 |
| H  | -1.8404977 | -2.9006858 | -2.9879057 |

\$vibrational spectrum

| # | mode | symmetry | wave number | IR intensity | selection rules |       |
|---|------|----------|-------------|--------------|-----------------|-------|
| # |      |          | cm** (-1)   | km/mol       | IR              | RAMAN |
|   | 1    |          | 0.00        | 0.00000      | -               | -     |
|   | 2    |          | 0.00        | 0.00000      | -               | -     |
|   | 3    |          | 0.00        | 0.00000      | -               | -     |
|   | 4    |          | 0.00        | 0.00000      | -               | -     |
|   | 5    |          | 0.00        | 0.00000      | -               | -     |
|   | 6    |          | 0.00        | 0.00000      | -               | -     |
|   | 7    | a        | 17.53       | 0.21377      | YES             | YES   |



|    |   |        |          |     |     |
|----|---|--------|----------|-----|-----|
| 8  | a | 27.79  | 0.28921  | YES | YES |
| 9  | a | 45.99  | 0.13612  | YES | YES |
| 10 | a | 51.80  | 0.05357  | YES | YES |
| 11 | a | 64.59  | 0.06234  | YES | YES |
| 12 | a | 74.37  | 0.68844  | YES | YES |
| 13 | a | 87.29  | 0.50886  | YES | YES |
| 14 | a | 95.39  | 0.82393  | YES | YES |
| 15 | a | 97.32  | 0.37309  | YES | YES |
| 16 | a | 105.55 | 0.26004  | YES | YES |
| 17 | a | 113.04 | 0.17732  | YES | YES |
| 18 | a | 118.41 | 0.31008  | YES | YES |
| 19 | a | 133.64 | 0.12211  | YES | YES |
| 20 | a | 171.70 | 2.18610  | YES | YES |
| 21 | a | 174.78 | 1.43021  | YES | YES |
| 22 | a | 190.88 | 0.74865  | YES | YES |
| 23 | a | 218.04 | 0.51180  | YES | YES |
| 24 | a | 233.98 | 1.36411  | YES | YES |
| 25 | a | 264.26 | 0.52714  | YES | YES |
| 26 | a | 284.82 | 0.40484  | YES | YES |
| 27 | a | 325.68 | 12.47841 | YES | YES |
| 28 | a | 358.71 | 2.00023  | YES | YES |
| 29 | a | 399.66 | 1.03863  | YES | YES |
| 30 | a | 405.23 | 14.09467 | YES | YES |
| 31 | a | 418.07 | 2.17454  | YES | YES |
| 32 | a | 435.09 | 3.43305  | YES | YES |
| 33 | a | 457.07 | 1.70795  | YES | YES |
| 34 | a | 461.68 | 1.61109  | YES | YES |
| 35 | a | 469.82 | 4.73183  | YES | YES |
| 36 | a | 483.44 | 7.46993  | YES | YES |
| 37 | a | 488.14 | 0.26797  | YES | YES |
| 38 | a | 493.44 | 2.16853  | YES | YES |
| 39 | a | 502.03 | 3.50546  | YES | YES |
| 40 | a | 504.26 | 20.34088 | YES | YES |
| 41 | a | 528.28 | 12.34652 | YES | YES |
| 42 | a | 537.56 | 7.68174  | YES | YES |
| 43 | a | 556.97 | 2.32393  | YES | YES |
| 44 | a | 567.16 | 3.05453  | YES | YES |
| 45 | a | 612.23 | 15.52465 | YES | YES |
| 46 | a | 614.71 | 25.81800 | YES | YES |
| 47 | a | 623.17 | 8.97027  | YES | YES |
| 48 | a | 626.79 | 23.25932 | YES | YES |
| 49 | a | 642.59 | 20.75191 | YES | YES |
| 50 | a | 649.69 | 29.46792 | YES | YES |

**2bb**

|                                            |                                       |
|--------------------------------------------|---------------------------------------|
| SCF Energy (au) BP86/SV(P)                 | -2505.237954427                       |
| SCF Energy (au) PBE0/def2-TZVPP            | -2504.790885075                       |
| SCF Energy (au) PBE0/def2-TZVPP            | -2504.7995679455 (Toluene Correction) |
| Zero Point Energy (au)                     | 0.3320389                             |
| Chemical Potential (kJ mol <sup>-1</sup> ) | 708.87                                |
| Dispersion Correction (au) PBE0/def2-TZVPP | -0.06626996                           |

xyz coordinates

47

|    |            |            |            |
|----|------------|------------|------------|
| Mn | 1.6180000  | 0.5959888  | 1.9890749  |
| C  | 1.6037650  | 1.0178592  | 3.7432338  |
| C  | 3.3429124  | 0.1140385  | 2.0743823  |
| C  | 2.0168363  | 2.3041750  | 1.5309996  |
| O  | 2.2898686  | 3.4104105  | 1.2738312  |
| O  | 4.4599601  | -0.2173966 | 2.1300973  |
| O  | 1.6041205  | 1.2900572  | 4.8745535  |
| C  | -1.2314929 | -0.1224433 | 2.4276854  |
| C  | -1.0754915 | 1.9328046  | 1.3034667  |
| C  | -2.4658745 | 2.0706299  | 1.2336300  |
| C  | -3.2650505 | 1.0631172  | 1.7984665  |
| C  | -2.6424082 | -0.0364777 | 2.3952798  |
| C  | -0.4700380 | -1.2378566 | 3.0025114  |
| C  | 0.9489658  | -1.1392561 | 2.9070916  |
| C  | 1.7198929  | -2.1869073 | 3.4518553  |
| C  | 1.1128659  | -3.3042942 | 4.0519685  |
| C  | -0.2897640 | -3.3964114 | 4.1319232  |
| C  | -1.0772339 | -2.3642047 | 3.6093205  |
| H  | -0.4188630 | 2.7004377  | 0.8690315  |
| H  | -2.9019077 | 2.9514510  | 0.7386382  |
| H  | -4.3648766 | 1.1315375  | 1.7692289  |
| H  | -3.2468539 | -0.8421105 | 2.8369312  |
| H  | 2.8210083  | -2.1434225 | 3.4119037  |
| H  | 1.7424419  | -4.1107013 | 4.4656753  |
| H  | -0.7662818 | -4.2702563 | 4.6055253  |
| H  | -2.1750040 | -2.4390751 | 3.6791968  |
| N  | -0.4669697 | 0.8778050  | 1.8856129  |
| C  | 1.9148815  | 1.3242364  | -1.3107508 |
| C  | 1.6162769  | 0.4110700  | -0.1848834 |
| C  | 1.3516612  | -0.7098415 | 0.3370742  |
| H  | 1.1006053  | -1.7696478 | 0.3104107  |
| H  | 3.0138820  | 1.3998505  | -1.4583892 |
| O  | 1.4025969  | 0.8166996  | -2.5617656 |
| H  | 1.5066926  | 2.3409297  | -1.1390848 |
| C  | 0.1106493  | 1.1518490  | -2.8526820 |
| O  | -0.5779918 | 1.8559542  | -2.1311994 |
| C  | -0.3415613 | 0.5661932  | -4.1515026 |
| C  | -1.2980410 | -0.4808569 | -6.5823375 |
| C  | -2.1297592 | 0.3353950  | -5.7937381 |
| C  | -1.6539717 | 0.8572538  | -4.5829244 |
| C  | 0.4903588  | -0.2538503 | -4.9450346 |
| C  | 0.0102220  | -0.7740441 | -6.1565301 |
| H  | -1.6719762 | -0.8915143 | -7.5350248 |
| H  | -3.1552568 | 0.5653103  | -6.1266224 |
| H  | -2.2846628 | 1.4989506  | -3.9479393 |
| H  | 1.5114632  | -0.4793423 | -4.6037506 |
| H  | 0.6614034  | -1.4140937 | -6.7744408 |

\$vibrational spectrum

| #  | mode | symmetry | wave number<br>cm**(-1) | IR intensity<br>km/mol | selection rules |       |
|----|------|----------|-------------------------|------------------------|-----------------|-------|
| #  |      |          |                         |                        | IR              | RAMAN |
| 1  |      |          | 0.00                    | 0.00000                | -               | -     |
| 2  |      |          | 0.00                    | 0.00000                | -               | -     |
| 3  |      |          | 0.00                    | 0.00000                | -               | -     |
| 4  |      |          | 0.00                    | 0.00000                | -               | -     |
| 5  |      |          | 0.00                    | 0.00000                | -               | -     |
| 6  |      |          | 0.00                    | 0.00000                | -               | -     |
| 7  |      | a        | 13.78                   | 0.63109                | YES             | YES   |
| 8  |      | a        | 16.17                   | 0.06385                | YES             | YES   |
| 9  |      | a        | 26.51                   | 0.94380                | YES             | YES   |
| 10 |      | a        | 40.83                   | 0.11857                | YES             | YES   |
| 11 |      | a        | 44.50                   | 0.14099                | YES             | YES   |
| 12 |      | a        | 60.04                   | 0.64516                | YES             | YES   |
| 13 |      | a        | 69.03                   | 0.21975                | YES             | YES   |
| 14 |      | a        | 72.21                   | 0.85703                | YES             | YES   |
| 15 |      | a        | 84.34                   | 1.45753                | YES             | YES   |
| 16 |      | a        | 90.90                   | 0.52749                | YES             | YES   |
| 17 |      | a        | 96.39                   | 0.34389                | YES             | YES   |
| 18 |      | a        | 97.44                   | 0.34176                | YES             | YES   |
| 19 |      | a        | 108.60                  | 0.17659                | YES             | YES   |
| 20 |      | a        | 112.21                  | 0.23145                | YES             | YES   |
| 21 |      | a        | 134.87                  | 0.21442                | YES             | YES   |
| 22 |      | a        | 147.43                  | 0.82215                | YES             | YES   |
| 23 |      | a        | 158.85                  | 0.08209                | YES             | YES   |
| 24 |      | a        | 184.11                  | 0.56099                | YES             | YES   |
| 25 |      | a        | 192.44                  | 2.38537                | YES             | YES   |
| 26 |      | a        | 210.96                  | 1.77207                | YES             | YES   |
| 27 |      | a        | 233.43                  | 1.65430                | YES             | YES   |
| 28 |      | a        | 247.96                  | 0.63882                | YES             | YES   |
| 29 |      | a        | 261.35                  | 0.30126                | YES             | YES   |
| 30 |      | a        | 284.47                  | 0.09530                | YES             | YES   |
| 31 |      | a        | 304.39                  | 0.64005                | YES             | YES   |
| 32 |      | a        | 335.44                  | 25.56220               | YES             | YES   |
| 33 |      | a        | 352.01                  | 10.82510               | YES             | YES   |
| 34 |      | a        | 358.09                  | 2.98049                | YES             | YES   |
| 35 |      | a        | 403.84                  | 0.00135                | YES             | YES   |
| 36 |      | a        | 404.89                  | 3.35779                | YES             | YES   |
| 37 |      | a        | 418.21                  | 9.17855                | YES             | YES   |
| 38 |      | a        | 437.11                  | 1.26946                | YES             | YES   |
| 39 |      | a        | 443.49                  | 0.54007                | YES             | YES   |
| 40 |      | a        | 456.37                  | 13.63186               | YES             | YES   |
| 41 |      | a        | 456.91                  | 1.18641                | YES             | YES   |
| 42 |      | a        | 470.12                  | 3.60864                | YES             | YES   |
| 43 |      | a        | 474.64                  | 4.67313                | YES             | YES   |
| 44 |      | a        | 485.86                  | 2.37910                | YES             | YES   |
| 45 |      | a        | 492.24                  | 4.47263                | YES             | YES   |
| 46 |      | a        | 503.55                  | 2.17480                | YES             | YES   |
| 47 |      | a        | 534.83                  | 27.57216               | YES             | YES   |
| 48 |      | a        | 551.35                  | 6.93128                | YES             | YES   |
| 49 |      | a        | 555.83                  | 2.85141                | YES             | YES   |
| 50 |      | a        | 586.75                  | 24.75587               | YES             | YES   |

**2bb'**

|                                            |                                       |
|--------------------------------------------|---------------------------------------|
| SCF Energy (au) BP86/SV(P)                 | -2505.236933617                       |
| SCF Energy (au) PBE0/def2-TZVPP            | -2504.790820918                       |
| SCF Energy (au) PBE0/def2-TZVPP            | -2504.8004063460 (Toluene Correction) |
| Zero Point Energy (au)                     | 0.3315667                             |
| Chemical Potential (kJ mol <sup>-1</sup> ) | 706.66                                |
| Dispersion Correction (au) PBE0/def2-TZVPP | -0.06608119                           |

xyz coordinates

47

|    |            |            |            |
|----|------------|------------|------------|
| Mn | 1.2071453  | 2.0845764  | 1.5175484  |
| C  | 1.5188067  | 2.4327129  | 3.2632450  |
| C  | 2.9535568  | 1.8067143  | 1.2210547  |
| C  | 1.3109007  | 3.8417076  | 1.0832671  |
| O  | 1.3966017  | 4.9769109  | 0.8238098  |
| O  | 4.0859643  | 1.6046888  | 1.0311148  |
| O  | 1.7333257  | 2.6615735  | 4.3833466  |
| C  | -1.3840104 | 1.0164804  | 2.5067439  |
| C  | -1.6943190 | 3.1234148  | 1.5175162  |
| C  | -3.0701762 | 3.1092395  | 1.7689236  |
| C  | -3.6164244 | 1.9914272  | 2.4235040  |
| C  | -2.7682459 | 0.9435312  | 2.7903655  |
| C  | -0.4006485 | -0.0225468 | 2.8330711  |
| C  | 0.9456160  | 0.2488490  | 2.4458893  |
| C  | 1.9236663  | -0.7190291 | 2.7573426  |
| C  | 1.5843701  | -1.9224081 | 3.4016184  |
| C  | 0.2501914  | -2.1840534 | 3.7654303  |
| C  | -0.7378730 | -1.2338403 | 3.4845280  |
| H  | -1.2264610 | 3.9816417  | 1.0106712  |
| H  | -3.6935940 | 3.9614037  | 1.4575101  |
| H  | -4.6949615 | 1.9379273  | 2.6444659  |
| H  | -3.1737855 | 0.0566284  | 3.2988505  |
| H  | 2.9806457  | -0.5440618 | 2.4946808  |
| H  | 2.3709950  | -2.6637524 | 3.6227759  |
| H  | -0.0168191 | -3.1263013 | 4.2706177  |
| H  | -1.7801840 | -1.4411310 | 3.7777907  |
| N  | -0.8674528 | 2.1174004  | 1.8745210  |
| H  | 0.7237230  | 2.9428306  | -1.3284374 |
| C  | 0.7759412  | 2.1447418  | -0.5880217 |
| C  | 0.7649805  | 0.9334115  | -0.2159492 |
| C  | 0.6374431  | -0.5091082 | -0.4762539 |
| H  | 1.5424555  | -1.0611915 | -0.1361967 |
| O  | 0.4464628  | -0.7112175 | -1.8951661 |
| H  | -0.2152662 | -0.9533645 | 0.0840899  |
| C  | 0.3120342  | -2.0094032 | -2.2835204 |
| C  | 0.1420535  | -2.1399345 | -3.7650974 |
| O  | 0.3329019  | -2.9454306 | -1.5003728 |
| C  | -0.1749361 | -2.5062572 | -6.5373558 |
| C  | -0.0310494 | -1.2097279 | -6.0112969 |
| C  | 0.1273187  | -1.0236341 | -4.6295330 |
| C  | -0.0029913 | -3.4390717 | -4.2974052 |
| C  | -0.1608425 | -3.6207548 | -5.6784601 |
| H  | -0.2979793 | -2.6493881 | -7.6239929 |
| H  | -0.0414565 | -0.3366498 | -6.6845058 |
| H  | 0.2423172  | -0.0138216 | -4.2085190 |
| H  | 0.0128639  | -4.2944664 | -3.6037226 |
| H  | -0.2728045 | -4.6372664 | -6.0904863 |

\$vibrational spectrum

| #  | mode | symmetry | wave number<br>cm**(-1) | IR intensity<br>km/mol | selection rules |       |
|----|------|----------|-------------------------|------------------------|-----------------|-------|
| #  |      |          |                         |                        | IR              | RAMAN |
| 1  |      |          | 0.00                    | 0.00000                | -               | -     |
| 2  |      |          | 0.00                    | 0.00000                | -               | -     |
| 3  |      |          | 0.00                    | 0.00000                | -               | -     |
| 4  |      |          | 0.00                    | 0.00000                | -               | -     |
| 5  |      |          | 0.00                    | 0.00000                | -               | -     |
| 6  |      |          | 0.00                    | 0.00000                | -               | -     |
| 7  |      | a        | 12.69                   | 0.77150                | YES             | YES   |
| 8  |      | a        | 14.31                   | 0.44876                | YES             | YES   |
| 9  |      | a        | 27.98                   | 0.18749                | YES             | YES   |
| 10 |      | a        | 41.43                   | 0.34307                | YES             | YES   |
| 11 |      | a        | 51.94                   | 0.21434                | YES             | YES   |
| 12 |      | a        | 56.54                   | 0.08029                | YES             | YES   |
| 13 |      | a        | 68.27                   | 0.37237                | YES             | YES   |
| 14 |      | a        | 70.82                   | 0.45542                | YES             | YES   |
| 15 |      | a        | 83.57                   | 0.05551                | YES             | YES   |
| 16 |      | a        | 85.91                   | 0.91697                | YES             | YES   |
| 17 |      | a        | 96.63                   | 0.69206                | YES             | YES   |
| 18 |      | a        | 101.41                  | 0.21988                | YES             | YES   |
| 19 |      | a        | 107.13                  | 0.45072                | YES             | YES   |
| 20 |      | a        | 111.31                  | 0.30546                | YES             | YES   |
| 21 |      | a        | 128.18                  | 0.55150                | YES             | YES   |
| 22 |      | a        | 135.51                  | 0.37011                | YES             | YES   |
| 23 |      | a        | 157.84                  | 0.40895                | YES             | YES   |
| 24 |      | a        | 186.62                  | 0.71237                | YES             | YES   |
| 25 |      | a        | 188.13                  | 0.18813                | YES             | YES   |
| 26 |      | a        | 206.37                  | 1.05808                | YES             | YES   |
| 27 |      | a        | 220.77                  | 1.27731                | YES             | YES   |
| 28 |      | a        | 235.13                  | 0.37823                | YES             | YES   |
| 29 |      | a        | 265.42                  | 0.69843                | YES             | YES   |
| 30 |      | a        | 281.00                  | 2.87185                | YES             | YES   |
| 31 |      | a        | 293.67                  | 13.05060               | YES             | YES   |
| 32 |      | a        | 322.49                  | 3.95365                | YES             | YES   |
| 33 |      | a        | 354.65                  | 5.38279                | YES             | YES   |
| 34 |      | a        | 358.97                  | 1.99179                | YES             | YES   |
| 35 |      | a        | 396.54                  | 16.64607               | YES             | YES   |
| 36 |      | a        | 403.91                  | 0.00075                | YES             | YES   |
| 37 |      | a        | 418.13                  | 3.11457                | YES             | YES   |
| 38 |      | a        | 436.08                  | 2.26241                | YES             | YES   |
| 39 |      | a        | 445.18                  | 0.20183                | YES             | YES   |
| 40 |      | a        | 454.14                  | 2.00641                | YES             | YES   |
| 41 |      | a        | 458.13                  | 1.36604                | YES             | YES   |
| 42 |      | a        | 469.31                  | 2.75263                | YES             | YES   |
| 43 |      | a        | 473.59                  | 6.60098                | YES             | YES   |
| 44 |      | a        | 487.20                  | 4.16042                | YES             | YES   |
| 45 |      | a        | 491.46                  | 3.65311                | YES             | YES   |
| 46 |      | a        | 504.47                  | 3.40863                | YES             | YES   |
| 47 |      | a        | 529.10                  | 20.02646               | YES             | YES   |
| 48 |      | a        | 547.18                  | 6.22080                | YES             | YES   |
| 49 |      | a        | 557.27                  | 2.47483                | YES             | YES   |
| 50 |      | a        | 585.62                  | 8.21677                | YES             | YES   |

**2bc**

|                                            |                                       |
|--------------------------------------------|---------------------------------------|
| SCF Energy (au) BP86/SV(P)                 | -2281.120982087                       |
| SCF Energy (au) PBE0/def2-TZVPP            | -2280.691348894                       |
| SCF Energy (au) PBE0/def2-TZVPP            | -2280.6975966102 (Toluene Correction) |
| Zero Point Energy (au)                     | 0.3575200                             |
| Chemical Potential (kJ mol <sup>-1</sup> ) | 791.47                                |
| Dispersion Correction (au) PBE0/def2-TZVPP | -0.06509361                           |

xyz coordinates

47

|    |            |            |            |
|----|------------|------------|------------|
| Mn | 1.2025069  | 0.1620360  | 1.0932740  |
| C  | 1.9568143  | 0.6239857  | 2.6631145  |
| C  | 2.7626127  | -0.4707803 | 0.4843492  |
| C  | 1.4816754  | 1.8042180  | 0.3880616  |
| O  | 1.6872442  | 2.8755222  | -0.0350056 |
| O  | 3.7740952  | -0.8988125 | 0.0895477  |
| O  | 2.4567165  | 0.9146208  | 3.6736798  |
| C  | -1.2674439 | -0.3023652 | 2.6745928  |
| C  | -1.3912158 | 1.7610984  | 1.5612277  |
| C  | -2.6659539 | 2.0309656  | 2.0698859  |
| C  | -3.2584096 | 1.0819363  | 2.9213569  |
| C  | -2.5540902 | -0.0861767 | 3.2217314  |
| C  | -0.4365673 | -1.4859299 | 2.9195833  |
| C  | 0.8303787  | -1.5029309 | 2.2647405  |
| C  | 1.6666344  | -2.6177159 | 2.4886735  |
| C  | 1.2610305  | -3.6855246 | 3.3088101  |
| C  | 0.0017371  | -3.6623661 | 3.9393346  |
| C  | -0.8426867 | -2.5634264 | 3.7452354  |
| H  | -0.8890702 | 2.4838705  | 0.8994692  |
| H  | -3.1751348 | 2.9700773  | 1.8036640  |
| H  | -4.2600129 | 1.2541116  | 3.3483852  |
| H  | -2.9958712 | -0.8431618 | 3.8858832  |
| H  | 2.6605532  | -2.6671882 | 2.0133031  |
| H  | 1.9364916  | -4.5450173 | 3.4598796  |
| H  | -0.3169334 | -4.4982914 | 4.5831522  |
| H  | -1.8256840 | -2.5481467 | 4.2443786  |
| N  | -0.7037795 | 0.6342783  | 1.8461413  |
| C  | 0.1497651  | 0.7721964  | -2.1486257 |
| C  | 0.2718754  | -0.0683968 | -0.9320319 |
| C  | 0.1891642  | -1.1366730 | -0.2631221 |
| H  | -0.0993771 | -2.1746493 | -0.1043557 |
| C  | 1.4730397  | 0.8028500  | -2.9612945 |
| C  | -1.0183065 | 0.2671813  | -3.0382063 |
| H  | -0.0792297 | 1.8227280  | -1.8535928 |
| C  | -1.1565103 | 1.1132381  | -4.3163661 |
| H  | -1.9654677 | 0.2801394  | -2.4548417 |
| H  | -0.8234627 | -0.7970045 | -3.3086006 |
| H  | 2.2961270  | 1.1998921  | -2.3286030 |
| C  | 1.3263403  | 1.6449803  | -4.2404805 |
| H  | 1.7477958  | -0.2449558 | -3.2238571 |
| H  | 1.1602417  | 2.7121905  | -3.9595975 |
| H  | 2.2790566  | 1.6176752  | -4.8155415 |
| C  | 0.1575487  | 1.1588161  | -5.1149762 |
| H  | -1.4552353 | 2.1520586  | -4.0381253 |
| H  | -1.9808817 | 0.7083946  | -4.9460352 |
| H  | 0.0445918  | 1.8137098  | -6.0082216 |
| H  | 0.3872873  | 0.1367419  | -5.4999742 |

\$vibrational spectrum

| #  | mode | symmetry | wave number<br>cm**(-1) | IR intensity<br>km/mol | selection rules |       |
|----|------|----------|-------------------------|------------------------|-----------------|-------|
| #  |      |          |                         |                        | IR              | RAMAN |
| 1  |      |          | 0.00                    | 0.00000                | -               | -     |
| 2  |      |          | 0.00                    | 0.00000                | -               | -     |
| 3  |      |          | 0.00                    | 0.00000                | -               | -     |
| 4  |      |          | 0.00                    | 0.00000                | -               | -     |
| 5  |      |          | 0.00                    | 0.00000                | -               | -     |
| 6  |      |          | 0.00                    | 0.00000                | -               | -     |
| 7  |      | a        | 21.31                   | 0.24853                | YES             | YES   |
| 8  |      | a        | 34.94                   | 0.01906                | YES             | YES   |
| 9  |      | a        | 38.46                   | 0.04270                | YES             | YES   |
| 10 |      | a        | 56.12                   | 0.16270                | YES             | YES   |
| 11 |      | a        | 66.63                   | 0.03245                | YES             | YES   |
| 12 |      | a        | 77.27                   | 0.13836                | YES             | YES   |
| 13 |      | a        | 83.57                   | 0.79291                | YES             | YES   |
| 14 |      | a        | 91.64                   | 0.35616                | YES             | YES   |
| 15 |      | a        | 98.95                   | 0.67833                | YES             | YES   |
| 16 |      | a        | 107.88                  | 0.25597                | YES             | YES   |
| 17 |      | a        | 112.19                  | 0.26611                | YES             | YES   |
| 18 |      | a        | 116.96                  | 0.11094                | YES             | YES   |
| 19 |      | a        | 125.21                  | 0.31890                | YES             | YES   |
| 20 |      | a        | 144.42                  | 2.49941                | YES             | YES   |
| 21 |      | a        | 170.19                  | 2.12557                | YES             | YES   |
| 22 |      | a        | 188.62                  | 1.02686                | YES             | YES   |
| 23 |      | a        | 213.81                  | 0.39124                | YES             | YES   |
| 24 |      | a        | 230.38                  | 0.08836                | YES             | YES   |
| 25 |      | a        | 242.25                  | 1.38666                | YES             | YES   |
| 26 |      | a        | 245.53                  | 2.60861                | YES             | YES   |
| 27 |      | a        | 264.09                  | 0.25243                | YES             | YES   |
| 28 |      | a        | 284.24                  | 0.01913                | YES             | YES   |
| 29 |      | a        | 348.77                  | 2.37378                | YES             | YES   |
| 30 |      | a        | 358.13                  | 2.17632                | YES             | YES   |
| 31 |      | a        | 381.93                  | 9.42387                | YES             | YES   |
| 32 |      | a        | 409.55                  | 0.56836                | YES             | YES   |
| 33 |      | a        | 417.09                  | 5.99506                | YES             | YES   |
| 34 |      | a        | 425.66                  | 0.41850                | YES             | YES   |
| 35 |      | a        | 436.05                  | 0.68267                | YES             | YES   |
| 36 |      | a        | 454.69                  | 13.16624               | YES             | YES   |
| 37 |      | a        | 457.31                  | 1.49122                | YES             | YES   |
| 38 |      | a        | 473.52                  | 2.84621                | YES             | YES   |
| 39 |      | a        | 483.72                  | 3.74094                | YES             | YES   |
| 40 |      | a        | 493.07                  | 1.51086                | YES             | YES   |
| 41 |      | a        | 495.13                  | 1.75850                | YES             | YES   |
| 42 |      | a        | 497.07                  | 5.09040                | YES             | YES   |
| 43 |      | a        | 505.51                  | 2.43664                | YES             | YES   |
| 44 |      | a        | 535.73                  | 28.50850               | YES             | YES   |
| 45 |      | a        | 548.84                  | 10.33325               | YES             | YES   |
| 46 |      | a        | 557.11                  | 1.46236                | YES             | YES   |
| 47 |      | a        | 563.44                  | 9.53427                | YES             | YES   |
| 48 |      | a        | 615.81                  | 12.89888               | YES             | YES   |
| 49 |      | a        | 624.34                  | 4.08364                | YES             | YES   |
| 50 |      | a        | 627.92                  | 29.19440               | YES             | YES   |

**2bc'**

|                                            |                                       |
|--------------------------------------------|---------------------------------------|
| SCF Energy (au) BP86/SV(P)                 | -2281.119860015                       |
| SCF Energy (au) PBE0/def2-TZVPP            | -2280.690435817                       |
| SCF Energy (au) PBE0/def2-TZVPP            | -2280.6964385324 (Toluene Correction) |
| Zero Point Energy (au)                     | 0.3576711                             |
| Chemical Potential (kJ mol <sup>-1</sup> ) | 793.30                                |
| Dispersion Correction (au) PBE0/def2-TZVPP | -0.06716635                           |

xyz coordinates

47

|    |            |            |            |
|----|------------|------------|------------|
| Mn | 1.0348289  | 2.0037251  | 0.7072396  |
| C  | 1.3546343  | 2.3648770  | 2.4445458  |
| C  | 2.7685807  | 1.6679846  | 0.4096337  |
| C  | 1.1942521  | 3.7522247  | 0.2578736  |
| O  | 1.3200183  | 4.8827259  | -0.0095936 |
| O  | 3.8951655  | 1.4302241  | 0.2189937  |
| O  | 1.5757112  | 2.6034661  | 3.5623050  |
| C  | -1.5965905 | 0.9998528  | 1.6467973  |
| C  | -1.8317482 | 3.1290658  | 0.6865140  |
| C  | -3.2127062 | 3.1468550  | 0.9091137  |
| C  | -3.8017169 | 2.0327022  | 1.5320069  |
| C  | -2.9882074 | 0.9577381  | 1.8992821  |
| C  | -0.6444245 | -0.0631017 | 1.9870364  |
| C  | 0.7165889  | 0.1839616  | 1.6335863  |
| C  | 1.6659530  | -0.7997902 | 1.9866181  |
| C  | 1.2861615  | -1.9957063 | 2.6221302  |
| C  | -0.0641999 | -2.2359852 | 2.9407155  |
| C  | -1.0246722 | -1.2672621 | 2.6284229  |
| H  | -1.3310466 | 3.9832302  | 0.2046771  |
| H  | -3.8068641 | 4.0207289  | 0.6004812  |
| H  | -4.8858393 | 2.0035153  | 1.7292105  |
| H  | -3.4267504 | 0.0739880  | 2.3855938  |
| H  | 2.7350754  | -0.6397247 | 1.7674973  |
| H  | 2.0539780  | -2.7462203 | 2.8771043  |
| H  | -0.3635825 | -3.1712938 | 3.4410703  |
| H  | -2.0788268 | -1.4523673 | 2.8937919  |
| N  | -1.0386625 | 2.0959762  | 1.0422653  |
| H  | 0.5636553  | 2.8721143  | -2.1221330 |
| C  | 0.6035118  | 2.0483260  | -1.4099698 |
| C  | 0.5517948  | 0.8292798  | -1.0716342 |
| C  | 0.3951208  | -0.6125177 | -1.3884540 |
| C  | 1.7673471  | -1.2751013 | -1.6862411 |
| C  | -0.5722618 | -0.8124266 | -2.5852298 |
| H  | -0.0375554 | -1.1334973 | -0.5047080 |
| C  | -0.7282709 | -2.3028996 | -2.9361699 |
| H  | -0.1700283 | -0.2584620 | -3.4657544 |
| H  | -1.5610590 | -0.3609318 | -2.3471509 |
| H  | 2.2469902  | -0.7321242 | -2.5336279 |
| C  | 1.6047150  | -2.7634174 | -2.0409011 |
| H  | 2.4376173  | -1.1564950 | -0.8086280 |
| H  | -1.4020842 | -2.4135281 | -3.8158544 |
| H  | -1.2286084 | -2.8281054 | -2.0881917 |
| C  | 0.6309114  | -2.9683156 | -3.2143939 |
| H  | 2.5998664  | -3.2014382 | -2.2815466 |
| H  | 1.2262434  | -3.3119724 | -1.1461211 |
| H  | 0.4947536  | -4.0544028 | -3.4193741 |
| H  | 1.0722309  | -2.5254750 | -4.1388293 |



\$vibrational spectrum

| #  | mode | symmetry | wave number<br>cm**(-1) | IR intensity<br>km/mol | selection rules |       |
|----|------|----------|-------------------------|------------------------|-----------------|-------|
| #  |      |          |                         |                        | IR              | RAMAN |
| 1  |      |          | 0.00                    | 0.00000                | -               | -     |
| 2  |      |          | 0.00                    | 0.00000                | -               | -     |
| 3  |      |          | 0.00                    | 0.00000                | -               | -     |
| 4  |      |          | 0.00                    | 0.00000                | -               | -     |
| 5  |      |          | 0.00                    | 0.00000                | -               | -     |
| 6  |      |          | 0.00                    | 0.00000                | -               | -     |
| 7  |      | a        | 24.72                   | 0.36389                | YES             | YES   |
| 8  |      | a        | 41.59                   | 0.07488                | YES             | YES   |
| 9  |      | a        | 45.25                   | 0.06575                | YES             | YES   |
| 10 |      | a        | 52.15                   | 0.11210                | YES             | YES   |
| 11 |      | a        | 63.64                   | 0.04811                | YES             | YES   |
| 12 |      | a        | 76.29                   | 0.28325                | YES             | YES   |
| 13 |      | a        | 87.06                   | 0.59299                | YES             | YES   |
| 14 |      | a        | 94.90                   | 0.57956                | YES             | YES   |
| 15 |      | a        | 96.08                   | 0.16813                | YES             | YES   |
| 16 |      | a        | 104.24                  | 0.55311                | YES             | YES   |
| 17 |      | a        | 111.89                  | 0.16725                | YES             | YES   |
| 18 |      | a        | 117.23                  | 0.10103                | YES             | YES   |
| 19 |      | a        | 125.86                  | 0.20698                | YES             | YES   |
| 20 |      | a        | 155.34                  | 0.95071                | YES             | YES   |
| 21 |      | a        | 176.64                  | 2.31596                | YES             | YES   |
| 22 |      | a        | 189.40                  | 0.72962                | YES             | YES   |
| 23 |      | a        | 217.68                  | 0.38679                | YES             | YES   |
| 24 |      | a        | 228.82                  | 1.35028                | YES             | YES   |
| 25 |      | a        | 239.91                  | 0.04320                | YES             | YES   |
| 26 |      | a        | 252.70                  | 0.27808                | YES             | YES   |
| 27 |      | a        | 267.89                  | 0.60585                | YES             | YES   |
| 28 |      | a        | 285.93                  | 0.07364                | YES             | YES   |
| 29 |      | a        | 357.82                  | 1.81800                | YES             | YES   |
| 30 |      | a        | 358.68                  | 1.20955                | YES             | YES   |
| 31 |      | a        | 379.42                  | 12.58201               | YES             | YES   |
| 32 |      | a        | 413.80                  | 2.47893                | YES             | YES   |
| 33 |      | a        | 421.06                  | 2.16931                | YES             | YES   |
| 34 |      | a        | 425.08                  | 1.18950                | YES             | YES   |
| 35 |      | a        | 436.27                  | 1.59759                | YES             | YES   |
| 36 |      | a        | 457.23                  | 1.43469                | YES             | YES   |
| 37 |      | a        | 460.02                  | 1.13592                | YES             | YES   |
| 38 |      | a        | 472.28                  | 2.42811                | YES             | YES   |
| 39 |      | a        | 485.41                  | 5.28717                | YES             | YES   |
| 40 |      | a        | 489.47                  | 2.52597                | YES             | YES   |
| 41 |      | a        | 494.19                  | 9.12418                | YES             | YES   |
| 42 |      | a        | 498.54                  | 0.71289                | YES             | YES   |
| 43 |      | a        | 508.60                  | 2.78867                | YES             | YES   |
| 44 |      | a        | 529.06                  | 16.45843               | YES             | YES   |
| 45 |      | a        | 554.23                  | 2.74309                | YES             | YES   |
| 46 |      | a        | 558.08                  | 2.78602                | YES             | YES   |
| 47 |      | a        | 580.21                  | 5.14682                | YES             | YES   |
| 48 |      | a        | 615.69                  | 26.75293               | YES             | YES   |
| 49 |      | a        | 623.84                  | 7.32930                | YES             | YES   |
| 50 |      | a        | 627.13                  | 24.83024               | YES             | YES   |

**2bd**

|                                            |                                       |
|--------------------------------------------|---------------------------------------|
| SCF Energy (au) BP86/SV(P)                 | -2411.386418687                       |
| SCF Energy (au) PBE0/def2-TZVPP            | -2410.929730749                       |
| SCF Energy (au) PBE0/def2-TZVPP            | -2410.9384397830 (Toluene Correction) |
| Zero Point Energy (au)                     | 0.3601077                             |
| Chemical Potential (kJ mol <sup>-1</sup> ) | 781.98                                |
| Dispersion Correction (au) PBE0/def2-TZVPP | -0.06936495                           |

xyz coordinates

49

|    |            |            |            |
|----|------------|------------|------------|
| Mn | 1.3925957  | -0.2876905 | 1.7876510  |
| C  | 1.8013007  | 0.3501230  | 3.4179483  |
| C  | 3.0913075  | -0.7763907 | 1.5034861  |
| C  | 1.6475177  | 1.3305527  | 1.0040488  |
| O  | 1.8535412  | 2.3906773  | 0.5573821  |
| O  | 4.1949478  | -1.1118628 | 1.3195940  |
| O  | 2.0741051  | 0.7505419  | 4.4776491  |
| C  | -1.2733784 | -0.9329752 | 2.9018538  |
| C  | -1.3729850 | 1.0364967  | 1.6250640  |
| C  | -2.7435242 | 1.1929112  | 1.8591491  |
| C  | -3.3985417 | 0.2359856  | 2.6539271  |
| C  | -2.6578172 | -0.8284409 | 3.1737159  |
| C  | -0.3957473 | -1.9991732 | 3.3944334  |
| C  | 0.9719780  | -1.9081982 | 2.9989035  |
| C  | 1.8536763  | -2.9048410 | 3.4696009  |
| C  | 1.4022611  | -3.9601422 | 4.2816231  |
| C  | 0.0462868  | -4.0446748 | 4.6538200  |
| C  | -0.8488814 | -3.0647430 | 4.2109765  |
| H  | -0.8228403 | 1.7657238  | 1.0107653  |
| H  | -3.2774785 | 2.0527496  | 1.4261788  |
| H  | -4.4767091 | 0.3212295  | 2.8676273  |
| H  | -3.1472115 | -1.5898039 | 3.7984506  |
| H  | 2.9227283  | -2.8677717 | 3.1999172  |
| H  | 2.1173776  | -4.7245731 | 4.6315816  |
| H  | -0.3082608 | -4.8711275 | 5.2912563  |
| H  | -1.9088144 | -3.1333749 | 4.5079584  |
| N  | -0.6495121 | 0.0106224  | 2.1251006  |
| C  | 0.5362402  | 0.0227771  | -1.5621652 |
| C  | 1.5876226  | 0.6627500  | -2.2691490 |
| C  | 1.3426892  | 1.4197705  | -3.4145819 |
| C  | 0.0190698  | 1.5921664  | -3.9213900 |
| C  | -1.0380191 | 0.9549214  | -3.2052885 |
| C  | -0.7817999 | 0.1962930  | -2.0610430 |
| H  | 2.6225990  | 0.5547868  | -1.9084296 |
| H  | 2.1984547  | 1.8871607  | -3.9215151 |
| N  | -0.2266218 | 2.3434817  | -5.0577128 |
| H  | -2.0784857 | 1.0466807  | -3.5477473 |
| H  | -1.6206983 | -0.2895092 | -1.5372084 |
| C  | 0.7777766  | -0.8031245 | -0.4136716 |
| C  | 0.8486570  | -1.7866419 | 0.3766648  |
| H  | 0.8017729  | -2.8648223 | 0.5341916  |
| C  | -1.5867253 | 2.5044316  | -5.5419388 |
| C  | 0.8740447  | 2.9812261  | -5.7608789 |
| H  | -1.5795323 | 3.1316451  | -6.4551821 |
| H  | -2.2440036 | 3.0052468  | -4.7904017 |
| H  | -2.0562801 | 1.5261755  | -5.8054631 |
| H  | 1.4160308  | 3.7142408  | -5.1163019 |
| H  | 0.4790910  | 3.5301722  | -6.6385994 |
| H  | 1.6201958  | 2.2383414  | -6.1318513 |

\$vibrational spectrum

| #  | mode | symmetry | wave number<br>cm**(-1) | IR intensity<br>km/mol | selection rules |       |
|----|------|----------|-------------------------|------------------------|-----------------|-------|
| #  |      |          |                         |                        | IR              | RAMAN |
| 1  |      |          | 0.00                    | 0.00000                | -               | -     |
| 2  |      |          | 0.00                    | 0.00000                | -               | -     |
| 3  |      |          | 0.00                    | 0.00000                | -               | -     |
| 4  |      |          | 0.00                    | 0.00000                | -               | -     |
| 5  |      |          | 0.00                    | 0.00000                | -               | -     |
| 6  |      |          | 0.00                    | 0.00000                | -               | -     |
| 7  |      | a        | 9.77                    | 0.32390                | YES             | YES   |
| 8  |      | a        | 19.49                   | 0.47829                | YES             | YES   |
| 9  |      | a        | 27.15                   | 0.84414                | YES             | YES   |
| 10 |      | a        | 46.55                   | 0.42645                | YES             | YES   |
| 11 |      | a        | 59.63                   | 0.00369                | YES             | YES   |
| 12 |      | a        | 65.68                   | 0.40984                | YES             | YES   |
| 13 |      | a        | 73.58                   | 0.27310                | YES             | YES   |
| 14 |      | a        | 77.07                   | 1.07304                | YES             | YES   |
| 15 |      | a        | 85.22                   | 1.87030                | YES             | YES   |
| 16 |      | a        | 86.06                   | 0.62738                | YES             | YES   |
| 17 |      | a        | 93.48                   | 0.56900                | YES             | YES   |
| 18 |      | a        | 101.53                  | 1.07347                | YES             | YES   |
| 19 |      | a        | 105.80                  | 0.14299                | YES             | YES   |
| 20 |      | a        | 110.21                  | 0.77764                | YES             | YES   |
| 21 |      | a        | 113.50                  | 1.28888                | YES             | YES   |
| 22 |      | a        | 119.50                  | 10.86627               | YES             | YES   |
| 23 |      | a        | 145.24                  | 8.95151                | YES             | YES   |
| 24 |      | a        | 176.05                  | 12.15749               | YES             | YES   |
| 25 |      | a        | 189.53                  | 2.39487                | YES             | YES   |
| 26 |      | a        | 211.64                  | 0.15863                | YES             | YES   |
| 27 |      | a        | 222.89                  | 0.47711                | YES             | YES   |
| 28 |      | a        | 238.63                  | 2.17760                | YES             | YES   |
| 29 |      | a        | 247.84                  | 5.48849                | YES             | YES   |
| 30 |      | a        | 261.30                  | 2.39248                | YES             | YES   |
| 31 |      | a        | 271.68                  | 15.76820               | YES             | YES   |
| 32 |      | a        | 287.07                  | 1.13771                | YES             | YES   |
| 33 |      | a        | 340.00                  | 40.93114               | YES             | YES   |
| 34 |      | a        | 358.73                  | 1.91607                | YES             | YES   |
| 35 |      | a        | 380.91                  | 7.35874                | YES             | YES   |
| 36 |      | a        | 416.00                  | 11.15977               | YES             | YES   |
| 37 |      | a        | 416.77                  | 1.74031                | YES             | YES   |
| 38 |      | a        | 430.09                  | 6.89579                | YES             | YES   |
| 39 |      | a        | 444.10                  | 19.38440               | YES             | YES   |
| 40 |      | a        | 454.05                  | 5.54465                | YES             | YES   |
| 41 |      | a        | 456.73                  | 3.22540                | YES             | YES   |
| 42 |      | a        | 463.11                  | 1.77583                | YES             | YES   |
| 43 |      | a        | 477.34                  | 6.19032                | YES             | YES   |
| 44 |      | a        | 488.73                  | 3.79858                | YES             | YES   |
| 45 |      | a        | 490.92                  | 32.76320               | YES             | YES   |
| 46 |      | a        | 493.72                  | 5.07364                | YES             | YES   |
| 47 |      | a        | 503.77                  | 0.62555                | YES             | YES   |
| 48 |      | a        | 515.82                  | 15.69978               | YES             | YES   |
| 49 |      | a        | 530.05                  | 43.15597               | YES             | YES   |
| 50 |      | a        | 541.11                  | 9.60241                | YES             | YES   |

**2bd'**

|                                            |                                       |
|--------------------------------------------|---------------------------------------|
| SCF Energy (au) BP86/SV(P)                 | -2411.383229723                       |
| SCF Energy (au) PBE0/def2-TZVPP            | -2410.926493690                       |
| SCF Energy (au) PBE0/def2-TZVPP            | -2410.9348447962 (Toluene Correction) |
| Zero Point Energy (au)                     | 0.3602809                             |
| Chemical Potential (kJ mol <sup>-1</sup> ) | 784.73                                |
| Dispersion Correction (au) PBE0/def2-TZVPP | -0.07187072                           |

## xyz coordinates

49

|    |            |            |            |
|----|------------|------------|------------|
| Mn | 1.2663945  | 2.7708307  | 0.7416893  |
| C  | 1.4115506  | 3.1773508  | 2.4898686  |
| C  | 3.0235475  | 2.4470980  | 0.6081276  |
| C  | 1.4377476  | 4.5142685  | 0.2781122  |
| O  | 1.5718707  | 5.6406263  | -0.0035219 |
| O  | 4.1629481  | 2.2064819  | 0.5236885  |
| O  | 1.5137044  | 3.4534435  | 3.6166834  |
| C  | -1.4098168 | 1.6986085  | 1.4244989  |
| C  | -1.6060832 | 3.7981651  | 0.3895549  |
| C  | -3.0028394 | 3.7713887  | 0.4556699  |
| C  | -3.6212881 | 2.6491378  | 1.0354332  |
| C  | -2.8195531 | 1.6122698  | 1.5180890  |
| C  | -0.4678684 | 0.6812651  | 1.8996707  |
| C  | 0.9129646  | 0.9617008  | 1.6764839  |
| C  | 1.8511667  | 0.0264272  | 2.1633669  |
| C  | 1.4456810  | -1.1538910 | 2.8107245  |
| C  | 0.0782650  | -1.4282234 | 3.0020761  |
| C  | -0.8747426 | -0.5094966 | 2.5486916  |
| H  | -1.0820154 | 4.6583592  | -0.0550827 |
| H  | -3.5867634 | 4.6172874  | 0.0613717  |
| H  | -4.7193202 | 2.5851346  | 1.1094389  |
| H  | -3.2796616 | 0.7219630  | 1.9712661  |
| H  | 2.9317907  | 0.2123774  | 2.0422032  |
| H  | 2.2063352  | -1.8663679 | 3.1738634  |
| H  | -0.2418906 | -2.3522338 | 3.5107730  |
| H  | -1.9446100 | -0.7226850 | 2.7103168  |
| N  | -0.8239537 | 2.8016353  | 0.8578603  |
| H  | 1.1464438  | 3.5642565  | -2.1452500 |
| C  | 1.0506260  | 2.7722205  | -1.4007081 |
| C  | 0.9395331  | 1.5400747  | -1.1284499 |
| C  | 0.6900209  | 0.1433434  | -1.3608377 |
| C  | 0.1781382  | -2.6299613 | -1.9369723 |
| C  | 1.4415419  | -2.1922956 | -1.4386935 |
| C  | 1.6820764  | -0.8477882 | -1.1527721 |
| C  | -0.5672552 | -0.2881822 | -1.8552967 |
| C  | -0.8214450 | -1.6326957 | -2.1363533 |
| N  | -0.0659869 | -3.9654548 | -2.2155184 |
| H  | 2.2525575  | -2.9136067 | -1.2664274 |
| H  | 2.6699657  | -0.5470040 | -0.7712270 |
| H  | -1.3600945 | 0.4573031  | -2.0274221 |
| H  | -1.8144344 | -1.9063088 | -2.5204744 |
| C  | -1.3609442 | -4.3745029 | -2.7290627 |
| C  | 0.9772797  | -4.9540055 | -2.0061756 |
| H  | -1.6005157 | -3.8869288 | -3.7054739 |
| H  | -2.1894685 | -4.1344632 | -2.0195169 |
| H  | -1.3624895 | -5.4706853 | -2.8908988 |
| H  | 1.3071293  | -4.9967255 | -0.9402114 |
| H  | 1.8802211  | -4.7528585 | -2.6321530 |
| H  | 0.5935398  | -5.9566532 | -2.2810229 |

\$vibrational spectrum

| #  | mode | symmetry | wave number<br>cm**(-1) | IR intensity<br>km/mol | selection rules |       |
|----|------|----------|-------------------------|------------------------|-----------------|-------|
| #  |      |          |                         |                        | IR              | RAMAN |
| 1  |      |          | 0.00                    | 0.00000                | -               | -     |
| 2  |      |          | 0.00                    | 0.00000                | -               | -     |
| 3  |      |          | 0.00                    | 0.00000                | -               | -     |
| 4  |      |          | 0.00                    | 0.00000                | -               | -     |
| 5  |      |          | 0.00                    | 0.00000                | -               | -     |
| 6  |      |          | 0.00                    | 0.00000                | -               | -     |
| 7  |      | a        | 11.44                   | 0.42500                | YES             | YES   |
| 8  |      | a        | 22.17                   | 0.05493                | YES             | YES   |
| 9  |      | a        | 36.74                   | 0.87475                | YES             | YES   |
| 10 |      | a        | 48.62                   | 0.05701                | YES             | YES   |
| 11 |      | a        | 58.52                   | 1.12493                | YES             | YES   |
| 12 |      | a        | 66.92                   | 0.69761                | YES             | YES   |
| 13 |      | a        | 74.69                   | 0.34991                | YES             | YES   |
| 14 |      | a        | 78.56                   | 0.56269                | YES             | YES   |
| 15 |      | a        | 84.94                   | 0.59614                | YES             | YES   |
| 16 |      | a        | 92.36                   | 1.30066                | YES             | YES   |
| 17 |      | a        | 94.03                   | 0.15738                | YES             | YES   |
| 18 |      | a        | 97.12                   | 1.58291                | YES             | YES   |
| 19 |      | a        | 104.13                  | 0.18552                | YES             | YES   |
| 20 |      | a        | 109.18                  | 0.28495                | YES             | YES   |
| 21 |      | a        | 117.19                  | 0.83929                | YES             | YES   |
| 22 |      | a        | 128.57                  | 2.09589                | YES             | YES   |
| 23 |      | a        | 149.49                  | 6.73147                | YES             | YES   |
| 24 |      | a        | 184.48                  | 5.05036                | YES             | YES   |
| 25 |      | a        | 194.26                  | 4.53220                | YES             | YES   |
| 26 |      | a        | 214.95                  | 0.25485                | YES             | YES   |
| 27 |      | a        | 216.70                  | 1.13080                | YES             | YES   |
| 28 |      | a        | 232.49                  | 1.84431                | YES             | YES   |
| 29 |      | a        | 250.02                  | 1.07986                | YES             | YES   |
| 30 |      | a        | 263.54                  | 0.20893                | YES             | YES   |
| 31 |      | a        | 279.47                  | 8.73793                | YES             | YES   |
| 32 |      | a        | 286.00                  | 0.78289                | YES             | YES   |
| 33 |      | a        | 338.56                  | 29.90249               | YES             | YES   |
| 34 |      | a        | 359.12                  | 2.14220                | YES             | YES   |
| 35 |      | a        | 389.80                  | 11.97136               | YES             | YES   |
| 36 |      | a        | 414.66                  | 1.31078                | YES             | YES   |
| 37 |      | a        | 416.05                  | 1.78230                | YES             | YES   |
| 38 |      | a        | 428.09                  | 10.10769               | YES             | YES   |
| 39 |      | a        | 441.38                  | 4.97791                | YES             | YES   |
| 40 |      | a        | 453.54                  | 0.48186                | YES             | YES   |
| 41 |      | a        | 458.02                  | 1.92772                | YES             | YES   |
| 42 |      | a        | 467.96                  | 3.93729                | YES             | YES   |
| 43 |      | a        | 475.17                  | 0.36120                | YES             | YES   |
| 44 |      | a        | 488.63                  | 5.04201                | YES             | YES   |
| 45 |      | a        | 491.82                  | 6.89705                | YES             | YES   |
| 46 |      | a        | 494.74                  | 10.14941               | YES             | YES   |
| 47 |      | a        | 503.51                  | 1.69264                | YES             | YES   |
| 48 |      | a        | 515.44                  | 19.65428               | YES             | YES   |
| 49 |      | a        | 532.86                  | 21.08297               | YES             | YES   |
| 50 |      | a        | 537.10                  | 6.36060                | YES             | YES   |

**2be**

```

SCF Energy (au) BP86/SV(P) -2391.960168240
SCF Energy (au) PBE0/def2-TZVPP -2391.515765535
SCF Energy (au) PBE0/def2-TZVPP -2391.5241006317 (Toluene Correction)
Zero Point Energy (au) 0.3213065
Chemical Potential (kJ mol-1) 689.58
Dispersion Correction (au) PBE0/def2-TZVPP -0.06471746

```

xyz coordinates

45

```

Mn 1.2454519 -0.1636177 1.2461568
C 1.6903274 0.3277975 2.9190853
C 2.9289665 -0.6687297 0.9011828
C 1.5333880 1.5091092 0.6006049
O 1.7617757 2.5966867 0.2410407
O 4.0223501 -1.0121397 0.6782891
O 1.9851445 0.6352659 4.0029599
C -1.4146805 -0.8122930 2.3802386
C -1.4917666 1.2371547 1.2347438
C -2.8522728 1.4111914 1.5105874
C -3.5136263 0.4212793 2.2581960
C -2.7895105 -0.6922078 2.6912325
C -0.5548900 -1.9308340 2.7806847
C 0.8047510 -1.8522571 2.3571412
C 1.6701394 -2.9000083 2.7373162
C 1.2087281 -3.9945510 3.4897093
C -0.1393528 -4.0664895 3.8914818
C -1.0169583 -3.0354668 3.5381285
H -0.9371454 1.9909849 0.6548643
H -3.3738921 2.3091286 1.1452779
H -4.5843606 0.5185292 2.5017612
H -3.2847640 -1.4804512 3.2767930
H 2.7327403 -2.8730782 2.4426186
H 1.9100487 -4.7995708 3.7689854
H -0.5016334 -4.9231798 4.4828214
H -2.0703379 -3.0946166 3.8588525
N -0.7844127 0.1642747 1.6516163
C 0.3793082 0.3930496 -2.0429389
C 1.4345356 1.0980323 -2.6697050
C 1.2055671 1.9129660 -3.7871178
C -0.1023718 2.0528749 -4.3032530
C -1.1681430 1.3593666 -3.6828095
C -0.9317977 0.5456915 -2.5743106
H 2.4585896 0.9989824 -2.2773754
H 2.0563759 2.4375977 -4.2458196
O -0.4334359 2.8199435 -5.3773085
H -2.1811248 1.4757238 -4.0991596
H -1.7678363 0.0040392 -2.1041006
C 0.6035550 -0.4910616 -0.9271151
C 0.6165874 -1.5478216 -0.2322546
H 0.5125044 -2.6303703 -0.1533227
C 0.5904440 3.5378490 -6.0467717
H 0.0933132 4.0802171 -6.8759145
H 1.3640469 2.8545614 -6.4703382
H 1.0856745 4.2764476 -5.3727552

```

\$vibrational spectrum

| # | mode | symmetry | wave number<br>cm**(-1) | IR intensity<br>km/mol | selection rules<br>IR RAMAN |
|---|------|----------|-------------------------|------------------------|-----------------------------|
| # |      |          |                         |                        |                             |
|   | 1    |          | 0.00                    | 0.00000                | - -                         |
|   | 2    |          | 0.00                    | 0.00000                | - -                         |
|   | 3    |          | 0.00                    | 0.00000                | - -                         |

|    |   |        |          |     |     |
|----|---|--------|----------|-----|-----|
| 4  |   | 0.00   | 0.00000  | -   | -   |
| 5  |   | 0.00   | 0.00000  | -   | -   |
| 6  |   | 0.00   | 0.00000  | -   | -   |
| 7  | a | 14.73  | 0.48528  | YES | YES |
| 8  | a | 27.54  | 0.12557  | YES | YES |
| 9  | a | 33.83  | 1.31325  | YES | YES |
| 10 | a | 49.40  | 0.41729  | YES | YES |
| 11 | a | 63.10  | 0.05113  | YES | YES |
| 12 | a | 68.82  | 0.12965  | YES | YES |
| 13 | a | 84.84  | 1.50868  | YES | YES |
| 14 | a | 87.60  | 0.96268  | YES | YES |
| 15 | a | 94.72  | 0.65057  | YES | YES |
| 16 | a | 98.26  | 0.23069  | YES | YES |
| 17 | a | 107.68 | 0.58782  | YES | YES |
| 18 | a | 111.22 | 0.26776  | YES | YES |
| 19 | a | 113.72 | 0.43342  | YES | YES |
| 20 | a | 124.37 | 0.81217  | YES | YES |
| 21 | a | 142.73 | 7.98195  | YES | YES |
| 22 | a | 152.38 | 4.16835  | YES | YES |
| 23 | a | 188.93 | 1.98886  | YES | YES |
| 24 | a | 208.51 | 4.11258  | YES | YES |
| 25 | a | 232.84 | 2.10901  | YES | YES |
| 26 | a | 242.91 | 6.62047  | YES | YES |
| 27 | a | 251.98 | 0.82755  | YES | YES |
| 28 | a | 262.32 | 0.48982  | YES | YES |
| 29 | a | 275.23 | 8.01602  | YES | YES |
| 30 | a | 286.09 | 0.47693  | YES | YES |
| 31 | a | 357.60 | 4.93075  | YES | YES |
| 32 | a | 371.46 | 41.59569 | YES | YES |
| 33 | a | 401.58 | 1.57177  | YES | YES |
| 34 | a | 410.70 | 0.87504  | YES | YES |
| 35 | a | 417.33 | 7.84680  | YES | YES |
| 36 | a | 431.89 | 5.36836  | YES | YES |
| 37 | a | 447.02 | 9.62630  | YES | YES |
| 38 | a | 456.52 | 1.15156  | YES | YES |
| 39 | a | 461.81 | 2.74505  | YES | YES |
| 40 | a | 475.05 | 13.77999 | YES | YES |
| 41 | a | 477.54 | 10.19568 | YES | YES |
| 42 | a | 488.10 | 3.35668  | YES | YES |
| 43 | a | 493.60 | 4.70623  | YES | YES |
| 44 | a | 503.81 | 2.30819  | YES | YES |
| 45 | a | 521.30 | 53.32399 | YES | YES |
| 46 | a | 530.71 | 22.79117 | YES | YES |
| 47 | a | 541.23 | 7.10764  | YES | YES |
| 48 | a | 551.30 | 6.72379  | YES | YES |
| 49 | a | 557.16 | 1.63201  | YES | YES |
| 50 | a | 610.92 | 29.31754 | YES | YES |

**2be'**

SCF Energy (au) BP86/SV(P) -2391.957322776  
 SCF Energy (au) PBE0/def2-TZVPP -2391.512741707  
 SCF Energy (au) PBE0/def2-TZVPP -2391.5210557956 (Toluene Correction)  
 Zero Point Energy (au) 0.3212850  
 Chemical Potential (kJ mol<sup>-1</sup>) 689.45  
 Dispersion Correction (au) PBE0/def2-TZVPP -0.06706478

## xyz coordinates

45

|    |            |            |            |
|----|------------|------------|------------|
| Mn | 1.2018114  | 2.3230176  | 0.7548611  |
| C  | 1.1966094  | 2.6674406  | 2.5251254  |
| C  | 2.9759053  | 2.0685991  | 0.7475998  |
| C  | 1.3417653  | 4.0885188  | 0.3717193  |
| O  | 1.4525414  | 5.2294814  | 0.1461870  |
| O  | 4.1263842  | 1.8728426  | 0.7439207  |
| O  | 1.2027896  | 2.9051979  | 3.6646116  |
| C  | -1.4774602 | 1.1365428  | 1.2069601  |
| C  | -1.6775184 | 3.2640542  | 0.2317406  |
| C  | -3.0735233 | 3.1863285  | 0.1953522  |
| C  | -3.6891506 | 2.0223060  | 0.6893591  |
| C  | -2.8858991 | 0.9971163  | 1.1939489  |
| C  | -0.5349590 | 0.1369759  | 1.7179660  |
| C  | 0.8469663  | 0.4745153  | 1.6144229  |
| C  | 1.7813724  | -0.4410436 | 2.1429074  |
| C  | 1.3738901  | -1.6595390 | 2.7139420  |
| C  | 0.0079458  | -1.9916137 | 2.7849735  |
| C  | -0.9429351 | -1.0919669 | 2.2907844  |
| H  | -1.1555815 | 4.1579091  | -0.1438556 |
| H  | -3.6592854 | 4.0254717  | -0.2104464 |
| H  | -4.7864733 | 1.9171727  | 0.6805989  |
| H  | -3.3436826 | 0.0755080  | 1.5820225  |
| H  | 2.8596110  | -0.2102367 | 2.1153004  |
| H  | 2.1313858  | -2.3568796 | 3.1110001  |
| H  | -0.3134988 | -2.9462274 | 3.2324524  |
| H  | -2.0125979 | -1.3508374 | 2.3596834  |
| N  | -0.8945810 | 2.2786934  | 0.7214380  |
| H  | 1.2437389  | 3.2338625  | -2.1008219 |
| C  | 1.1369187  | 2.4156359  | -1.3866901 |
| C  | 1.0657742  | 1.1735248  | -1.1394614 |
| C  | 0.9027471  | -0.2214474 | -1.4706394 |
| C  | 0.5774429  | -2.9415021 | -2.2325676 |
| C  | 1.7520298  | -2.5162861 | -1.5678323 |
| C  | 1.9080735  | -1.1843100 | -1.1866765 |
| C  | -0.2675862 | -0.6588157 | -2.1352765 |
| C  | -0.4362164 | -1.9999745 | -2.5139696 |
| O  | 0.5206688  | -4.2637539 | -2.5571430 |
| H  | 2.5333940  | -3.2634943 | -1.3587178 |
| H  | 2.8282443  | -0.8669552 | -0.6735143 |
| H  | -1.0597815 | 0.0716795  | -2.3632990 |
| H  | -1.3607870 | -2.2966877 | -3.0307668 |
| C  | -0.6259038 | -4.7517284 | -3.2312324 |
| H  | -0.7672266 | -4.2549073 | -4.2209286 |
| H  | -1.5520862 | -4.6194973 | -2.6224653 |
| H  | -0.4512763 | -5.8346902 | -3.3925732 |

## \$vibrational spectrum

| # | mode | symmetry | wave number           | IR intensity | selection rules |
|---|------|----------|-----------------------|--------------|-----------------|
| # |      |          | cm <sup>**</sup> (-1) | km/mol       | IR RAMAN        |
|   | 1    |          | 0.00                  | 0.00000      | - -             |
|   | 2    |          | 0.00                  | 0.00000      | - -             |
|   | 3    |          | 0.00                  | 0.00000      | - -             |



|    |   |        |          |     |     |
|----|---|--------|----------|-----|-----|
| 4  |   | 0.00   | 0.00000  | -   | -   |
| 5  |   | 0.00   | 0.00000  | -   | -   |
| 6  |   | 0.00   | 0.00000  | -   | -   |
| 7  | a | 13.39  | 0.19688  | YES | YES |
| 8  | a | 19.98  | 0.14787  | YES | YES |
| 9  | a | 44.37  | 0.00775  | YES | YES |
| 10 | a | 48.89  | 0.01718  | YES | YES |
| 11 | a | 61.20  | 0.59746  | YES | YES |
| 12 | a | 68.25  | 0.68447  | YES | YES |
| 13 | a | 81.88  | 0.18327  | YES | YES |
| 14 | a | 87.08  | 1.58370  | YES | YES |
| 15 | a | 95.70  | 0.24980  | YES | YES |
| 16 | a | 97.57  | 0.86361  | YES | YES |
| 17 | a | 102.60 | 0.63889  | YES | YES |
| 18 | a | 110.71 | 0.22605  | YES | YES |
| 19 | a | 117.52 | 0.87571  | YES | YES |
| 20 | a | 122.30 | 0.55115  | YES | YES |
| 21 | a | 150.40 | 5.39288  | YES | YES |
| 22 | a | 161.61 | 1.44765  | YES | YES |
| 23 | a | 190.00 | 0.15297  | YES | YES |
| 24 | a | 216.68 | 1.37135  | YES | YES |
| 25 | a | 225.75 | 4.27679  | YES | YES |
| 26 | a | 237.39 | 0.07127  | YES | YES |
| 27 | a | 253.95 | 0.92664  | YES | YES |
| 28 | a | 264.92 | 0.43227  | YES | YES |
| 29 | a | 278.53 | 4.50877  | YES | YES |
| 30 | a | 285.83 | 0.30984  | YES | YES |
| 31 | a | 358.53 | 2.62385  | YES | YES |
| 32 | a | 375.40 | 30.36449 | YES | YES |
| 33 | a | 396.79 | 5.19120  | YES | YES |
| 34 | a | 411.11 | 1.55916  | YES | YES |
| 35 | a | 417.35 | 3.54155  | YES | YES |
| 36 | a | 431.69 | 7.33705  | YES | YES |
| 37 | a | 441.25 | 3.09284  | YES | YES |
| 38 | a | 457.69 | 1.41522  | YES | YES |
| 39 | a | 467.45 | 2.67182  | YES | YES |
| 40 | a | 473.68 | 0.88691  | YES | YES |
| 41 | a | 487.20 | 13.32081 | YES | YES |
| 42 | a | 489.99 | 5.98088  | YES | YES |
| 43 | a | 492.50 | 15.77534 | YES | YES |
| 44 | a | 502.67 | 4.65991  | YES | YES |
| 45 | a | 517.38 | 1.53708  | YES | YES |
| 46 | a | 531.20 | 25.42967 | YES | YES |
| 47 | a | 538.74 | 7.43532  | YES | YES |
| 48 | a | 556.96 | 2.89561  | YES | YES |
| 49 | a | 566.53 | 2.71462  | YES | YES |
| 50 | a | 614.64 | 47.84106 | YES | YES |

**2bf**

SCF Energy (au) BP86/SV(P) -2376.686035034  
 SCF Energy (au) PBE0/def2-TZVPP -2376.263171392  
 SCF Energy (au) PBE0/def2-TZVPP -2376.2704120363 (Toluene Correction)  
 Zero Point Energy (au) 0.2818722  
 Chemical Potential (kJ mol<sup>-1</sup>) 591.01  
 Dispersion Correction (au) PBE0/def2-TZVPP -0.06135801

xyz coordinates

41

|    |            |            |            |
|----|------------|------------|------------|
| Mn | 1.3698504  | 0.2105297  | 0.6366223  |
| C  | 1.8030365  | 0.6855900  | 2.3195994  |
| C  | 3.0564347  | -0.2930315 | 0.2993493  |
| C  | 1.6658100  | 1.8905940  | 0.0127788  |
| O  | 1.8958418  | 2.9812785  | -0.3345833 |
| O  | 4.1506892  | -0.6357557 | 0.0829671  |
| O  | 2.0890447  | 0.9837826  | 3.4077538  |
| C  | -1.3001451 | -0.4349008 | 1.7536845  |
| C  | -1.3619793 | 1.6277135  | 0.6309972  |
| C  | -2.7232705 | 1.8043899  | 0.9005427  |
| C  | -3.3934818 | 0.8079514  | 1.6314084  |
| C  | -2.6767037 | -0.3132861 | 2.0565742  |
| C  | -0.4461613 | -1.5590405 | 2.1509347  |
| C  | 0.9172178  | -1.4817969 | 1.7399506  |
| C  | 1.7783799  | -2.5325499 | 2.1201434  |
| C  | 1.3081757  | -3.6313270 | 2.8607364  |
| C  | -0.0437438 | -3.7037738 | 3.2492435  |
| C  | -0.9163816 | -2.6685955 | 2.8960569  |
| H  | -0.8006641 | 2.3863890  | 0.0640316  |
| H  | -3.2386840 | 2.7090901  | 0.5432493  |
| H  | -4.4654821 | 0.9065288  | 1.8686038  |
| H  | -3.1790790 | -1.1058875 | 2.6299977  |
| H  | 2.8433144  | -2.5053590 | 1.8343217  |
| H  | 2.0055263  | -4.4394494 | 3.1405788  |
| H  | -0.4129731 | -4.5643381 | 3.8304449  |
| H  | -1.9726005 | -2.7281497 | 3.2068953  |
| N  | -0.6620770 | 0.5465688  | 1.0391254  |
| C  | 0.4232149  | 0.7503603  | -2.6191902 |
| C  | 1.4166841  | 1.5477296  | -3.2432736 |
| C  | 1.1096203  | 2.3325225  | -4.3616439 |
| C  | -0.2022105 | 2.3320446  | -4.8574375 |
| C  | -1.2107086 | 1.5617863  | -4.2621677 |
| C  | -0.8952720 | 0.7751300  | -3.1468047 |
| H  | 2.4446425  | 1.5412858  | -2.8500957 |
| H  | 1.8755802  | 2.9494154  | -4.8565640 |
| F  | -0.5016656 | 3.0885787  | -5.9302302 |
| H  | -2.2287345 | 1.5845994  | -4.6811698 |
| H  | -1.6753528 | 0.1596039  | -2.6721317 |
| C  | 0.7167115  | -0.1111110 | -1.4981636 |
| C  | 0.7573191  | -1.1846136 | -0.8280762 |
| H  | 0.6802769  | -2.2704970 | -0.7650598 |

\$vibrational spectrum

| # | mode | symmetry | wave number<br>cm** (-1) | IR intensity<br>km/mol | selection rules<br>IR | RAMAN |
|---|------|----------|--------------------------|------------------------|-----------------------|-------|
| # |      |          |                          |                        |                       |       |
| 1 |      |          | 0.00                     | 0.00000                | -                     | -     |
| 2 |      |          | 0.00                     | 0.00000                | -                     | -     |
| 3 |      |          | 0.00                     | 0.00000                | -                     | -     |
| 4 |      |          | 0.00                     | 0.00000                | -                     | -     |
| 5 |      |          | 0.00                     | 0.00000                | -                     | -     |
| 6 |      |          | 0.00                     | 0.00000                | -                     | -     |
| 7 |      | a        | 15.26                    | 0.30305                | YES                   | YES   |

|    |   |        |          |     |     |
|----|---|--------|----------|-----|-----|
| 8  | a | 22.55  | 0.21713  | YES | YES |
| 9  | a | 36.75  | 0.03404  | YES | YES |
| 10 | a | 54.19  | 0.12635  | YES | YES |
| 11 | a | 68.66  | 0.12992  | YES | YES |
| 12 | a | 69.04  | 0.03680  | YES | YES |
| 13 | a | 85.76  | 1.19921  | YES | YES |
| 14 | a | 89.39  | 0.32021  | YES | YES |
| 15 | a | 98.28  | 0.65821  | YES | YES |
| 16 | a | 108.74 | 0.22748  | YES | YES |
| 17 | a | 111.52 | 0.15179  | YES | YES |
| 18 | a | 112.93 | 0.28324  | YES | YES |
| 19 | a | 121.44 | 0.12117  | YES | YES |
| 20 | a | 139.59 | 2.64905  | YES | YES |
| 21 | a | 158.76 | 3.46708  | YES | YES |
| 22 | a | 189.00 | 1.22604  | YES | YES |
| 23 | a | 214.26 | 1.85074  | YES | YES |
| 24 | a | 239.50 | 0.51428  | YES | YES |
| 25 | a | 259.39 | 6.47716  | YES | YES |
| 26 | a | 264.27 | 3.68135  | YES | YES |
| 27 | a | 284.68 | 0.09891  | YES | YES |
| 28 | a | 357.70 | 3.02508  | YES | YES |
| 29 | a | 378.20 | 28.05821 | YES | YES |
| 30 | a | 391.70 | 11.00793 | YES | YES |
| 31 | a | 409.93 | 0.75986  | YES | YES |
| 32 | a | 415.89 | 1.48373  | YES | YES |
| 33 | a | 419.65 | 11.81778 | YES | YES |
| 34 | a | 435.47 | 6.80079  | YES | YES |
| 35 | a | 451.76 | 20.06276 | YES | YES |
| 36 | a | 456.40 | 2.32529  | YES | YES |
| 37 | a | 461.08 | 1.55757  | YES | YES |
| 38 | a | 477.37 | 5.21520  | YES | YES |
| 39 | a | 486.93 | 2.06431  | YES | YES |
| 40 | a | 493.26 | 5.14778  | YES | YES |
| 41 | a | 502.04 | 11.11529 | YES | YES |
| 42 | a | 503.59 | 1.08353  | YES | YES |
| 43 | a | 526.90 | 38.61188 | YES | YES |
| 44 | a | 538.69 | 9.57228  | YES | YES |
| 45 | a | 550.87 | 7.09999  | YES | YES |
| 46 | a | 556.89 | 1.66527  | YES | YES |
| 47 | a | 609.50 | 33.01311 | YES | YES |
| 48 | a | 622.64 | 9.01751  | YES | YES |
| 49 | a | 625.26 | 5.49474  | YES | YES |
| 50 | a | 630.58 | 8.65305  | YES | YES |

**2bf'**

SCF Energy (au) BP86/SV(P) -2376.684012464  
 SCF Energy (au) PBE0/def2-TZVPP -2376.261119915  
 SCF Energy (au) PBE0/def2-TZVPP -2376.2683674155 (Toluene Correction)  
 Zero Point Energy (au) 0.2819030  
 Chemical Potential (kJ mol<sup>-1</sup>) 591.74  
 Dispersion Correction (au) PBE0/def2-TZVPP -0.06372121

xyz coordinates

41

|    |            |            |            |
|----|------------|------------|------------|
| Mn | 1.2369841  | 1.8112428  | 0.2458945  |
| C  | 1.3710057  | 2.2239260  | 1.9979497  |
| C  | 2.9973830  | 1.4946875  | 0.1231146  |
| C  | 1.4070378  | 3.5547432  | -0.2208095 |
| O  | 1.5385251  | 4.6804844  | -0.5020000 |
| O  | 4.1374258  | 1.2590269  | 0.0458268  |
| O  | 1.4653967  | 2.5035421  | 3.1234923  |
| C  | -1.4385143 | 0.7493141  | 0.9600496  |
| C  | -1.6425046 | 2.8281922  | -0.1147058 |
| C  | -3.0389787 | 2.7999555  | -0.0423265 |
| C  | -3.6527406 | 1.6883888  | 0.5621785  |
| C  | -2.8474098 | 0.6622517  | 1.0618302  |
| C  | -0.4931389 | -0.2595865 | 1.4480186  |
| C  | 0.8870150  | 0.0197608  | 1.2230263  |
| C  | 1.8292920  | -0.9052704 | 1.7195257  |
| C  | 1.4267886  | -2.0811428 | 2.3776020  |
| C  | 0.0601603  | -2.3574599 | 2.5696724  |
| C  | -0.8958064 | -1.4457124 | 2.1080509  |
| H  | -1.1218721 | 3.6804176  | -0.5784063 |
| H  | -3.6263729 | 3.6366933  | -0.4506317 |
| H  | -4.7502280 | 1.6239560  | 0.6421708  |
| H  | -3.3044980 | -0.2195121 | 1.5341995  |
| H  | 2.9092528  | -0.7158254 | 1.5984144  |
| H  | 2.1890698  | -2.7877433 | 2.7481177  |
| H  | -0.2575013 | -3.2783312 | 3.0851389  |
| H  | -1.9647731 | -1.6620028 | 2.2701512  |
| N  | -0.8574199 | 1.8421104  | 0.3700461  |
| H  | 1.1178314  | 2.5991783  | -2.6467347 |
| C  | 1.0251692  | 1.8237949  | -1.8842664 |
| C  | 0.9074673  | 0.6019790  | -1.5617475 |
| C  | 0.6359327  | -0.7934439 | -1.8185723 |
| C  | 0.0850213  | -3.4861763 | -2.3995169 |
| C  | 1.3372732  | -3.1407576 | -1.8718695 |
| C  | 1.6054862  | -1.7987903 | -1.5754792 |
| C  | -0.6198875 | -1.1771431 | -2.3554369 |
| C  | -0.8990480 | -2.5194103 | -2.6455898 |
| F  | -0.1785803 | -4.7781744 | -2.6779051 |
| H  | 2.0861359  | -3.9282089 | -1.6949677 |
| H  | 2.5847550  | -1.5154101 | -1.1615720 |
| H  | -1.3812274 | -0.4052900 | -2.5485932 |
| H  | -1.8699069 | -2.8282538 | -3.0633400 |

vibrational spectrum

| # | mode | symmetry | wave number<br>cm** (-1) | IR intensity<br>km/mol | selection rules<br>IR | RAMAN |
|---|------|----------|--------------------------|------------------------|-----------------------|-------|
| # |      |          |                          |                        |                       |       |
| 1 |      |          | 0.00                     | 0.00000                | -                     | -     |
| 2 |      |          | 0.00                     | 0.00000                | -                     | -     |
| 3 |      |          | 0.00                     | 0.00000                | -                     | -     |
| 4 |      |          | 0.00                     | 0.00000                | -                     | -     |
| 5 |      |          | 0.00                     | 0.00000                | -                     | -     |
| 6 |      |          | 0.00                     | 0.00000                | -                     | -     |
| 7 |      | a        | 15.39                    | 0.27467                | YES                   | YES   |

|    |   |        |          |     |     |
|----|---|--------|----------|-----|-----|
| 8  | a | 21.55  | 0.51847  | YES | YES |
| 9  | a | 44.50  | 0.11890  | YES | YES |
| 10 | a | 50.19  | 0.06929  | YES | YES |
| 11 | a | 63.50  | 0.12389  | YES | YES |
| 12 | a | 70.81  | 0.39479  | YES | YES |
| 13 | a | 86.26  | 0.60158  | YES | YES |
| 14 | a | 93.80  | 0.51872  | YES | YES |
| 15 | a | 96.25  | 0.54080  | YES | YES |
| 16 | a | 103.98 | 0.46765  | YES | YES |
| 17 | a | 111.32 | 0.04869  | YES | YES |
| 18 | a | 112.85 | 0.20982  | YES | YES |
| 19 | a | 127.43 | 0.18839  | YES | YES |
| 20 | a | 148.93 | 1.14170  | YES | YES |
| 21 | a | 165.79 | 2.17073  | YES | YES |
| 22 | a | 189.15 | 0.17288  | YES | YES |
| 23 | a | 218.42 | 0.44821  | YES | YES |
| 24 | a | 231.41 | 2.55714  | YES | YES |
| 25 | a | 255.37 | 1.15210  | YES | YES |
| 26 | a | 271.20 | 1.74803  | YES | YES |
| 27 | a | 284.92 | 0.21224  | YES | YES |
| 28 | a | 358.46 | 2.27539  | YES | YES |
| 29 | a | 382.81 | 26.61717 | YES | YES |
| 30 | a | 389.11 | 7.98426  | YES | YES |
| 31 | a | 409.08 | 0.41539  | YES | YES |
| 32 | a | 411.80 | 2.83525  | YES | YES |
| 33 | a | 420.64 | 1.59546  | YES | YES |
| 34 | a | 434.52 | 4.52181  | YES | YES |
| 35 | a | 448.98 | 7.51490  | YES | YES |
| 36 | a | 457.87 | 1.61266  | YES | YES |
| 37 | a | 468.81 | 5.63922  | YES | YES |
| 38 | a | 476.20 | 2.44933  | YES | YES |
| 39 | a | 488.08 | 1.56393  | YES | YES |
| 40 | a | 490.83 | 1.81398  | YES | YES |
| 41 | a | 499.72 | 3.43406  | YES | YES |
| 42 | a | 505.68 | 14.63655 | YES | YES |
| 43 | a | 529.19 | 23.69735 | YES | YES |
| 44 | a | 535.60 | 4.82454  | YES | YES |
| 45 | a | 557.17 | 2.54145  | YES | YES |
| 46 | a | 565.67 | 3.11213  | YES | YES |
| 47 | a | 613.82 | 45.67900 | YES | YES |
| 48 | a | 622.84 | 13.82057 | YES | YES |
| 49 | a | 625.83 | 15.93175 | YES | YES |
| 50 | a | 629.85 | 3.56307  | YES | YES |

**2bg**

SCF Energy (au) BP86/SV(P) -2614.328819566  
 SCF Energy (au) PBE0/def2-TZVPP -2613.948640333  
 SCF Energy (au) PBE0/def2-TZVPP -2613.9559675194 (Toluene Correction)  
 Zero Point Energy (au) 0.2944290  
 Chemical Potential (kJ mol<sup>-1</sup>) 612.46  
 Dispersion Correction (au) PBE0/def2-TZVPP -0.06476787

xyz coordinates

44

|    |            |            |            |
|----|------------|------------|------------|
| Mn | 1.3766062  | -0.0299156 | 1.0645268  |
| C  | 1.8229581  | 0.4356415  | 2.7480525  |
| C  | 3.0622173  | -0.5265104 | 0.7094753  |
| C  | 1.6638503  | 1.6585459  | 0.4552845  |
| O  | 1.8874604  | 2.7516652  | 0.1141967  |
| O  | 4.1554677  | -0.8631109 | 0.4807096  |
| O  | 2.1184501  | 0.7296068  | 3.8343661  |
| C  | -1.2766004 | -0.6795420 | 2.2218831  |
| C  | -1.3620294 | 1.3794322  | 1.0940160  |
| C  | -2.7193760 | 1.5530719  | 1.3844939  |
| C  | -3.3748007 | 0.5573279  | 2.1295807  |
| C  | -2.6482706 | -0.5605927 | 2.5468182  |
| C  | -0.4139833 | -1.8012923 | 2.6080498  |
| C  | 0.9421134  | -1.7237824 | 2.1748488  |
| C  | 1.8120399  | -2.7718873 | 2.5409442  |
| C  | 1.3560960  | -3.8700920 | 3.2912667  |
| C  | 0.0112576  | -3.9433639 | 3.7031411  |
| C  | -0.8691605 | -2.9102356 | 3.3632339  |
| H  | -0.8122469 | 2.1383073  | 0.5159744  |
| H  | -3.2432126 | 2.4549779  | 1.0324646  |
| H  | -4.4429880 | 0.6539621  | 2.3839604  |
| H  | -3.1391444 | -1.3524911 | 3.1310133  |
| H  | 2.8717417  | -2.7431955 | 2.2367681  |
| H  | 2.0593057  | -4.6767524 | 3.5601350  |
| H  | -0.3465864 | -4.8032959 | 4.2922161  |
| H  | -1.9196367 | -2.9708702 | 3.6924543  |
| N  | -0.6527397 | 0.3016419  | 1.4946763  |
| C  | 0.4549691  | 0.5132800  | -2.1782245 |
| C  | 1.4807382  | 1.2754454  | -2.7931028 |
| C  | 1.2051413  | 2.0684467  | -3.9116446 |
| C  | -0.1007871 | 2.1280631  | -4.4365857 |
| C  | -1.1299957 | 1.3826546  | -3.8324164 |
| C  | -0.8568091 | 0.5831906  | -2.7158327 |
| H  | 2.5032306  | 1.2358872  | -2.3878685 |
| H  | 2.0116705  | 2.6551033  | -4.3782887 |
| C  | -0.3766414 | 2.9532026  | -5.6723436 |
| H  | -2.1527451 | 1.4310007  | -4.2369787 |
| H  | -1.6623480 | -0.0018611 | -2.2452578 |
| C  | 0.7144502  | -0.3458806 | -1.0471444 |
| C  | 0.7396745  | -1.4246914 | -0.3831151 |
| H  | 0.6447374  | -2.5096058 | -0.3253393 |
| F  | 0.3742405  | 4.0809757  | -5.7000792 |
| F  | -1.6778780 | 3.3258943  | -5.7536733 |
| F  | -0.0904370 | 2.2616444  | -6.8066550 |

\$vibrational spectrum

| # | mode | symmetry | wave number | IR intensity | selection rules |
|---|------|----------|-------------|--------------|-----------------|
| # |      |          | cm**(-1)    | km/mol       | IR RAMAN        |
|   | 1    |          | 0.00        | 0.00000      | - -             |
|   | 2    |          | 0.00        | 0.00000      | - -             |
|   | 3    |          | 0.00        | 0.00000      | - -             |
|   | 4    |          | 0.00        | 0.00000      | - -             |

|    |   |        |          |     |     |
|----|---|--------|----------|-----|-----|
| 5  |   | 0.00   | 0.00000  | -   | -   |
| 6  |   | 0.00   | 0.00000  | -   | -   |
| 7  | a | 12.17  | 0.41522  | YES | YES |
| 8  | a | 20.39  | 0.15130  | YES | YES |
| 9  | a | 35.27  | 0.10531  | YES | YES |
| 10 | a | 37.43  | 0.03820  | YES | YES |
| 11 | a | 49.21  | 0.09937  | YES | YES |
| 12 | a | 62.82  | 0.21459  | YES | YES |
| 13 | a | 69.00  | 0.07337  | YES | YES |
| 14 | a | 83.96  | 0.19366  | YES | YES |
| 15 | a | 85.66  | 1.32995  | YES | YES |
| 16 | a | 92.84  | 0.36282  | YES | YES |
| 17 | a | 95.29  | 0.95302  | YES | YES |
| 18 | a | 106.47 | 0.10456  | YES | YES |
| 19 | a | 109.91 | 0.10488  | YES | YES |
| 20 | a | 113.97 | 0.26757  | YES | YES |
| 21 | a | 122.89 | 0.94308  | YES | YES |
| 22 | a | 152.58 | 1.00454  | YES | YES |
| 23 | a | 178.29 | 2.11843  | YES | YES |
| 24 | a | 187.68 | 2.07863  | YES | YES |
| 25 | a | 204.44 | 0.65822  | YES | YES |
| 26 | a | 223.75 | 0.27808  | YES | YES |
| 27 | a | 240.54 | 0.77371  | YES | YES |
| 28 | a | 260.93 | 0.55345  | YES | YES |
| 29 | a | 280.59 | 0.60115  | YES | YES |
| 30 | a | 291.71 | 0.57093  | YES | YES |
| 31 | a | 320.94 | 39.44566 | YES | YES |
| 32 | a | 358.15 | 1.90390  | YES | YES |
| 33 | a | 382.50 | 3.39938  | YES | YES |
| 34 | a | 397.47 | 9.23041  | YES | YES |
| 35 | a | 403.54 | 6.39425  | YES | YES |
| 36 | a | 417.84 | 10.02122 | YES | YES |
| 37 | a | 429.45 | 1.95527  | YES | YES |
| 38 | a | 446.92 | 4.61272  | YES | YES |
| 39 | a | 456.06 | 1.37970  | YES | YES |
| 40 | a | 456.24 | 8.85877  | YES | YES |
| 41 | a | 473.87 | 3.19751  | YES | YES |
| 42 | a | 485.82 | 2.00936  | YES | YES |
| 43 | a | 491.78 | 5.65688  | YES | YES |
| 44 | a | 496.06 | 1.61189  | YES | YES |
| 45 | a | 501.48 | 5.88190  | YES | YES |
| 46 | a | 515.47 | 9.01132  | YES | YES |
| 47 | a | 535.60 | 26.33736 | YES | YES |
| 48 | a | 548.45 | 5.41518  | YES | YES |
| 49 | a | 556.91 | 3.03587  | YES | YES |
| 50 | a | 561.76 | 8.27135  | YES | YES |

**2bg'**

SCF Energy (au) BP86/SV(P) -2614.327168892  
 SCF Energy (au) PBE0/def2-TZVPP -2613.947026262  
 SCF Energy (au) PBE0/def2-TZVPP -2613.9542738044 (Toluene Correction)  
 Zero Point Energy (au) 0.2946089  
 Chemical Potential (kJ mol<sup>-1</sup>) 615.65  
 Dispersion Correction (au) PBE0/def2-TZVPP -0.06779443

## xyz coordinates

44

|    |            |            |            |
|----|------------|------------|------------|
| Mn | 1.2573837  | 2.1963969  | 0.4486841  |
| C  | 1.3531009  | 2.5665551  | 2.2135486  |
| C  | 3.0245241  | 1.9082488  | 0.3486739  |
| C  | 1.4107084  | 3.9540834  | 0.0305177  |
| O  | 1.5310693  | 5.0887235  | -0.2159537 |
| O  | 4.1686241  | 1.6910536  | 0.2840612  |
| O  | 1.4228473  | 2.8195984  | 3.3467836  |
| C  | -1.4121583 | 1.0754608  | 1.0929445  |
| C  | -1.6333439 | 3.1754795  | 0.0628049  |
| C  | -3.0302405 | 3.1192127  | 0.1047146  |
| C  | -3.6349183 | 1.9818055  | 0.6689859  |
| C  | -2.8208450 | 0.9593536  | 1.1620807  |
| C  | -0.4584825 | 0.0722705  | 1.5772752  |
| C  | 0.9207441  | 0.3822284  | 1.3919805  |
| C  | 1.8703617  | -0.5376373 | 1.8828441  |
| C  | 1.4759048  | -1.7400836 | 2.4966351  |
| C  | 0.1110156  | -2.0476951 | 2.6480375  |
| C  | -0.8522662 | -1.1404826 | 2.1924812  |
| H  | -1.1195922 | 4.0480721  | -0.3696454 |
| H  | -3.6251749 | 3.9540940  | -0.2963112 |
| H  | -4.7323954 | 1.8944362  | 0.7229211  |
| H  | -3.2707823 | 0.0580324  | 1.6033314  |
| H  | 2.9487511  | -0.3250674 | 1.7901990  |
| H  | 2.2430310  | -2.4437773 | 2.8624149  |
| H  | -0.2003424 | -2.9907485 | 3.1256045  |
| H  | -1.9199092 | -1.3831785 | 2.3217010  |
| N  | -0.8401231 | 2.1925027  | 0.5405406  |
| H  | 1.1982519  | 3.0457681  | -2.4312254 |
| C  | 1.0905043  | 2.2587945  | -1.6825979 |
| C  | 0.9622207  | 1.0325429  | -1.3807726 |
| C  | 0.6868258  | -0.3602690 | -1.6397991 |
| C  | 0.0939562  | -3.0796722 | -2.1473174 |
| C  | 1.3701303  | -2.7079213 | -1.6823147 |
| C  | 1.6628496  | -1.3646825 | -1.4238984 |
| C  | -0.5884926 | -0.7447573 | -2.1270631 |
| C  | -0.8805765 | -2.0905795 | -2.3769088 |
| C  | -0.2506350 | -4.5380390 | -2.3353709 |
| H  | 2.1393655  | -3.4781489 | -1.5177800 |
| H  | 2.6599586  | -1.0783748 | -1.0571861 |
| H  | -1.3505437 | 0.0288712  | -2.3095423 |
| H  | -1.8735156 | -2.3768497 | -2.7570294 |
| F  | 0.8329323  | -5.2770393 | -2.6769699 |
| F  | -1.1879230 | -4.7182721 | -3.2986776 |
| F  | -0.7528007 | -5.0803084 | -1.1934013 |

## \$vibrational spectrum

| # | mode | symmetry | wave number | IR intensity | selection rules |
|---|------|----------|-------------|--------------|-----------------|
| # |      |          | cm**(-1)    | km/mol       | IR RAMAN        |
|   | 1    |          | 0.00        | 0.00000      | - -             |
|   | 2    |          | 0.00        | 0.00000      | - -             |
|   | 3    |          | 0.00        | 0.00000      | - -             |
|   | 4    |          | 0.00        | 0.00000      | - -             |



|    |   |        |          |     |     |
|----|---|--------|----------|-----|-----|
| 5  |   | 0.00   | 0.00000  | -   | -   |
| 6  |   | 0.00   | 0.00000  | -   | -   |
| 7  | a | 14.98  | 0.63488  | YES | YES |
| 8  | a | 24.73  | 0.22465  | YES | YES |
| 9  | a | 43.41  | 0.03090  | YES | YES |
| 10 | a | 47.63  | 0.31629  | YES | YES |
| 11 | a | 49.76  | 0.06600  | YES | YES |
| 12 | a | 61.87  | 0.26106  | YES | YES |
| 13 | a | 67.06  | 0.16659  | YES | YES |
| 14 | a | 82.71  | 0.48376  | YES | YES |
| 15 | a | 89.55  | 0.21796  | YES | YES |
| 16 | a | 94.33  | 0.63058  | YES | YES |
| 17 | a | 98.47  | 0.91191  | YES | YES |
| 18 | a | 103.09 | 0.30264  | YES | YES |
| 19 | a | 109.36 | 0.12101  | YES | YES |
| 20 | a | 118.51 | 0.23764  | YES | YES |
| 21 | a | 126.63 | 0.43690  | YES | YES |
| 22 | a | 159.54 | 0.91062  | YES | YES |
| 23 | a | 184.02 | 0.14154  | YES | YES |
| 24 | a | 193.52 | 0.22917  | YES | YES |
| 25 | a | 210.22 | 0.93389  | YES | YES |
| 26 | a | 217.04 | 0.33259  | YES | YES |
| 27 | a | 235.08 | 1.62107  | YES | YES |
| 28 | a | 264.01 | 0.57022  | YES | YES |
| 29 | a | 282.63 | 0.22548  | YES | YES |
| 30 | a | 298.91 | 0.34890  | YES | YES |
| 31 | a | 316.84 | 22.44646 | YES | YES |
| 32 | a | 358.59 | 1.90104  | YES | YES |
| 33 | a | 384.74 | 1.73648  | YES | YES |
| 34 | a | 399.82 | 0.67506  | YES | YES |
| 35 | a | 402.85 | 10.35245 | YES | YES |
| 36 | a | 417.48 | 3.87632  | YES | YES |
| 37 | a | 430.27 | 2.50205  | YES | YES |
| 38 | a | 438.67 | 2.11925  | YES | YES |
| 39 | a | 457.39 | 1.48654  | YES | YES |
| 40 | a | 465.98 | 1.18742  | YES | YES |
| 41 | a | 470.47 | 2.76870  | YES | YES |
| 42 | a | 485.67 | 6.06921  | YES | YES |
| 43 | a | 489.03 | 1.53234  | YES | YES |
| 44 | a | 497.56 | 4.15803  | YES | YES |
| 45 | a | 502.00 | 11.68884 | YES | YES |
| 46 | a | 521.01 | 4.96104  | YES | YES |
| 47 | a | 528.15 | 14.73262 | YES | YES |
| 48 | a | 556.28 | 1.44075  | YES | YES |
| 49 | a | 558.45 | 2.58503  | YES | YES |
| 50 | a | 566.31 | 2.08477  | YES | YES |

**2bh**

SCF Energy (au) BP86/SV(P) -2505.243220756  
 SCF Energy (au) PBE0/def2-TZVPP -2504.795978988  
 SCF Energy (au) PBE0/def2-TZVPP -2504.8052396137 (Toluene Correction)  
 Zero Point Energy (au) 0.3311844  
 Chemical Potential (kJ mol<sup>-1</sup>) 706.41  
 Dispersion Correction (au) PBE0/def2-TZVPP -0.06732812

xyz coordinates

47

|    |            |            |            |
|----|------------|------------|------------|
| Mn | 1.3037687  | -0.3393686 | 1.5642927  |
| C  | 1.7730387  | 0.1344454  | 3.2388633  |
| C  | 2.9894863  | -0.8119268 | 1.1812376  |
| C  | 1.5546961  | 1.3527175  | 0.9477769  |
| O  | 1.7573715  | 2.4484425  | 0.6023689  |
| O  | 4.0837222  | -1.1330871 | 0.9345719  |
| O  | 2.0847189  | 0.4335773  | 4.3194731  |
| C  | -1.3138688 | -1.0269365 | 2.7797729  |
| C  | -1.4579333 | 1.0217737  | 1.6394196  |
| C  | -2.8103401 | 1.1770946  | 1.9618594  |
| C  | -3.4317669 | 0.1781784  | 2.7313711  |
| C  | -2.6784524 | -0.9257404 | 3.1383201  |
| C  | -0.4265261 | -2.1349737 | 3.1495659  |
| C  | 0.9175908  | -2.0393267 | 2.6841830  |
| C  | 1.8101083  | -3.0749629 | 3.0315404  |
| C  | 1.3873740  | -4.1777526 | 3.7946080  |
| C  | 0.0540064  | -4.2683357 | 4.2389227  |
| C  | -0.8483498 | -3.2481047 | 3.9178066  |
| H  | -0.9341412 | 1.7839641  | 1.0418882  |
| H  | -3.3566609 | 2.0677959  | 1.6155462  |
| H  | -4.4945293 | 0.2610368  | 3.0119807  |
| H  | -3.1425832 | -1.7205382 | 3.7401988  |
| H  | 2.8618655  | -3.0326314 | 2.7023972  |
| H  | 2.1077454  | -4.9742865 | 4.0480141  |
| H  | -0.2779135 | -5.1315735 | 4.8383119  |
| H  | -1.8898483 | -3.3223666 | 4.2718269  |
| N  | -0.7224954 | -0.0414370 | 2.0314249  |
| C  | 0.3817212  | 0.2025585  | -1.6825569 |
| C  | 1.4305623  | 0.9225264  | -2.3113210 |
| C  | 1.1772920  | 1.7120587  | -3.4373745 |
| C  | -0.1314288 | 1.8162960  | -3.9587425 |
| C  | -1.1811545 | 1.1092983  | -3.3339399 |
| C  | -0.9323909 | 0.3121893  | -2.2126835 |
| H  | 2.4533471  | 0.8470271  | -1.9109724 |
| H  | 1.9984106  | 2.2594003  | -3.9235976 |
| C  | -0.4621050 | 2.6479676  | -5.1560877 |
| H  | -2.1956412 | 1.1981318  | -3.7536394 |
| H  | -1.7525776 | -0.2447689 | -1.7327883 |
| C  | 0.6246510  | -0.6587717 | -0.5500646 |
| C  | 0.6522165  | -1.7324185 | 0.1221244  |
| H  | 0.5521967  | -2.8167169 | 0.1840923  |
| O  | 0.6347577  | 3.2637250  | -5.6739877 |
| O  | -1.5811101 | 2.7704014  | -5.6290021 |
| C  | 0.3952956  | 4.0772873  | -6.8291640 |
| H  | 1.3816802  | 4.4905983  | -7.1168170 |
| H  | -0.3167022 | 4.8971929  | -6.5931624 |
| H  | -0.0291043 | 3.4703400  | -7.6578580 |

\$vibrational spectrum

| # | mode | symmetry | wave number | IR intensity | selection rules |
|---|------|----------|-------------|--------------|-----------------|
| # |      |          | cm** (-1)   | km/mol       | IR RAMAN        |
| 1 |      |          | 0.00        | 0.00000      | - -             |

|    |   |        |          |     |     |
|----|---|--------|----------|-----|-----|
| 2  |   | 0.00   | 0.00000  | -   | -   |
| 3  |   | 0.00   | 0.00000  | -   | -   |
| 4  |   | 0.00   | 0.00000  | -   | -   |
| 5  |   | 0.00   | 0.00000  | -   | -   |
| 6  |   | 0.00   | 0.00000  | -   | -   |
| 7  | a | 12.57  | 0.40934  | YES | YES |
| 8  | a | 21.74  | 0.40464  | YES | YES |
| 9  | a | 27.08  | 1.41359  | YES | YES |
| 10 | a | 46.22  | 0.15075  | YES | YES |
| 11 | a | 59.22  | 0.08189  | YES | YES |
| 12 | a | 65.99  | 0.43548  | YES | YES |
| 13 | a | 72.96  | 0.34214  | YES | YES |
| 14 | a | 81.48  | 0.30844  | YES | YES |
| 15 | a | 84.43  | 1.94921  | YES | YES |
| 16 | a | 90.25  | 0.19612  | YES | YES |
| 17 | a | 93.42  | 0.21922  | YES | YES |
| 18 | a | 103.84 | 0.38580  | YES | YES |
| 19 | a | 109.74 | 0.07931  | YES | YES |
| 20 | a | 113.53 | 0.35221  | YES | YES |
| 21 | a | 120.73 | 0.30032  | YES | YES |
| 22 | a | 125.90 | 0.91882  | YES | YES |
| 23 | a | 147.48 | 1.71613  | YES | YES |
| 24 | a | 152.66 | 4.50491  | YES | YES |
| 25 | a | 177.22 | 1.29846  | YES | YES |
| 26 | a | 188.89 | 1.54772  | YES | YES |
| 27 | a | 209.11 | 1.48568  | YES | YES |
| 28 | a | 234.98 | 0.55588  | YES | YES |
| 29 | a | 245.53 | 4.50037  | YES | YES |
| 30 | a | 262.35 | 0.79599  | YES | YES |
| 31 | a | 283.14 | 0.95130  | YES | YES |
| 32 | a | 311.13 | 27.87040 | YES | YES |
| 33 | a | 327.93 | 11.67023 | YES | YES |
| 34 | a | 350.73 | 23.39475 | YES | YES |
| 35 | a | 359.49 | 5.82019  | YES | YES |
| 36 | a | 404.30 | 0.02491  | YES | YES |
| 37 | a | 416.19 | 3.06781  | YES | YES |
| 38 | a | 426.53 | 2.24478  | YES | YES |
| 39 | a | 440.49 | 1.77115  | YES | YES |
| 40 | a | 449.10 | 1.71625  | YES | YES |
| 41 | a | 455.95 | 1.03867  | YES | YES |
| 42 | a | 457.74 | 24.14923 | YES | YES |
| 43 | a | 473.30 | 2.85469  | YES | YES |
| 44 | a | 485.96 | 1.78627  | YES | YES |
| 45 | a | 491.68 | 6.24711  | YES | YES |
| 46 | a | 501.47 | 4.97107  | YES | YES |
| 47 | a | 514.16 | 12.33024 | YES | YES |
| 48 | a | 525.09 | 28.57055 | YES | YES |
| 49 | a | 538.51 | 13.49851 | YES | YES |
| 50 | a | 549.73 | 5.41364  | YES | YES |

**2bh'**

|                                            |                                       |
|--------------------------------------------|---------------------------------------|
| SCF Energy (au) BP86/SV(P)                 | -2505.241127470                       |
| SCF Energy (au) PBE0/def2-TZVPP            | -2504.793700599                       |
| SCF Energy (au) PBE0/def2-TZVPP            | -2504.8031262880 (Toluene Correction) |
| Zero Point Energy (au)                     | 0.3312181                             |
| Chemical Potential (kJ mol <sup>-1</sup> ) | 706.73                                |
| Dispersion Correction (au) PBE0/def2-TZVPP | -0.06985329                           |

xyz coordinates

47

|    |            |            |            |
|----|------------|------------|------------|
| Mn | 1.3525788  | 2.6404515  | 0.6752257  |
| C  | 1.4623236  | 3.0505351  | 2.4306510  |
| C  | 3.1180559  | 2.3426824  | 0.5704972  |
| C  | 1.5125479  | 4.3868787  | 0.2159357  |
| O  | 1.6366598  | 5.5146486  | -0.0592851 |
| O  | 4.2612268  | 2.1210474  | 0.5048932  |
| O  | 1.5409259  | 3.3295203  | 3.5572676  |
| C  | -1.3186215 | 1.5605827  | 1.3798475  |
| C  | -1.5332292 | 3.6333060  | 0.2947321  |
| C  | -2.9296576 | 3.5961481  | 0.3631720  |
| C  | -3.5376511 | 2.4833359  | 0.9711769  |
| C  | -2.7271811 | 1.4647459  | 1.4779097  |
| C  | -0.3682498 | 0.5597142  | 1.8746643  |
| C  | 1.0111152  | 0.8482912  | 1.6580389  |
| C  | 1.9583656  | -0.0697541 | 2.1565151  |
| C  | 1.5609619  | -1.2495664 | 2.8106551  |
| C  | 0.1954744  | -1.5350771 | 2.9966655  |
| C  | -0.7651302 | -0.6299190 | 2.5318795  |
| H  | -1.0168526 | 4.4866881  | -0.1716124 |
| H  | -3.5214392 | 4.4269324  | -0.0508772 |
| H  | -4.6349005 | 2.4121097  | 1.0484499  |
| H  | -3.1798632 | 0.5823249  | 1.9532209  |
| H  | 3.0373138  | 0.1269373  | 2.0393990  |
| H  | 2.3263312  | -1.9524765 | 3.1813687  |
| H  | -0.1177088 | -2.4595193 | 3.5083338  |
| H  | -1.8332349 | -0.8548593 | 2.6874203  |
| N  | -0.7433560 | 2.6546985  | 0.7866600  |
| H  | 1.2544836  | 3.4323463  | -2.2177885 |
| C  | 1.1606076  | 2.6610036  | -1.4510573 |
| C  | 1.0487005  | 1.4378508  | -1.1274324 |
| C  | 0.8093861  | 0.0385225  | -1.3890164 |
| C  | 0.3167967  | -2.6897427 | -1.9836557 |
| C  | 1.5686989  | -2.2825122 | -1.4724613 |
| C  | 1.8129129  | -0.9403944 | -1.1709397 |
| C  | -0.4473827 | -0.3759304 | -1.9026725 |
| C  | -0.6896091 | -1.7225133 | -2.1952754 |
| C  | 0.1185604  | -4.1403013 | -2.2799951 |
| H  | 2.3449415  | -3.0478617 | -1.3160285 |
| H  | 2.7914949  | -0.6294426 | -0.7751307 |
| H  | -1.2314324 | 0.3781846  | -2.0747522 |
| H  | -1.6651795 | -2.0356814 | -2.5961769 |
| O  | -1.1267215 | -4.4022476 | -2.7663730 |
| O  | 0.9619567  | -5.0071900 | -2.1138995 |
| C  | -1.3865221 | -5.7761092 | -3.0780381 |
| H  | -0.6831782 | -6.1448367 | -3.8557727 |
| H  | -2.4287497 | -5.8093542 | -3.4516302 |
| H  | -1.2765696 | -6.4141971 | -2.1747089 |

\$vibrational spectrum

| #  | mode | symmetry | wave number<br>cm**(-1) | IR intensity<br>km/mol | selection rules |       |
|----|------|----------|-------------------------|------------------------|-----------------|-------|
| #  |      |          |                         |                        | IR              | RAMAN |
| 1  |      |          | 0.00                    | 0.00000                | -               | -     |
| 2  |      |          | 0.00                    | 0.00000                | -               | -     |
| 3  |      |          | 0.00                    | 0.00000                | -               | -     |
| 4  |      |          | 0.00                    | 0.00000                | -               | -     |
| 5  |      |          | 0.00                    | 0.00000                | -               | -     |
| 6  |      |          | 0.00                    | 0.00000                | -               | -     |
| 7  |      | a        | 12.77                   | 0.48046                | YES             | YES   |
| 8  |      | a        | 16.49                   | 0.07359                | YES             | YES   |
| 9  |      | a        | 34.31                   | 0.26905                | YES             | YES   |
| 10 |      | a        | 48.86                   | 0.02328                | YES             | YES   |
| 11 |      | a        | 55.73                   | 1.09007                | YES             | YES   |
| 12 |      | a        | 63.10                   | 0.70619                | YES             | YES   |
| 13 |      | a        | 67.93                   | 0.07690                | YES             | YES   |
| 14 |      | a        | 82.43                   | 0.35489                | YES             | YES   |
| 15 |      | a        | 88.48                   | 0.45152                | YES             | YES   |
| 16 |      | a        | 90.74                   | 0.41964                | YES             | YES   |
| 17 |      | a        | 96.71                   | 0.40586                | YES             | YES   |
| 18 |      | a        | 99.94                   | 0.43111                | YES             | YES   |
| 19 |      | a        | 107.38                  | 0.34149                | YES             | YES   |
| 20 |      | a        | 114.78                  | 0.64331                | YES             | YES   |
| 21 |      | a        | 116.87                  | 0.28711                | YES             | YES   |
| 22 |      | a        | 123.33                  | 0.47748                | YES             | YES   |
| 23 |      | a        | 151.43                  | 2.54072                | YES             | YES   |
| 24 |      | a        | 158.10                  | 1.69009                | YES             | YES   |
| 25 |      | a        | 184.44                  | 0.56521                | YES             | YES   |
| 26 |      | a        | 191.79                  | 0.56599                | YES             | YES   |
| 27 |      | a        | 216.79                  | 0.56283                | YES             | YES   |
| 28 |      | a        | 226.23                  | 2.33570                | YES             | YES   |
| 29 |      | a        | 241.58                  | 0.48368                | YES             | YES   |
| 30 |      | a        | 265.96                  | 0.88216                | YES             | YES   |
| 31 |      | a        | 283.59                  | 0.15454                | YES             | YES   |
| 32 |      | a        | 310.54                  | 23.14858               | YES             | YES   |
| 33 |      | a        | 326.65                  | 1.88924                | YES             | YES   |
| 34 |      | a        | 357.04                  | 8.70207                | YES             | YES   |
| 35 |      | a        | 361.20                  | 13.57125               | YES             | YES   |
| 36 |      | a        | 403.29                  | 0.05072                | YES             | YES   |
| 37 |      | a        | 416.59                  | 9.13494                | YES             | YES   |
| 38 |      | a        | 422.54                  | 1.21557                | YES             | YES   |
| 39 |      | a        | 434.43                  | 5.46699                | YES             | YES   |
| 40 |      | a        | 457.11                  | 2.85989                | YES             | YES   |
| 41 |      | a        | 458.87                  | 3.97714                | YES             | YES   |
| 42 |      | a        | 466.11                  | 1.90131                | YES             | YES   |
| 43 |      | a        | 470.44                  | 2.27312                | YES             | YES   |
| 44 |      | a        | 486.24                  | 6.29781                | YES             | YES   |
| 45 |      | a        | 489.75                  | 3.99537                | YES             | YES   |
| 46 |      | a        | 500.49                  | 2.36214                | YES             | YES   |
| 47 |      | a        | 508.50                  | 10.92025               | YES             | YES   |
| 48 |      | a        | 526.16                  | 19.44830               | YES             | YES   |
| 49 |      | a        | 534.84                  | 2.05306                | YES             | YES   |
| 50 |      | a        | 556.88                  | 1.91812                | YES             | YES   |

**2bi**

|                                            |                                       |
|--------------------------------------------|---------------------------------------|
| SCF Energy (au) BP86/SV(P)                 | -2508.412127961                       |
| SCF Energy (au) PBE0/def2-TZVPP            | -2507.929859714                       |
| SCF Energy (au) PBE0/def2-TZVPP            | -2507.9381342801 (Toluene Correction) |
| Zero Point Energy (au)                     | 0.3689319                             |
| Chemical Potential (kJ mol <sup>-1</sup> ) | 802.70                                |
| Dispersion Correction (au) PBE0/def2-TZVPP | -0.08008127                           |

xyz coordinates

51

|    |            |            |            |
|----|------------|------------|------------|
| Mn | 1.2130299  | 1.1283460  | 0.7677901  |
| C  | 1.7035251  | 1.6930919  | 2.4075242  |
| C  | 2.9060224  | 0.7196004  | 0.3489977  |
| C  | 1.3402844  | 2.8290054  | 0.1489828  |
| O  | 1.4529387  | 3.9427431  | -0.1788935 |
| O  | 4.0048144  | 0.4309846  | 0.0798274  |
| O  | 2.0398828  | 2.0723864  | 3.4558032  |
| C  | -1.3170678 | 0.3238844  | 2.0891977  |
| C  | -1.6520221 | 2.2439038  | 0.7770437  |
| C  | -3.0119197 | 2.3031509  | 1.0993219  |
| C  | -3.5366106 | 1.3238318  | 1.9611220  |
| C  | -2.6842758 | 0.3326735  | 2.4536215  |
| C  | -0.3319129 | -0.6649198 | 2.5369774  |
| C  | 0.9908736  | -0.4985782 | 2.0326552  |
| C  | 1.9782768  | -1.4050739 | 2.4707026  |
| C  | 1.6657888  | -2.4618788 | 3.3435286  |
| C  | 0.3502888  | -2.6308128 | 3.8149470  |
| C  | -0.6441053 | -1.7318737 | 3.4136953  |
| H  | -1.2015770 | 2.9926609  | 0.1072473  |
| H  | -3.6387367 | 3.1062909  | 0.6823404  |
| H  | -4.6015919 | 1.3339608  | 2.2454455  |
| H  | -3.0718391 | -0.4473817 | 3.1247977  |
| H  | 3.0216985  | -1.2941308 | 2.1310262  |
| H  | 2.4590368  | -3.1596738 | 3.6619684  |
| H  | 0.1037007  | -3.4586847 | 4.4994147  |
| H  | -1.6710583 | -1.8636835 | 3.7923921  |
| N  | -0.8207181 | 1.2920030  | 1.2544310  |
| C  | 0.4207025  | 1.6500918  | -2.5074411 |
| C  | 1.4867883  | 2.4143679  | -3.0457378 |
| C  | 1.3169154  | 3.1360790  | -4.2354252 |
| C  | 0.0808729  | 3.1232991  | -4.9064612 |
| C  | -0.9868061 | 2.3750914  | -4.3801494 |
| C  | -0.8224232 | 1.6450879  | -3.1936522 |
| H  | 2.4588884  | 2.4257396  | -2.5283637 |
| H  | 2.1609446  | 3.7168114  | -4.6429110 |
| H  | -0.0496867 | 3.6969551  | -5.8387960 |
| H  | -1.9592198 | 2.3570001  | -4.9000822 |
| H  | -1.6581221 | 1.0554551  | -2.7841453 |
| C  | 0.5779432  | 0.8415585  | -1.3142645 |
| C  | 0.5270337  | -0.2875373 | -0.7223688 |
| C  | 0.2609239  | -1.7109594 | -0.7565203 |
| C  | -0.2803551 | -4.4856857 | -0.9456125 |
| C  | 1.0329260  | -4.0329921 | -0.7238185 |
| C  | 1.3037063  | -2.6616307 | -0.6212917 |
| C  | -1.0599086 | -2.1783404 | -0.9771882 |
| C  | -1.3244028 | -3.5529628 | -1.0703561 |
| H  | -0.4891628 | -5.5657011 | -1.0214352 |
| H  | 1.8581302  | -4.7581454 | -0.6286880 |
| H  | 2.3329935  | -2.3096110 | -0.4541603 |
| H  | -1.8783950 | -1.4475910 | -1.0773034 |
| H  | -2.3570132 | -3.8982063 | -1.2457354 |

\$vibrational spectrum

| #  | mode | symmetry | wave number<br>cm**(-1) | IR intensity<br>km/mol | selection rules |       |
|----|------|----------|-------------------------|------------------------|-----------------|-------|
| #  |      |          |                         |                        | IR              | RAMAN |
| 1  |      |          | 0.00                    | 0.00000                | -               | -     |
| 2  |      |          | 0.00                    | 0.00000                | -               | -     |
| 3  |      |          | 0.00                    | 0.00000                | -               | -     |
| 4  |      |          | 0.00                    | 0.00000                | -               | -     |
| 5  |      |          | 0.00                    | 0.00000                | -               | -     |
| 6  |      |          | 0.00                    | 0.00000                | -               | -     |
| 7  |      | a        | 11.30                   | 0.22300                | YES             | YES   |
| 8  |      | a        | 22.06                   | 0.05960                | YES             | YES   |
| 9  |      | a        | 26.37                   | 0.05122                | YES             | YES   |
| 10 |      | a        | 29.53                   | 0.26518                | YES             | YES   |
| 11 |      | a        | 42.86                   | 0.19185                | YES             | YES   |
| 12 |      | a        | 47.27                   | 0.19769                | YES             | YES   |
| 13 |      | a        | 58.61                   | 0.22167                | YES             | YES   |
| 14 |      | a        | 69.78                   | 0.25509                | YES             | YES   |
| 15 |      | a        | 77.43                   | 0.33119                | YES             | YES   |
| 16 |      | a        | 86.68                   | 0.52791                | YES             | YES   |
| 17 |      | a        | 93.21                   | 0.55682                | YES             | YES   |
| 18 |      | a        | 99.48                   | 0.43536                | YES             | YES   |
| 19 |      | a        | 110.27                  | 0.03955                | YES             | YES   |
| 20 |      | a        | 112.40                  | 0.07220                | YES             | YES   |
| 21 |      | a        | 118.74                  | 0.41670                | YES             | YES   |
| 22 |      | a        | 128.61                  | 0.09602                | YES             | YES   |
| 23 |      | a        | 155.09                  | 0.23330                | YES             | YES   |
| 24 |      | a        | 172.92                  | 0.64525                | YES             | YES   |
| 25 |      | a        | 184.50                  | 2.96286                | YES             | YES   |
| 26 |      | a        | 190.36                  | 1.46917                | YES             | YES   |
| 27 |      | a        | 217.37                  | 2.47697                | YES             | YES   |
| 28 |      | a        | 227.91                  | 3.62925                | YES             | YES   |
| 29 |      | a        | 246.59                  | 2.66370                | YES             | YES   |
| 30 |      | a        | 263.96                  | 0.15492                | YES             | YES   |
| 31 |      | a        | 285.78                  | 0.04935                | YES             | YES   |
| 32 |      | a        | 357.97                  | 2.19617                | YES             | YES   |
| 33 |      | a        | 380.42                  | 15.73501               | YES             | YES   |
| 34 |      | a        | 396.16                  | 3.45386                | YES             | YES   |
| 35 |      | a        | 400.56                  | 0.70936                | YES             | YES   |
| 36 |      | a        | 402.72                  | 0.46689                | YES             | YES   |
| 37 |      | a        | 419.58                  | 7.53622                | YES             | YES   |
| 38 |      | a        | 434.67                  | 7.51619                | YES             | YES   |
| 39 |      | a        | 447.78                  | 18.79443               | YES             | YES   |
| 40 |      | a        | 455.69                  | 1.81735                | YES             | YES   |
| 41 |      | a        | 466.54                  | 3.39152                | YES             | YES   |
| 42 |      | a        | 473.94                  | 4.02064                | YES             | YES   |
| 43 |      | a        | 487.42                  | 1.59525                | YES             | YES   |
| 44 |      | a        | 494.62                  | 8.89332                | YES             | YES   |
| 45 |      | a        | 500.57                  | 40.66585               | YES             | YES   |
| 46 |      | a        | 510.17                  | 18.38623               | YES             | YES   |
| 47 |      | a        | 532.27                  | 6.91702                | YES             | YES   |
| 48 |      | a        | 541.86                  | 10.49425               | YES             | YES   |
| 49 |      | a        | 546.65                  | 14.41346               | YES             | YES   |
| 50 |      | a        | 556.32                  | 1.85781                | YES             | YES   |

**2bj**

|                                            |                                       |
|--------------------------------------------|---------------------------------------|
| SCF Energy (au) BP86/SV(P)                 | -2360.882425609                       |
| SCF Energy (au) PBE0/def2-TZVPP            | -2360.449384567                       |
| SCF Energy (au) PBE0/def2-TZVPP            | -2360.4555509522 (Toluene Correction) |
| Zero Point Energy (au)                     | 0.4312242                             |
| Chemical Potential (kJ mol <sup>-1</sup> ) | 961.18                                |
| Dispersion Correction (au) PBE0/def2-TZVPP | -0.07158498                           |

xyz coordinates

55

|    |            |            |            |
|----|------------|------------|------------|
| Mn | 0.9063604  | 1.1654989  | 1.2513929  |
| C  | 1.4579883  | 1.7774516  | 2.8523784  |
| C  | 2.5778462  | 0.7095393  | 0.8022817  |
| C  | 1.0471178  | 2.8159490  | 0.5310960  |
| O  | 1.1618663  | 3.9010142  | 0.1081574  |
| O  | 3.6636985  | 0.3933969  | 0.5122264  |
| O  | 1.8356109  | 2.1749044  | 3.8800338  |
| C  | -1.6068028 | 0.4517863  | 2.6622762  |
| C  | -1.9209358 | 2.3794980  | 1.3603483  |
| C  | -3.2626150 | 2.4940528  | 1.7393193  |
| C  | -3.7889360 | 1.5380768  | 2.6254461  |
| C  | -2.9554606 | 0.5154195  | 3.0851400  |
| C  | -0.6429715 | -0.5760285 | 3.0695296  |
| C  | 0.6614645  | -0.4621593 | 2.5021412  |
| C  | 1.6210372  | -1.4248806 | 2.8842198  |
| C  | 1.3013794  | -2.4730750 | 3.7653559  |
| C  | 0.0050144  | -2.5810691 | 4.3047530  |
| C  | -0.9629187 | -1.6313920 | 3.9585385  |
| H  | -1.4682090 | 3.1144091  | 0.6768561  |
| H  | -3.8740846 | 3.3216238  | 1.3478960  |
| H  | -4.8395069 | 1.5912199  | 2.9550566  |
| H  | -3.3440641 | -0.2459782 | 3.7769777  |
| H  | 2.6490455  | -1.3666327 | 2.4885330  |
| H  | 2.0741428  | -3.2123366 | 4.0379284  |
| H  | -0.2459702 | -3.3996086 | 4.9989108  |
| H  | -1.9742205 | -1.7143196 | 4.3901050  |
| N  | -1.1078899 | 1.3957218  | 1.8015117  |
| C  | 0.1463747  | 1.6673289  | -2.0651955 |
| C  | 0.2249000  | 0.8325196  | -0.8403622 |
| C  | 0.1834660  | -0.2677396 | -0.2129212 |
| C  | -0.0838458 | -1.7237446 | -0.1591217 |
| H  | 0.8271177  | -2.2503474 | 0.2092813  |
| C  | -0.5210201 | -2.3071547 | -1.5199947 |
| H  | -0.8611075 | -1.9334766 | 0.6115687  |
| C  | -0.7974492 | -3.8183739 | -1.4622855 |
| H  | 0.2702275  | -2.0995950 | -2.2773694 |
| H  | -1.4349885 | -1.7730181 | -1.8707999 |
| C  | -1.2269150 | -4.4107003 | -2.8113143 |
| H  | -1.5858337 | -4.0181631 | -0.6987829 |
| H  | 0.1167171  | -4.3439965 | -1.0984921 |
| H  | -1.4183266 | -5.5036238 | -2.7325177 |
| H  | -0.4421516 | -4.2618467 | -3.5870862 |
| H  | -2.1600508 | -3.9322296 | -3.1856164 |
| C  | 1.5045309  | 1.8713812  | -2.7748815 |
| H  | -0.5587833 | 1.1609294  | -2.7667554 |
| H  | -0.2988621 | 2.6637806  | -1.8441008 |
| H  | 2.2194946  | 2.3506684  | -2.0687930 |
| C  | 1.3891197  | 2.7256069  | -4.0470473 |
| H  | 1.9342444  | 0.8736357  | -3.0233639 |
| C  | 2.7307898  | 2.9294680  | -4.7625803 |
| H  | 0.9547438  | 3.7182795  | -3.7817327 |
| H  | 0.6615254  | 2.2502414  | -4.7469750 |



|   |           |           |            |
|---|-----------|-----------|------------|
| H | 3.4687910 | 3.4359572 | -4.1005359 |
| H | 2.6138692 | 3.5544444 | -5.6753434 |
| H | 3.1754356 | 1.9576868 | -5.0752911 |

\$vibrational spectrum

| #  | mode | symmetry | wave number<br>cm**(-1) | IR intensity<br>km/mol | selection rules |       |
|----|------|----------|-------------------------|------------------------|-----------------|-------|
| #  |      |          |                         |                        | IR              | RAMAN |
| 1  |      |          | 0.00                    | 0.00000                | -               | -     |
| 2  |      |          | 0.00                    | 0.00000                | -               | -     |
| 3  |      |          | 0.00                    | 0.00000                | -               | -     |
| 4  |      |          | 0.00                    | 0.00000                | -               | -     |
| 5  |      |          | 0.00                    | 0.00000                | -               | -     |
| 6  |      |          | 0.00                    | 0.00000                | -               | -     |
| 7  |      | a        | 11.02                   | 0.17245                | YES             | YES   |
| 8  |      | a        | 25.23                   | 0.14043                | YES             | YES   |
| 9  |      | a        | 27.66                   | 0.17493                | YES             | YES   |
| 10 |      | a        | 40.79                   | 0.02801                | YES             | YES   |
| 11 |      | a        | 48.69                   | 0.22577                | YES             | YES   |
| 12 |      | a        | 55.13                   | 0.08372                | YES             | YES   |
| 13 |      | a        | 61.84                   | 0.07792                | YES             | YES   |
| 14 |      | a        | 63.89                   | 0.05944                | YES             | YES   |
| 15 |      | a        | 73.91                   | 0.05961                | YES             | YES   |
| 16 |      | a        | 84.70                   | 0.87413                | YES             | YES   |
| 17 |      | a        | 86.28                   | 0.56138                | YES             | YES   |
| 18 |      | a        | 91.79                   | 0.23567                | YES             | YES   |
| 19 |      | a        | 101.15                  | 0.08415                | YES             | YES   |
| 20 |      | a        | 105.03                  | 0.28350                | YES             | YES   |
| 21 |      | a        | 105.92                  | 0.16061                | YES             | YES   |
| 22 |      | a        | 115.10                  | 0.13407                | YES             | YES   |
| 23 |      | a        | 123.42                  | 0.37657                | YES             | YES   |
| 24 |      | a        | 127.51                  | 0.13969                | YES             | YES   |
| 25 |      | a        | 134.65                  | 0.14269                | YES             | YES   |
| 26 |      | a        | 167.09                  | 1.19662                | YES             | YES   |
| 27 |      | a        | 185.09                  | 1.62408                | YES             | YES   |
| 28 |      | a        | 192.02                  | 1.72794                | YES             | YES   |
| 29 |      | a        | 207.29                  | 0.25131                | YES             | YES   |
| 30 |      | a        | 212.04                  | 0.94338                | YES             | YES   |
| 31 |      | a        | 230.67                  | 0.44577                | YES             | YES   |
| 32 |      | a        | 245.13                  | 0.09361                | YES             | YES   |
| 33 |      | a        | 251.99                  | 0.09030                | YES             | YES   |
| 34 |      | a        | 257.44                  | 0.71190                | YES             | YES   |
| 35 |      | a        | 284.92                  | 0.04044                | YES             | YES   |
| 36 |      | a        | 287.84                  | 1.99290                | YES             | YES   |
| 37 |      | a        | 342.65                  | 1.35575                | YES             | YES   |
| 38 |      | a        | 351.28                  | 10.47142               | YES             | YES   |
| 39 |      | a        | 358.57                  | 2.50273                | YES             | YES   |
| 40 |      | a        | 377.52                  | 7.71193                | YES             | YES   |
| 41 |      | a        | 413.42                  | 0.40739                | YES             | YES   |
| 42 |      | a        | 417.98                  | 3.93799                | YES             | YES   |
| 43 |      | a        | 436.39                  | 0.17315                | YES             | YES   |
| 44 |      | a        | 456.70                  | 1.43676                | YES             | YES   |
| 45 |      | a        | 459.24                  | 3.11548                | YES             | YES   |
| 46 |      | a        | 472.34                  | 2.92312                | YES             | YES   |
| 47 |      | a        | 487.20                  | 4.26455                | YES             | YES   |
| 48 |      | a        | 493.34                  | 0.83376                | YES             | YES   |
| 49 |      | a        | 504.92                  | 1.30037                | YES             | YES   |
| 50 |      | a        | 511.34                  | 0.08654                | YES             | YES   |

**2ca**

|                                            |                                       |
|--------------------------------------------|---------------------------------------|
| SCF Energy (au) BP86/SV(P)                 | -2678.190493143                       |
| SCF Energy (au) PBE0/def2-TZVPP            | -2677.706850638                       |
| SCF Energy (au) PBE0/def2-TZVPP            | -2677.7183769724 (Toluene Correction) |
| Zero Point Energy (au)                     | 0.4157036                             |
| Chemical Potential (kJ mol <sup>-1</sup> ) | 911.24                                |
| Dispersion Correction (au) PBE0/def2-TZVPP | -0.08425883                           |

xyz coordinates

57

|    |            |            |            |
|----|------------|------------|------------|
| Mn | 0.7905336  | 1.5285988  | -0.7423591 |
| C  | 1.3273161  | 1.7047316  | 0.9650669  |
| C  | 2.4456986  | 0.9692036  | -1.2253026 |
| C  | 1.2218679  | 3.2420649  | -1.1491495 |
| O  | 1.5213430  | 4.3518560  | -1.3572636 |
| O  | 3.5159990  | 0.7182341  | -1.6022172 |
| O  | 1.6847253  | 1.7901848  | 2.0709940  |
| C  | -1.9172557 | 1.0193716  | 0.3528721  |
| C  | -1.7957953 | 3.1873913  | -0.5318246 |
| C  | -3.1303060 | 3.4572047  | -0.2048991 |
| C  | -3.8817482 | 2.4552653  | 0.4318321  |
| C  | -3.2678746 | 1.2300441  | 0.7097169  |
| C  | -1.1664315 | -0.2164499 | 0.5949210  |
| C  | 0.1556683  | -0.2054871 | 0.1489748  |
| C  | 0.9967886  | -1.3733598 | 0.3826172  |
| N  | 0.3757456  | -2.4857002 | 1.0476719  |
| C  | -0.9469338 | -2.4827290 | 1.4670707  |
| C  | -1.7248080 | -1.3636875 | 1.2467454  |
| H  | -1.1767336 | 3.9503746  | -1.0275713 |
| H  | -3.5624970 | 4.4401795  | -0.4476092 |
| H  | -4.9345600 | 2.6283193  | 0.7088086  |
| H  | -3.8313851 | 0.4263969  | 1.2057034  |
| O  | 2.1917129  | -1.4589280 | 0.0571630  |
| C  | -1.4998894 | -3.7096034 | 2.1450369  |
| H  | -2.7692106 | -1.3801603 | 1.5893197  |
| N  | -1.1933158 | 2.0084472  | -0.2649113 |
| C  | -0.2026858 | 2.5515868  | -3.8505661 |
| C  | 0.8330593  | 3.3355169  | -4.4204606 |
| C  | 0.5392223  | 4.3032118  | -5.3907774 |
| C  | -0.7879149 | 4.5174378  | -5.8053061 |
| C  | -1.8237181 | 3.7496072  | -5.2446583 |
| C  | -1.5387683 | 2.7755920  | -4.2763370 |
| H  | 1.8734261  | 3.1710737  | -4.0999638 |
| H  | 1.3574875  | 4.8993708  | -5.8272260 |
| H  | -1.0141382 | 5.2828874  | -6.5658297 |
| H  | -2.8665484 | 3.9080653  | -5.5667153 |
| H  | -2.3482659 | 2.1684774  | -3.8410303 |
| C  | 0.0717449  | 1.5172662  | -2.8807799 |
| C  | 0.0979632  | 0.3619270  | -2.3637414 |
| H  | -0.0035840 | -0.7198586 | -2.4531376 |
| H  | -1.5173194 | -4.5908682 | 1.4635559  |
| H  | -2.5420262 | -3.5195711 | 2.4730421  |
| H  | -0.9011095 | -3.9959174 | 3.0374664  |
| C  | 1.2519414  | -3.6507605 | 1.2827453  |
| C  | 1.8231970  | -3.7377665 | 2.6904001  |
| H  | 2.0819419  | -3.5235044 | 0.5560890  |
| H  | 0.7002069  | -4.5790914 | 1.0321895  |
| C  | 2.9472178  | -3.9354974 | 5.2820534  |
| C  | 2.3163704  | -5.0476178 | 4.7009390  |
| C  | 1.7566335  | -4.9455809 | 3.4153647  |
| C  | 2.4693801  | -2.6285701 | 3.2789892  |
| C  | 3.0218256  | -2.7272481 | 4.5658847  |

|   |           |            |           |
|---|-----------|------------|-----------|
| H | 3.3831164 | -4.0094872 | 6.2921715 |
| H | 2.2541763 | -6.0011177 | 5.2516107 |
| H | 1.2615839 | -5.8247528 | 2.9659924 |
| H | 2.5537513 | -1.6850764 | 2.7160355 |
| H | 3.5231786 | -1.8514973 | 5.0105932 |

\$vibrational spectrum

| #  | mode | symmetry | wave number<br>cm**(-1) | IR intensity<br>km/mol | selection rules |       |
|----|------|----------|-------------------------|------------------------|-----------------|-------|
| #  |      |          |                         |                        | IR              | RAMAN |
| 1  |      |          | 0.00                    | 0.00000                | -               | -     |
| 2  |      |          | 0.00                    | 0.00000                | -               | -     |
| 3  |      |          | 0.00                    | 0.00000                | -               | -     |
| 4  |      |          | 0.00                    | 0.00000                | -               | -     |
| 5  |      |          | 0.00                    | 0.00000                | -               | -     |
| 6  |      |          | 0.00                    | 0.00000                | -               | -     |
| 7  |      | a        | 11.75                   | 0.05816                | YES             | YES   |
| 8  |      | a        | 14.17                   | 0.44665                | YES             | YES   |
| 9  |      | a        | 18.27                   | 0.27503                | YES             | YES   |
| 10 |      | a        | 25.24                   | 0.43345                | YES             | YES   |
| 11 |      | a        | 28.41                   | 0.17720                | YES             | YES   |
| 12 |      | a        | 33.39                   | 0.16288                | YES             | YES   |
| 13 |      | a        | 52.56                   | 2.02624                | YES             | YES   |
| 14 |      | a        | 61.46                   | 0.06639                | YES             | YES   |
| 15 |      | a        | 70.66                   | 0.31006                | YES             | YES   |
| 16 |      | a        | 77.87                   | 0.45878                | YES             | YES   |
| 17 |      | a        | 82.82                   | 0.65931                | YES             | YES   |
| 18 |      | a        | 91.77                   | 2.72653                | YES             | YES   |
| 19 |      | a        | 98.13                   | 0.53621                | YES             | YES   |
| 20 |      | a        | 101.45                  | 0.06260                | YES             | YES   |
| 21 |      | a        | 111.21                  | 0.12231                | YES             | YES   |
| 22 |      | a        | 118.61                  | 0.89381                | YES             | YES   |
| 23 |      | a        | 121.91                  | 1.04289                | YES             | YES   |
| 24 |      | a        | 152.08                  | 0.91687                | YES             | YES   |
| 25 |      | a        | 152.54                  | 0.72509                | YES             | YES   |
| 26 |      | a        | 160.88                  | 4.90822                | YES             | YES   |
| 27 |      | a        | 183.22                  | 0.71152                | YES             | YES   |
| 28 |      | a        | 194.04                  | 1.37194                | YES             | YES   |
| 29 |      | a        | 208.22                  | 1.82511                | YES             | YES   |
| 30 |      | a        | 222.93                  | 0.28827                | YES             | YES   |
| 31 |      | a        | 244.70                  | 1.18420                | YES             | YES   |
| 32 |      | a        | 247.38                  | 0.73847                | YES             | YES   |
| 33 |      | a        | 261.67                  | 1.67246                | YES             | YES   |
| 34 |      | a        | 279.46                  | 0.50349                | YES             | YES   |
| 35 |      | a        | 311.39                  | 3.41575                | YES             | YES   |
| 36 |      | a        | 323.37                  | 15.15492               | YES             | YES   |
| 37 |      | a        | 333.50                  | 13.91151               | YES             | YES   |
| 38 |      | a        | 369.01                  | 6.10197                | YES             | YES   |
| 39 |      | a        | 388.19                  | 1.01913                | YES             | YES   |
| 40 |      | a        | 401.34                  | 0.06661                | YES             | YES   |
| 41 |      | a        | 402.35                  | 0.33753                | YES             | YES   |
| 42 |      | a        | 416.94                  | 18.50278               | YES             | YES   |
| 43 |      | a        | 429.83                  | 3.80817                | YES             | YES   |
| 44 |      | a        | 439.12                  | 14.05357               | YES             | YES   |
| 45 |      | a        | 455.41                  | 8.65813                | YES             | YES   |
| 46 |      | a        | 462.46                  | 13.72343               | YES             | YES   |
| 47 |      | a        | 465.15                  | 2.29291                | YES             | YES   |
| 48 |      | a        | 470.80                  | 0.71839                | YES             | YES   |
| 49 |      | a        | 479.01                  | 8.66726                | YES             | YES   |
| 50 |      | a        | 486.70                  | 6.50033                | YES             | YES   |

**2ca'**

|                                            |                                       |
|--------------------------------------------|---------------------------------------|
| SCF Energy (au) BP86/SV(P)                 | -2678.190378706                       |
| SCF Energy (au) PBE0/def2-TZVPP            | -2677.706376595                       |
| SCF Energy (au) PBE0/def2-TZVPP            | -2677.7174819824 (Toluene Correction) |
| Zero Point Energy (au)                     | 0.4159746                             |
| Chemical Potential (kJ mol <sup>-1</sup> ) | 916.06                                |
| Dispersion Correction (au) PBE0/def2-TZVPP | -0.08639897                           |

xyz coordinates

57

|    |            |            |            |
|----|------------|------------|------------|
| Mn | 0.7961401  | 2.5847105  | -1.0851902 |
| C  | 1.2500491  | 2.7717503  | 0.6500830  |
| C  | 2.4813310  | 2.0544182  | -1.5070732 |
| C  | 1.1939145  | 4.3117903  | -1.4411958 |
| O  | 1.4534377  | 5.4315807  | -1.6517531 |
| O  | 3.5663854  | 1.8259195  | -1.8522930 |
| O  | 1.5603437  | 2.8875984  | 1.7671783  |
| C  | -1.9187337 | 1.9701171  | -0.0555799 |
| C  | -1.8776272 | 4.1124029  | -1.0050859 |
| C  | -3.2343521 | 4.3236173  | -0.7320304 |
| C  | -3.9555682 | 3.3032904  | -0.0892464 |
| C  | -3.2903241 | 2.1206326  | 0.2481533  |
| C  | -1.1141102 | 0.7822773  | 0.2480661  |
| C  | 0.2167596  | 0.8397673  | -0.1695494 |
| C  | 1.1073012  | -0.2669546 | 0.1537331  |
| N  | 0.5226619  | -1.3819293 | 0.8429219  |
| C  | -0.8113962 | -1.4330731 | 1.2170725  |
| C  | -1.6355385 | -0.3635921 | 0.9287325  |
| H  | -1.2791530 | 4.8905777  | -1.5034612 |
| H  | -3.7078776 | 5.2752248  | -1.0190629 |
| H  | -5.0252499 | 3.4288905  | 0.1451857  |
| H  | -3.8303504 | 1.3024026  | 0.7462112  |
| O  | 2.3204438  | -0.3020275 | -0.1188913 |
| C  | -1.3260705 | -2.6620627 | 1.9203533  |
| H  | -2.6889701 | -0.4207582 | 1.2375034  |
| N  | -1.2260492 | 2.9768015  | -0.6777181 |
| H  | 0.4305322  | 3.6470920  | -3.8642917 |
| C  | 0.3284714  | 2.8248482  | -3.1539352 |
| C  | 0.1072887  | 1.5993603  | -2.8967459 |
| C  | -0.3320158 | 0.2701243  | -3.2666099 |
| H  | -1.2831841 | -3.5629399 | 1.2663069  |
| H  | -2.3851514 | -2.5114458 | 2.2126235  |
| H  | -0.7412688 | -2.8920748 | 2.8379881  |
| C  | 1.4470592  | -2.4902952 | 1.1537664  |
| C  | 1.9717429  | -2.4950662 | 2.5821842  |
| H  | 2.2958274  | -2.3481379 | 0.4523575  |
| H  | 0.9511891  | -3.4540546 | 0.9211390  |
| C  | 3.0186002  | -2.5396166 | 5.2130484  |
| C  | 2.4738845  | -3.7060846 | 4.6516553  |
| C  | 1.9522292  | -3.6802039 | 3.3463164  |
| C  | 2.5307111  | -1.3301185 | 3.1518695  |
| C  | 3.0448033  | -1.3531060 | 4.4581470  |
| H  | 3.4249358  | -2.5541871 | 6.2379724  |
| H  | 2.4496076  | -4.6430481 | 5.2327775  |
| H  | 1.5253732  | -4.6016461 | 2.9121475  |
| H  | 2.5769806  | -0.4018958 | 2.5601036  |
| H  | 3.4779642  | -0.4344876 | 4.8877950  |
| C  | -1.1888456 | -2.2916190 | -4.1159708 |
| C  | -2.0009716 | -1.1662434 | -4.3406083 |
| C  | -1.5782448 | 0.1047369  | -3.9237175 |
| C  | 0.4736494  | -0.8723298 | -3.0325241 |
| C  | 0.0486945  | -2.1367172 | -3.4651808 |

|   |            |            |            |
|---|------------|------------|------------|
| H | -1.5195209 | -3.2892602 | -4.4495344 |
| H | -2.9725869 | -1.2768177 | -4.8508210 |
| H | -2.2099208 | 0.9891133  | -4.1055410 |
| H | 1.4407025  | -0.7534001 | -2.5191253 |
| H | 0.6940667  | -3.0138514 | -3.2906557 |

\$vibrational spectrum

| #  | mode | symmetry | wave number<br>cm**(-1) | IR intensity<br>km/mol | selection rules |       |
|----|------|----------|-------------------------|------------------------|-----------------|-------|
| #  |      |          |                         |                        | IR              | RAMAN |
| 1  |      |          | 0.00                    | 0.00000                | -               | -     |
| 2  |      |          | 0.00                    | 0.00000                | -               | -     |
| 3  |      |          | 0.00                    | 0.00000                | -               | -     |
| 4  |      |          | 0.00                    | 0.00000                | -               | -     |
| 5  |      |          | 0.00                    | 0.00000                | -               | -     |
| 6  |      |          | 0.00                    | 0.00000                | -               | -     |
| 7  |      | a        | 13.98                   | 0.16013                | YES             | YES   |
| 8  |      | a        | 18.45                   | 0.16169                | YES             | YES   |
| 9  |      | a        | 23.39                   | 0.91198                | YES             | YES   |
| 10 |      | a        | 26.84                   | 0.00583                | YES             | YES   |
| 11 |      | a        | 34.42                   | 0.15750                | YES             | YES   |
| 12 |      | a        | 49.10                   | 0.02982                | YES             | YES   |
| 13 |      | a        | 52.96                   | 1.01254                | YES             | YES   |
| 14 |      | a        | 63.51                   | 0.73153                | YES             | YES   |
| 15 |      | a        | 73.89                   | 0.63088                | YES             | YES   |
| 16 |      | a        | 79.38                   | 0.96375                | YES             | YES   |
| 17 |      | a        | 82.15                   | 1.07061                | YES             | YES   |
| 18 |      | a        | 95.65                   | 0.70579                | YES             | YES   |
| 19 |      | a        | 100.84                  | 0.36578                | YES             | YES   |
| 20 |      | a        | 104.48                  | 0.08703                | YES             | YES   |
| 21 |      | a        | 109.67                  | 0.84019                | YES             | YES   |
| 22 |      | a        | 122.89                  | 1.57095                | YES             | YES   |
| 23 |      | a        | 128.37                  | 0.61223                | YES             | YES   |
| 24 |      | a        | 153.86                  | 0.54673                | YES             | YES   |
| 25 |      | a        | 158.56                  | 0.16737                | YES             | YES   |
| 26 |      | a        | 178.88                  | 0.53684                | YES             | YES   |
| 27 |      | a        | 185.41                  | 2.14388                | YES             | YES   |
| 28 |      | a        | 192.23                  | 1.63138                | YES             | YES   |
| 29 |      | a        | 206.72                  | 1.76481                | YES             | YES   |
| 30 |      | a        | 213.42                  | 0.34350                | YES             | YES   |
| 31 |      | a        | 243.95                  | 1.05407                | YES             | YES   |
| 32 |      | a        | 247.83                  | 1.08144                | YES             | YES   |
| 33 |      | a        | 262.98                  | 0.36073                | YES             | YES   |
| 34 |      | a        | 281.31                  | 1.23538                | YES             | YES   |
| 35 |      | a        | 310.09                  | 5.88444                | YES             | YES   |
| 36 |      | a        | 330.66                  | 9.26868                | YES             | YES   |
| 37 |      | a        | 342.45                  | 5.75582                | YES             | YES   |
| 38 |      | a        | 367.77                  | 4.50765                | YES             | YES   |
| 39 |      | a        | 391.01                  | 1.25030                | YES             | YES   |
| 40 |      | a        | 402.56                  | 0.10780                | YES             | YES   |
| 41 |      | a        | 403.68                  | 2.37536                | YES             | YES   |
| 42 |      | a        | 409.01                  | 13.17384               | YES             | YES   |
| 43 |      | a        | 431.49                  | 11.95146               | YES             | YES   |
| 44 |      | a        | 442.41                  | 14.97434               | YES             | YES   |
| 45 |      | a        | 457.92                  | 0.40690                | YES             | YES   |
| 46 |      | a        | 464.95                  | 1.20181                | YES             | YES   |
| 47 |      | a        | 468.56                  | 6.69897                | YES             | YES   |
| 48 |      | a        | 471.25                  | 3.35441                | YES             | YES   |
| 49 |      | a        | 478.00                  | 3.89641                | YES             | YES   |
| 50 |      | a        | 485.52                  | 6.40456                | YES             | YES   |

**2da**

SCF Energy (au) BP86/SV(P) -2409.004534403  
 SCF Energy (au) PBE0/def2-TZVPP -2408.542817634  
 SCF Energy (au) PBE0/def2-TZVPP -2408.5510777761 (Toluene Correction)  
 Zero Point Energy (au) 0.3178444  
 Chemical Potential (kJ mol<sup>-1</sup>) 679.64  
 Dispersion Correction (au) PBE0/def2-TZVPP -0.06709809

xyz coordinates

45

|    |            |            |            |
|----|------------|------------|------------|
| Mn | 1.5197310  | 0.5470025  | 0.3436074  |
| C  | 1.9098030  | 0.8269867  | 2.0810763  |
| C  | 3.1834914  | -0.0444268 | 0.0203656  |
| C  | 1.9301135  | 2.2698775  | -0.0671300 |
| O  | 2.2237609  | 3.3814057  | -0.2662464 |
| O  | 4.2544275  | -0.4565929 | -0.1836553 |
| O  | 2.1616682  | 1.0008020  | 3.2032102  |
| C  | -1.2049045 | -0.1258313 | 1.2768286  |
| C  | -1.1589754 | 2.0562942  | 0.4177521  |
| C  | -2.5219656 | 2.2484819  | 0.6575306  |
| C  | -3.2447226 | 1.1885736  | 1.2332793  |
| C  | -2.5904925 | -0.0046829 | 1.5445731  |
| N  | -0.4345005 | -1.2439296 | 1.5412602  |
| C  | 0.9499691  | -1.2028048 | 1.1921142  |
| C  | 1.5082306  | -2.4082537 | 1.5598700  |
| C  | 0.4804587  | -3.2427178 | 2.1402405  |
| C  | -0.7448065 | -2.4960049 | 2.1266952  |
| H  | -0.5477021 | 2.8540095  | -0.0310344 |
| H  | -2.9972974 | 3.2064907  | 0.3991233  |
| H  | -4.3222679 | 1.2891001  | 1.4423592  |
| H  | -3.1456491 | -0.8365420 | 1.9889839  |
| H  | 2.5624864  | -2.6854686 | 1.4310032  |
| C  | 0.4951000  | -4.5502559 | 2.6685547  |
| N  | -0.5072941 | 0.9101560  | 0.7131965  |
| C  | 0.8271748  | 1.5978722  | -2.8620085 |
| C  | 1.9509091  | 2.3147130  | -3.3463859 |
| C  | 1.7939842  | 3.2932883  | -4.3372283 |
| C  | 0.5191695  | 3.5832855  | -4.8561966 |
| C  | -0.6026395 | 2.8814165  | -4.3811110 |
| C  | -0.4550859 | 1.8969480  | -3.3931721 |
| H  | 2.9505721  | 2.0905373  | -2.9429216 |
| H  | 2.6781598  | 3.8380295  | -4.7070955 |
| H  | 0.4001929  | 4.3572543  | -5.6321738 |
| H  | -1.6046992 | 3.1003949  | -4.7859256 |
| H  | -1.3312893 | 1.3404153  | -3.0245511 |
| C  | 0.9579810  | 0.5504308  | -1.8770337 |
| C  | 0.8890639  | -0.5923575 | -1.3453656 |
| H  | 0.7411585  | -1.6707348 | -1.3980957 |
| H  | 1.4336625  | -5.1283198 | 2.6819725  |
| C  | -0.6914407 | -5.1000768 | 3.1740729  |
| H  | -0.6902216 | -6.1214082 | 3.5892289  |
| C  | -1.8900312 | -4.3559507 | 3.1584690  |
| H  | -2.8156297 | -4.7983334 | 3.5616334  |
| C  | -1.9319458 | -3.0495780 | 2.6376779  |
| H  | -2.8877072 | -2.5094957 | 2.6526528  |

\$vibrational spectrum

| # | mode | symmetry | wave number<br>cm**(-1) | IR intensity<br>km/mol | selection rules<br>IR RAMAN |
|---|------|----------|-------------------------|------------------------|-----------------------------|
| # |      |          |                         |                        |                             |
|   | 1    |          | 0.00                    | 0.00000                | - -                         |
|   | 2    |          | 0.00                    | 0.00000                | - -                         |
|   | 3    |          | 0.00                    | 0.00000                | - -                         |

|    |   |        |          |     |     |
|----|---|--------|----------|-----|-----|
| 4  |   | 0.00   | 0.00000  | -   | -   |
| 5  |   | 0.00   | 0.00000  | -   | -   |
| 6  |   | 0.00   | 0.00000  | -   | -   |
| 7  | a | 16.31  | 0.07965  | YES | YES |
| 8  | a | 17.65  | 0.09997  | YES | YES |
| 9  | a | 25.65  | 0.26847  | YES | YES |
| 10 | a | 47.19  | 0.24354  | YES | YES |
| 11 | a | 56.47  | 0.07018  | YES | YES |
| 12 | a | 64.10  | 0.09528  | YES | YES |
| 13 | a | 67.11  | 0.32495  | YES | YES |
| 14 | a | 79.62  | 0.42679  | YES | YES |
| 15 | a | 87.94  | 0.74734  | YES | YES |
| 16 | a | 99.82  | 0.51131  | YES | YES |
| 17 | a | 104.85 | 1.07356  | YES | YES |
| 18 | a | 111.88 | 0.11920  | YES | YES |
| 19 | a | 122.33 | 0.21282  | YES | YES |
| 20 | a | 143.47 | 1.40069  | YES | YES |
| 21 | a | 157.32 | 5.11267  | YES | YES |
| 22 | a | 168.97 | 2.48278  | YES | YES |
| 23 | a | 178.12 | 0.99525  | YES | YES |
| 24 | a | 215.31 | 0.22371  | YES | YES |
| 25 | a | 238.99 | 0.23718  | YES | YES |
| 26 | a | 256.73 | 6.23442  | YES | YES |
| 27 | a | 280.88 | 0.52625  | YES | YES |
| 28 | a | 306.39 | 21.32459 | YES | YES |
| 29 | a | 315.88 | 1.87150  | YES | YES |
| 30 | a | 352.24 | 1.47949  | YES | YES |
| 31 | a | 366.05 | 5.07142  | YES | YES |
| 32 | a | 400.09 | 0.38943  | YES | YES |
| 33 | a | 407.71 | 7.20090  | YES | YES |
| 34 | a | 422.47 | 1.06470  | YES | YES |
| 35 | a | 431.12 | 1.93796  | YES | YES |
| 36 | a | 456.79 | 15.18417 | YES | YES |
| 37 | a | 473.69 | 2.51350  | YES | YES |
| 38 | a | 478.93 | 13.77269 | YES | YES |
| 39 | a | 486.33 | 3.55622  | YES | YES |
| 40 | a | 493.78 | 13.48945 | YES | YES |
| 41 | a | 501.81 | 16.05292 | YES | YES |
| 42 | a | 513.21 | 1.64317  | YES | YES |
| 43 | a | 516.95 | 0.49905  | YES | YES |
| 44 | a | 523.19 | 37.80879 | YES | YES |
| 45 | a | 537.83 | 7.06320  | YES | YES |
| 46 | a | 554.10 | 7.08855  | YES | YES |
| 47 | a | 571.12 | 0.17654  | YES | YES |
| 48 | a | 589.91 | 8.62866  | YES | YES |
| 49 | a | 611.07 | 12.74284 | YES | YES |
| 50 | a | 613.67 | 2.03699  | YES | YES |

**2da'**

SCF Energy (au) BP86/SV(P) -2409.003236277  
 SCF Energy (au) PBE0/def2-TZVPP -2408.541068212  
 SCF Energy (au) PBE0/def2-TZVPP -2408.5491894788 (Toluene Correction)  
 Zero Point Energy (au) 0.3178436  
 Chemical Potential (kJ mol<sup>-1</sup>) 680.78  
 Dispersion Correction (au) PBE0/def2-TZVPP -0.06958346

## xyz coordinates

45

|    |            |            |            |
|----|------------|------------|------------|
| Mn | 1.6114787  | 2.0224123  | -0.1294482 |
| C  | 1.9124242  | 2.3882443  | 1.6130026  |
| C  | 3.3069043  | 1.4797935  | -0.3640030 |
| C  | 1.9537395  | 3.7493582  | -0.5687954 |
| O  | 2.1911893  | 4.8621185  | -0.8290349 |
| O  | 4.3945181  | 1.0868426  | -0.5076838 |
| O  | 2.1133826  | 2.6348062  | 2.7313371  |
| C  | -1.0999543 | 1.1950939  | 0.7151392  |
| C  | -1.1734098 | 3.3233061  | -0.2672068 |
| C  | -2.5598082 | 3.4139375  | -0.1227346 |
| C  | -3.2331398 | 2.3243121  | 0.4589504  |
| C  | -2.5076960 | 1.2075558  | 0.8767864  |
| N  | -0.2598291 | 0.1667125  | 1.0975266  |
| C  | 1.1285164  | 0.2877215  | 0.7892940  |
| C  | 1.7639615  | -0.8264179 | 1.2966744  |
| C  | 0.7824824  | -1.6835292 | 1.9209497  |
| C  | -0.4947175 | -1.0432808 | 1.7940818  |
| H  | -0.5986462 | 4.1430608  | -0.7250315 |
| H  | -3.0927997 | 4.3144785  | -0.4625970 |
| H  | -4.3280388 | 2.3403880  | 0.5843860  |
| H  | -3.0244406 | 0.3456729  | 1.3111972  |
| H  | 2.8428089  | -1.0225844 | 1.2437251  |
| C  | 0.8787449  | -2.9251389 | 2.5820625  |
| N  | -0.4526673 | 2.2542483  | 0.1355482  |
| H  | 1.4252327  | 2.9305479  | -2.9825719 |
| C  | 1.2749429  | 2.1317796  | -2.2549764 |
| C  | 1.0302276  | 0.9214792  | -1.9744502 |
| C  | 0.6010528  | -0.4326949 | -2.2310418 |
| H  | 1.8581874  | -3.4207374 | 2.6835846  |
| C  | -0.2794590 | -3.5132887 | 3.1097021  |
| H  | -0.2150666 | -4.4835600 | 3.6292674  |
| C  | -1.5294780 | -2.8709534 | 2.9860483  |
| H  | -2.4316533 | -3.3406685 | 3.4109535  |
| C  | -1.6528098 | -1.6320255 | 2.3307129  |
| H  | -2.6452131 | -1.1660218 | 2.2707994  |
| C  | -0.2569970 | -3.0608890 | -2.8308959 |
| C  | -1.1188276 | -1.9713558 | -3.0487209 |
| C  | -0.6974520 | -0.6670022 | -2.7534160 |
| C  | 1.4590036  | -1.5386594 | -2.0074787 |
| C  | 1.0315616  | -2.8379490 | -2.3143524 |
| H  | -0.5904122 | -4.0856771 | -3.0632895 |
| H  | -2.1299911 | -2.1378258 | -3.4561038 |
| H  | -1.3683259 | 0.1890256  | -2.9296280 |
| H  | 2.4680464  | -1.3648277 | -1.6056212 |
| H  | 1.7124272  | -3.6878085 | -2.1426469 |

## \$vibrational spectrum

| # | mode | symmetry | wave number | IR intensity | selection rules |
|---|------|----------|-------------|--------------|-----------------|
| # |      |          | cm**(-1)    | km/mol       | IR RAMAN        |
|   | 1    |          | 0.00        | 0.00000      | - -             |
|   | 2    |          | 0.00        | 0.00000      | - -             |
|   | 3    |          | 0.00        | 0.00000      | - -             |



|    |   |        |          |     |     |
|----|---|--------|----------|-----|-----|
| 4  |   | 0.00   | 0.00000  | -   | -   |
| 5  |   | 0.00   | 0.00000  | -   | -   |
| 6  |   | 0.00   | 0.00000  | -   | -   |
| 7  | a | 15.45  | 0.16430  | YES | YES |
| 8  | a | 20.66  | 0.16312  | YES | YES |
| 9  | a | 27.61  | 0.30383  | YES | YES |
| 10 | a | 49.13  | 0.08630  | YES | YES |
| 11 | a | 59.94  | 0.16090  | YES | YES |
| 12 | a | 65.57  | 0.28800  | YES | YES |
| 13 | a | 68.58  | 0.53915  | YES | YES |
| 14 | a | 75.86  | 0.08201  | YES | YES |
| 15 | a | 88.40  | 0.25179  | YES | YES |
| 16 | a | 98.66  | 0.56138  | YES | YES |
| 17 | a | 103.05 | 0.65599  | YES | YES |
| 18 | a | 106.88 | 0.54148  | YES | YES |
| 19 | a | 126.59 | 0.02338  | YES | YES |
| 20 | a | 150.94 | 0.53832  | YES | YES |
| 21 | a | 162.96 | 2.42157  | YES | YES |
| 22 | a | 168.46 | 1.32486  | YES | YES |
| 23 | a | 178.57 | 1.51189  | YES | YES |
| 24 | a | 212.26 | 0.21873  | YES | YES |
| 25 | a | 238.54 | 0.76712  | YES | YES |
| 26 | a | 257.32 | 1.47958  | YES | YES |
| 27 | a | 283.38 | 3.04667  | YES | YES |
| 28 | a | 310.87 | 5.24429  | YES | YES |
| 29 | a | 327.36 | 9.96005  | YES | YES |
| 30 | a | 352.85 | 0.86261  | YES | YES |
| 31 | a | 366.38 | 4.12868  | YES | YES |
| 32 | a | 398.02 | 4.32884  | YES | YES |
| 33 | a | 402.62 | 7.57207  | YES | YES |
| 34 | a | 421.35 | 4.23673  | YES | YES |
| 35 | a | 430.23 | 9.78177  | YES | YES |
| 36 | a | 461.07 | 5.52510  | YES | YES |
| 37 | a | 475.56 | 2.62213  | YES | YES |
| 38 | a | 479.33 | 5.02750  | YES | YES |
| 39 | a | 488.60 | 0.62185  | YES | YES |
| 40 | a | 494.56 | 6.21874  | YES | YES |
| 41 | a | 497.45 | 14.72589 | YES | YES |
| 42 | a | 511.89 | 1.50073  | YES | YES |
| 43 | a | 519.62 | 1.34959  | YES | YES |
| 44 | a | 529.49 | 16.84794 | YES | YES |
| 45 | a | 534.71 | 3.87538  | YES | YES |
| 46 | a | 567.27 | 4.37452  | YES | YES |
| 47 | a | 571.42 | 0.03474  | YES | YES |
| 48 | a | 592.92 | 6.68595  | YES | YES |
| 49 | a | 611.93 | 9.00493  | YES | YES |
| 50 | a | 613.42 | 6.37682  | YES | YES |

**2ea**

|                                            |                                       |
|--------------------------------------------|---------------------------------------|
| SCF Energy (au) BP86/SV(P)                 | -2583.758694363                       |
| SCF Energy (au) PBE0/def2-TZVPP            | -2583.308834131                       |
| SCF Energy (au) PBE0/def2-TZVPP            | -2583.3186219410 (Toluene Correction) |
| Zero Point Energy (au)                     | 0.3858375                             |
| Chemical Potential (kJ mol <sup>-1</sup> ) | 840.51                                |
| Dispersion Correction (au) PBE0/def2-TZVPP | -0.07229098                           |

xyz coordinates

53

|    |            |            |            |
|----|------------|------------|------------|
| Mn | 2.2230988  | 0.6317792  | -0.0380673 |
| C  | 2.6156062  | 1.1476731  | 1.6392340  |
| C  | 3.9387085  | 0.1811112  | -0.3247176 |
| C  | 2.4125292  | 2.3193182  | -0.6911169 |
| O  | 2.5413774  | 3.4196005  | -1.0551924 |
| O  | 5.0506470  | -0.1331539 | -0.4981009 |
| O  | 2.8767051  | 1.4700797  | 2.7277647  |
| C  | -0.4539945 | -0.0297274 | 0.9096872  |
| C  | -1.9246317 | 0.0913870  | 1.0871830  |
| C  | 0.3558878  | -1.1297064 | 1.4172808  |
| C  | 1.7432603  | -1.0509487 | 1.0754004  |
| C  | 2.6077351  | -2.0542027 | 1.5517480  |
| C  | 2.1177715  | -3.1166002 | 2.3474416  |
| C  | 0.7427944  | -3.1752783 | 2.6929163  |
| C  | -0.1235398 | -2.1864952 | 2.2356941  |
| H  | 3.6801806  | -2.0058785 | 1.3091043  |
| O  | 2.8869000  | -4.1224309 | 2.8426613  |
| H  | 0.3950079  | -4.0008383 | 3.3326722  |
| H  | -1.1848113 | -2.2197783 | 2.5316610  |
| N  | 0.2295362  | 0.8918881  | 0.2643551  |
| C  | 1.2662731  | 1.0751896  | -3.2954025 |
| C  | 2.2345091  | 1.8668127  | -3.9638754 |
| C  | 1.8687155  | 2.6586890  | -5.0606656 |
| C  | 0.5347223  | 2.6874656  | -5.5058725 |
| C  | -0.4352712 | 1.9114622  | -4.8473054 |
| C  | -0.0776139 | 1.1120552  | -3.7519775 |
| H  | 3.2792071  | 1.8489973  | -3.6164200 |
| H  | 2.6348500  | 3.2643171  | -5.5724379 |
| H  | 0.2515102  | 3.3164568  | -6.3659739 |
| H  | -1.4830307 | 1.9265356  | -5.1911149 |
| H  | -0.8346306 | 0.4992213  | -3.2369763 |
| C  | 1.6163849  | 0.2176182  | -2.1884952 |
| C  | 1.7524455  | -0.8361841 | -1.5029239 |
| H  | 1.7703661  | -1.9228945 | -1.4187534 |
| C  | -4.7416295 | 0.3982927  | 1.3390996  |
| C  | -4.1874919 | -0.8306805 | 0.9085777  |
| C  | -2.8044347 | -0.9812409 | 0.7916161  |
| C  | -2.4915732 | 1.3143236  | 1.5082184  |
| C  | -3.8796569 | 1.4757364  | 1.6412510  |
| O  | -6.0976318 | 0.4422766  | 1.4283706  |
| H  | -4.8744120 | -1.6562320 | 0.6648427  |
| H  | -2.3950795 | -1.9390571 | 0.4327292  |
| H  | -1.8296331 | 2.1579555  | 1.7662896  |
| H  | -4.2759343 | 2.4409076  | 1.9886844  |
| H  | -0.3377541 | 1.6556536  | -0.1300338 |
| C  | -6.7187729 | 1.6476577  | 1.8463775  |
| H  | -6.4076413 | 1.9356514  | 2.8783423  |
| H  | -7.8093098 | 1.4493254  | 1.8391284  |
| H  | -6.4964900 | 2.4895023  | 1.1487841  |
| C  | 4.2807820  | -4.1239894 | 2.5719257  |
| H  | 4.7805171  | -3.2159617 | 2.9829648  |
| H  | 4.4885289  | -4.1896897 | 1.4784253  |

H 4.6884108 -5.0239717 3.0749915

\$vibrational spectrum

| #  | mode | symmetry | wave number<br>cm** (-1) | IR intensity<br>km/mol | selection rules |       |
|----|------|----------|--------------------------|------------------------|-----------------|-------|
| #  |      |          |                          |                        | IR              | RAMAN |
| 1  |      |          | 0.00                     | 0.00000                | -               | -     |
| 2  |      |          | 0.00                     | 0.00000                | -               | -     |
| 3  |      |          | 0.00                     | 0.00000                | -               | -     |
| 4  |      |          | 0.00                     | 0.00000                | -               | -     |
| 5  |      |          | 0.00                     | 0.00000                | -               | -     |
| 6  |      |          | 0.00                     | 0.00000                | -               | -     |
| 7  |      | a        | 12.66                    | 0.11198                | YES             | YES   |
| 8  |      | a        | 23.85                    | 0.14135                | YES             | YES   |
| 9  |      | a        | 28.24                    | 0.19019                | YES             | YES   |
| 10 |      | a        | 35.42                    | 0.79697                | YES             | YES   |
| 11 |      | a        | 38.32                    | 0.42459                | YES             | YES   |
| 12 |      | a        | 47.51                    | 0.69116                | YES             | YES   |
| 13 |      | a        | 61.68                    | 0.10633                | YES             | YES   |
| 14 |      | a        | 65.84                    | 0.17130                | YES             | YES   |
| 15 |      | a        | 75.47                    | 0.44825                | YES             | YES   |
| 16 |      | a        | 85.53                    | 1.07252                | YES             | YES   |
| 17 |      | a        | 87.59                    | 0.33363                | YES             | YES   |
| 18 |      | a        | 94.62                    | 0.20706                | YES             | YES   |
| 19 |      | a        | 101.89                   | 0.26170                | YES             | YES   |
| 20 |      | a        | 103.56                   | 2.42543                | YES             | YES   |
| 21 |      | a        | 114.60                   | 0.52142                | YES             | YES   |
| 22 |      | a        | 121.22                   | 1.35366                | YES             | YES   |
| 23 |      | a        | 146.22                   | 0.28143                | YES             | YES   |
| 24 |      | a        | 154.04                   | 1.68102                | YES             | YES   |
| 25 |      | a        | 160.20                   | 0.18190                | YES             | YES   |
| 26 |      | a        | 168.67                   | 8.51326                | YES             | YES   |
| 27 |      | a        | 180.21                   | 2.01157                | YES             | YES   |
| 28 |      | a        | 190.96                   | 1.43101                | YES             | YES   |
| 29 |      | a        | 204.10                   | 0.46082                | YES             | YES   |
| 30 |      | a        | 236.74                   | 0.90063                | YES             | YES   |
| 31 |      | a        | 246.28                   | 0.61014                | YES             | YES   |
| 32 |      | a        | 256.47                   | 2.28427                | YES             | YES   |
| 33 |      | a        | 266.71                   | 1.10966                | YES             | YES   |
| 34 |      | a        | 300.24                   | 1.39938                | YES             | YES   |
| 35 |      | a        | 316.99                   | 24.15601               | YES             | YES   |
| 36 |      | a        | 319.55                   | 2.82845                | YES             | YES   |
| 37 |      | a        | 342.78                   | 0.96020                | YES             | YES   |
| 38 |      | a        | 361.53                   | 5.33052                | YES             | YES   |
| 39 |      | a        | 400.11                   | 0.10893                | YES             | YES   |
| 40 |      | a        | 409.14                   | 5.85992                | YES             | YES   |
| 41 |      | a        | 415.96                   | 2.75722                | YES             | YES   |
| 42 |      | a        | 422.26                   | 1.54838                | YES             | YES   |
| 43 |      | a        | 444.19                   | 13.52271               | YES             | YES   |
| 44 |      | a        | 454.37                   | 1.42207                | YES             | YES   |
| 45 |      | a        | 458.56                   | 2.83272                | YES             | YES   |
| 46 |      | a        | 475.83                   | 3.34516                | YES             | YES   |
| 47 |      | a        | 478.06                   | 8.31028                | YES             | YES   |
| 48 |      | a        | 488.23                   | 4.80640                | YES             | YES   |
| 49 |      | a        | 495.22                   | 10.53210               | YES             | YES   |
| 50 |      | a        | 502.27                   | 14.32391               | YES             | YES   |

**2ea'**

|                                            |                                       |
|--------------------------------------------|---------------------------------------|
| SCF Energy (au) BP86/SV(P)                 | -2583.755936542                       |
| SCF Energy (au) PBE0/def2-TZVPP            | -2583.306604497                       |
| SCF Energy (au) PBE0/def2-TZVPP            | -2583.3161494270 (Toluene Correction) |
| Zero Point Energy (au)                     | 0.3858163                             |
| Chemical Potential (kJ mol <sup>-1</sup> ) | 841.85                                |
| Dispersion Correction (au) PBE0/def2-TZVPP | -0.07594655                           |

xyz coordinates

53

|    |            |            |            |
|----|------------|------------|------------|
| Mn | 1.9919400  | 1.9445815  | -0.2125446 |
| C  | 2.1534808  | 2.3744254  | 1.5290994  |
| C  | 3.7492214  | 1.5853193  | -0.3113953 |
| C  | 2.1488295  | 3.6785107  | -0.7263564 |
| O  | 2.2404524  | 4.7993586  | -1.0377011 |
| O  | 4.8853661  | 1.3177075  | -0.3697285 |
| O  | 2.2698990  | 2.6577750  | 2.6525923  |
| C  | -0.7159006 | 1.1112818  | 0.4928948  |
| C  | 0.1043036  | 0.0054276  | 0.9687169  |
| C  | 1.5091645  | 0.1721588  | 0.7533872  |
| C  | 2.3773587  | -0.8410027 | 1.1958039  |
| C  | 1.8728113  | -2.0152812 | 1.8030053  |
| C  | 0.4752568  | -2.1871422 | 1.9748359  |
| C  | -0.3961908 | -1.1855143 | 1.5574072  |
| H  | 3.4624674  | -0.7284284 | 1.0533317  |
| O  | 2.6454017  | -3.0414031 | 2.2472929  |
| H  | 0.1110908  | -3.1192603 | 2.4333817  |
| H  | -1.4825776 | -1.3313196 | 1.6747097  |
| N  | -0.0377682 | 2.0698256  | -0.1025837 |
| H  | 1.6963008  | 2.6226932  | -3.1216314 |
| C  | 1.7555164  | 1.8524320  | -2.3511876 |
| C  | 1.7682332  | 0.6340095  | -2.0105774 |
| C  | 1.8077286  | -0.8002035 | -2.1790042 |
| C  | 1.9200425  | -3.6011320 | -2.5779877 |
| C  | 3.0989686  | -2.8350822 | -2.6115416 |
| C  | 3.0485007  | -1.4479013 | -2.4103047 |
| C  | 0.6263831  | -1.5815302 | -2.1436240 |
| C  | 0.6864749  | -2.9683920 | -2.3432424 |
| H  | 1.9626934  | -4.6916637 | -2.7344687 |
| H  | 4.0704284  | -3.3222218 | -2.7994052 |
| H  | 3.9712861  | -0.8468055 | -2.4342545 |
| H  | -0.3402928 | -1.0879230 | -1.9607610 |
| H  | -0.2421060 | -3.5621325 | -2.3141260 |
| C  | -2.1920915 | 1.1993839  | 0.6436670  |
| C  | -5.0083214 | 1.4914085  | 0.9169598  |
| C  | -4.2119099 | 1.1238512  | 2.0274378  |
| C  | -2.8306057 | 0.9750933  | 1.8900714  |
| C  | -2.9975772 | 1.5734107  | -0.4539791 |
| C  | -4.3889449 | 1.7150685  | -0.3325568 |
| O  | -6.3429842 | 1.6032685  | 1.1508950  |
| H  | -4.7089911 | 0.9678227  | 2.9977093  |
| H  | -2.2261438 | 0.7135808  | 2.7732747  |
| H  | -2.5283966 | 1.7355727  | -1.4391278 |
| H  | -4.9787167 | 1.9923799  | -1.2184360 |
| H  | -0.6034216 | 2.8775078  | -0.3994740 |
| C  | -7.1972825 | 1.9790936  | 0.0823794  |
| H  | -7.1680455 | 1.2368679  | -0.7501530 |
| H  | -6.9375345 | 2.9876305  | -0.3178743 |
| H  | -8.2215719 | 2.0095391  | 0.5047845  |
| C  | 4.0556463  | -2.9552201 | 2.1058369  |
| H  | 4.4730160  | -2.0857501 | 2.6654880  |
| H  | 4.3560879  | -2.8782928 | 1.0352177  |

H 4.4630239 -3.8933836 2.5338468

\$vibrational spectrum

| #  | mode | symmetry | wave number<br>cm** (-1) | IR intensity<br>km/mol | selection rules |       |
|----|------|----------|--------------------------|------------------------|-----------------|-------|
| #  |      |          |                          |                        | IR              | RAMAN |
| 1  |      |          | 0.00                     | 0.00000                | -               | -     |
| 2  |      |          | 0.00                     | 0.00000                | -               | -     |
| 3  |      |          | 0.00                     | 0.00000                | -               | -     |
| 4  |      |          | 0.00                     | 0.00000                | -               | -     |
| 5  |      |          | 0.00                     | 0.00000                | -               | -     |
| 6  |      |          | 0.00                     | 0.00000                | -               | -     |
| 7  |      | a        | 14.75                    | 0.06828                | YES             | YES   |
| 8  |      | a        | 28.47                    | 0.19583                | YES             | YES   |
| 9  |      | a        | 33.94                    | 0.28112                | YES             | YES   |
| 10 |      | a        | 36.54                    | 0.25294                | YES             | YES   |
| 11 |      | a        | 38.48                    | 0.16597                | YES             | YES   |
| 12 |      | a        | 49.80                    | 1.04111                | YES             | YES   |
| 13 |      | a        | 54.04                    | 0.26221                | YES             | YES   |
| 14 |      | a        | 64.84                    | 0.11492                | YES             | YES   |
| 15 |      | a        | 76.74                    | 0.35850                | YES             | YES   |
| 16 |      | a        | 84.30                    | 1.11652                | YES             | YES   |
| 17 |      | a        | 89.15                    | 0.20915                | YES             | YES   |
| 18 |      | a        | 93.26                    | 0.14079                | YES             | YES   |
| 19 |      | a        | 96.89                    | 1.50910                | YES             | YES   |
| 20 |      | a        | 107.51                   | 0.21592                | YES             | YES   |
| 21 |      | a        | 113.30                   | 0.33480                | YES             | YES   |
| 22 |      | a        | 120.74                   | 2.23271                | YES             | YES   |
| 23 |      | a        | 149.98                   | 1.82201                | YES             | YES   |
| 24 |      | a        | 158.02                   | 1.52750                | YES             | YES   |
| 25 |      | a        | 163.84                   | 1.18213                | YES             | YES   |
| 26 |      | a        | 175.37                   | 3.19118                | YES             | YES   |
| 27 |      | a        | 176.20                   | 2.30265                | YES             | YES   |
| 28 |      | a        | 183.71                   | 0.31709                | YES             | YES   |
| 29 |      | a        | 192.21                   | 0.53953                | YES             | YES   |
| 30 |      | a        | 242.22                   | 0.72845                | YES             | YES   |
| 31 |      | a        | 249.25                   | 0.73961                | YES             | YES   |
| 32 |      | a        | 255.05                   | 0.48763                | YES             | YES   |
| 33 |      | a        | 268.62                   | 1.23736                | YES             | YES   |
| 34 |      | a        | 296.84                   | 2.72505                | YES             | YES   |
| 35 |      | a        | 305.94                   | 17.11122               | YES             | YES   |
| 36 |      | a        | 317.81                   | 1.02634                | YES             | YES   |
| 37 |      | a        | 340.78                   | 0.34148                | YES             | YES   |
| 38 |      | a        | 362.30                   | 4.98498                | YES             | YES   |
| 39 |      | a        | 398.05                   | 10.51671               | YES             | YES   |
| 40 |      | a        | 399.04                   | 1.53104                | YES             | YES   |
| 41 |      | a        | 415.91                   | 3.33119                | YES             | YES   |
| 42 |      | a        | 420.81                   | 0.98381                | YES             | YES   |
| 43 |      | a        | 444.89                   | 0.66886                | YES             | YES   |
| 44 |      | a        | 454.90                   | 1.69616                | YES             | YES   |
| 45 |      | a        | 461.02                   | 2.68253                | YES             | YES   |
| 46 |      | a        | 479.34                   | 5.64347                | YES             | YES   |
| 47 |      | a        | 484.40                   | 10.14586               | YES             | YES   |
| 48 |      | a        | 486.59                   | 7.70917                | YES             | YES   |
| 49 |      | a        | 495.03                   | 1.45340                | YES             | YES   |
| 50 |      | a        | 507.34                   | 4.79824                | YES             | YES   |

**2fa**

```

SCF Energy (au) BP86/SV(P) -2391.961394095
SCF Energy (au) PBE0/def2-TZVPP -2391.518095263
SCF Energy (au) PBE0/def2-TZVPP -2391.5259797091 (Toluene Correction)
Zero Point Energy (au) 0.3211004
Chemical Potential (kJ mol-1) 689.84
Dispersion Correction (au) PBE0/def2-TZVPP -0.06699866

```

## xyz coordinates

45

```

Mn 1.4798866 -0.2187247 0.6042757
C 1.9858282 0.1850369 2.2864095
C 3.1078742 -0.8153644 0.1948714
C 1.9261647 1.4494384 0.0171510
O 2.3355042 2.4877551 -0.3203568
O 4.1697173 -1.2232451 -0.0717724
O 2.3152063 0.4401459 3.3737385
C -1.1801954 -0.8102208 1.8566652
C -1.2646296 1.3042492 0.8362574
C -2.6149049 1.4850452 1.2047053
C -3.2443526 0.4625696 1.9267944
C -2.5298906 -0.6901692 2.2573493
C -0.3367492 -1.9750680 2.1535723
C 1.0015422 -1.9308193 1.6664095
C 1.8409481 -3.0288489 1.9547913
C 1.3735263 -4.1396970 2.6779099
C 0.0448376 -4.1782901 3.1430338
C -0.8044324 -3.0978098 2.8820827
O -0.5611747 2.2223023 0.1479445
H -3.1579348 2.4008478 0.9352112
H -4.2982282 0.5728714 2.2309414
H -3.0099922 -1.4987815 2.8248023
H 2.8878098 -3.0300007 1.6082221
H 2.0544672 -4.9834827 2.8831749
H -0.3244333 -5.0473483 3.7115733
H -1.8414812 -3.1328419 3.2538322
N -0.5632583 0.1880328 1.1483020
C 0.5092592 0.5040600 -2.6026110
C 1.5628757 1.2155775 -3.2293841
C 1.3059008 2.0406282 -4.3338314
C -0.0025131 2.1825144 -4.8298025
C -1.0570294 1.4841539 -4.2145901
C -0.8076042 0.6527288 -3.1127119
H 2.5900246 1.1076915 -2.8487855
H 2.1398662 2.5794532 -4.8133716
H -0.1994433 2.8342939 -5.6969663
H -2.0855771 1.5825957 -4.6007656
H -1.6311973 0.0979856 -2.6352136
C 0.7397492 -0.3979229 -1.4957523
C 0.6903825 -1.4982035 -0.8680577
H 0.5017714 -2.5721248 -0.8433323
C -1.1618881 3.4526384 -0.2331367
H -0.3662870 4.0176456 -0.7566458
H -1.5042302 4.0308366 0.6560919
H -2.0157150 3.2878659 -0.9290253

```

## \$vibrational spectrum

| # | mode | symmetry | wave number<br>cm**(-1) | IR intensity<br>km/mol | selection rules<br>IR RAMAN |
|---|------|----------|-------------------------|------------------------|-----------------------------|
| # |      |          |                         |                        |                             |
|   | 1    |          | 0.00                    | 0.00000                | - -                         |
|   | 2    |          | 0.00                    | 0.00000                | - -                         |
|   | 3    |          | 0.00                    | 0.00000                | - -                         |

|    |   |        |          |     |     |
|----|---|--------|----------|-----|-----|
| 4  |   | 0.00   | 0.00000  | -   | -   |
| 5  |   | 0.00   | 0.00000  | -   | -   |
| 6  |   | 0.00   | 0.00000  | -   | -   |
| 7  | a | 15.69  | 0.21459  | YES | YES |
| 8  | a | 29.61  | 0.05641  | YES | YES |
| 9  | a | 34.01  | 0.12405  | YES | YES |
| 10 | a | 43.43  | 0.08971  | YES | YES |
| 11 | a | 63.13  | 1.35943  | YES | YES |
| 12 | a | 75.59  | 1.13964  | YES | YES |
| 13 | a | 80.60  | 0.41255  | YES | YES |
| 14 | a | 90.18  | 0.49284  | YES | YES |
| 15 | a | 93.53  | 0.02787  | YES | YES |
| 16 | a | 100.58 | 0.83466  | YES | YES |
| 17 | a | 114.14 | 0.30028  | YES | YES |
| 18 | a | 118.32 | 0.18218  | YES | YES |
| 19 | a | 122.21 | 0.39617  | YES | YES |
| 20 | a | 129.25 | 0.90286  | YES | YES |
| 21 | a | 154.99 | 1.38789  | YES | YES |
| 22 | a | 156.86 | 0.72739  | YES | YES |
| 23 | a | 167.85 | 3.83857  | YES | YES |
| 24 | a | 182.29 | 1.19717  | YES | YES |
| 25 | a | 218.81 | 0.80044  | YES | YES |
| 26 | a | 229.75 | 0.95873  | YES | YES |
| 27 | a | 242.21 | 3.23163  | YES | YES |
| 28 | a | 254.84 | 0.06903  | YES | YES |
| 29 | a | 288.66 | 0.56483  | YES | YES |
| 30 | a | 305.04 | 0.17203  | YES | YES |
| 31 | a | 324.49 | 21.26696 | YES | YES |
| 32 | a | 334.75 | 2.71008  | YES | YES |
| 33 | a | 402.42 | 0.01934  | YES | YES |
| 34 | a | 407.91 | 0.84390  | YES | YES |
| 35 | a | 415.07 | 4.41464  | YES | YES |
| 36 | a | 435.04 | 8.05753  | YES | YES |
| 37 | a | 454.51 | 15.75093 | YES | YES |
| 38 | a | 459.11 | 2.46109  | YES | YES |
| 39 | a | 471.16 | 4.40160  | YES | YES |
| 40 | a | 478.30 | 3.94107  | YES | YES |
| 41 | a | 490.99 | 6.31778  | YES | YES |
| 42 | a | 499.39 | 3.20063  | YES | YES |
| 43 | a | 508.02 | 18.13741 | YES | YES |
| 44 | a | 513.95 | 2.54387  | YES | YES |
| 45 | a | 529.00 | 31.57498 | YES | YES |
| 46 | a | 536.56 | 11.31513 | YES | YES |
| 47 | a | 541.47 | 12.12873 | YES | YES |
| 48 | a | 555.01 | 2.26347  | YES | YES |
| 49 | a | 581.31 | 2.25487  | YES | YES |
| 50 | a | 606.94 | 24.76174 | YES | YES |

**2ej**

|                                            |                                       |
|--------------------------------------------|---------------------------------------|
| SCF Energy (au) BP86/SV(P)                 | -2814.654527730                       |
| SCF Energy (au) PBE0/def2-TZVPP            | -2814.168815490                       |
| SCF Energy (au) PBE0/def2-TZVPP            | -2814.1792225655 (Toluene Correction) |
| Zero Point Energy (au)                     | 0.4650797                             |
| Chemical Potential (kJ mol <sup>-1</sup> ) | 1029.53                               |
| Dispersion Correction (au) PBE0/def2-TZVPP | -0.09205668                           |

xyz coordinates

63

|    |            |            |            |
|----|------------|------------|------------|
| Mn | 1.9456160  | 1.1548608  | 0.1958505  |
| C  | 2.3174964  | 1.7535376  | 1.8490724  |
| C  | 3.6459403  | 0.6209492  | -0.0252364 |
| C  | 2.2417920  | 2.8057008  | -0.5079093 |
| O  | 2.4490777  | 3.8871159  | -0.8928812 |
| O  | 4.7469566  | 0.2515105  | -0.1584022 |
| O  | 2.5659906  | 2.1407198  | 2.9191820  |
| C  | -0.7687233 | 0.6675232  | 1.1429281  |
| C  | -2.2330554 | 0.8694433  | 1.2963279  |
| C  | -0.0099007 | -0.4218190 | 1.7424040  |
| C  | 1.3817626  | -0.4320683 | 1.4019474  |
| C  | 2.1968402  | -1.4323580 | 1.9608592  |
| C  | 1.6568351  | -2.4100915 | 2.8285623  |
| C  | 0.2808277  | -2.3773202 | 3.1737144  |
| C  | -0.5390031 | -1.3877409 | 2.6386067  |
| H  | 3.2693013  | -1.4571753 | 1.7161129  |
| O  | 2.3758798  | -3.4141733 | 3.3952372  |
| H  | -0.1049106 | -3.1348798 | 3.8732171  |
| H  | -1.6006016 | -1.3485107 | 2.9327252  |
| N  | -0.0394002 | 1.5042181  | 0.4342321  |
| C  | 0.7799226  | 1.6009485  | -2.9389564 |
| C  | 1.6257514  | 2.4310501  | -3.7179503 |
| C  | 1.0916549  | 3.2341651  | -4.7350415 |
| C  | -0.2917779 | 3.2368847  | -4.9889727 |
| C  | -1.1411542 | 2.4223127  | -4.2198555 |
| C  | -0.6147849 | 1.6105739  | -3.2041981 |
| H  | 2.7091332  | 2.4347565  | -3.5215034 |
| H  | 1.7642898  | 3.8688724  | -5.3354938 |
| H  | -0.7074816 | 3.8743582  | -5.7867409 |
| H  | -2.2266108 | 2.4146907  | -4.4148064 |
| H  | -1.2773778 | 0.9640588  | -2.6069194 |
| C  | 1.3055038  | 0.7353344  | -1.9069689 |
| C  | 1.5375929  | -0.3836632 | -1.3569005 |
| C  | 1.7895150  | -1.8090780 | -1.4301288 |
| C  | -5.0344965 | 1.3238325  | 1.5025429  |
| C  | -4.5355261 | 0.0372441  | 1.1888465  |
| C  | -3.1605106 | -0.1846951 | 1.0941285  |
| C  | -2.7457344 | 2.1499997  | 1.6003473  |
| C  | -4.1252938 | 2.3847820  | 1.7093693  |
| O  | -6.3870314 | 1.4358920  | 1.5812182  |
| H  | -5.2583003 | -0.7757992 | 1.0176185  |
| H  | -2.7951668 | -1.1888858 | 0.8259732  |
| H  | -2.0473340 | 2.9833999  | 1.7849273  |
| H  | -4.4783142 | 3.3945124  | 1.9645007  |
| H  | -0.5664635 | 2.2572249  | -0.0305651 |
| C  | -6.9544541 | 2.7007651  | 1.8840578  |
| H  | -6.6311035 | 3.0681702  | 2.8864834  |
| H  | -8.0526205 | 2.5505129  | 1.8903394  |
| H  | -6.6950736 | 3.4643635  | 1.1130867  |
| C  | 3.7623117  | -3.5203748 | 3.1025461  |
| H  | 4.3241281  | -2.6193473 | 3.4428990  |
| H  | 3.9408832  | -3.6724222 | 2.0130853  |



|   |           |            |            |
|---|-----------|------------|------------|
| H | 4.1242530 | -4.4071241 | 3.6610765  |
| C | 2.2998198 | -4.5825249 | -1.6992044 |
| C | 1.1606521 | -4.1354233 | -1.0061845 |
| C | 0.9082016 | -2.7631267 | -0.8644706 |
| C | 2.9391798 | -2.2701009 | -2.1219546 |
| C | 3.1886010 | -3.6441445 | -2.2533474 |
| H | 2.4955186 | -5.6624250 | -1.8064831 |
| H | 0.4604443 | -4.8642520 | -0.5655675 |
| H | 0.0205352 | -2.4157940 | -0.3143619 |
| H | 3.6347926 | -1.5346342 | -2.5551036 |
| H | 4.0852046 | -3.9843320 | -2.7979179 |

\$vibrational spectrum

| # | mode | symmetry | wave number<br>cm** (-1) | IR intensity<br>km/mol | selection rules |       |
|---|------|----------|--------------------------|------------------------|-----------------|-------|
| # |      |          |                          |                        | IR              | RAMAN |
|   | 1    |          | 0.00                     | 0.00000                | -               | -     |
|   | 2    |          | 0.00                     | 0.00000                | -               | -     |
|   | 3    |          | 0.00                     | 0.00000                | -               | -     |
|   | 4    |          | 0.00                     | 0.00000                | -               | -     |
|   | 5    |          | 0.00                     | 0.00000                | -               | -     |
|   | 6    |          | 0.00                     | 0.00000                | -               | -     |
|   | 7    | a        | 11.41                    | 0.09327                | YES             | YES   |
|   | 8    | a        | 16.85                    | 0.05804                | YES             | YES   |
|   | 9    | a        | 20.99                    | 0.16957                | YES             | YES   |
|   | 10   | a        | 28.16                    | 0.10066                | YES             | YES   |
|   | 11   | a        | 36.00                    | 0.86956                | YES             | YES   |
|   | 12   | a        | 39.01                    | 0.31055                | YES             | YES   |
|   | 13   | a        | 45.19                    | 0.10445                | YES             | YES   |
|   | 14   | a        | 48.27                    | 0.84812                | YES             | YES   |
|   | 15   | a        | 53.24                    | 0.12915                | YES             | YES   |
|   | 16   | a        | 61.97                    | 0.17545                | YES             | YES   |
|   | 17   | a        | 70.80                    | 0.30147                | YES             | YES   |
|   | 18   | a        | 77.93                    | 0.10995                | YES             | YES   |
|   | 19   | a        | 83.73                    | 0.90023                | YES             | YES   |
|   | 20   | a        | 90.22                    | 0.23146                | YES             | YES   |
|   | 21   | a        | 94.80                    | 0.17699                | YES             | YES   |
|   | 22   | a        | 98.30                    | 0.47627                | YES             | YES   |
|   | 23   | a        | 104.33                   | 0.89218                | YES             | YES   |
|   | 24   | a        | 109.49                   | 0.93333                | YES             | YES   |
|   | 25   | a        | 118.15                   | 1.82754                | YES             | YES   |
|   | 26   | a        | 146.42                   | 1.64226                | YES             | YES   |
|   | 27   | a        | 150.95                   | 1.34614                | YES             | YES   |
|   | 28   | a        | 158.67                   | 0.88868                | YES             | YES   |
|   | 29   | a        | 169.35                   | 2.88200                | YES             | YES   |
|   | 30   | a        | 181.04                   | 2.40710                | YES             | YES   |
|   | 31   | a        | 188.68                   | 3.26368                | YES             | YES   |
|   | 32   | a        | 191.67                   | 1.53467                | YES             | YES   |
|   | 33   | a        | 206.86                   | 0.62635                | YES             | YES   |
|   | 34   | a        | 230.76                   | 3.27932                | YES             | YES   |
|   | 35   | a        | 234.86                   | 2.02230                | YES             | YES   |
|   | 36   | a        | 248.55                   | 0.36116                | YES             | YES   |
|   | 37   | a        | 253.94                   | 1.23472                | YES             | YES   |
|   | 38   | a        | 267.87                   | 0.75825                | YES             | YES   |
|   | 39   | a        | 296.61                   | 3.74998                | YES             | YES   |
|   | 40   | a        | 320.41                   | 2.34102                | YES             | YES   |
|   | 41   | a        | 341.10                   | 0.88454                | YES             | YES   |
|   | 42   | a        | 360.93                   | 5.44085                | YES             | YES   |
|   | 43   | a        | 376.09                   | 10.14822               | YES             | YES   |
|   | 44   | a        | 382.42                   | 32.74494               | YES             | YES   |
|   | 45   | a        | 401.20                   | 0.01273                | YES             | YES   |
|   | 46   | a        | 402.61                   | 0.11511                | YES             | YES   |
|   | 47   | a        | 415.93                   | 2.26611                | YES             | YES   |
|   | 48   | a        | 421.73                   | 1.09351                | YES             | YES   |

|    |   |        |         |     |     |
|----|---|--------|---------|-----|-----|
| 49 | a | 440.76 | 4.23288 | YES | YES |
| 50 | a | 453.33 | 1.25458 | YES | YES |

**2fa'**

SCF Energy (au) BP86/SV(P) -2391.959491985  
 SCF Energy (au) PBE0/def2-TZVPP -2391.516131723  
 SCF Energy (au) PBE0/def2-TZVPP -2391.5242788848 (Toluene Correction)  
 Zero Point Energy (au) 0.3212083  
 Chemical Potential (kJ mol<sup>-1</sup>) 690.67  
 Dispersion Correction (au) PBE0/def2-TZVPP -0.06847143

## xyz coordinates

45

|    |            |            |            |
|----|------------|------------|------------|
| Mn | 1.3963769  | 1.3583796  | 0.3444836  |
| C  | 1.4957594  | 1.7909642  | 2.0933701  |
| C  | 3.1423484  | 1.0164151  | 0.2487564  |
| C  | 1.6670801  | 3.0927734  | -0.1289336 |
| O  | 1.9417192  | 4.1914285  | -0.4091898 |
| O  | 4.2810258  | 0.7630211  | 0.1844692  |
| O  | 1.5645760  | 2.0826934  | 3.2182820  |
| C  | -1.3013999 | 0.2766545  | 1.0687616  |
| C  | -1.5652880 | 2.3506976  | -0.0038004 |
| C  | -2.9709816 | 2.2805102  | 0.0915204  |
| C  | -3.5348398 | 1.1533677  | 0.7050525  |
| C  | -2.7031045 | 0.1460634  | 1.1961401  |
| C  | -0.3361981 | -0.7167661 | 1.5532949  |
| C  | 1.0401974  | -0.4292863 | 1.3235092  |
| C  | 1.9895755  | -1.3493861 | 1.8180369  |
| C  | 1.5987860  | -2.5251865 | 2.4814980  |
| C  | 0.2347955  | -2.8085505 | 2.6814675  |
| C  | -0.7272833 | -1.9041925 | 2.2201260  |
| O  | -0.9183472 | 3.3876342  | -0.5742201 |
| H  | -3.6082712 | 3.0827651  | -0.3038207 |
| H  | -4.6300732 | 1.0672355  | 0.7956806  |
| H  | -3.1312896 | -0.7437030 | 1.6772621  |
| H  | 3.0676964  | -1.1558228 | 1.6898941  |
| H  | 2.3676865  | -3.2262140 | 2.8491260  |
| H  | -0.0759951 | -3.7294558 | 3.2012154  |
| H  | -1.7934148 | -2.1283994 | 2.3874980  |
| N  | -0.7487716 | 1.3797544  | 0.4702178  |
| H  | 1.2478329  | 2.1441806  | -2.5348533 |
| C  | 1.1781634  | 1.3641921  | -1.7754152 |
| C  | 1.0614090  | 0.1419872  | -1.4550057 |
| C  | 0.8178416  | -1.2600164 | -1.7094089 |
| C  | 0.3304515  | -3.9864540 | -2.2994260 |
| C  | 1.5879058  | -3.5794731 | -1.8181482 |
| C  | 1.8312532  | -2.2322700 | -1.5175448 |
| C  | -0.4470777 | -1.6804654 | -2.1938190 |
| C  | -0.6847403 | -3.0319935 | -2.4845658 |
| H  | 0.1423019  | -5.0482405 | -2.5298388 |
| H  | 2.3899640  | -4.3218948 | -1.6721158 |
| H  | 2.8161788  | -1.9143457 | -1.1427412 |
| H  | -1.2399391 | -0.9305886 | -2.3445678 |
| H  | -1.6733543 | -3.3420701 | -2.8625993 |
| C  | -1.6486398 | 4.5142629  | -1.0398888 |
| H  | -2.3272451 | 4.2424261  | -1.8811164 |
| H  | -0.8856423 | 5.2328984  | -1.3984561 |
| H  | -2.2390287 | 4.9844696  | -0.2201868 |

## \$vibrational spectrum

| # | mode | symmetry | wave number           | IR intensity | selection rules |
|---|------|----------|-----------------------|--------------|-----------------|
| # |      |          | cm <sup>**</sup> (-1) | km/mol       | IR RAMAN        |
|   | 1    |          | 0.00                  | 0.00000      | - -             |
|   | 2    |          | 0.00                  | 0.00000      | - -             |
|   | 3    |          | 0.00                  | 0.00000      | - -             |

|    |   |        |          |     |     |
|----|---|--------|----------|-----|-----|
| 4  |   | 0.00   | 0.00000  | -   | -   |
| 5  |   | 0.00   | 0.00000  | -   | -   |
| 6  |   | 0.00   | 0.00000  | -   | -   |
| 7  | a | 17.56  | 0.32176  | YES | YES |
| 8  | a | 30.56  | 0.34957  | YES | YES |
| 9  | a | 35.61  | 0.34595  | YES | YES |
| 10 | a | 46.86  | 0.06387  | YES | YES |
| 11 | a | 53.70  | 0.06745  | YES | YES |
| 12 | a | 73.53  | 1.80693  | YES | YES |
| 13 | a | 80.07  | 0.76770  | YES | YES |
| 14 | a | 92.33  | 0.60385  | YES | YES |
| 15 | a | 96.13  | 0.24797  | YES | YES |
| 16 | a | 101.05 | 0.13766  | YES | YES |
| 17 | a | 109.72 | 0.88510  | YES | YES |
| 18 | a | 118.53 | 0.25899  | YES | YES |
| 19 | a | 120.29 | 0.21308  | YES | YES |
| 20 | a | 126.82 | 0.65942  | YES | YES |
| 21 | a | 156.16 | 0.25574  | YES | YES |
| 22 | a | 164.73 | 0.43699  | YES | YES |
| 23 | a | 176.58 | 2.86296  | YES | YES |
| 24 | a | 184.23 | 1.52408  | YES | YES |
| 25 | a | 219.10 | 0.21957  | YES | YES |
| 26 | a | 232.13 | 1.09117  | YES | YES |
| 27 | a | 233.24 | 1.55831  | YES | YES |
| 28 | a | 263.08 | 0.18058  | YES | YES |
| 29 | a | 289.97 | 0.69181  | YES | YES |
| 30 | a | 308.04 | 0.41727  | YES | YES |
| 31 | a | 325.07 | 11.81392 | YES | YES |
| 32 | a | 334.42 | 1.62532  | YES | YES |
| 33 | a | 400.32 | 0.77081  | YES | YES |
| 34 | a | 407.09 | 10.83810 | YES | YES |
| 35 | a | 409.88 | 5.26984  | YES | YES |
| 36 | a | 430.73 | 0.31742  | YES | YES |
| 37 | a | 458.21 | 1.77025  | YES | YES |
| 38 | a | 461.90 | 4.09505  | YES | YES |
| 39 | a | 472.38 | 4.53511  | YES | YES |
| 40 | a | 482.55 | 7.02191  | YES | YES |
| 41 | a | 493.96 | 3.82026  | YES | YES |
| 42 | a | 498.09 | 3.42824  | YES | YES |
| 43 | a | 506.42 | 21.10995 | YES | YES |
| 44 | a | 508.51 | 0.81419  | YES | YES |
| 45 | a | 529.26 | 8.32951  | YES | YES |
| 46 | a | 537.81 | 17.08554 | YES | YES |
| 47 | a | 541.32 | 2.62297  | YES | YES |
| 48 | a | 568.59 | 3.32784  | YES | YES |
| 49 | a | 581.32 | 2.91337  | YES | YES |
| 50 | a | 612.10 | 26.50879 | YES | YES |

**2ga**

|                                            |                                       |
|--------------------------------------------|---------------------------------------|
| SCF Energy (au) BP86/SV(P)                 | -2508.397058357                       |
| SCF Energy (au) PBE0/def2-TZVPP            | -2507.918314687                       |
| SCF Energy (au) PBE0/def2-TZVPP            | -2507.9263616631 (Toluene Correction) |
| Zero Point Energy (au)                     | 0.3679099                             |
| Chemical Potential (kJ mol <sup>-1</sup> ) | 804.72                                |
| Dispersion Correction (au) PBE0/def2-TZVPP | -0.08238683                           |

xyz coordinates

51

|    |            |            |            |
|----|------------|------------|------------|
| Mn | 1.4627019  | -0.6136569 | 0.6719518  |
| C  | 1.9354949  | 0.0695481  | 2.2687287  |
| C  | 3.0921388  | -1.2780301 | 0.4018875  |
| C  | 1.9643077  | 0.8904391  | -0.2341898 |
| O  | 2.4492548  | 1.7919919  | -0.7928015 |
| O  | 4.1559398  | -1.7320077 | 0.2404221  |
| O  | 2.2409436  | 0.4997903  | 3.3074133  |
| C  | -1.2743036 | -1.2048065 | 1.6578451  |
| C  | -1.3235574 | 0.9260137  | 0.6467378  |
| C  | -2.7339246 | 0.9150606  | 0.6335650  |
| C  | -3.4234327 | -0.1952212 | 1.1390735  |
| C  | -2.6868249 | -1.2467250 | 1.6858767  |
| C  | -0.4209420 | -2.2522340 | 2.2349893  |
| C  | 0.9717282  | -2.1633040 | 1.9506955  |
| C  | 1.8238570  | -3.1294950 | 2.5254005  |
| C  | 1.3197737  | -4.1548839 | 3.3444704  |
| C  | -0.0604725 | -4.2411538 | 3.6088029  |
| C  | -0.9265764 | -3.2923808 | 3.0539203  |
| C  | -0.6419949 | 2.2018926  | 0.2795213  |
| H  | -3.2694568 | 1.8023754  | 0.2637775  |
| H  | -4.5254493 | -0.2231023 | 1.1354352  |
| H  | -3.1980078 | -2.1159172 | 2.1239789  |
| H  | 2.9098132  | -3.0934209 | 2.3361770  |
| H  | 2.0124835  | -4.8924719 | 3.7849519  |
| H  | -0.4575073 | -5.0421799 | 4.2535378  |
| H  | -2.0039605 | -3.3563542 | 3.2794642  |
| N  | -0.6094863 | -0.1505738 | 1.0806026  |
| C  | 0.3156615  | -0.4401438 | -2.5752413 |
| C  | 1.2673483  | 0.2390870  | -3.3774685 |
| C  | 0.8691893  | 0.8875930  | -4.5549764 |
| C  | -0.4793001 | 0.8783310  | -4.9545738 |
| C  | -1.4323542 | 0.2068282  | -4.1678224 |
| C  | -1.0430860 | -0.4459915 | -2.9889960 |
| H  | 2.3248815  | 0.2482745  | -3.0744248 |
| H  | 1.6234532  | 1.4069923  | -5.1688521 |
| H  | -0.7868842 | 1.3911799  | -5.8809002 |
| H  | -2.4908057 | 0.1869449  | -4.4772127 |
| H  | -1.7867481 | -0.9773241 | -2.3740579 |
| C  | 0.6874200  | -1.1659350 | -1.3824163 |
| C  | 0.7767075  | -2.1594344 | -0.6038190 |
| H  | 0.7188242  | -3.2323749 | -0.4197090 |
| C  | 0.4681783  | 4.7342046  | -0.2978530 |
| C  | 0.6605090  | 4.1523752  | 0.9671899  |
| C  | 0.1111930  | 2.8946908  | 1.2554809  |
| C  | -0.8466833 | 2.8017314  | -0.9816079 |
| C  | -0.2847516 | 4.0553750  | -1.2705521 |
| H  | 0.9067758  | 5.7197436  | -0.5261296 |
| H  | 1.2440403  | 4.6821833  | 1.7380140  |
| H  | 0.2553213  | 2.4465547  | 2.2516542  |
| H  | -1.4278246 | 2.2673028  | -1.7507523 |
| H  | -0.4336055 | 4.5026188  | -2.2672091 |

\$vibrational spectrum

| #  | mode | symmetry | wave number<br>cm**(-1) | IR intensity<br>km/mol | selection rules |       |
|----|------|----------|-------------------------|------------------------|-----------------|-------|
| #  |      |          |                         |                        | IR              | RAMAN |
| 1  |      |          | 0.00                    | 0.00000                | -               | -     |
| 2  |      |          | 0.00                    | 0.00000                | -               | -     |
| 3  |      |          | 0.00                    | 0.00000                | -               | -     |
| 4  |      |          | 0.00                    | 0.00000                | -               | -     |
| 5  |      |          | 0.00                    | 0.00000                | -               | -     |
| 6  |      |          | 0.00                    | 0.00000                | -               | -     |
| 7  |      | a        | 10.36                   | 0.19938                | YES             | YES   |
| 8  |      | a        | 27.51                   | 0.04880                | YES             | YES   |
| 9  |      | a        | 38.08                   | 0.05465                | YES             | YES   |
| 10 |      | a        | 42.39                   | 0.27325                | YES             | YES   |
| 11 |      | a        | 57.15                   | 0.17486                | YES             | YES   |
| 12 |      | a        | 68.93                   | 0.12536                | YES             | YES   |
| 13 |      | a        | 74.12                   | 0.12993                | YES             | YES   |
| 14 |      | a        | 75.27                   | 0.85869                | YES             | YES   |
| 15 |      | a        | 81.84                   | 0.06469                | YES             | YES   |
| 16 |      | a        | 89.05                   | 0.58480                | YES             | YES   |
| 17 |      | a        | 93.51                   | 0.42378                | YES             | YES   |
| 18 |      | a        | 111.22                  | 0.16990                | YES             | YES   |
| 19 |      | a        | 113.13                  | 0.03525                | YES             | YES   |
| 20 |      | a        | 117.12                  | 0.61225                | YES             | YES   |
| 21 |      | a        | 121.99                  | 0.37536                | YES             | YES   |
| 22 |      | a        | 139.20                  | 0.58041                | YES             | YES   |
| 23 |      | a        | 155.50                  | 4.72657                | YES             | YES   |
| 24 |      | a        | 160.00                  | 0.76063                | YES             | YES   |
| 25 |      | a        | 175.36                  | 1.07927                | YES             | YES   |
| 26 |      | a        | 210.04                  | 0.69555                | YES             | YES   |
| 27 |      | a        | 220.26                  | 0.16892                | YES             | YES   |
| 28 |      | a        | 237.95                  | 1.93218                | YES             | YES   |
| 29 |      | a        | 242.94                  | 2.19533                | YES             | YES   |
| 30 |      | a        | 294.11                  | 2.09996                | YES             | YES   |
| 31 |      | a        | 314.01                  | 0.68797                | YES             | YES   |
| 32 |      | a        | 321.10                  | 19.21421               | YES             | YES   |
| 33 |      | a        | 337.85                  | 1.48906                | YES             | YES   |
| 34 |      | a        | 372.54                  | 1.02664                | YES             | YES   |
| 35 |      | a        | 400.01                  | 0.24974                | YES             | YES   |
| 36 |      | a        | 401.56                  | 0.02427                | YES             | YES   |
| 37 |      | a        | 410.61                  | 5.14172                | YES             | YES   |
| 38 |      | a        | 431.09                  | 4.52154                | YES             | YES   |
| 39 |      | a        | 450.68                  | 15.38779               | YES             | YES   |
| 40 |      | a        | 459.24                  | 1.28575                | YES             | YES   |
| 41 |      | a        | 465.75                  | 4.47669                | YES             | YES   |
| 42 |      | a        | 476.92                  | 5.61536                | YES             | YES   |
| 43 |      | a        | 477.59                  | 5.69098                | YES             | YES   |
| 44 |      | a        | 489.88                  | 4.79517                | YES             | YES   |
| 45 |      | a        | 498.86                  | 8.36890                | YES             | YES   |
| 46 |      | a        | 505.49                  | 15.89184               | YES             | YES   |
| 47 |      | a        | 512.07                  | 0.41507                | YES             | YES   |
| 48 |      | a        | 525.04                  | 22.93634               | YES             | YES   |
| 49 |      | a        | 539.12                  | 9.81531                | YES             | YES   |
| 50 |      | a        | 545.76                  | 4.36875                | YES             | YES   |

**2ga'**

|                                            |                                       |
|--------------------------------------------|---------------------------------------|
| SCF Energy (au) BP86/SV(P)                 | -2508.396040454                       |
| SCF Energy (au) PBE0/def2-TZVPP            | -2507.916677625                       |
| SCF Energy (au) PBE0/def2-TZVPP            | -2507.9248487015 (Toluene Correction) |
| Zero Point Energy (au)                     | 0.3677349                             |
| Chemical Potential (kJ mol <sup>-1</sup> ) | 803.07                                |
| Dispersion Correction (au) PBE0/def2-TZVPP | -0.08281505                           |

xyz coordinates

51

|    |            |            |            |
|----|------------|------------|------------|
| Mn | 1.4391057  | 0.6238850  | 0.2962395  |
| C  | 1.6057090  | 1.2800530  | 1.9682203  |
| C  | 3.1384581  | 0.0991255  | 0.2177723  |
| C  | 1.9242572  | 2.2136855  | -0.4425164 |
| O  | 2.3853360  | 3.1769319  | -0.9117753 |
| O  | 4.2454900  | -0.2706716 | 0.1786023  |
| O  | 1.7088666  | 1.7165425  | 3.0427783  |
| C  | -1.3073847 | -0.3107272 | 0.9690128  |
| C  | -1.5041005 | 1.7935720  | -0.0768454 |
| C  | -2.8934610 | 1.6153724  | -0.2371849 |
| C  | -3.4956725 | 0.4332819  | 0.2151002  |
| C  | -2.6999867 | -0.5227177 | 0.8463202  |
| C  | -0.4005191 | -1.2565522 | 1.6317917  |
| C  | 0.9936664  | -1.0095990 | 1.4871117  |
| C  | 1.8834806  | -1.8698532 | 2.1640286  |
| C  | 1.4185878  | -2.9515258 | 2.9324487  |
| C  | 0.0385806  | -3.1996671 | 3.0476429  |
| C  | -0.8663112 | -2.3526857 | 2.3985808  |
| C  | -0.9366685 | 3.1277568  | -0.4318752 |
| H  | -3.4886153 | 2.4275855  | -0.6811821 |
| H  | -4.5799235 | 0.2729178  | 0.0967109  |
| H  | -3.1447986 | -1.4512244 | 1.2310743  |
| H  | 2.9721522  | -1.7048341 | 2.1004869  |
| H  | 2.1417944  | -3.6047800 | 3.4502864  |
| H  | -0.3304881 | -4.0452930 | 3.6506908  |
| H  | -1.9468188 | -2.5412764 | 2.5099494  |
| N  | -0.7183081 | 0.8205497  | 0.4609888  |
| H  | 1.1918898  | 1.0978682  | -2.6496469 |
| C  | 1.1094174  | 0.4155304  | -1.8019133 |
| C  | 0.9619543  | -0.7563221 | -1.3339748 |
| C  | 0.6429493  | -2.1626103 | -1.4536003 |
| C  | 0.0072647  | -4.9014407 | -1.7918630 |
| C  | 1.2330252  | -4.5245521 | -1.2139585 |
| C  | 1.5483836  | -3.1703207 | -1.0374688 |
| C  | -0.5901544 | -2.5528379 | -2.0368187 |
| C  | -0.9018073 | -3.9104278 | -2.2019866 |
| H  | -0.2391899 | -5.9682252 | -1.9226733 |
| H  | 1.9521015  | -5.2959201 | -0.8921393 |
| H  | 2.5079090  | -2.8774387 | -0.5853995 |
| H  | -1.2990600 | -1.7747098 | -2.3615368 |
| H  | -1.8639889 | -4.1971431 | -2.6585568 |
| C  | -0.0654151 | 5.7462825  | -1.0362026 |
| C  | 0.0314850  | 5.2560744  | 0.2776686  |
| C  | -0.3981314 | 3.9555611  | 0.5794579  |
| C  | -1.0496012 | 3.6351764  | -1.7444527 |
| C  | -0.6052271 | 4.9326472  | -2.0465734 |
| H  | 0.2807037  | 6.7657957  | -1.2734075 |
| H  | 0.4487774  | 5.8915806  | 1.0758772  |
| H  | -0.3250503 | 3.5756515  | 1.6111820  |
| H  | -1.4787104 | 2.9993103  | -2.5369369 |
| H  | -0.6819526 | 5.3106181  | -3.0795345 |

\$vibrational spectrum

| #  | mode | symmetry | wave number<br>cm**(-1) | IR intensity<br>km/mol | selection rules |       |
|----|------|----------|-------------------------|------------------------|-----------------|-------|
| #  |      |          |                         |                        | IR              | RAMAN |
| 1  |      |          | 0.00                    | 0.00000                | -               | -     |
| 2  |      |          | 0.00                    | 0.00000                | -               | -     |
| 3  |      |          | 0.00                    | 0.00000                | -               | -     |
| 4  |      |          | 0.00                    | 0.00000                | -               | -     |
| 5  |      |          | 0.00                    | 0.00000                | -               | -     |
| 6  |      |          | 0.00                    | 0.00000                | -               | -     |
| 7  |      | a        | 14.68                   | 0.02458                | YES             | YES   |
| 8  |      | a        | 20.00                   | 0.02170                | YES             | YES   |
| 9  |      | a        | 26.94                   | 0.27393                | YES             | YES   |
| 10 |      | a        | 44.89                   | 0.09041                | YES             | YES   |
| 11 |      | a        | 52.65                   | 0.10546                | YES             | YES   |
| 12 |      | a        | 55.18                   | 0.14935                | YES             | YES   |
| 13 |      | a        | 68.98                   | 0.10168                | YES             | YES   |
| 14 |      | a        | 75.19                   | 0.90378                | YES             | YES   |
| 15 |      | a        | 80.23                   | 0.43735                | YES             | YES   |
| 16 |      | a        | 95.98                   | 0.04786                | YES             | YES   |
| 17 |      | a        | 96.61                   | 0.15507                | YES             | YES   |
| 18 |      | a        | 105.08                  | 0.15543                | YES             | YES   |
| 19 |      | a        | 111.34                  | 0.29671                | YES             | YES   |
| 20 |      | a        | 118.14                  | 0.38801                | YES             | YES   |
| 21 |      | a        | 124.61                  | 0.95451                | YES             | YES   |
| 22 |      | a        | 137.24                  | 0.09103                | YES             | YES   |
| 23 |      | a        | 158.46                  | 0.86799                | YES             | YES   |
| 24 |      | a        | 174.47                  | 1.38164                | YES             | YES   |
| 25 |      | a        | 183.09                  | 1.57158                | YES             | YES   |
| 26 |      | a        | 200.25                  | 0.43881                | YES             | YES   |
| 27 |      | a        | 216.64                  | 0.84383                | YES             | YES   |
| 28 |      | a        | 229.46                  | 1.29740                | YES             | YES   |
| 29 |      | a        | 240.10                  | 0.08552                | YES             | YES   |
| 30 |      | a        | 297.63                  | 0.15925                | YES             | YES   |
| 31 |      | a        | 311.68                  | 0.62241                | YES             | YES   |
| 32 |      | a        | 330.86                  | 11.24064               | YES             | YES   |
| 33 |      | a        | 337.66                  | 1.74335                | YES             | YES   |
| 34 |      | a        | 370.52                  | 1.39688                | YES             | YES   |
| 35 |      | a        | 399.39                  | 0.24768                | YES             | YES   |
| 36 |      | a        | 399.93                  | 0.79518                | YES             | YES   |
| 37 |      | a        | 407.82                  | 14.42548               | YES             | YES   |
| 38 |      | a        | 426.95                  | 0.94010                | YES             | YES   |
| 39 |      | a        | 453.00                  | 0.03982                | YES             | YES   |
| 40 |      | a        | 459.14                  | 3.39036                | YES             | YES   |
| 41 |      | a        | 462.50                  | 8.72856                | YES             | YES   |
| 42 |      | a        | 476.80                  | 6.22106                | YES             | YES   |
| 43 |      | a        | 481.75                  | 0.17525                | YES             | YES   |
| 44 |      | a        | 490.98                  | 5.09356                | YES             | YES   |
| 45 |      | a        | 499.22                  | 0.51778                | YES             | YES   |
| 46 |      | a        | 505.01                  | 18.43589               | YES             | YES   |
| 47 |      | a        | 512.38                  | 4.66827                | YES             | YES   |
| 48 |      | a        | 531.55                  | 4.58873                | YES             | YES   |
| 49 |      | a        | 541.02                  | 12.91639               | YES             | YES   |
| 50 |      | a        | 549.53                  | 3.33764                | YES             | YES   |



**2ha**

SCF Energy (au) BP86/SV(P) -2354.867702753  
 SCF Energy (au) PBE0/def2-TZVPP -2354.415337120  
 SCF Energy (au) PBE0/def2-TZVPP -2354.4233622997 (Toluene Correction)  
 Zero Point Energy (au) 0.3227920  
 Chemical Potential (kJ mol<sup>-1</sup>) 692.09  
 Dispersion Correction (au) PBE0/def2-TZVPP -0.06448300

xyz coordinates

45

|    |            |            |            |
|----|------------|------------|------------|
| Mn | 1.9844632  | 0.3615964  | 0.2805713  |
| C  | 2.4729053  | 0.7706078  | 1.9633091  |
| C  | 3.6802028  | -0.0913158 | -0.1161913 |
| C  | 2.1691997  | 2.0841028  | -0.2778616 |
| O  | 2.2954408  | 3.2028442  | -0.5801308 |
| O  | 4.7776609  | -0.3989431 | -0.3667064 |
| O  | 2.7934382  | 1.0254737  | 3.0533302  |
| C  | -0.6474250 | -0.2993731 | 1.3472536  |
| C  | -2.0987172 | -0.1416954 | 1.6399885  |
| C  | 0.1625301  | -1.4533976 | 1.7369729  |
| C  | 1.5284218  | -1.3774515 | 1.3141167  |
| C  | 2.3774492  | -2.4442437 | 1.6743531  |
| C  | 1.8981386  | -3.5411240 | 2.4143880  |
| C  | 0.5545604  | -3.5942075 | 2.8362105  |
| C  | -0.3123366 | -2.5468645 | 2.5030714  |
| H  | 3.4404841  | -2.4287957 | 1.3790219  |
| H  | 2.5876445  | -4.3616677 | 2.6781061  |
| H  | 0.1908380  | -4.4464731 | 3.4329670  |
| H  | -1.3580410 | -2.5659727 | 2.8511029  |
| N  | 0.0191421  | 0.6347120  | 0.7090967  |
| C  | 0.9878452  | 1.0097481  | -2.9360200 |
| C  | 1.9878718  | 1.7884232  | -3.5718213 |
| C  | 1.6561809  | 2.6351458  | -4.6380820 |
| C  | 0.3254007  | 2.7326849  | -5.0831244 |
| C  | -0.6758427 | 1.9707337  | -4.4556397 |
| C  | -0.3522845 | 1.1163009  | -3.3916256 |
| H  | 3.0304467  | 1.7157479  | -3.2248581 |
| H  | 2.4468762  | 3.2286812  | -5.1259904 |
| H  | 0.0691267  | 3.4043029  | -5.9190083 |
| H  | -1.7212712 | 2.0399266  | -4.7997030 |
| H  | -1.1341259 | 0.5134927  | -2.9024547 |
| C  | 1.3062087  | 0.0918749  | -1.8676401 |
| C  | 1.4093925  | -1.0031709 | -1.2426333 |
| H  | 1.3803549  | -2.0928587 | -1.2210400 |
| C  | -4.8598289 | 0.2380123  | 2.1238249  |
| C  | -4.4023850 | -0.9573970 | 1.5420035  |
| C  | -3.0322054 | -1.1508820 | 1.3058817  |
| C  | -2.5709113 | 1.0600181  | 2.2188912  |
| C  | -3.9402320 | 1.2457316  | 2.4628171  |
| H  | -5.9358974 | 0.3841697  | 2.3141531  |
| H  | -5.1204428 | -1.7467476 | 1.2648043  |
| H  | -2.6820451 | -2.0814766 | 0.8311990  |
| H  | -1.8499617 | 1.8443132  | 2.5038226  |
| H  | -4.2907055 | 2.1823146  | 2.9268384  |
| H  | -0.5475650 | 1.4430989  | 0.4124348  |

\$vibrational spectrum

| # | mode | symmetry | wave number | IR intensity | selection rules |
|---|------|----------|-------------|--------------|-----------------|
| # |      |          | cm**(-1)    | km/mol       | IR RAMAN        |
|   | 1    |          | 0.00        | 0.00000      | - -             |
|   | 2    |          | 0.00        | 0.00000      | - -             |
|   | 3    |          | 0.00        | 0.00000      | - -             |

|    |   |        |          |     |     |
|----|---|--------|----------|-----|-----|
| 4  |   | 0.00   | 0.00000  | -   | -   |
| 5  |   | 0.00   | 0.00000  | -   | -   |
| 6  |   | 0.00   | 0.00000  | -   | -   |
| 7  | a | 13.29  | 0.15192  | YES | YES |
| 8  | a | 23.03  | 0.07633  | YES | YES |
| 9  | a | 33.10  | 0.10247  | YES | YES |
| 10 | a | 43.98  | 0.05862  | YES | YES |
| 11 | a | 51.74  | 0.15394  | YES | YES |
| 12 | a | 61.36  | 0.17907  | YES | YES |
| 13 | a | 71.43  | 0.28741  | YES | YES |
| 14 | a | 78.72  | 0.06019  | YES | YES |
| 15 | a | 85.78  | 0.82130  | YES | YES |
| 16 | a | 91.19  | 0.05240  | YES | YES |
| 17 | a | 99.69  | 0.24511  | YES | YES |
| 18 | a | 109.24 | 0.33295  | YES | YES |
| 19 | a | 115.10 | 0.66219  | YES | YES |
| 20 | a | 126.70 | 0.21360  | YES | YES |
| 21 | a | 150.72 | 0.94188  | YES | YES |
| 22 | a | 160.87 | 5.74710  | YES | YES |
| 23 | a | 185.99 | 0.60228  | YES | YES |
| 24 | a | 204.17 | 1.78023  | YES | YES |
| 25 | a | 214.52 | 2.04916  | YES | YES |
| 26 | a | 236.75 | 1.95956  | YES | YES |
| 27 | a | 274.26 | 2.42220  | YES | YES |
| 28 | a | 308.38 | 1.57647  | YES | YES |
| 29 | a | 317.62 | 23.99863 | YES | YES |
| 30 | a | 353.85 | 0.52186  | YES | YES |
| 31 | a | 399.49 | 0.02689  | YES | YES |
| 32 | a | 403.76 | 0.21821  | YES | YES |
| 33 | a | 410.32 | 4.31237  | YES | YES |
| 34 | a | 421.74 | 6.72909  | YES | YES |
| 35 | a | 446.90 | 9.46617  | YES | YES |
| 36 | a | 451.86 | 1.39235  | YES | YES |
| 37 | a | 464.55 | 11.74879 | YES | YES |
| 38 | a | 477.59 | 6.21398  | YES | YES |
| 39 | a | 488.60 | 4.57895  | YES | YES |
| 40 | a | 490.74 | 0.53493  | YES | YES |
| 41 | a | 495.96 | 12.78844 | YES | YES |
| 42 | a | 501.78 | 3.93526  | YES | YES |
| 43 | a | 503.02 | 13.71281 | YES | YES |
| 44 | a | 524.14 | 33.20199 | YES | YES |
| 45 | a | 536.84 | 10.50917 | YES | YES |
| 46 | a | 546.50 | 11.89717 | YES | YES |
| 47 | a | 584.32 | 10.55322 | YES | YES |
| 48 | a | 609.23 | 6.23246  | YES | YES |
| 49 | a | 611.60 | 6.04316  | YES | YES |
| 50 | a | 618.08 | 26.29849 | YES | YES |

**2ha'**

```

SCF Energy (au) BP86/SV(P) -2354.864921936
SCF Energy (au) PBE0/def2-TZVPP -2354.412686755
SCF Energy (au) PBE0/def2-TZVPP -2354.4205956618 (Toluene Correction)
Zero Point Energy (au) 0.3226891
Chemical Potential (kJ mol-1) 689.13
Dispersion Correction (au) PBE0/def2-TZVPP -0.06741741

```

## xyz coordinates

45

```

Mn 1.7370355 1.9156621 -0.0185669
C 1.9577555 2.3012045 1.7280394
C 3.5025465 1.6204490 -0.1985573
C 1.8152550 3.6694973 -0.4796261
O 1.8576291 4.8024604 -0.7541614
O 4.6427294 1.3986452 -0.3138999
O 2.1139695 2.5589014 2.8526198
C -0.9128298 0.9532138 0.7371207
C -0.0320248 -0.1264507 1.1817887
C 1.3579263 0.1145890 0.9381381
C 2.2687341 -0.8681919 1.3733419
C 1.8252121 -2.0586472 1.9791169
C 0.4511831 -2.3013110 2.1698957
C -0.4790054 -1.3349730 1.7693790
H 3.3531148 -0.7201772 1.2347946
H 2.5643202 -2.8133496 2.2986332
H 0.1092259 -3.2436898 2.6277984
H -1.5577047 -1.5208744 1.8999189
N -0.2877921 1.9497253 0.1541413
H 1.4157086 2.6883447 -2.9025956
C 1.4505005 1.8998432 -2.1490172
C 1.4570271 0.6712439 -1.8394499
C 1.3933284 -0.7536490 -2.0724049
C 1.2754370 -3.5277641 -2.6245405
C 2.5071684 -2.9174475 -2.3265894
C 2.5693084 -1.5455561 -2.0451657
C 0.1564402 -1.3787876 -2.3703728
C 0.1022075 -2.7536656 -2.6432421
H 1.2301733 -4.6077036 -2.8416829
H 3.4320346 -3.5175530 -2.3114330
H 3.5339045 -1.0675370 -1.8131480
H -0.7618670 -0.7708876 -2.3936988
H -0.8675413 -3.2241721 -2.8760245
C -2.3914229 0.9752072 0.9151925
C -5.1970723 1.1358492 1.2411788
C -4.3749026 0.8234653 2.3378931
C -2.9827916 0.7378493 2.1781861
C -3.2278479 1.2961468 -0.1798602
C -4.6198514 1.3707898 -0.0187747
H -6.2904248 1.1971927 1.3691612
H -4.8210463 0.6497995 3.3310303
H -2.3425002 0.5151240 3.0466631
H -2.7787729 1.4666498 -1.1727490
H -5.2587493 1.6098494 -0.8848484
H -0.8957280 2.7306852 -0.1336224

```

## \$vibrational spectrum

| # | mode | symmetry | wave number<br>cm <sup>**</sup> (-1) | IR intensity<br>km/mol | selection rules<br>IR RAMAN |
|---|------|----------|--------------------------------------|------------------------|-----------------------------|
| # |      |          |                                      |                        |                             |
|   | 1    |          | 0.00                                 | 0.00000                | - -                         |
|   | 2    |          | 0.00                                 | 0.00000                | - -                         |
|   | 3    |          | 0.00                                 | 0.00000                | - -                         |

|    |   |        |          |     |     |
|----|---|--------|----------|-----|-----|
| 4  |   | 0.00   | 0.00000  | -   | -   |
| 5  |   | 0.00   | 0.00000  | -   | -   |
| 6  |   | 0.00   | 0.00000  | -   | -   |
| 7  | a | 5.23   | 0.02192  | YES | YES |
| 8  | a | 16.44  | 0.10699  | YES | YES |
| 9  | a | 38.20  | 0.10104  | YES | YES |
| 10 | a | 42.72  | 0.17829  | YES | YES |
| 11 | a | 54.28  | 0.13952  | YES | YES |
| 12 | a | 54.98  | 0.02477  | YES | YES |
| 13 | a | 69.67  | 0.51001  | YES | YES |
| 14 | a | 79.26  | 0.02376  | YES | YES |
| 15 | a | 85.42  | 0.70115  | YES | YES |
| 16 | a | 94.94  | 0.21828  | YES | YES |
| 17 | a | 99.78  | 0.07365  | YES | YES |
| 18 | a | 104.02 | 0.58385  | YES | YES |
| 19 | a | 112.90 | 0.20273  | YES | YES |
| 20 | a | 127.26 | 0.35518  | YES | YES |
| 21 | a | 157.98 | 1.20516  | YES | YES |
| 22 | a | 169.08 | 0.84161  | YES | YES |
| 23 | a | 175.46 | 2.55549  | YES | YES |
| 24 | a | 203.10 | 0.94757  | YES | YES |
| 25 | a | 216.55 | 1.45099  | YES | YES |
| 26 | a | 229.83 | 0.29463  | YES | YES |
| 27 | a | 272.63 | 3.00912  | YES | YES |
| 28 | a | 305.65 | 0.53639  | YES | YES |
| 29 | a | 312.82 | 13.43462 | YES | YES |
| 30 | a | 353.75 | 0.62675  | YES | YES |
| 31 | a | 397.88 | 2.80142  | YES | YES |
| 32 | a | 400.74 | 9.57004  | YES | YES |
| 33 | a | 404.39 | 1.69232  | YES | YES |
| 34 | a | 419.99 | 0.68333  | YES | YES |
| 35 | a | 447.42 | 0.40847  | YES | YES |
| 36 | a | 455.05 | 2.94910  | YES | YES |
| 37 | a | 471.57 | 3.81417  | YES | YES |
| 38 | a | 482.56 | 9.46046  | YES | YES |
| 39 | a | 483.31 | 3.76855  | YES | YES |
| 40 | a | 490.41 | 6.60203  | YES | YES |
| 41 | a | 496.41 | 2.36391  | YES | YES |
| 42 | a | 499.52 | 17.06561 | YES | YES |
| 43 | a | 504.97 | 7.12513  | YES | YES |
| 44 | a | 520.67 | 15.02069 | YES | YES |
| 45 | a | 535.37 | 8.58747  | YES | YES |
| 46 | a | 560.04 | 8.32210  | YES | YES |
| 47 | a | 586.03 | 3.19765  | YES | YES |
| 48 | a | 610.13 | 0.63566  | YES | YES |
| 49 | a | 612.40 | 6.56616  | YES | YES |
| 50 | a | 619.97 | 64.61582 | YES | YES |

2ia

SCF Energy (au) BP86/SV(P) -2183.122606432  
 SCF Energy (au) PBE0/def2-TZVPP -2182.706625903  
 SCF Energy (au) PBE0/def2-TZVPP -2182.7132650811 (Toluene Correction)  
 Zero Point Energy (au) 0.2582288  
 Chemical Potential (kJ mol<sup>-1</sup>) 536.57  
 Dispersion Correction (au) PBE0/def2-TZVPP -0.05063461

xyz coordinates  
 37

|    |            |            |            |
|----|------------|------------|------------|
| Mn | 1.0276323  | 0.3512433  | 0.9392188  |
| C  | 1.1370934  | 0.6341023  | 2.7177790  |
| C  | 2.7601907  | -0.0495923 | 0.8708951  |
| C  | 1.3101813  | 2.1264881  | 0.5941055  |
| O  | 1.5153634  | 3.2602778  | 0.4386312  |
| O  | 3.8873994  | -0.3513020 | 0.8262138  |
| O  | 1.2212734  | 0.7993244  | 3.8667371  |
| C  | -1.7321304 | -0.3567563 | 1.3365823  |
| C  | -3.2367423 | -0.2400642 | 1.3456914  |
| C  | -1.0221630 | -1.5557674 | 1.7671824  |
| C  | 0.4036238  | -1.4598931 | 1.6766759  |
| C  | 1.1509095  | -2.5788773 | 2.1038483  |
| C  | 0.5148944  | -3.7386671 | 2.5790587  |
| C  | -0.8932832 | -3.8219904 | 2.6497290  |
| C  | -1.6626598 | -2.7286071 | 2.2444057  |
| H  | 2.2532812  | -2.5552050 | 2.0663755  |
| H  | 1.1268527  | -4.5975959 | 2.9050630  |
| H  | -1.3780831 | -4.7378682 | 3.0247820  |
| H  | -2.7632359 | -2.7795799 | 2.2979940  |
| O  | -1.0463227 | 0.6258788  | 0.9473827  |
| C  | 0.5587890  | 1.3296505  | -2.2859772 |
| C  | 1.3550578  | 1.2794408  | -3.4595080 |
| C  | 1.1786239  | 2.2285641  | -4.4762772 |
| C  | 0.2087685  | 3.2381839  | -4.3436773 |
| C  | -0.5854823 | 3.2952924  | -3.1842105 |
| C  | -0.4119255 | 2.3550292  | -2.1598384 |
| H  | 2.1150387  | 0.4882493  | -3.5600353 |
| H  | 1.8061901  | 2.1801339  | -5.3817235 |
| H  | 0.0737329  | 3.9844462  | -5.1440526 |
| H  | -1.3470002 | 4.0851299  | -3.0747019 |
| H  | -1.0301008 | 2.3943804  | -1.2493785 |
| C  | 0.7254424  | 0.3200752  | -1.2659808 |
| C  | 0.8311265  | -0.8453558 | -0.7786278 |
| H  | 0.8181768  | -1.9306874 | -0.8852514 |
| H  | -3.5372666 | 0.7642561  | 0.9869631  |
| H  | -3.6380547 | -0.3971449 | 2.3717041  |
| H  | -3.6951916 | -1.0151920 | 0.6922219  |

| # | mode | symmetry | wave number | IR intensity | selection rules |       |
|---|------|----------|-------------|--------------|-----------------|-------|
| # |      |          | cm**(-1)    | km/mol       | IR              | RAMAN |
|   | 1    |          | 0.00        | 0.00000      | -               | -     |
|   | 2    |          | 0.00        | 0.00000      | -               | -     |
|   | 3    |          | 0.00        | 0.00000      | -               | -     |
|   | 4    |          | 0.00        | 0.00000      | -               | -     |
|   | 5    |          | 0.00        | 0.00000      | -               | -     |
|   | 6    |          | 0.00        | 0.00000      | -               | -     |
|   | 7    | a        | 22.87       | 0.42459      | YES             | YES   |
|   | 8    | a        | 33.85       | 0.18411      | YES             | YES   |
|   | 9    | a        | 46.95       | 0.12673      | YES             | YES   |
|   | 10   | a        | 57.10       | 0.04978      | YES             | YES   |
|   | 11   | a        | 67.42       | 0.90009      | YES             | YES   |

|    |   |        |          |     |     |
|----|---|--------|----------|-----|-----|
| 12 | a | 77.84  | 0.13583  | YES | YES |
| 13 | a | 88.20  | 0.66367  | YES | YES |
| 14 | a | 95.47  | 0.27775  | YES | YES |
| 15 | a | 106.01 | 0.31080  | YES | YES |
| 16 | a | 109.13 | 0.52012  | YES | YES |
| 17 | a | 117.66 | 0.08236  | YES | YES |
| 18 | a | 119.11 | 0.12682  | YES | YES |
| 19 | a | 132.46 | 0.08321  | YES | YES |
| 20 | a | 169.13 | 3.07848  | YES | YES |
| 21 | a | 170.62 | 1.97929  | YES | YES |
| 22 | a | 210.75 | 1.15734  | YES | YES |
| 23 | a | 222.46 | 1.43356  | YES | YES |
| 24 | a | 242.47 | 1.64021  | YES | YES |
| 25 | a | 254.89 | 0.37087  | YES | YES |
| 26 | a | 288.22 | 0.78470  | YES | YES |
| 27 | a | 325.61 | 19.55637 | YES | YES |
| 28 | a | 402.00 | 0.15435  | YES | YES |
| 29 | a | 405.50 | 0.34124  | YES | YES |
| 30 | a | 411.25 | 1.72472  | YES | YES |
| 31 | a | 418.63 | 4.36502  | YES | YES |
| 32 | a | 440.28 | 9.11232  | YES | YES |
| 33 | a | 459.61 | 9.70023  | YES | YES |
| 34 | a | 470.59 | 1.75045  | YES | YES |
| 35 | a | 477.20 | 2.96730  | YES | YES |
| 36 | a | 488.01 | 10.85217 | YES | YES |
| 37 | a | 495.04 | 2.33308  | YES | YES |
| 38 | a | 505.71 | 2.73942  | YES | YES |
| 39 | a | 519.54 | 19.67222 | YES | YES |
| 40 | a | 524.75 | 36.41111 | YES | YES |
| 41 | a | 536.80 | 13.03176 | YES | YES |
| 42 | a | 548.38 | 3.82310  | YES | YES |
| 43 | a | 600.77 | 14.13686 | YES | YES |
| 44 | a | 608.60 | 4.43846  | YES | YES |
| 45 | a | 610.84 | 39.97431 | YES | YES |
| 46 | a | 613.49 | 3.98419  | YES | YES |
| 47 | a | 633.19 | 2.48601  | YES | YES |
| 48 | a | 649.36 | 55.39115 | YES | YES |
| 49 | a | 661.00 | 16.37113 | YES | YES |
| 50 | a | 677.34 | 63.83913 | YES | YES |

2ia'

SCF Energy (au) BP86/SV(P) -2183.119255411  
 SCF Energy (au) PBE0/def2-TZVPP -2182.703507634  
 SCF Energy (au) PBE0/def2-TZVPP -2182.7102422094 (Toluene Correction)  
 Zero Point Energy (au) 0.2582085  
 Chemical Potential (kJ mol<sup>-1</sup>) 535.77  
 Dispersion Correction (au) PBE0/def2-TZVPP -0.05302657

xyz coordinates  
 37

|    |            |            |            |
|----|------------|------------|------------|
| Mn | 0.8983506  | 2.1448421  | 0.2688325  |
| C  | 0.9141654  | 2.6039852  | 2.0158285  |
| C  | 2.6524396  | 1.8402962  | 0.2910139  |
| C  | 1.0410226  | 3.8978391  | -0.2149611 |
| O  | 1.1379995  | 5.0217186  | -0.4998359 |
| O  | 3.7932662  | 1.5904865  | 0.3081505  |
| O  | 0.9364859  | 2.9056166  | 3.1391041  |
| C  | -1.8075626 | 1.2690843  | 0.7174211  |
| C  | -3.3169564 | 1.2705979  | 0.7003573  |
| C  | -1.0157638 | 0.1978747  | 1.3120318  |
| C  | 0.3991048  | 0.3910100  | 1.2188449  |
| C  | 1.2199172  | -0.5869534 | 1.8179770  |
| C  | 0.6658534  | -1.7165200 | 2.4456782  |
| C  | -0.7312506 | -1.9033912 | 2.5086360  |
| C  | -1.5737069 | -0.9425776 | 1.9432115  |
| H  | 2.3172948  | -0.4767215 | 1.8023292  |
| H  | 1.3356915  | -2.4674974 | 2.8992107  |
| H  | -1.1522350 | -2.7932599 | 3.0039253  |
| H  | -2.6680678 | -1.0712190 | 1.9941553  |
| O  | -1.1936215 | 2.2423079  | 0.2064007  |
| H  | 0.8117751  | 2.8996123  | -2.6174311 |
| C  | 0.7709592  | 2.1278030  | -1.8471192 |
| C  | 0.7261974  | 0.9043305  | -1.5060129 |
| C  | 0.5963222  | -0.5095824 | -1.7921790 |
| H  | -3.6832412 | 2.1744501  | 0.1742166  |
| H  | -3.7192499 | 1.2647297  | 1.7380287  |
| H  | -3.7087963 | 0.3619751  | 0.1922516  |
| C  | 0.3439853  | -3.2490311 | -2.4608312 |
| C  | -0.6892896 | -2.3484622 | -2.7736553 |
| C  | -0.5671662 | -0.9900332 | -2.4453026 |
| C  | 1.6281109  | -1.4273549 | -1.4744203 |
| C  | 1.5025775  | -2.7816281 | -1.8145887 |
| H  | 0.2475396  | -4.3157889 | -2.7222773 |
| H  | -1.5990167 | -2.7059184 | -3.2843124 |
| H  | -1.3704902 | -0.2800854 | -2.6988473 |
| H  | 2.5380412  | -1.0612958 | -0.9746253 |
| H  | 2.3193148  | -3.4812396 | -1.5712059 |

| # | mode | symmetry | wave number | IR intensity | selection rules |       |
|---|------|----------|-------------|--------------|-----------------|-------|
| # |      |          | cm**(-1)    | km/mol       | IR              | RAMAN |
|   | 1    |          | 0.00        | 0.00000      | -               | -     |
|   | 2    |          | 0.00        | 0.00000      | -               | -     |
|   | 3    |          | 0.00        | 0.00000      | -               | -     |
|   | 4    |          | 0.00        | 0.00000      | -               | -     |
|   | 5    |          | 0.00        | 0.00000      | -               | -     |
|   | 6    |          | 0.00        | 0.00000      | -               | -     |
|   | 7    | a        | 16.26       | 0.07232      | YES             | YES   |
|   | 8    | a        | 27.27       | 0.39170      | YES             | YES   |
|   | 9    | a        | 49.44       | 0.19270      | YES             | YES   |
|   | 10   | a        | 59.02       | 0.06082      | YES             | YES   |
|   | 11   | a        | 63.52       | 0.04027      | YES             | YES   |

|    |   |        |          |     |     |
|----|---|--------|----------|-----|-----|
| 12 | a | 73.78  | 1.26466  | YES | YES |
| 13 | a | 88.99  | 0.65309  | YES | YES |
| 14 | a | 97.88  | 0.16892  | YES | YES |
| 15 | a | 104.69 | 0.28633  | YES | YES |
| 16 | a | 115.69 | 0.22641  | YES | YES |
| 17 | a | 117.80 | 0.85020  | YES | YES |
| 18 | a | 127.98 | 0.10742  | YES | YES |
| 19 | a | 131.86 | 0.42863  | YES | YES |
| 20 | a | 165.40 | 1.61920  | YES | YES |
| 21 | a | 182.02 | 1.60815  | YES | YES |
| 22 | a | 201.91 | 0.59779  | YES | YES |
| 23 | a | 222.49 | 1.74088  | YES | YES |
| 24 | a | 231.59 | 1.17169  | YES | YES |
| 25 | a | 254.48 | 0.63146  | YES | YES |
| 26 | a | 291.18 | 0.61839  | YES | YES |
| 27 | a | 328.62 | 12.16511 | YES | YES |
| 28 | a | 400.08 | 0.31887  | YES | YES |
| 29 | a | 406.66 | 6.49271  | YES | YES |
| 30 | a | 409.60 | 3.66119  | YES | YES |
| 31 | a | 416.98 | 3.55152  | YES | YES |
| 32 | a | 450.74 | 2.33025  | YES | YES |
| 33 | a | 460.02 | 1.33503  | YES | YES |
| 34 | a | 470.60 | 3.95403  | YES | YES |
| 35 | a | 478.52 | 6.71100  | YES | YES |
| 36 | a | 492.43 | 11.27503 | YES | YES |
| 37 | a | 497.15 | 3.54688  | YES | YES |
| 38 | a | 502.61 | 9.37704  | YES | YES |
| 39 | a | 511.36 | 10.56242 | YES | YES |
| 40 | a | 526.42 | 16.87395 | YES | YES |
| 41 | a | 535.87 | 6.33441  | YES | YES |
| 42 | a | 566.15 | 5.67608  | YES | YES |
| 43 | a | 601.71 | 15.77670 | YES | YES |
| 44 | a | 608.29 | 5.91649  | YES | YES |
| 45 | a | 612.50 | 14.51577 | YES | YES |
| 46 | a | 616.09 | 56.93462 | YES | YES |
| 47 | a | 633.33 | 2.95790  | YES | YES |
| 48 | a | 647.28 | 41.26479 | YES | YES |
| 49 | a | 652.92 | 19.21428 | YES | YES |
| 50 | a | 679.40 | 77.09036 | YES | YES |



**2ja**

|                                            |                                       |
|--------------------------------------------|---------------------------------------|
| SCF Energy (au) BP86/SV(P)                 | -2452.080768239                       |
| SCF Energy (au) PBE0/def2-TZVPP            | -2451.620892726                       |
| SCF Energy (au) PBE0/def2-TZVPP            | -2451.6286920118 (Toluene Correction) |
| Zero Point Energy (au)                     | 0.3431713                             |
| Chemical Potential (kJ mol <sup>-1</sup> ) | 738.84                                |
| Dispersion Correction (au) PBE0/def2-TZVPP | -0.06762876                           |

xyz coordinates

48

|    |            |            |            |
|----|------------|------------|------------|
| Mn | 1.3428078  | 0.8045502  | 0.5807547  |
| C  | 1.3783701  | 1.2227344  | 2.3336199  |
| C  | 3.1025940  | 0.4977164  | 0.5670520  |
| C  | 1.5688369  | 2.5632149  | 0.1210029  |
| O  | 1.7224449  | 3.6913483  | -0.1112692 |
| O  | 4.2521930  | 0.2995053  | 0.5355771  |
| O  | 1.4098099  | 1.4889051  | 3.4667047  |
| C  | -1.3953526 | 0.0611476  | 0.8785204  |
| C  | -2.8797304 | 0.1605952  | 0.8509716  |
| C  | -0.6783374 | -1.0867017 | 1.3610949  |
| C  | 0.7053038  | -0.9939985 | 1.3398313  |
| C  | 1.5223928  | -2.1348688 | 1.7934017  |
| O  | -0.7101442 | 1.0584446  | 0.4739061  |
| C  | 0.9310357  | 1.5353758  | -2.7143732 |
| C  | 1.7985379  | 1.5006747  | -3.8368380 |
| C  | 1.6046139  | 2.3843498  | -4.9078489 |
| C  | 0.5482648  | 3.3121502  | -4.8796436 |
| C  | -0.3155739 | 3.3537136  | -3.7703583 |
| C  | -0.1271098 | 2.4784202  | -2.6927061 |
| H  | 2.6264471  | 0.7741179  | -3.8549566 |
| H  | 2.2867829  | 2.3491936  | -5.7734986 |
| H  | 0.3997020  | 4.0069114  | -5.7228199 |
| H  | -1.1450905 | 4.0795798  | -3.7432425 |
| H  | -0.7977290 | 2.5028749  | -1.8197662 |
| C  | 1.1209643  | 0.5937250  | -1.6368683 |
| C  | 1.2891557  | -0.5235868 | -1.0649263 |
| H  | 1.3650205  | -1.6113508 | -1.0932481 |
| H  | -1.2044599 | -1.9612831 | 1.7807001  |
| C  | -5.6935604 | 0.4280399  | 0.7868146  |
| C  | -4.8732260 | 1.5569739  | 0.6043783  |
| C  | -3.4791073 | 1.4241220  | 0.6323170  |
| C  | -3.7145290 | -0.9672559 | 1.0353129  |
| C  | -5.1103379 | -0.8335910 | 0.9991676  |
| H  | -6.7910934 | 0.5322035  | 0.7635136  |
| H  | -5.3271954 | 2.5483246  | 0.4407592  |
| H  | -2.8247368 | 2.2988518  | 0.4958738  |
| H  | -3.2728656 | -1.9635792 | 1.1913143  |
| H  | -5.7485923 | -1.7217179 | 1.1370152  |
| C  | 3.0580331  | -4.3695410 | 2.6573743  |
| C  | 3.4298663  | -3.0650970 | 3.0284627  |
| C  | 2.6845134  | -1.9624397 | 2.5882318  |
| C  | 1.1570995  | -3.4620276 | 1.4377184  |
| C  | 1.9212272  | -4.5624642 | 1.8534064  |
| H  | 3.6573577  | -5.2335446 | 2.9890534  |
| H  | 4.3184064  | -2.9022364 | 3.6605160  |
| H  | 2.9930370  | -0.9489848 | 2.8854907  |
| H  | 0.2687670  | -3.6236172 | 0.8047863  |
| H  | 1.6251862  | -5.5798783 | 1.5477199  |

\$vibrational spectrum

| #  | mode | symmetry | wave number<br>cm**(-1) | IR intensity<br>km/mol | selection rules |       |
|----|------|----------|-------------------------|------------------------|-----------------|-------|
| #  |      |          |                         |                        | IR              | RAMAN |
| 1  |      |          | 0.00                    | 0.00000                | -               | -     |
| 2  |      |          | 0.00                    | 0.00000                | -               | -     |
| 3  |      |          | 0.00                    | 0.00000                | -               | -     |
| 4  |      |          | 0.00                    | 0.00000                | -               | -     |
| 5  |      |          | 0.00                    | 0.00000                | -               | -     |
| 6  |      |          | 0.00                    | 0.00000                | -               | -     |
| 7  |      | a        | 19.34                   | 0.18328                | YES             | YES   |
| 8  |      | a        | 29.78                   | 0.20821                | YES             | YES   |
| 9  |      | a        | 32.91                   | 0.04331                | YES             | YES   |
| 10 |      | a        | 34.27                   | 0.08747                | YES             | YES   |
| 11 |      | a        | 41.54                   | 0.19343                | YES             | YES   |
| 12 |      | a        | 48.66                   | 0.55510                | YES             | YES   |
| 13 |      | a        | 57.82                   | 0.19647                | YES             | YES   |
| 14 |      | a        | 63.27                   | 0.31881                | YES             | YES   |
| 15 |      | a        | 74.34                   | 0.11516                | YES             | YES   |
| 16 |      | a        | 92.61                   | 0.34213                | YES             | YES   |
| 17 |      | a        | 95.48                   | 0.14209                | YES             | YES   |
| 18 |      | a        | 98.31                   | 1.04767                | YES             | YES   |
| 19 |      | a        | 104.50                  | 0.24461                | YES             | YES   |
| 20 |      | a        | 116.99                  | 0.52529                | YES             | YES   |
| 21 |      | a        | 124.52                  | 0.20012                | YES             | YES   |
| 22 |      | a        | 145.07                  | 0.11716                | YES             | YES   |
| 23 |      | a        | 154.08                  | 0.65564                | YES             | YES   |
| 24 |      | a        | 175.28                  | 4.49094                | YES             | YES   |
| 25 |      | a        | 193.75                  | 0.92811                | YES             | YES   |
| 26 |      | a        | 215.30                  | 0.74143                | YES             | YES   |
| 27 |      | a        | 221.97                  | 0.42138                | YES             | YES   |
| 28 |      | a        | 232.00                  | 1.96209                | YES             | YES   |
| 29 |      | a        | 259.41                  | 0.65432                | YES             | YES   |
| 30 |      | a        | 265.94                  | 0.65064                | YES             | YES   |
| 31 |      | a        | 318.81                  | 19.77363               | YES             | YES   |
| 32 |      | a        | 364.90                  | 3.81450                | YES             | YES   |
| 33 |      | a        | 396.90                  | 1.90010                | YES             | YES   |
| 34 |      | a        | 399.97                  | 0.14845                | YES             | YES   |
| 35 |      | a        | 401.99                  | 0.35826                | YES             | YES   |
| 36 |      | a        | 405.08                  | 2.76880                | YES             | YES   |
| 37 |      | a        | 417.70                  | 8.06474                | YES             | YES   |
| 38 |      | a        | 441.71                  | 6.07106                | YES             | YES   |
| 39 |      | a        | 453.03                  | 1.48347                | YES             | YES   |
| 40 |      | a        | 468.08                  | 5.77371                | YES             | YES   |
| 41 |      | a        | 476.58                  | 1.52319                | YES             | YES   |
| 42 |      | a        | 485.08                  | 6.65317                | YES             | YES   |
| 43 |      | a        | 488.75                  | 9.69227                | YES             | YES   |
| 44 |      | a        | 503.43                  | 1.20446                | YES             | YES   |
| 45 |      | a        | 509.22                  | 27.45127               | YES             | YES   |
| 46 |      | a        | 521.79                  | 15.92382               | YES             | YES   |
| 47 |      | a        | 534.58                  | 10.70216               | YES             | YES   |
| 48 |      | a        | 539.24                  | 4.13881                | YES             | YES   |
| 49 |      | a        | 563.79                  | 5.43094                | YES             | YES   |
| 50 |      | a        | 575.98                  | 25.67458               | YES             | YES   |

**3aa**

SCF Energy (au) BP86/SV(P) -2427.897218753  
SCF Energy (au) PBE0/def2-TZVPP -2427.461062227  
SCF Energy (au) PBE0/def2-TZVPP -2427.4722378136 (Toluene Correction)  
Zero Point Energy (au) 0.2981519  
Chemical Potential (kJ mol<sup>-1</sup>) 630.17  
Dispersion Correction (au) PBE0/def2-TZVPP -0.06351537

xyz coordinates

43

|    |            |            |            |
|----|------------|------------|------------|
| Mn | 1.1810811  | 0.7159650  | 0.5661474  |
| C  | 1.6598767  | 0.9219215  | 2.3218986  |
| C  | 2.8124931  | 0.1034934  | 0.0887737  |
| C  | 1.6285850  | 2.3714621  | 0.1740137  |
| O  | 1.8910188  | 3.4873282  | -0.0653848 |
| O  | 3.8664842  | -0.2685205 | -0.2369390 |
| O  | 1.9970452  | 1.0639864  | 3.4301209  |
| C  | -1.3639759 | 0.0004371  | 1.3595888  |
| C  | -1.5344690 | 2.2323180  | 0.6746315  |
| C  | -2.8999818 | 2.2629891  | 0.9887676  |
| C  | -3.5043130 | 1.1126164  | 1.5220845  |
| C  | -2.7223835 | -0.0387250 | 1.7130407  |
| C  | -0.4323711 | -1.1556316 | 1.4903727  |
| C  | 0.2282191  | -1.6852839 | 0.3595376  |
| C  | 0.9522997  | -2.9703101 | 0.5092773  |
| O  | 1.0602009  | -3.4894198 | 1.8241345  |
| C  | 0.4521165  | -2.9346565 | 2.9014701  |
| C  | -0.3120505 | -1.8039179 | 2.7701581  |
| H  | -1.0105112 | 3.1111142  | 0.2663304  |
| H  | -3.4764221 | 3.1855249  | 0.8182644  |
| H  | -4.5749929 | 1.1091453  | 1.7824192  |
| H  | -3.1549511 | -0.9672730 | 2.1167805  |
| O  | 1.4408513  | -3.6214689 | -0.3846887 |
| C  | 0.7252502  | -3.6793587 | 4.1700191  |
| H  | -0.7993238 | -1.3709488 | 3.6556688  |
| N  | -0.7869478 | 1.1259126  | 0.8682712  |
| C  | 0.4306811  | 0.7439951  | -2.5882684 |
| C  | 1.4333479  | 1.6346543  | -3.0505655 |
| C  | 1.3607196  | 2.2088200  | -4.3280906 |
| C  | 0.2732415  | 1.9259245  | -5.1739001 |
| C  | -0.7390712 | 1.0556150  | -4.7303850 |
| C  | -0.6602454 | 0.4704662  | -3.4584866 |
| H  | 2.2928458  | 1.8603887  | -2.4004361 |
| H  | 2.1611960  | 2.8881582  | -4.6656384 |
| H  | 0.2122367  | 2.3866509  | -6.1738962 |
| H  | -1.6002679 | 0.8323011  | -5.3826107 |
| H  | -1.4631317 | -0.2007728 | -3.1113904 |
| C  | 0.5017330  | 0.1159829  | -1.2647706 |
| C  | 0.1302878  | -1.1756697 | -1.0245816 |
| H  | -0.0776536 | -1.9218985 | -1.8186780 |
| H  | 0.1921505  | -3.2179402 | 5.0253523  |
| H  | 1.8172426  | -3.6823528 | 4.3875594  |
| H  | 0.4118588  | -4.7430222 | 4.0740278  |

\$vibrational spectrum

| # | mode | symmetry | wave number | IR intensity | selection rules |
|---|------|----------|-------------|--------------|-----------------|
| # |      |          | cm** (-1)   | km/mol       | IR RAMAN        |
|   | 1    |          | 0.00        | 0.00000      | - -             |
|   | 2    |          | 0.00        | 0.00000      | - -             |
|   | 3    |          | 0.00        | 0.00000      | - -             |
|   | 4    |          | 0.00        | 0.00000      | - -             |
|   | 5    |          | 0.00        | 0.00000      | - -             |

|    |   |        |          |     |     |
|----|---|--------|----------|-----|-----|
| 6  |   | 0.00   | 0.00000  | -   | -   |
| 7  | a | 27.13  | 0.22894  | YES | YES |
| 8  | a | 31.31  | 1.15888  | YES | YES |
| 9  | a | 38.64  | 0.09170  | YES | YES |
| 10 | a | 47.06  | 3.23123  | YES | YES |
| 11 | a | 51.03  | 0.03444  | YES | YES |
| 12 | a | 65.80  | 0.31219  | YES | YES |
| 13 | a | 70.64  | 0.62300  | YES | YES |
| 14 | a | 83.70  | 0.71523  | YES | YES |
| 15 | a | 85.74  | 0.30667  | YES | YES |
| 16 | a | 98.66  | 0.91459  | YES | YES |
| 17 | a | 100.41 | 0.85868  | YES | YES |
| 18 | a | 105.58 | 0.32114  | YES | YES |
| 19 | a | 122.03 | 0.32392  | YES | YES |
| 20 | a | 142.13 | 0.21008  | YES | YES |
| 21 | a | 147.67 | 1.31379  | YES | YES |
| 22 | a | 154.77 | 0.60684  | YES | YES |
| 23 | a | 164.90 | 0.61796  | YES | YES |
| 24 | a | 168.59 | 1.02392  | YES | YES |
| 25 | a | 204.03 | 1.34226  | YES | YES |
| 26 | a | 234.09 | 0.82969  | YES | YES |
| 27 | a | 264.90 | 0.57805  | YES | YES |
| 28 | a | 271.62 | 0.42055  | YES | YES |
| 29 | a | 287.09 | 2.49634  | YES | YES |
| 30 | a | 306.14 | 0.94595  | YES | YES |
| 31 | a | 337.11 | 1.05520  | YES | YES |
| 32 | a | 370.70 | 2.97965  | YES | YES |
| 33 | a | 395.16 | 8.92298  | YES | YES |
| 34 | a | 408.27 | 0.68182  | YES | YES |
| 35 | a | 432.09 | 0.64404  | YES | YES |
| 36 | a | 450.92 | 2.19969  | YES | YES |
| 37 | a | 458.61 | 0.68661  | YES | YES |
| 38 | a | 471.99 | 2.82716  | YES | YES |
| 39 | a | 480.60 | 1.00547  | YES | YES |
| 40 | a | 486.92 | 0.72672  | YES | YES |
| 41 | a | 495.74 | 7.17728  | YES | YES |
| 42 | a | 498.30 | 3.06704  | YES | YES |
| 43 | a | 520.60 | 3.47485  | YES | YES |
| 44 | a | 534.57 | 2.34487  | YES | YES |
| 45 | a | 543.14 | 2.48022  | YES | YES |
| 46 | a | 552.57 | 3.12640  | YES | YES |
| 47 | a | 564.04 | 1.11003  | YES | YES |
| 48 | a | 599.29 | 2.19529  | YES | YES |
| 49 | a | 613.24 | 1.04141  | YES | YES |
| 50 | a | 616.73 | 25.69378 | YES | YES |

**3aa'**

SCF Energy (au) BP86/SV(P) -2427.892694005  
 SCF Energy (au) PBE0/def2-TZVPP -2427.457091685  
 SCF Energy (au) PBE0/def2-TZVPP -2427.4689841208 (Toluene Correction)  
 Zero Point Energy (au) 0.2981446  
 Chemical Potential (kJ mol<sup>-1</sup>) 631.41  
 Dispersion Correction (au) PBE0/def2-TZVPP -0.06308410

## xyz coordinates

43

|    |            |            |            |
|----|------------|------------|------------|
| Mn | 1.3171493  | 1.8585225  | 0.5296280  |
| C  | 1.6298756  | 2.1496790  | 2.3126624  |
| C  | 3.0307253  | 1.3974938  | 0.2029409  |
| C  | 1.6464497  | 3.5272692  | 0.0470398  |
| O  | 1.8291102  | 4.6279022  | -0.3021686 |
| O  | 4.1385152  | 1.1270452  | -0.0289385 |
| O  | 1.8701931  | 2.3678615  | 3.4338012  |
| C  | -1.1847137 | 0.8917145  | 1.0692971  |
| C  | -1.5637281 | 3.1280814  | 0.5011556  |
| C  | -2.9455932 | 2.9756846  | 0.6882717  |
| C  | -3.4474210 | 1.7276430  | 1.0919780  |
| C  | -2.5502800 | 0.6634518  | 1.2902467  |
| C  | -0.0901566 | -0.1110759 | 1.2427466  |
| C  | 0.7083217  | -0.4934816 | 0.1437899  |
| C  | 1.7304981  | -1.5486002 | 0.3443189  |
| O  | 1.8298837  | -2.0854507 | 1.6614893  |
| C  | 1.0341846  | -1.7118421 | 2.6908435  |
| C  | 0.0741113  | -0.7478401 | 2.5256006  |
| H  | -1.1168883 | 4.0879769  | 0.1958499  |
| H  | -3.6155793 | 3.8331442  | 0.5201520  |
| H  | -4.5283614 | 1.5817486  | 1.2486727  |
| H  | -2.8986445 | -0.3336100 | 1.6009322  |
| O  | 2.4712274  | -2.0071104 | -0.4899417 |
| C  | 1.3433680  | -2.4441814 | 3.9587961  |
| H  | -0.5466861 | -0.4406024 | 3.3791964  |
| N  | -0.7096453 | 2.1048080  | 0.6960981  |
| H  | 0.8184261  | 1.8829236  | -2.3052401 |
| C  | 0.8588862  | 1.3098571  | -1.3604264 |
| C  | 0.5171987  | -0.0004278 | -1.2695444 |
| C  | 0.0323389  | -0.9242508 | -2.3214178 |
| H  | 0.6553275  | -2.1414774 | 4.7733723  |
| H  | 2.3902219  | -2.2377382 | 4.2764703  |
| H  | 1.2642493  | -3.5430963 | 3.8012614  |
| C  | -0.9610834 | -2.6689967 | -4.3362568 |
| C  | -0.2837614 | -1.4860245 | -4.6880366 |
| C  | 0.2098940  | -0.6288371 | -3.6958179 |
| C  | -0.6469555 | -2.1199279 | -1.9851720 |
| C  | -1.1373039 | -2.9824307 | -2.9782057 |
| H  | -1.3423396 | -3.3459983 | -5.1185200 |
| H  | -0.1273649 | -1.2356769 | -5.7508757 |
| H  | 0.7615512  | 0.2801757  | -3.9854026 |
| H  | -0.8033312 | -2.3761770 | -0.9232676 |
| H  | -1.6618697 | -3.9081283 | -2.6873795 |

## \$vibrational spectrum

| # | mode | symmetry | wave number | IR intensity | selection rules |
|---|------|----------|-------------|--------------|-----------------|
| # |      |          | cm** (-1)   | km/mol       | IR RAMAN        |
|   | 1    |          | 0.00        | 0.00000      | - -             |
|   | 2    |          | 0.00        | 0.00000      | - -             |
|   | 3    |          | 0.00        | 0.00000      | - -             |
|   | 4    |          | 0.00        | 0.00000      | - -             |
|   | 5    |          | 0.00        | 0.00000      | - -             |

|    |   |        |          |     |     |
|----|---|--------|----------|-----|-----|
| 6  |   | 0.00   | 0.00000  | -   | -   |
| 7  | a | 29.19  | 0.39689  | YES | YES |
| 8  | a | 37.85  | 0.18530  | YES | YES |
| 9  | a | 42.04  | 0.53987  | YES | YES |
| 10 | a | 45.28  | 2.33284  | YES | YES |
| 11 | a | 55.60  | 0.07883  | YES | YES |
| 12 | a | 71.08  | 1.12178  | YES | YES |
| 13 | a | 72.97  | 0.64680  | YES | YES |
| 14 | a | 81.99  | 0.64645  | YES | YES |
| 15 | a | 89.08  | 0.10909  | YES | YES |
| 16 | a | 92.22  | 0.21892  | YES | YES |
| 17 | a | 97.74  | 1.15302  | YES | YES |
| 18 | a | 104.90 | 0.38369  | YES | YES |
| 19 | a | 125.99 | 0.51286  | YES | YES |
| 20 | a | 140.22 | 2.69414  | YES | YES |
| 21 | a | 149.69 | 0.95855  | YES | YES |
| 22 | a | 161.56 | 1.03869  | YES | YES |
| 23 | a | 166.50 | 1.04911  | YES | YES |
| 24 | a | 189.68 | 0.39795  | YES | YES |
| 25 | a | 206.72 | 0.93187  | YES | YES |
| 26 | a | 226.68 | 0.48747  | YES | YES |
| 27 | a | 253.12 | 0.35894  | YES | YES |
| 28 | a | 281.86 | 1.61657  | YES | YES |
| 29 | a | 285.37 | 0.53583  | YES | YES |
| 30 | a | 303.63 | 3.70548  | YES | YES |
| 31 | a | 340.15 | 0.60494  | YES | YES |
| 32 | a | 346.30 | 1.04459  | YES | YES |
| 33 | a | 403.46 | 0.16006  | YES | YES |
| 34 | a | 423.67 | 1.61991  | YES | YES |
| 35 | a | 429.09 | 3.27110  | YES | YES |
| 36 | a | 452.70 | 3.31077  | YES | YES |
| 37 | a | 466.50 | 1.35906  | YES | YES |
| 38 | a | 473.72 | 1.84264  | YES | YES |
| 39 | a | 484.93 | 2.26677  | YES | YES |
| 40 | a | 487.33 | 1.39886  | YES | YES |
| 41 | a | 502.24 | 2.90579  | YES | YES |
| 42 | a | 519.55 | 11.89092 | YES | YES |
| 43 | a | 524.12 | 11.54128 | YES | YES |
| 44 | a | 535.06 | 2.93645  | YES | YES |
| 45 | a | 543.20 | 2.59277  | YES | YES |
| 46 | a | 556.86 | 3.38187  | YES | YES |
| 47 | a | 573.17 | 2.88697  | YES | YES |
| 48 | a | 600.66 | 33.06235 | YES | YES |
| 49 | a | 612.22 | 2.75040  | YES | YES |
| 50 | a | 619.54 | 32.55359 | YES | YES |

**3ba**

SCF Energy (au) BP86/SV(P) -2277.545461326  
 SCF Energy (au) PBE0/def2-TZVPP -2277.104429156  
 SCF Energy (au) PBE0/def2-TZVPP -2277.1124730146 (Toluene Correction)  
 Zero Point Energy (au) 0.2916084  
 Chemical Potential (kJ mol<sup>-1</sup>) 622.44  
 Dispersion Correction (au) PBE0/def2-TZVPP -0.06485876

xyz coordinates

41

|    |            |            |            |
|----|------------|------------|------------|
| Mn | 1.2035844  | 0.6105743  | 0.8523064  |
| C  | 1.6744913  | 0.8965522  | 2.5994236  |
| C  | 2.8473894  | 0.0456107  | 0.3779394  |
| C  | 1.5909450  | 2.2597372  | 0.4049332  |
| O  | 1.8148923  | 3.3744824  | 0.1207876  |
| O  | 3.9082864  | -0.3109878 | 0.0515739  |
| O  | 2.0053768  | 1.0941946  | 3.7003449  |
| C  | -1.3227434 | -0.2381294 | 1.6401022  |
| C  | -1.5436521 | 2.0144170  | 1.0274230  |
| C  | -2.9081022 | 2.0114590  | 1.3451955  |
| C  | -3.4882403 | 0.8327062  | 1.8409466  |
| C  | -2.6826732 | -0.3079262 | 1.9888013  |
| C  | -0.3856671 | -1.3933261 | 1.7627290  |
| C  | 0.2684065  | -1.9506208 | 0.6110439  |
| C  | 1.0047266  | -3.1538226 | 0.7947706  |
| C  | 1.1268247  | -3.7633542 | 2.0454734  |
| C  | 0.5024462  | -3.1928078 | 3.1746501  |
| C  | -0.2550789 | -2.0287122 | 3.0254885  |
| H  | -1.0387463 | 2.9154439  | 0.6443993  |
| H  | -3.5013098 | 2.9283945  | 1.2048881  |
| H  | -4.5582313 | 0.7983263  | 2.1023647  |
| H  | -3.0974068 | -1.2591955 | 2.3566214  |
| H  | 1.4894977  | -3.6036451 | -0.0875664 |
| H  | 1.7150206  | -4.6901783 | 2.1489020  |
| H  | 0.6024968  | -3.6636841 | 4.1659042  |
| H  | -0.7641460 | -1.5865805 | 3.8980022  |
| N  | -0.7722237 | 0.9178227  | 1.1841217  |
| C  | 0.4618578  | 0.5683655  | -2.2841753 |
| C  | 1.4959925  | 1.4046476  | -2.7766900 |
| C  | 1.4177823  | 1.9803452  | -4.0533923 |
| C  | 0.2933206  | 1.7557737  | -4.8679978 |
| C  | -0.7509429 | 0.9425426  | -4.3928556 |
| C  | -0.6667157 | 0.3551167  | -3.1214676 |
| H  | 2.3837147  | 1.5872005  | -2.1510279 |
| H  | 2.2430676  | 2.6166848  | -4.4145145 |
| H  | 0.2281842  | 2.2194463  | -5.8664202 |
| H  | -1.6426649 | 0.7667664  | -5.0182869 |
| H  | -1.4952286 | -0.2693487 | -2.7481429 |
| C  | 0.5384954  | -0.0687245 | -0.9602239 |
| C  | 0.1581614  | -1.3606470 | -0.7491599 |
| H  | -0.1011875 | -2.0549193 | -1.5772156 |

\$vibrational spectrum

| # | mode | symmetry | wave number | IR intensity | selection rules |       |
|---|------|----------|-------------|--------------|-----------------|-------|
| # |      |          | cm** (-1)   | km/mol       | IR              | RAMAN |
|   | 1    |          | 0.00        | 0.00000      | -               | -     |
|   | 2    |          | 0.00        | 0.00000      | -               | -     |
|   | 3    |          | 0.00        | 0.00000      | -               | -     |
|   | 4    |          | 0.00        | 0.00000      | -               | -     |
|   | 5    |          | 0.00        | 0.00000      | -               | -     |
|   | 6    |          | 0.00        | 0.00000      | -               | -     |
|   | 7    | a        | 30.29       | 0.17673      | YES             | YES   |

|    |   |        |          |     |     |
|----|---|--------|----------|-----|-----|
| 8  | a | 36.56  | 0.28054  | YES | YES |
| 9  | a | 45.25  | 0.15305  | YES | YES |
| 10 | a | 53.89  | 0.01637  | YES | YES |
| 11 | a | 59.66  | 0.18616  | YES | YES |
| 12 | a | 71.73  | 0.36929  | YES | YES |
| 13 | a | 75.91  | 0.28811  | YES | YES |
| 14 | a | 85.61  | 0.08148  | YES | YES |
| 15 | a | 95.08  | 1.34750  | YES | YES |
| 16 | a | 100.20 | 0.89084  | YES | YES |
| 17 | a | 106.07 | 0.11045  | YES | YES |
| 18 | a | 109.81 | 0.57321  | YES | YES |
| 19 | a | 145.93 | 0.39554  | YES | YES |
| 20 | a | 164.63 | 1.78407  | YES | YES |
| 21 | a | 176.37 | 0.65124  | YES | YES |
| 22 | a | 201.46 | 0.39912  | YES | YES |
| 23 | a | 225.54 | 0.91587  | YES | YES |
| 24 | a | 241.40 | 1.04718  | YES | YES |
| 25 | a | 290.50 | 0.84951  | YES | YES |
| 26 | a | 305.46 | 0.62450  | YES | YES |
| 27 | a | 340.85 | 1.99622  | YES | YES |
| 28 | a | 359.19 | 1.66423  | YES | YES |
| 29 | a | 407.29 | 0.27628  | YES | YES |
| 30 | a | 411.67 | 2.09351  | YES | YES |
| 31 | a | 430.32 | 2.45243  | YES | YES |
| 32 | a | 448.20 | 0.79627  | YES | YES |
| 33 | a | 458.90 | 0.39531  | YES | YES |
| 34 | a | 476.54 | 0.32414  | YES | YES |
| 35 | a | 479.07 | 5.08508  | YES | YES |
| 36 | a | 491.65 | 1.11876  | YES | YES |
| 37 | a | 505.52 | 7.79304  | YES | YES |
| 38 | a | 505.80 | 6.78980  | YES | YES |
| 39 | a | 534.99 | 0.55830  | YES | YES |
| 40 | a | 540.90 | 5.74478  | YES | YES |
| 41 | a | 548.34 | 4.66755  | YES | YES |
| 42 | a | 555.32 | 0.92651  | YES | YES |
| 43 | a | 564.16 | 0.93785  | YES | YES |
| 44 | a | 613.20 | 0.87636  | YES | YES |
| 45 | a | 621.73 | 35.32377 | YES | YES |
| 46 | a | 622.92 | 1.41328  | YES | YES |
| 47 | a | 630.49 | 26.57959 | YES | YES |
| 48 | a | 633.57 | 21.99769 | YES | YES |
| 49 | a | 644.97 | 6.16252  | YES | YES |
| 50 | a | 696.03 | 24.05804 | YES | YES |



**3ba'**

SCF Energy (au) BP86/SV(P) -2277.542842618  
 SCF Energy (au) PBE0/def2-TZVPP -2277.102650356  
 SCF Energy (au) PBE0/def2-TZVPP -2277.1108568307 (Toluene Correction)  
 Zero Point Energy (au) 0.2916320  
 Chemical Potential (kJ mol<sup>-1</sup>) 621.89  
 Dispersion Correction (au) PBE0/def2-TZVPP -0.06426298

xyz coordinates

41

|    |            |            |            |
|----|------------|------------|------------|
| Mn | 1.4885199  | 1.7045119  | 0.8181604  |
| C  | 1.8265077  | 2.1026966  | 2.5777115  |
| C  | 3.1454414  | 1.0652797  | 0.5205397  |
| C  | 1.9444044  | 3.2939881  | 0.2327303  |
| O  | 2.2063876  | 4.3558369  | -0.1870421 |
| O  | 4.2131739  | 0.6509773  | 0.3046883  |
| O  | 2.0828108  | 2.3739325  | 3.6828999  |
| C  | -1.0888999 | 0.8846646  | 1.3480670  |
| C  | -1.2672276 | 3.1519178  | 0.7822458  |
| C  | -2.6578844 | 3.1277864  | 0.9576351  |
| C  | -3.2731840 | 1.9291202  | 1.3523987  |
| C  | -2.4749497 | 0.7898686  | 1.5512143  |
| C  | -0.1314261 | -0.2465627 | 1.5563800  |
| C  | 0.5976287  | -0.8229594 | 0.4644390  |
| C  | 1.4042200  | -1.9613386 | 0.7375116  |
| C  | 1.5023706  | -2.5030140 | 2.0212514  |
| C  | 0.7823654  | -1.9282723 | 3.0902786  |
| C  | -0.0299553 | -0.8176980 | 2.8543520  |
| H  | -0.7337819 | 4.0677567  | 0.4807180  |
| H  | -3.2445334 | 4.0438220  | 0.7866494  |
| H  | -4.3641253 | 1.8787612  | 1.4995791  |
| H  | -2.9143293 | -0.1741581 | 1.8509878  |
| H  | 1.9574847  | -2.4179608 | -0.0991123 |
| H  | 2.1457900  | -3.3806853 | 2.1980356  |
| H  | 0.8584594  | -2.3507146 | 4.1052713  |
| H  | -0.6028304 | -0.3658125 | 3.6809242  |
| N  | -0.5072126 | 2.0562722  | 0.9820539  |
| H  | 1.0338613  | 1.5503658  | -1.9838215 |
| C  | 0.9936968  | 1.0196038  | -1.0131345 |
| C  | 0.5364100  | -0.2610022 | -0.9328100 |
| C  | 0.0626639  | -1.1237395 | -2.0460919 |
| C  | -0.8974941 | -2.7471965 | -4.1820293 |
| C  | -1.2411541 | -3.0468770 | -2.8531537 |
| C  | -0.7671295 | -2.2467719 | -1.8009977 |
| C  | 0.4052510  | -0.8428378 | -3.3933402 |
| C  | -0.0706512 | -1.6385431 | -4.4441504 |
| H  | -1.2654379 | -3.3762956 | -5.0093935 |
| H  | -1.8885083 | -3.9120274 | -2.6308809 |
| H  | -1.0556802 | -2.4909255 | -0.7649647 |
| H  | 1.0720201  | 0.0063175  | -3.6141987 |
| H  | 0.2169276  | -1.3980867 | -5.4816012 |

\$vibrational spectrum

| # | mode | symmetry | wave number<br>cm** (-1) | IR intensity<br>km/mol | selection rules |       |
|---|------|----------|--------------------------|------------------------|-----------------|-------|
| # |      |          |                          |                        | IR              | RAMAN |
| 1 |      |          | 0.00                     | 0.00000                | -               | -     |
| 2 |      |          | 0.00                     | 0.00000                | -               | -     |
| 3 |      |          | 0.00                     | 0.00000                | -               | -     |
| 4 |      |          | 0.00                     | 0.00000                | -               | -     |
| 5 |      |          | 0.00                     | 0.00000                | -               | -     |
| 6 |      |          | 0.00                     | 0.00000                | -               | -     |
| 7 |      | a        | 27.98                    | 0.21003                | YES             | YES   |

|    |   |        |          |     |     |
|----|---|--------|----------|-----|-----|
| 8  | a | 35.88  | 0.03719  | YES | YES |
| 9  | a | 42.40  | 0.53053  | YES | YES |
| 10 | a | 53.71  | 0.17874  | YES | YES |
| 11 | a | 55.09  | 0.13841  | YES | YES |
| 12 | a | 75.80  | 0.23442  | YES | YES |
| 13 | a | 77.98  | 0.89256  | YES | YES |
| 14 | a | 86.90  | 0.33696  | YES | YES |
| 15 | a | 91.37  | 0.61055  | YES | YES |
| 16 | a | 95.14  | 0.10495  | YES | YES |
| 17 | a | 100.47 | 0.86115  | YES | YES |
| 18 | a | 108.09 | 0.34828  | YES | YES |
| 19 | a | 143.97 | 1.32281  | YES | YES |
| 20 | a | 172.24 | 0.81078  | YES | YES |
| 21 | a | 181.93 | 0.53638  | YES | YES |
| 22 | a | 212.56 | 0.77347  | YES | YES |
| 23 | a | 220.47 | 0.60037  | YES | YES |
| 24 | a | 260.51 | 0.31917  | YES | YES |
| 25 | a | 268.38 | 0.73732  | YES | YES |
| 26 | a | 316.09 | 0.36434  | YES | YES |
| 27 | a | 330.62 | 2.16754  | YES | YES |
| 28 | a | 355.25 | 0.15889  | YES | YES |
| 29 | a | 404.05 | 0.10322  | YES | YES |
| 30 | a | 415.22 | 2.55529  | YES | YES |
| 31 | a | 433.11 | 3.82045  | YES | YES |
| 32 | a | 454.83 | 1.38103  | YES | YES |
| 33 | a | 460.18 | 0.75567  | YES | YES |
| 34 | a | 471.42 | 3.55094  | YES | YES |
| 35 | a | 475.30 | 0.66048  | YES | YES |
| 36 | a | 491.02 | 1.76918  | YES | YES |
| 37 | a | 515.76 | 7.99125  | YES | YES |
| 38 | a | 517.19 | 10.00528 | YES | YES |
| 39 | a | 530.15 | 2.93397  | YES | YES |
| 40 | a | 543.68 | 6.69378  | YES | YES |
| 41 | a | 551.17 | 0.59449  | YES | YES |
| 42 | a | 572.72 | 7.04324  | YES | YES |
| 43 | a | 608.23 | 17.58280 | YES | YES |
| 44 | a | 612.63 | 17.55498 | YES | YES |
| 45 | a | 618.95 | 10.36268 | YES | YES |
| 46 | a | 624.31 | 3.62383  | YES | YES |
| 47 | a | 627.60 | 41.99112 | YES | YES |
| 48 | a | 636.32 | 10.37859 | YES | YES |
| 49 | a | 654.78 | 7.29210  | YES | YES |
| 50 | a | 693.78 | 26.60027 | YES | YES |

**3bb**

SCF Energy (au) BP86/SV(P) -2505.270959872  
 SCF Energy (au) PBE0/def2-TZVPP -2504.828741005  
 SCF Energy (au) PBE0/def2-TZVPP -2504.8384434576 (Toluene Correction)  
 Zero Point Energy (au) 0.3336560  
 Chemical Potential (kJ mol<sup>-1</sup>) 711.91  
 Dispersion Correction (au) PBE0/def2-TZVPP -0.06961440

## xyz coordinates

47

|    |            |            |            |
|----|------------|------------|------------|
| Mn | 1.6477972  | 1.0275833  | 2.0605900  |
| C  | 1.8976650  | 1.2694763  | 3.8608441  |
| C  | 3.3020158  | 0.3626725  | 1.8050471  |
| C  | 2.1780726  | 2.6512926  | 1.6683046  |
| O  | 2.4926516  | 3.7462634  | 1.3914971  |
| O  | 4.3695223  | -0.0656815 | 1.6159589  |
| O  | 2.0955334  | 1.4417486  | 4.9969535  |
| C  | -0.9715380 | 0.2473441  | 2.4287731  |
| C  | -1.0499351 | 2.5466755  | 1.9737597  |
| C  | -2.4450362 | 2.5677129  | 2.1013274  |
| C  | -3.1157768 | 1.3761657  | 2.4180761  |
| C  | -2.3670369 | 0.1994742  | 2.5838918  |
| C  | -0.0896805 | -0.9507204 | 2.5898833  |
| C  | 0.6469780  | -1.4952711 | 1.4829103  |
| C  | 1.2885120  | -2.7487765 | 1.6746996  |
| C  | 1.2464645  | -3.4207830 | 2.8987807  |
| C  | 0.5497269  | -2.8619597 | 3.9908379  |
| C  | -0.1201860 | -1.6472937 | 3.8279927  |
| H  | -0.4745746 | 3.4555027  | 1.7362322  |
| H  | -2.9910714 | 3.5119022  | 1.9514598  |
| H  | -4.2122378 | 1.3596749  | 2.5266123  |
| H  | -2.8516628 | -0.7613711 | 2.8163959  |
| H  | 1.8354101  | -3.1864927 | 0.8232017  |
| H  | 1.7644995  | -4.3876886 | 3.0112949  |
| H  | 0.5233452  | -3.3822485 | 4.9618903  |
| H  | -0.6904628 | -1.2151454 | 4.6669278  |
| N  | -0.3372492 | 1.4146770  | 2.1450053  |
| C  | 1.4343270  | 1.2627304  | -1.0908466 |
| C  | 1.2152329  | 0.4607538  | 0.1506046  |
| C  | 0.7394831  | -0.8075673 | 0.1684062  |
| H  | 0.5149719  | -1.3942259 | -0.7454592 |
| H  | 2.5194542  | 1.4570064  | -1.2394867 |
| O  | 1.0014743  | 0.5985720  | -2.3075364 |
| H  | 0.9106454  | 2.2410176  | -1.0240664 |
| C  | -0.2351374 | 0.9166963  | -2.7772483 |
| O  | -0.9697675 | 1.7454896  | -2.2628037 |
| C  | -0.5837036 | 0.1342317  | -4.0072151 |
| C  | -1.3420827 | -1.2767439 | -6.3226452 |
| C  | -2.2212665 | -0.3382637 | -5.7518477 |
| C  | -1.8439204 | 0.3645661  | -4.5991023 |
| C  | 0.2965975  | -0.8071567 | -4.5836955 |
| C  | -0.0844649 | -1.5091943 | -5.7374509 |
| H  | -1.6386221 | -1.8296577 | -7.2298127 |
| H  | -3.2068873 | -0.1543811 | -6.2108652 |
| H  | -2.5123797 | 1.1056769  | -4.1330868 |
| H  | 1.2790814  | -0.9804965 | -4.1195620 |
| H  | 0.6052185  | -2.2437876 | -6.1854283 |

## \$vibrational spectrum

| # | mode | symmetry | wave number | IR intensity | selection rules |       |
|---|------|----------|-------------|--------------|-----------------|-------|
| # |      |          | cm**(-1)    | km/mol       | IR              | RAMAN |
|   | 1    |          | 0.00        | 0.00000      | -               | -     |
|   | 2    |          | 0.00        | 0.00000      | -               | -     |

|    |   |        |          |     |     |
|----|---|--------|----------|-----|-----|
| 3  |   | 0.00   | 0.00000  | -   | -   |
| 4  |   | 0.00   | 0.00000  | -   | -   |
| 5  |   | 0.00   | 0.00000  | -   | -   |
| 6  |   | 0.00   | 0.00000  | -   | -   |
| 7  | a | 10.78  | 1.10029  | YES | YES |
| 8  | a | 21.30  | 0.05131  | YES | YES |
| 9  | a | 25.19  | 0.81352  | YES | YES |
| 10 | a | 39.40  | 0.01817  | YES | YES |
| 11 | a | 42.14  | 0.18979  | YES | YES |
| 12 | a | 55.45  | 0.68925  | YES | YES |
| 13 | a | 57.90  | 0.38211  | YES | YES |
| 14 | a | 64.94  | 0.45207  | YES | YES |
| 15 | a | 74.83  | 0.18833  | YES | YES |
| 16 | a | 83.62  | 0.12810  | YES | YES |
| 17 | a | 86.40  | 0.08338  | YES | YES |
| 18 | a | 93.65  | 1.00408  | YES | YES |
| 19 | a | 95.93  | 0.76442  | YES | YES |
| 20 | a | 107.74 | 0.05519  | YES | YES |
| 21 | a | 117.15 | 0.46782  | YES | YES |
| 22 | a | 146.24 | 0.38746  | YES | YES |
| 23 | a | 155.71 | 0.99850  | YES | YES |
| 24 | a | 175.99 | 1.34711  | YES | YES |
| 25 | a | 190.00 | 1.81081  | YES | YES |
| 26 | a | 214.51 | 0.56787  | YES | YES |
| 27 | a | 237.60 | 1.83998  | YES | YES |
| 28 | a | 276.57 | 2.56669  | YES | YES |
| 29 | a | 290.70 | 0.88472  | YES | YES |
| 30 | a | 311.95 | 3.93747  | YES | YES |
| 31 | a | 331.38 | 17.34403 | YES | YES |
| 32 | a | 354.47 | 0.52693  | YES | YES |
| 33 | a | 365.80 | 4.48850  | YES | YES |
| 34 | a | 374.44 | 1.17807  | YES | YES |
| 35 | a | 404.85 | 0.01467  | YES | YES |
| 36 | a | 434.65 | 1.57511  | YES | YES |
| 37 | a | 441.25 | 0.43459  | YES | YES |
| 38 | a | 446.29 | 0.05822  | YES | YES |
| 39 | a | 455.43 | 0.59858  | YES | YES |
| 40 | a | 466.19 | 2.35891  | YES | YES |
| 41 | a | 475.71 | 2.30286  | YES | YES |
| 42 | a | 477.44 | 2.93109  | YES | YES |
| 43 | a | 489.91 | 1.94362  | YES | YES |
| 44 | a | 495.82 | 6.22667  | YES | YES |
| 45 | a | 511.62 | 5.83307  | YES | YES |
| 46 | a | 522.82 | 10.20532 | YES | YES |
| 47 | a | 538.10 | 1.68865  | YES | YES |
| 48 | a | 549.48 | 1.99689  | YES | YES |
| 49 | a | 576.38 | 3.85253  | YES | YES |
| 50 | a | 610.28 | 0.55554  | YES | YES |

**3bb'**

SCF Energy (au) BP86/SV(P) -2505.262474030  
 SCF Energy (au) PBE0/def2-TZVPP -2504.821881763  
 SCF Energy (au) PBE0/def2-TZVPP -2504.8324982709 (Toluene Correction)  
 Zero Point Energy (au) 0.3332973  
 Chemical Potential (kJ mol<sup>-1</sup>) 707.95  
 Dispersion Correction (au) PBE0/def2-TZVPP -0.06822560

xyz coordinates

47

|    |            |            |            |
|----|------------|------------|------------|
| Mn | 1.4239376  | 1.6744286  | 1.8220771  |
| C  | 1.8865455  | 2.2627008  | 3.4965058  |
| C  | 3.1056942  | 1.2035792  | 1.3873430  |
| C  | 1.6306999  | 3.2445483  | 1.0746210  |
| O  | 1.7262686  | 4.2893934  | 0.5526978  |
| O  | 4.1875927  | 0.8961212  | 1.0815572  |
| O  | 2.2210702  | 2.6565818  | 4.5424955  |
| C  | -0.9950372 | 0.6248463  | 2.6735470  |
| C  | -1.4576079 | 2.8078057  | 1.9592185  |
| C  | -2.8176036 | 2.6651682  | 2.2663124  |
| C  | -3.2690759 | 1.4505949  | 2.8065614  |
| C  | -2.3417691 | 0.4156411  | 3.0134971  |
| C  | 0.0764247  | -0.3995511 | 2.8792772  |
| C  | 0.7681943  | -0.9957410 | 1.7734712  |
| C  | 1.6808274  | -2.0469290 | 2.0566569  |
| C  | 1.9203980  | -2.4827095 | 3.3635035  |
| C  | 1.2444886  | -1.8825392 | 4.4449250  |
| C  | 0.3280167  | -0.8567160 | 4.1995850  |
| H  | -1.0510607 | 3.7420424  | 1.5401705  |
| H  | -3.5079445 | 3.5031200  | 2.0827257  |
| H  | -4.3320018 | 1.3072214  | 3.0598091  |
| H  | -2.6511245 | -0.5576994 | 3.4248795  |
| H  | 2.2192233  | -2.5183200 | 1.2184258  |
| H  | 2.6446682  | -3.2935919 | 3.5462002  |
| H  | 1.4342444  | -2.2179514 | 5.4773143  |
| H  | -0.2138813 | -0.3881755 | 5.0377423  |
| N  | -0.5713820 | 1.8119713  | 2.1663599  |
| H  | 0.7444662  | 1.1648687  | -0.9101610 |
| C  | 0.8359730  | 0.7575780  | 0.1133129  |
| C  | 0.5410352  | -0.5397815 | 0.3604814  |
| C  | 0.0598516  | -1.5885711 | -0.6198576 |
| H  | 0.7383530  | -2.4730668 | -0.6561824 |
| O  | -0.0366306 | -1.0211831 | -1.9346468 |
| H  | -0.9394416 | -1.9890683 | -0.3240467 |
| C  | -0.3792417 | -1.8897228 | -2.9238423 |
| C  | -0.4612079 | -1.2276167 | -4.2638339 |
| O  | -0.5948285 | -3.0752282 | -2.7243464 |
| C  | -0.6481598 | -0.0957918 | -6.8346892 |
| C  | -0.2881988 | 0.7066557  | -5.7371038 |
| C  | -0.1944030 | 0.1455912  | -4.4542450 |
| C  | -0.8217122 | -2.0287012 | -5.3688646 |
| C  | -0.9151381 | -1.4646325 | -6.6486519 |
| H  | -0.7204377 | 0.3484577  | -7.8416054 |
| H  | -0.0772928 | 1.7790471  | -5.8830349 |
| H  | 0.0882734  | 0.7675542  | -3.5916822 |
| H  | -1.0240530 | -3.0975207 | -5.1960703 |
| H  | -1.1970123 | -2.0947084 | -7.5084098 |

\$vibrational spectrum

| # | mode | symmetry | wave number | IR intensity | selection rules |
|---|------|----------|-------------|--------------|-----------------|
| # |      |          | cm** (-1)   | km/mol       | IR RAMAN        |
| 1 |      |          | 0.00        | 0.00000      | - -             |

|    |   |        |         |     |     |
|----|---|--------|---------|-----|-----|
| 2  |   | 0.00   | 0.00000 | -   | -   |
| 3  |   | 0.00   | 0.00000 | -   | -   |
| 4  |   | 0.00   | 0.00000 | -   | -   |
| 5  |   | 0.00   | 0.00000 | -   | -   |
| 6  |   | 0.00   | 0.00000 | -   | -   |
| 7  | a | 4.99   | 0.87779 | YES | YES |
| 8  | a | 14.98  | 0.49000 | YES | YES |
| 9  | a | 27.14  | 0.57272 | YES | YES |
| 10 | a | 41.47  | 0.03971 | YES | YES |
| 11 | a | 43.34  | 0.10929 | YES | YES |
| 12 | a | 50.05  | 0.78132 | YES | YES |
| 13 | a | 62.65  | 1.08905 | YES | YES |
| 14 | a | 73.73  | 0.24892 | YES | YES |
| 15 | a | 76.33  | 0.74414 | YES | YES |
| 16 | a | 80.36  | 0.19552 | YES | YES |
| 17 | a | 93.09  | 0.68049 | YES | YES |
| 18 | a | 93.15  | 0.12074 | YES | YES |
| 19 | a | 97.84  | 0.99353 | YES | YES |
| 20 | a | 107.09 | 0.42463 | YES | YES |
| 21 | a | 113.49 | 0.31746 | YES | YES |
| 22 | a | 138.60 | 0.77426 | YES | YES |
| 23 | a | 163.63 | 2.56034 | YES | YES |
| 24 | a | 165.67 | 1.61550 | YES | YES |
| 25 | a | 186.51 | 1.09764 | YES | YES |
| 26 | a | 199.15 | 1.39561 | YES | YES |
| 27 | a | 209.75 | 1.17396 | YES | YES |
| 28 | a | 255.17 | 3.35363 | YES | YES |
| 29 | a | 265.72 | 1.06408 | YES | YES |
| 30 | a | 299.42 | 3.21550 | YES | YES |
| 31 | a | 320.48 | 2.42530 | YES | YES |
| 32 | a | 331.95 | 3.75774 | YES | YES |
| 33 | a | 364.98 | 1.97094 | YES | YES |
| 34 | a | 379.24 | 1.10255 | YES | YES |
| 35 | a | 403.35 | 0.00028 | YES | YES |
| 36 | a | 434.60 | 4.97223 | YES | YES |
| 37 | a | 445.03 | 0.12190 | YES | YES |
| 38 | a | 451.78 | 0.68727 | YES | YES |
| 39 | a | 458.23 | 2.59165 | YES | YES |
| 40 | a | 474.34 | 0.99981 | YES | YES |
| 41 | a | 479.67 | 3.72907 | YES | YES |
| 42 | a | 482.22 | 7.97386 | YES | YES |
| 43 | a | 491.27 | 4.35792 | YES | YES |
| 44 | a | 515.35 | 9.18263 | YES | YES |
| 45 | a | 525.91 | 1.57433 | YES | YES |
| 46 | a | 529.50 | 3.93818 | YES | YES |
| 47 | a | 538.23 | 2.59232 | YES | YES |
| 48 | a | 562.36 | 3.58769 | YES | YES |
| 49 | a | 564.16 | 4.23410 | YES | YES |
| 50 | a | 610.15 | 0.24927 | YES | YES |

**3bc**

|                                            |                                       |
|--------------------------------------------|---------------------------------------|
| SCF Energy (au) BP86/SV(P)                 | -2281.135995277                       |
| SCF Energy (au) PBE0/def2-TZVPP            | -2280.709892308                       |
| SCF Energy (au) PBE0/def2-TZVPP            | -2280.7163380043 (Toluene Correction) |
| Zero Point Energy (au)                     | 0.3591834                             |
| Chemical Potential (kJ mol <sup>-1</sup> ) | 796.63                                |
| Dispersion Correction (au) PBE0/def2-TZVPP | -0.07061984                           |

xyz coordinates

47

|    |            |            |            |
|----|------------|------------|------------|
| Mn | 0.9786078  | 0.4084770  | 1.2223343  |
| C  | 1.4551385  | 0.7317916  | 2.9633209  |
| C  | 2.6487590  | -0.0631594 | 0.7487877  |
| C  | 1.2731209  | 2.0653396  | 0.7424884  |
| O  | 1.4452458  | 3.1841802  | 0.4315049  |
| O  | 3.7297294  | -0.3705447 | 0.4367893  |
| O  | 1.7956414  | 0.9609250  | 4.0552737  |
| C  | -1.4787280 | -0.6152415 | 2.0577329  |
| C  | -1.8374708 | 1.6433332  | 1.5472334  |
| C  | -3.1878842 | 1.5579354  | 1.9092559  |
| C  | -3.6919294 | 0.3292394  | 2.3653486  |
| C  | -2.8228319 | -0.7705066 | 2.4414410  |
| C  | -0.4767104 | -1.7177011 | 2.1490224  |
| C  | 0.2007391  | -2.2195548 | 0.9882094  |
| C  | 1.0166975  | -3.3725104 | 1.1547545  |
| C  | 1.1880167  | -3.9861117 | 2.3980705  |
| C  | 0.5382259  | -3.4679615 | 3.5375738  |
| C  | -0.2931455 | -2.3530503 | 3.4052073  |
| H  | -1.3909560 | 2.5879543  | 1.1990451  |
| H  | -3.8287663 | 2.4500780  | 1.8344837  |
| H  | -4.7498712 | 0.2270415  | 2.6566231  |
| H  | -3.1740538 | -1.7555089 | 2.7856520  |
| H  | 1.5223039  | -3.7814818 | 0.2641371  |
| H  | 1.8355437  | -4.8741353 | 2.4873512  |
| H  | 0.6770980  | -3.9400769 | 4.5235565  |
| H  | -0.8203979 | -1.9511518 | 4.2863317  |
| N  | -1.0056886 | 0.5825233  | 1.6225377  |
| C  | 0.3155452  | 0.2669481  | -1.9794547 |
| C  | 0.3573697  | -0.3225684 | -0.5901665 |
| C  | 0.0442766  | -1.6255992 | -0.3677651 |
| H  | -0.2105193 | -2.3278742 | -1.1932185 |
| C  | 1.7013136  | 0.7314648  | -2.4901721 |
| H  | -0.0187280 | -0.5468414 | -2.6714409 |
| C  | -0.7056419 | 1.4391834  | -2.1074004 |
| H  | 2.0152261  | 1.6281379  | -1.9101778 |
| C  | 1.6581457  | 1.0609065  | -4.0037239 |
| H  | 2.4660993  | -0.0490734 | -2.2881233 |
| C  | -0.3841621 | 2.3961246  | -3.2829140 |
| H  | -0.7203774 | 2.0173101  | -1.1577774 |
| H  | -1.7261741 | 1.0089775  | -2.2249673 |
| C  | 0.2917179  | 1.6487285  | -4.4435602 |
| H  | 0.2940312  | 3.2084799  | -2.9339137 |
| H  | -1.3148005 | 2.8999546  | -3.6280212 |
| H  | 2.4749332  | 1.7797358  | -4.2395862 |
| H  | 1.8751732  | 0.1435980  | -4.5970909 |
| H  | 0.4245959  | 2.3216262  | -5.3197810 |
| H  | -0.3844579 | 0.8306588  | -4.7848120 |

\$vibrational spectrum

| #  | mode | symmetry | wave number<br>cm**(-1) | IR intensity<br>km/mol | selection rules |       |
|----|------|----------|-------------------------|------------------------|-----------------|-------|
| #  |      |          |                         |                        | IR              | RAMAN |
| 1  |      |          | 0.00                    | 0.00000                | -               | -     |
| 2  |      |          | 0.00                    | 0.00000                | -               | -     |
| 3  |      |          | 0.00                    | 0.00000                | -               | -     |
| 4  |      |          | 0.00                    | 0.00000                | -               | -     |
| 5  |      |          | 0.00                    | 0.00000                | -               | -     |
| 6  |      |          | 0.00                    | 0.00000                | -               | -     |
| 7  |      | a        | 35.36                   | 0.26877                | YES             | YES   |
| 8  |      | a        | 37.03                   | 0.11738                | YES             | YES   |
| 9  |      | a        | 48.25                   | 0.04837                | YES             | YES   |
| 10 |      | a        | 51.60                   | 0.02182                | YES             | YES   |
| 11 |      | a        | 60.04                   | 0.43157                | YES             | YES   |
| 12 |      | a        | 65.10                   | 0.52792                | YES             | YES   |
| 13 |      | a        | 76.48                   | 0.13860                | YES             | YES   |
| 14 |      | a        | 88.60                   | 0.05733                | YES             | YES   |
| 15 |      | a        | 96.20                   | 0.79255                | YES             | YES   |
| 16 |      | a        | 100.71                  | 0.79076                | YES             | YES   |
| 17 |      | a        | 107.42                  | 0.45034                | YES             | YES   |
| 18 |      | a        | 108.57                  | 0.28856                | YES             | YES   |
| 19 |      | a        | 123.15                  | 0.04763                | YES             | YES   |
| 20 |      | a        | 142.86                  | 0.45196                | YES             | YES   |
| 21 |      | a        | 161.33                  | 1.25089                | YES             | YES   |
| 22 |      | a        | 171.62                  | 0.05950                | YES             | YES   |
| 23 |      | a        | 187.52                  | 0.39619                | YES             | YES   |
| 24 |      | a        | 212.63                  | 1.39349                | YES             | YES   |
| 25 |      | a        | 223.89                  | 0.51838                | YES             | YES   |
| 26 |      | a        | 259.86                  | 0.08106                | YES             | YES   |
| 27 |      | a        | 290.14                  | 1.01879                | YES             | YES   |
| 28 |      | a        | 295.14                  | 1.52142                | YES             | YES   |
| 29 |      | a        | 333.21                  | 1.70194                | YES             | YES   |
| 30 |      | a        | 355.39                  | 1.34461                | YES             | YES   |
| 31 |      | a        | 403.43                  | 0.50782                | YES             | YES   |
| 32 |      | a        | 419.53                  | 7.20342                | YES             | YES   |
| 33 |      | a        | 443.13                  | 1.20729                | YES             | YES   |
| 34 |      | a        | 451.04                  | 0.97650                | YES             | YES   |
| 35 |      | a        | 462.27                  | 1.80215                | YES             | YES   |
| 36 |      | a        | 464.56                  | 0.30656                | YES             | YES   |
| 37 |      | a        | 473.55                  | 0.91469                | YES             | YES   |
| 38 |      | a        | 481.66                  | 5.21201                | YES             | YES   |
| 39 |      | a        | 493.70                  | 2.55763                | YES             | YES   |
| 40 |      | a        | 503.71                  | 8.88712                | YES             | YES   |
| 41 |      | a        | 510.53                  | 8.46111                | YES             | YES   |
| 42 |      | a        | 528.20                  | 0.73778                | YES             | YES   |
| 43 |      | a        | 537.71                  | 0.57584                | YES             | YES   |
| 44 |      | a        | 548.05                  | 1.17087                | YES             | YES   |
| 45 |      | a        | 550.95                  | 2.53395                | YES             | YES   |
| 46 |      | a        | 567.38                  | 2.39919                | YES             | YES   |
| 47 |      | a        | 621.92                  | 28.41054               | YES             | YES   |
| 48 |      | a        | 622.65                  | 2.27148                | YES             | YES   |
| 49 |      | a        | 629.06                  | 34.34545               | YES             | YES   |
| 50 |      | a        | 634.10                  | 7.22001                | YES             | YES   |



**3bc'**

|                                            |                                       |
|--------------------------------------------|---------------------------------------|
| SCF Energy (au) BP86/SV(P)                 | -2281.140662981                       |
| SCF Energy (au) PBE0/def2-TZVPP            | -2280.715719323                       |
| SCF Energy (au) PBE0/def2-TZVPP            | -2280.7223820342 (Toluene Correction) |
| Zero Point Energy (au)                     | 0.3590261                             |
| Chemical Potential (kJ mol <sup>-1</sup> ) | 795.17                                |
| Dispersion Correction (au) PBE0/def2-TZVPP | -0.06962776                           |

xyz coordinates

47

|    |            |            |            |
|----|------------|------------|------------|
| Mn | 1.7008294  | 1.9178340  | 1.2440537  |
| C  | 1.9464929  | 2.2382414  | 3.0331653  |
| C  | 3.3315730  | 1.1960531  | 1.0180863  |
| C  | 2.2868389  | 3.4888898  | 0.7343215  |
| O  | 2.6405981  | 4.5418127  | 0.3602348  |
| O  | 4.3846566  | 0.7258024  | 0.8452115  |
| O  | 2.1525111  | 2.4639907  | 4.1595807  |
| C  | -0.9782636 | 1.2554733  | 1.5666412  |
| C  | -0.9342414 | 3.5476428  | 1.0845970  |
| C  | -2.3307824 | 3.6335022  | 1.1661203  |
| C  | -3.0673510 | 2.4772899  | 1.4704893  |
| C  | -2.3784885 | 1.2697402  | 1.6733330  |
| C  | -0.1295595 | 0.0478783  | 1.8081275  |
| C  | 0.6845288  | -0.5178141 | 0.7703939  |
| C  | 1.4519761  | -1.6688415 | 1.1034235  |
| C  | 1.3975069  | -2.2547954 | 2.3717161  |
| C  | 0.5680687  | -1.7075987 | 3.3710144  |
| C  | -0.1827243 | -0.5644054 | 3.0883288  |
| H  | -0.3100682 | 4.4267213  | 0.8574934  |
| H  | -2.8276646 | 4.6011997  | 0.9947426  |
| H  | -4.1662721 | 2.5132506  | 1.5450442  |
| H  | -2.9131136 | 0.3353467  | 1.9044298  |
| H  | 2.1172542  | -2.0946194 | 0.3373892  |
| H  | 2.0127821  | -3.1433835 | 2.5897974  |
| H  | 0.5222532  | -2.1657562 | 4.3723103  |
| H  | -0.8209259 | -0.1154719 | 3.8673750  |
| N  | -0.2777518 | 2.3872866  | 1.2903563  |
| H  | 1.3996283  | 1.8612120  | -1.6028164 |
| C  | 1.2783893  | 1.3182463  | -0.6440395 |
| C  | 0.7292965  | 0.0806393  | -0.6157631 |
| C  | 0.1674180  | -0.6703298 | -1.8229329 |
| C  | 0.9487741  | -1.9443464 | -2.2328460 |
| H  | 0.2553998  | 0.0463469  | -2.6744401 |
| C  | -1.3354527 | -1.0109098 | -1.6610256 |
| H  | 2.0263430  | -1.6978684 | -2.3658397 |
| C  | 0.3755887  | -2.5712595 | -3.5174003 |
| H  | 0.8866761  | -2.6995264 | -1.4142843 |
| C  | -1.9210119 | -1.6584808 | -2.9299712 |
| H  | -1.9023449 | -0.0867089 | -1.4056220 |
| H  | -1.4595226 | -1.7099529 | -0.7988130 |
| C  | -1.1197359 | -2.8983627 | -3.3627757 |
| H  | -1.9112953 | -0.9089820 | -3.7575255 |
| H  | -2.9896957 | -1.9259817 | -2.7643687 |
| H  | 0.9474940  | -3.4898021 | -3.7824158 |
| H  | 0.5125164  | -1.8597757 | -4.3661075 |
| H  | -1.5283127 | -3.3092554 | -4.3136337 |
| H  | -1.2408158 | -3.7001716 | -2.5951562 |

\$vibrational spectrum

| #  | mode | symmetry | wave number<br>cm**(-1) | IR intensity<br>km/mol | selection rules |       |
|----|------|----------|-------------------------|------------------------|-----------------|-------|
| #  |      |          |                         |                        | IR              | RAMAN |
| 1  |      |          | 0.00                    | 0.00000                | -               | -     |
| 2  |      |          | 0.00                    | 0.00000                | -               | -     |
| 3  |      |          | 0.00                    | 0.00000                | -               | -     |
| 4  |      |          | 0.00                    | 0.00000                | -               | -     |
| 5  |      |          | 0.00                    | 0.00000                | -               | -     |
| 6  |      |          | 0.00                    | 0.00000                | -               | -     |
| 7  |      | a        | 23.50                   | 0.32533                | YES             | YES   |
| 8  |      | a        | 31.99                   | 0.01860                | YES             | YES   |
| 9  |      | a        | 44.13                   | 0.24008                | YES             | YES   |
| 10 |      | a        | 51.06                   | 0.22408                | YES             | YES   |
| 11 |      | a        | 51.84                   | 0.35126                | YES             | YES   |
| 12 |      | a        | 69.06                   | 0.38263                | YES             | YES   |
| 13 |      | a        | 77.41                   | 0.09042                | YES             | YES   |
| 14 |      | a        | 87.88                   | 0.23113                | YES             | YES   |
| 15 |      | a        | 93.53                   | 0.67250                | YES             | YES   |
| 16 |      | a        | 96.45                   | 0.52594                | YES             | YES   |
| 17 |      | a        | 100.05                  | 0.08474                | YES             | YES   |
| 18 |      | a        | 106.99                  | 0.49804                | YES             | YES   |
| 19 |      | a        | 131.13                  | 0.27875                | YES             | YES   |
| 20 |      | a        | 157.94                  | 0.90602                | YES             | YES   |
| 21 |      | a        | 169.99                  | 1.48451                | YES             | YES   |
| 22 |      | a        | 203.07                  | 0.56503                | YES             | YES   |
| 23 |      | a        | 210.99                  | 0.25113                | YES             | YES   |
| 24 |      | a        | 220.28                  | 0.40385                | YES             | YES   |
| 25 |      | a        | 238.63                  | 0.03352                | YES             | YES   |
| 26 |      | a        | 268.33                  | 0.02872                | YES             | YES   |
| 27 |      | a        | 306.85                  | 0.86862                | YES             | YES   |
| 28 |      | a        | 314.02                  | 0.39462                | YES             | YES   |
| 29 |      | a        | 337.59                  | 1.09218                | YES             | YES   |
| 30 |      | a        | 353.62                  | 1.49040                | YES             | YES   |
| 31 |      | a        | 389.14                  | 0.87982                | YES             | YES   |
| 32 |      | a        | 428.20                  | 1.24568                | YES             | YES   |
| 33 |      | a        | 436.17                  | 3.80539                | YES             | YES   |
| 34 |      | a        | 439.55                  | 1.18578                | YES             | YES   |
| 35 |      | a        | 458.00                  | 1.66801                | YES             | YES   |
| 36 |      | a        | 463.29                  | 0.79979                | YES             | YES   |
| 37 |      | a        | 471.05                  | 1.32839                | YES             | YES   |
| 38 |      | a        | 476.24                  | 1.22475                | YES             | YES   |
| 39 |      | a        | 491.21                  | 2.23124                | YES             | YES   |
| 40 |      | a        | 515.51                  | 7.94809                | YES             | YES   |
| 41 |      | a        | 518.27                  | 3.62172                | YES             | YES   |
| 42 |      | a        | 522.65                  | 6.67053                | YES             | YES   |
| 43 |      | a        | 537.87                  | 3.65551                | YES             | YES   |
| 44 |      | a        | 546.13                  | 2.31482                | YES             | YES   |
| 45 |      | a        | 582.34                  | 2.57348                | YES             | YES   |
| 46 |      | a        | 604.22                  | 21.23873               | YES             | YES   |
| 47 |      | a        | 620.00                  | 8.90392                | YES             | YES   |
| 48 |      | a        | 627.22                  | 38.83376               | YES             | YES   |
| 49 |      | a        | 629.79                  | 7.92577                | YES             | YES   |
| 50 |      | a        | 637.71                  | 8.14397                | YES             | YES   |

**3bd**

|                                            |                                       |
|--------------------------------------------|---------------------------------------|
| SCF Energy (au) BP86/SV(P)                 | -2411.413617596                       |
| SCF Energy (au) PBE0/def2-TZVPP            | -2410.960779076                       |
| SCF Energy (au) PBE0/def2-TZVPP            | -2410.9697888395 (Toluene Correction) |
| Zero Point Energy (au)                     | 0.3619092                             |
| Chemical Potential (kJ mol <sup>-1</sup> ) | 789.69                                |
| Dispersion Correction (au)PBE0/def2-TZVPP  | -0.07292669                           |

## xyz coordinates

49

|    |            |            |            |
|----|------------|------------|------------|
| Mn | 1.1580946  | 0.2533469  | 2.0022092  |
| C  | 1.6348367  | 0.5380953  | 3.7484200  |
| C  | 2.7925991  | -0.3277689 | 1.5176508  |
| C  | 1.5653154  | 1.8951322  | 1.5564534  |
| O  | 1.8040972  | 3.0097385  | 1.2778736  |
| O  | 3.8473452  | -0.6948563 | 1.1821893  |
| O  | 1.9709921  | 0.7309954  | 4.8490138  |
| C  | -1.4026967 | -0.5179689 | 2.8343411  |
| C  | -1.5531558 | 1.7099038  | 2.1187935  |
| C  | -2.9141328 | 1.7686986  | 2.4427297  |
| C  | -3.5306391 | 0.6351080  | 2.9973705  |
| C  | -2.7627536 | -0.5232472 | 3.1929938  |
| C  | -0.5156184 | -1.7030816 | 2.9964020  |
| C  | 0.1482835  | -2.2987802 | 1.8677420  |
| C  | 0.8337906  | -3.5265776 | 2.0928654  |
| C  | 0.9013429  | -4.1209366 | 3.3544102  |
| C  | 0.2704004  | -3.5108000 | 4.4591501  |
| C  | -0.4399921 | -2.3227292 | 4.2706203  |
| H  | -1.0218140 | 2.5749738  | 1.6915378  |
| H  | -3.4766530 | 2.6978981  | 2.2619131  |
| H  | -4.5994638 | 0.6490149  | 3.2655475  |
| H  | -3.2072983 | -1.4427180 | 3.6042513  |
| H  | 1.3250606  | -4.0080314 | 1.2309236  |
| H  | 1.4531173  | -5.0665573 | 3.4859650  |
| H  | 0.3288523  | -3.9680692 | 5.4600933  |
| H  | -0.9536017 | -1.8474087 | 5.1229669  |
| N  | -0.8152995 | 0.5974297  | 2.3241413  |
| C  | 0.4378693  | 0.0965152  | -1.1362323 |
| C  | 1.4061952  | 1.0155642  | -1.6139407 |
| C  | 1.3827041  | 1.5187134  | -2.9174912 |
| C  | 0.3575769  | 1.1454161  | -3.8349631 |
| C  | -0.6344641 | 0.2388594  | -3.3574599 |
| C  | -0.5845963 | -0.2648783 | -2.0551730 |
| H  | 2.2229875  | 1.3305442  | -0.9460467 |
| H  | 2.1765766  | 2.2157761  | -3.2215062 |
| N  | 0.3208918  | 1.6473731  | -5.1284990 |
| H  | -1.4644746 | -0.0724593 | -4.0085269 |
| H  | -1.3814464 | -0.9508668 | -1.7224392 |
| C  | 0.4823353  | -0.4694157 | 0.2148392  |
| C  | 0.0874268  | -1.7501554 | 0.4903919  |
| H  | -0.1313716 | -2.4849103 | -0.3141261 |
| C  | -0.7211384 | 1.2196232  | -6.0429968 |
| C  | 1.3460939  | 2.5724649  | -5.5760493 |
| H  | 1.3697334  | 3.5021422  | -4.9580529 |
| H  | 1.1409724  | 2.8697347  | -6.6241407 |
| H  | 2.3674314  | 2.1205057  | -5.5435120 |
| H  | -0.5728768 | 1.7113929  | -7.0250688 |
| H  | -1.7409551 | 1.4924086  | -5.6775268 |
| H  | -0.7084804 | 0.1148478  | -6.2100478 |

\$vibrational spectrum

| #  | mode | symmetry | wave number<br>cm**(-1) | IR intensity<br>km/mol | selection rules |       |
|----|------|----------|-------------------------|------------------------|-----------------|-------|
| #  |      |          |                         |                        | IR              | RAMAN |
| 1  |      |          | 0.00                    | 0.00000                | -               | -     |
| 2  |      |          | 0.00                    | 0.00000                | -               | -     |
| 3  |      |          | 0.00                    | 0.00000                | -               | -     |
| 4  |      |          | 0.00                    | 0.00000                | -               | -     |
| 5  |      |          | 0.00                    | 0.00000                | -               | -     |
| 6  |      |          | 0.00                    | 0.00000                | -               | -     |
| 7  |      | a        | 21.08                   | 0.31267                | YES             | YES   |
| 8  |      | a        | 25.20                   | 1.16210                | YES             | YES   |
| 9  |      | a        | 39.43                   | 0.37353                | YES             | YES   |
| 10 |      | a        | 43.29                   | 0.93927                | YES             | YES   |
| 11 |      | a        | 49.24                   | 0.06683                | YES             | YES   |
| 12 |      | a        | 55.98                   | 0.63821                | YES             | YES   |
| 13 |      | a        | 65.09                   | 0.47275                | YES             | YES   |
| 14 |      | a        | 74.16                   | 0.64624                | YES             | YES   |
| 15 |      | a        | 75.81                   | 0.02333                | YES             | YES   |
| 16 |      | a        | 85.58                   | 0.10151                | YES             | YES   |
| 17 |      | a        | 93.05                   | 2.03898                | YES             | YES   |
| 18 |      | a        | 98.03                   | 0.55357                | YES             | YES   |
| 19 |      | a        | 100.07                  | 1.20359                | YES             | YES   |
| 20 |      | a        | 107.45                  | 0.07850                | YES             | YES   |
| 21 |      | a        | 121.05                  | 0.15239                | YES             | YES   |
| 22 |      | a        | 134.11                  | 0.51650                | YES             | YES   |
| 23 |      | a        | 153.22                  | 1.04832                | YES             | YES   |
| 24 |      | a        | 174.25                  | 0.48049                | YES             | YES   |
| 25 |      | a        | 197.72                  | 1.30506                | YES             | YES   |
| 26 |      | a        | 213.05                  | 0.33096                | YES             | YES   |
| 27 |      | a        | 214.24                  | 1.50010                | YES             | YES   |
| 28 |      | a        | 222.78                  | 0.43599                | YES             | YES   |
| 29 |      | a        | 261.15                  | 3.97850                | YES             | YES   |
| 30 |      | a        | 287.96                  | 1.54180                | YES             | YES   |
| 31 |      | a        | 300.00                  | 6.92838                | YES             | YES   |
| 32 |      | a        | 309.55                  | 1.05348                | YES             | YES   |
| 33 |      | a        | 351.99                  | 0.36710                | YES             | YES   |
| 34 |      | a        | 365.35                  | 3.37415                | YES             | YES   |
| 35 |      | a        | 411.90                  | 2.31770                | YES             | YES   |
| 36 |      | a        | 419.13                  | 3.32007                | YES             | YES   |
| 37 |      | a        | 423.46                  | 0.65970                | YES             | YES   |
| 38 |      | a        | 443.47                  | 1.55412                | YES             | YES   |
| 39 |      | a        | 455.43                  | 1.10299                | YES             | YES   |
| 40 |      | a        | 462.10                  | 0.58427                | YES             | YES   |
| 41 |      | a        | 469.99                  | 3.00002                | YES             | YES   |
| 42 |      | a        | 477.73                  | 5.04355                | YES             | YES   |
| 43 |      | a        | 483.03                  | 11.93955               | YES             | YES   |
| 44 |      | a        | 492.17                  | 1.18165                | YES             | YES   |
| 45 |      | a        | 505.41                  | 6.49846                | YES             | YES   |
| 46 |      | a        | 511.22                  | 3.50146                | YES             | YES   |
| 47 |      | a        | 532.30                  | 1.08792                | YES             | YES   |
| 48 |      | a        | 539.35                  | 4.13962                | YES             | YES   |
| 49 |      | a        | 541.66                  | 10.15662               | YES             | YES   |
| 50 |      | a        | 553.79                  | 0.72502                | YES             | YES   |

**3bd'**

|                                            |                                      |
|--------------------------------------------|--------------------------------------|
| SCF Energy (au) BP86/SV(P)                 | -2411.410447430                      |
| SCF Energy (au) PBE0/def2-TZVPP            | -2410.9683234203                     |
| SCF Energy (au) PBE0/def2-TZVPP            | -2410.958998524 (Toluene Correction) |
| Zero Point Energy (au)                     | 0.3619800                            |
| Chemical Potential (kJ mol <sup>-1</sup> ) | 789.09                               |
| Dispersion Correction (au) PBE0/def2-TZVPP | -0.07249849                          |

## xyz coordinates

49

|    |            |            |            |
|----|------------|------------|------------|
| Mn | 1.7594811  | 2.3780870  | 1.7905522  |
| C  | 2.1164445  | 2.7676239  | 3.5463937  |
| C  | 3.4076023  | 1.7338603  | 1.4632533  |
| C  | 2.2143365  | 3.9673582  | 1.2063758  |
| O  | 2.4755736  | 5.0305307  | 0.7878539  |
| O  | 4.4702473  | 1.3172361  | 1.2254476  |
| O  | 2.3853366  | 3.0343150  | 4.6505127  |
| C  | -0.8169518 | 1.5653483  | 2.3349170  |
| C  | -0.9917541 | 3.8351141  | 1.7792212  |
| C  | -2.3812763 | 3.8152428  | 1.9639769  |
| C  | -2.9979374 | 2.6172537  | 2.3586792  |
| C  | -2.2019531 | 1.4746599  | 2.5473014  |
| C  | 0.1367893  | 0.4292305  | 2.5314332  |
| C  | 0.8530995  | -0.1481106 | 1.4311450  |
| C  | 1.6521145  | -1.2944059 | 1.6949435  |
| C  | 1.7573642  | -1.8404689 | 2.9760550  |
| C  | 1.0507163  | -1.2637499 | 4.0532881  |
| C  | 0.2446318  | -0.1468652 | 3.8269131  |
| H  | -0.4570121 | 4.7502102  | 1.4776112  |
| H  | -2.9658978 | 4.7340201  | 1.8005746  |
| H  | -4.0880015 | 2.5700200  | 2.5135215  |
| H  | -2.6421761 | 0.5107777  | 2.8463223  |
| H  | 2.1936939  | -1.7523399 | 0.8514653  |
| H  | 2.3962216  | -2.7231491 | 3.1449226  |
| H  | 1.1324764  | -1.6894560 | 5.0665279  |
| H  | -0.3183687 | 0.3068091  | 4.6593589  |
| N  | -0.2338650 | 2.7364166  | 1.9696384  |
| H  | 1.2873711  | 2.2305719  | -1.0112830 |
| C  | 1.2436783  | 1.6982825  | -0.0416089 |
| C  | 0.7855325  | 0.4171385  | 0.0359651  |
| C  | 0.3205685  | -0.4499935 | -1.0740953 |
| C  | -0.6403717 | -2.1028271 | -3.2470443 |
| C  | -0.9730280 | -2.3859338 | -1.8917463 |
| C  | -0.5033633 | -1.5792577 | -0.8481322 |
| C  | 0.6575204  | -0.1811621 | -2.4238388 |
| C  | 0.1967957  | -0.9714930 | -3.4795579 |
| N  | -1.1012140 | -2.8933772 | -4.2925653 |
| H  | -1.6118688 | -3.2452270 | -1.6415554 |
| H  | -0.8003567 | -1.8353762 | 0.1830288  |
| H  | 1.3209240  | 0.6686278  | -2.6539594 |
| H  | 0.5086177  | -0.7108120 | -4.5012067 |
| C  | -0.7156781 | -2.5868255 | -5.6574505 |
| C  | -1.9011040 | -4.0696289 | -4.0099143 |
| H  | -1.3570415 | -4.8108492 | -3.3737167 |
| H  | -2.1675748 | -4.5714991 | -4.9617157 |
| H  | -2.8533116 | -3.8128451 | -3.4853204 |
| H  | -1.0397056 | -1.5628749 | -5.9622423 |
| H  | -1.1969285 | -3.3097895 | -6.3461398 |
| H  | 0.3896025  | -2.6504176 | -5.8141060 |

\$vibrational spectrum

| #  | mode | symmetry | wave number<br>cm**(-1) | IR intensity<br>km/mol | selection rules |       |
|----|------|----------|-------------------------|------------------------|-----------------|-------|
| #  |      |          |                         |                        | IR              | RAMAN |
| 1  |      |          | 0.00                    | 0.00000                | -               | -     |
| 2  |      |          | 0.00                    | 0.00000                | -               | -     |
| 3  |      |          | 0.00                    | 0.00000                | -               | -     |
| 4  |      |          | 0.00                    | 0.00000                | -               | -     |
| 5  |      |          | 0.00                    | 0.00000                | -               | -     |
| 6  |      |          | 0.00                    | 0.00000                | -               | -     |
| 7  |      | a        | 18.99                   | 0.66596                | YES             | YES   |
| 8  |      | a        | 27.88                   | 0.03399                | YES             | YES   |
| 9  |      | a        | 33.40                   | 0.36254                | YES             | YES   |
| 10 |      | a        | 42.85                   | 0.76193                | YES             | YES   |
| 11 |      | a        | 51.37                   | 0.25743                | YES             | YES   |
| 12 |      | a        | 53.18                   | 0.34361                | YES             | YES   |
| 13 |      | a        | 67.75                   | 1.47722                | YES             | YES   |
| 14 |      | a        | 73.69                   | 0.26541                | YES             | YES   |
| 15 |      | a        | 78.21                   | 0.05442                | YES             | YES   |
| 16 |      | a        | 79.66                   | 0.15106                | YES             | YES   |
| 17 |      | a        | 85.98                   | 0.22070                | YES             | YES   |
| 18 |      | a        | 91.80                   | 0.36237                | YES             | YES   |
| 19 |      | a        | 96.10                   | 1.06830                | YES             | YES   |
| 20 |      | a        | 100.26                  | 0.00276                | YES             | YES   |
| 21 |      | a        | 125.52                  | 1.17836                | YES             | YES   |
| 22 |      | a        | 136.18                  | 0.61147                | YES             | YES   |
| 23 |      | a        | 165.06                  | 0.63800                | YES             | YES   |
| 24 |      | a        | 188.52                  | 0.75308                | YES             | YES   |
| 25 |      | a        | 194.01                  | 1.12099                | YES             | YES   |
| 26 |      | a        | 200.97                  | 0.76149                | YES             | YES   |
| 27 |      | a        | 215.44                  | 0.05230                | YES             | YES   |
| 28 |      | a        | 225.48                  | 0.35162                | YES             | YES   |
| 29 |      | a        | 262.85                  | 0.32014                | YES             | YES   |
| 30 |      | a        | 285.40                  | 0.22519                | YES             | YES   |
| 31 |      | a        | 304.78                  | 1.10759                | YES             | YES   |
| 32 |      | a        | 318.87                  | 3.40583                | YES             | YES   |
| 33 |      | a        | 351.60                  | 0.75539                | YES             | YES   |
| 34 |      | a        | 359.42                  | 1.44456                | YES             | YES   |
| 35 |      | a        | 386.42                  | 0.45695                | YES             | YES   |
| 36 |      | a        | 419.25                  | 0.06425                | YES             | YES   |
| 37 |      | a        | 430.54                  | 2.55204                | YES             | YES   |
| 38 |      | a        | 435.88                  | 3.72607                | YES             | YES   |
| 39 |      | a        | 457.39                  | 1.39231                | YES             | YES   |
| 40 |      | a        | 465.04                  | 0.70328                | YES             | YES   |
| 41 |      | a        | 474.90                  | 1.30233                | YES             | YES   |
| 42 |      | a        | 477.20                  | 5.66843                | YES             | YES   |
| 43 |      | a        | 489.75                  | 4.52679                | YES             | YES   |
| 44 |      | a        | 507.07                  | 4.70699                | YES             | YES   |
| 45 |      | a        | 515.39                  | 6.35917                | YES             | YES   |
| 46 |      | a        | 519.83                  | 12.09470               | YES             | YES   |
| 47 |      | a        | 528.54                  | 3.87924                | YES             | YES   |
| 48 |      | a        | 540.13                  | 3.23204                | YES             | YES   |
| 49 |      | a        | 545.49                  | 2.69293                | YES             | YES   |
| 50 |      | a        | 565.39                  | 3.44381                | YES             | YES   |

**3be**

```

SCF Energy (au) BP86/SV(P) -2391.988619360
SCF Energy (au) PBE0/def2-TZVPP -2391.5574436897
SCF Energy (au) PBE0/def2-TZVPP -2391.548466315 (Toluene Correction)
Zero Point Energy (au) 0.3230463
Chemical Potential (kJ mol-1) 696.07
Dispersion Correction (au) PBE0/def2-TZVPP -0.06844294

```

xyz coordinates

45

```

Mn 1.0783337 0.3015995 1.4730911
C 1.5331549 0.5569657 3.2296976
C 2.7235407 -0.2613077 1.0018111
C 1.4768076 1.9552219 1.0594871
O 1.7082128 3.0750269 0.7988311
O 3.7858959 -0.6148355 0.6762550
O 1.8555017 0.7340766 4.3367940
C -1.4676057 -0.5315029 2.2360618
C -1.6583114 1.7225253 1.6187454
C -3.0252121 1.7354861 1.9244400
C -3.6228405 0.5642922 2.4176952
C -2.8313094 -0.5847469 2.5738154
C -0.5484364 -1.6989853 2.3623694
C 0.1181285 -2.2516676 1.2147237
C 0.8344046 -3.4674634 1.3995329
C 0.9270770 -4.0918218 2.6452063
C 0.2919355 -3.5247154 3.7702885
C -0.4474334 -2.3491377 3.6201287
H -1.1404232 2.6174085 1.2388200
H -3.6069078 2.6586850 1.7769019
H -4.6953745 0.5422602 2.6698833
H -3.2598795 -1.5310727 2.9384950
H 1.3282009 -3.9147031 0.5208648
H 1.5012311 -5.0275059 2.7482383
H 0.3695262 -4.0067391 4.7581991
H -0.9650548 -1.9088440 4.4885654
N -0.8997333 0.6179357 1.7841440
C 0.3727864 0.2770489 -1.6717431
C 1.3747366 1.1671111 -2.1257371
C 1.3339791 1.7492282 -3.4028118
C 0.2552050 1.4697441 -4.2693719
C -0.7677767 0.5961581 -3.8328035
C -0.7039282 0.0129448 -2.5661651
H 2.2277463 1.3973128 -1.4688332
H 2.1476028 2.4240561 -3.7073650
O 0.1054240 1.9924912 -5.5212622
H -1.6110245 0.3972062 -4.5133675
H -1.5184473 -0.6533929 -2.2376011
C 0.4281146 -0.3617485 -0.3500053
C 0.0371062 -1.6531094 -0.1424265
H -0.2044882 -2.3468740 -0.9762725
C 1.0986463 2.8748195 -6.0115048
H 0.7745559 3.1690357 -7.0304530
H 2.0975340 2.3808154 -6.0755190
H 1.1887987 3.7907179 -5.3798433

```

\$vibrational spectrum

| # | mode | symmetry | wave number<br>cm <sup>**</sup> (-1) | IR intensity<br>km/mol | selection rules<br>IR RAMAN |
|---|------|----------|--------------------------------------|------------------------|-----------------------------|
| # |      |          |                                      |                        |                             |
|   | 1    |          | 0.00                                 | 0.00000                | - -                         |
|   | 2    |          | 0.00                                 | 0.00000                | - -                         |
|   | 3    |          | 0.00                                 | 0.00000                | - -                         |

|    |   |        |          |     |     |
|----|---|--------|----------|-----|-----|
| 4  |   | 0.00   | 0.00000  | -   | -   |
| 5  |   | 0.00   | 0.00000  | -   | -   |
| 6  |   | 0.00   | 0.00000  | -   | -   |
| 7  | a | 24.73  | 0.42575  | YES | YES |
| 8  | a | 32.77  | 0.77416  | YES | YES |
| 9  | a | 42.59  | 0.15089  | YES | YES |
| 10 | a | 46.02  | 0.87848  | YES | YES |
| 11 | a | 52.13  | 0.24975  | YES | YES |
| 12 | a | 63.43  | 0.74685  | YES | YES |
| 13 | a | 74.81  | 0.35220  | YES | YES |
| 14 | a | 85.09  | 0.23384  | YES | YES |
| 15 | a | 92.76  | 2.26815  | YES | YES |
| 16 | a | 96.37  | 0.91130  | YES | YES |
| 17 | a | 99.38  | 0.70388  | YES | YES |
| 18 | a | 107.24 | 0.04566  | YES | YES |
| 19 | a | 110.33 | 0.13395  | YES | YES |
| 20 | a | 134.31 | 0.77873  | YES | YES |
| 21 | a | 149.52 | 0.77319  | YES | YES |
| 22 | a | 156.88 | 0.95919  | YES | YES |
| 23 | a | 184.06 | 2.13859  | YES | YES |
| 24 | a | 207.19 | 1.35787  | YES | YES |
| 25 | a | 225.26 | 0.81501  | YES | YES |
| 26 | a | 245.18 | 1.33807  | YES | YES |
| 27 | a | 261.34 | 0.08205  | YES | YES |
| 28 | a | 288.42 | 1.41136  | YES | YES |
| 29 | a | 299.88 | 4.71848  | YES | YES |
| 30 | a | 309.29 | 1.51426  | YES | YES |
| 31 | a | 355.99 | 0.36497  | YES | YES |
| 32 | a | 374.05 | 3.39132  | YES | YES |
| 33 | a | 416.53 | 2.14670  | YES | YES |
| 34 | a | 420.58 | 1.90198  | YES | YES |
| 35 | a | 442.85 | 1.75952  | YES | YES |
| 36 | a | 449.83 | 0.82556  | YES | YES |
| 37 | a | 458.49 | 1.00003  | YES | YES |
| 38 | a | 460.39 | 0.68765  | YES | YES |
| 39 | a | 477.03 | 2.82516  | YES | YES |
| 40 | a | 481.12 | 4.21536  | YES | YES |
| 41 | a | 491.75 | 0.15798  | YES | YES |
| 42 | a | 505.02 | 7.51385  | YES | YES |
| 43 | a | 510.10 | 5.19666  | YES | YES |
| 44 | a | 531.44 | 9.00323  | YES | YES |
| 45 | a | 539.68 | 6.37763  | YES | YES |
| 46 | a | 543.52 | 12.21052 | YES | YES |
| 47 | a | 553.19 | 0.47352  | YES | YES |
| 48 | a | 562.70 | 0.53993  | YES | YES |
| 49 | a | 606.89 | 11.00156 | YES | YES |
| 50 | a | 622.36 | 39.86735 | YES | YES |



**3be'**

SCF Energy (au) BP86/SV(P) -2391.985428432  
 SCF Energy (au) PBE0/def2-TZVPP -2391.546398574  
 SCF Energy (au) PBE0/def2-TZVPP -2391.5556957408 (Toluene Correction)  
 Zero Point Energy (au) 0.3230217  
 Chemical Potential (kJ mol<sup>-1</sup>) 695.14  
 Dispersion Correction (au) PBE0/def2-TZVPP -0.06784260

## xyz coordinates

45

|    |            |            |            |
|----|------------|------------|------------|
| Mn | 1.8122988  | 1.9480148  | 1.4147212  |
| C  | 2.1633410  | 2.2412118  | 3.1914086  |
| C  | 3.4260367  | 1.2198082  | 1.0881766  |
| C  | 2.3708124  | 3.5311227  | 0.9087900  |
| O  | 2.7033871  | 4.5923569  | 0.5400796  |
| O  | 4.4661979  | 0.7486149  | 0.8543723  |
| O  | 2.4275983  | 2.4515952  | 4.3083436  |
| C  | -0.8078624 | 1.2543860  | 1.8906140  |
| C  | -0.8508899 | 3.5589190  | 1.4669078  |
| C  | -2.2403562 | 3.6070803  | 1.6471064  |
| C  | -2.9257347 | 2.4251631  | 1.9702234  |
| C  | -2.1967927 | 1.2302014  | 2.0941101  |
| C  | 0.0787136  | 0.0554271  | 2.0244011  |
| C  | 0.7642242  | -0.5020519 | 0.8946779  |
| C  | 1.4890464  | -1.7088776 | 1.0928999  |
| C  | 1.5535021  | -2.3326115 | 2.3409788  |
| C  | 0.8802061  | -1.7743965 | 3.4486059  |
| C  | 0.1461699  | -0.5981896 | 3.2855988  |
| H  | -0.2635877 | 4.4578431  | 1.2194019  |
| H  | -2.7712795 | 4.5655252  | 1.5367376  |
| H  | -4.0175570 | 2.4309466  | 2.1193480  |
| H  | -2.6923763 | 0.2773633  | 2.3364265  |
| H  | 2.0070467  | -2.1502731 | 0.2261206  |
| H  | 2.1351046  | -3.2617665 | 2.4597967  |
| H  | 0.9310593  | -2.2610244 | 4.4360588  |
| H  | -0.3910429 | -0.1582303 | 4.1420564  |
| N  | -0.1578763 | 2.4098254  | 1.5956229  |
| H  | 1.3664242  | 1.9902530  | -1.3918890 |
| C  | 1.2834493  | 1.4028131  | -0.4572734 |
| C  | 0.7459051  | 0.1509559  | -0.4625141 |
| C  | 0.2320746  | -0.6098678 | -1.6295954 |
| C  | -0.8102307 | -2.0339223 | -3.8802903 |
| C  | -1.1850094 | -2.3990410 | -2.5709966 |
| C  | -0.6648818 | -1.6912546 | -1.4726317 |
| C  | 0.5997018  | -0.2684207 | -2.9589371 |
| C  | 0.0913856  | -0.9579672 | -4.0595924 |
| O  | -1.2465295 | -2.6482198 | -5.0190950 |
| H  | -1.8836455 | -3.2294423 | -2.3891168 |
| H  | -0.9813916 | -1.9900963 | -0.4593405 |
| H  | 1.3172506  | 0.5508679  | -3.1272071 |
| H  | 0.3890617  | -0.6920816 | -5.0863897 |
| C  | -2.1423304 | -3.7371722 | -4.8997078 |
| H  | -3.0985747 | -3.4365554 | -4.4077426 |
| H  | -1.6928093 | -4.5843190 | -4.3276767 |
| H  | -2.3592397 | -4.0745133 | -5.9335893 |

## \$vibrational spectrum

| # | mode | symmetry | wave number           | IR intensity | selection rules |
|---|------|----------|-----------------------|--------------|-----------------|
| # |      |          | cm <sup>**</sup> (-1) | km/mol       | IR RAMAN        |
|   | 1    |          | 0.00                  | 0.00000      | - -             |
|   | 2    |          | 0.00                  | 0.00000      | - -             |
|   | 3    |          | 0.00                  | 0.00000      | - -             |

|    |   |        |          |     |     |
|----|---|--------|----------|-----|-----|
| 4  |   | 0.00   | 0.00000  | -   | -   |
| 5  |   | 0.00   | 0.00000  | -   | -   |
| 6  |   | 0.00   | 0.00000  | -   | -   |
| 7  | a | 23.52  | 0.30109  | YES | YES |
| 8  | a | 30.01  | 0.16593  | YES | YES |
| 9  | a | 36.90  | 0.27643  | YES | YES |
| 10 | a | 50.51  | 0.06423  | YES | YES |
| 11 | a | 52.27  | 0.21524  | YES | YES |
| 12 | a | 67.09  | 1.22178  | YES | YES |
| 13 | a | 74.68  | 0.28231  | YES | YES |
| 14 | a | 78.64  | 0.28640  | YES | YES |
| 15 | a | 86.87  | 0.22244  | YES | YES |
| 16 | a | 92.50  | 0.63221  | YES | YES |
| 17 | a | 95.52  | 1.22483  | YES | YES |
| 18 | a | 100.13 | 0.02259  | YES | YES |
| 19 | a | 110.64 | 1.46995  | YES | YES |
| 20 | a | 134.65 | 0.58483  | YES | YES |
| 21 | a | 154.92 | 1.77198  | YES | YES |
| 22 | a | 168.01 | 0.43068  | YES | YES |
| 23 | a | 191.21 | 2.88992  | YES | YES |
| 24 | a | 204.06 | 0.04844  | YES | YES |
| 25 | a | 218.20 | 1.83517  | YES | YES |
| 26 | a | 245.89 | 0.16399  | YES | YES |
| 27 | a | 264.59 | 0.28702  | YES | YES |
| 28 | a | 281.62 | 1.29168  | YES | YES |
| 29 | a | 306.04 | 1.87473  | YES | YES |
| 30 | a | 320.05 | 2.46467  | YES | YES |
| 31 | a | 349.10 | 0.07857  | YES | YES |
| 32 | a | 357.62 | 0.91673  | YES | YES |
| 33 | a | 411.52 | 3.23641  | YES | YES |
| 34 | a | 413.58 | 0.11381  | YES | YES |
| 35 | a | 433.61 | 2.99339  | YES | YES |
| 36 | a | 453.82 | 0.36253  | YES | YES |
| 37 | a | 458.11 | 0.55712  | YES | YES |
| 38 | a | 465.67 | 0.55181  | YES | YES |
| 39 | a | 475.22 | 1.37219  | YES | YES |
| 40 | a | 489.37 | 4.35182  | YES | YES |
| 41 | a | 505.21 | 4.77785  | YES | YES |
| 42 | a | 515.59 | 11.10122 | YES | YES |
| 43 | a | 519.17 | 12.44789 | YES | YES |
| 44 | a | 530.62 | 5.92420  | YES | YES |
| 45 | a | 540.35 | 11.68463 | YES | YES |
| 46 | a | 545.26 | 3.48926  | YES | YES |
| 47 | a | 563.04 | 5.39888  | YES | YES |
| 48 | a | 606.72 | 24.11151 | YES | YES |
| 49 | a | 615.07 | 18.59324 | YES | YES |
| 50 | a | 622.05 | 7.04463  | YES | YES |

**3bf**

SCF Energy (au) BP86/SV(P) -2376.715791997  
 SCF Energy (au) PBE0/def2-TZVPP -2376.297634233  
 SCF Energy (au) PBE0/def2-TZVPP -2376.3055857295 (Toluene Correction)  
 Zero Point Energy (au) 0.2836993  
 Chemical Potential (kJ mol<sup>-1</sup>) 598.37  
 Dispersion Correction (au)PBE0/def2-TZVPP -0.06503775

xyz coordinates

41

|    |            |            |            |
|----|------------|------------|------------|
| Mn | 1.2193489  | 0.6020264  | 0.8606017  |
| C  | 1.6842037  | 0.8796677  | 2.6111754  |
| C  | 2.8635536  | 0.0347297  | 0.3892382  |
| C  | 1.6136558  | 2.2512375  | 0.4220448  |
| O  | 1.8430488  | 3.3662344  | 0.1421678  |
| O  | 3.9243350  | -0.3226417 | 0.0636773  |
| O  | 2.0099078  | 1.0716719  | 3.7144017  |
| C  | -1.3157925 | -0.2381116 | 1.6367694  |
| C  | -1.5220768 | 2.0153745  | 1.0217826  |
| C  | -2.8892199 | 2.0182225  | 1.3273910  |
| C  | -3.4786214 | 0.8418555  | 1.8179138  |
| C  | -2.6790387 | -0.3019325 | 1.9735991  |
| C  | -0.3847977 | -1.3973172 | 1.7667139  |
| C  | 0.2782322  | -1.9556667 | 0.6205201  |
| C  | 1.0105745  | -3.1603577 | 0.8100076  |
| C  | 1.1196397  | -3.7711764 | 2.0612806  |
| C  | 0.4856663  | -3.2003028 | 3.1849117  |
| C  | -0.2675173 | -2.0340653 | 3.0299354  |
| H  | -1.0102054 | 2.9143696  | 0.6432601  |
| H  | -3.4772754 | 2.9376370  | 1.1816374  |
| H  | -4.5511404 | 0.8118623  | 2.0692392  |
| H  | -3.1011012 | -1.2513266 | 2.3378737  |
| H  | 1.5021338  | -3.6107959 | -0.0682391 |
| H  | 1.7046006  | -4.6994786 | 2.1693927  |
| H  | 0.5748327  | -3.6726192 | 4.1765020  |
| H  | -0.7836713 | -1.5916614 | 3.8981051  |
| N  | -0.7566698 | 0.9154196  | 1.1849338  |
| C  | 0.4638524  | 0.5641322  | -2.2739335 |
| C  | 1.4741388  | 1.4300413  | -2.7659224 |
| C  | 1.3859130  | 2.0136955  | -4.0373997 |
| C  | 0.2610546  | 1.7505013  | -4.8313512 |
| C  | -0.7687117 | 0.9135563  | -4.3806572 |
| C  | -0.6592671 | 0.3264455  | -3.1124551 |
| H  | 2.3588837  | 1.6352477  | -2.1437123 |
| H  | 2.1767868  | 2.6771795  | -4.4209382 |
| F  | 0.1600023  | 2.3228520  | -6.0494858 |
| H  | -1.6444173 | 0.7381501  | -5.0252582 |
| H  | -1.4724362 | -0.3201573 | -2.7445602 |
| C  | 0.5544993  | -0.0746596 | -0.9524162 |
| C  | 0.1756649  | -1.3671346 | -0.7406668 |
| H  | -0.0825691 | -2.0627050 | -1.5680801 |

\$vibrational spectrum

| # | mode | symmetry | wave number<br>cm** (-1) | IR intensity<br>km/mol | selection rules |       |
|---|------|----------|--------------------------|------------------------|-----------------|-------|
| # |      |          |                          |                        | IR              | RAMAN |
| 1 |      |          | 0.00                     | 0.00000                | -               | -     |
| 2 |      |          | 0.00                     | 0.00000                | -               | -     |
| 3 |      |          | 0.00                     | 0.00000                | -               | -     |
| 4 |      |          | 0.00                     | 0.00000                | -               | -     |
| 5 |      |          | 0.00                     | 0.00000                | -               | -     |
| 6 |      |          | 0.00                     | 0.00000                | -               | -     |
| 7 |      | a        | 26.77                    | 0.20929                | YES             | YES   |

|    |   |        |          |     |     |
|----|---|--------|----------|-----|-----|
| 8  | a | 35.17  | 0.34218  | YES | YES |
| 9  | a | 43.76  | 0.07449  | YES | YES |
| 10 | a | 51.77  | 0.04781  | YES | YES |
| 11 | a | 56.52  | 0.02224  | YES | YES |
| 12 | a | 65.03  | 0.45307  | YES | YES |
| 13 | a | 75.62  | 0.26948  | YES | YES |
| 14 | a | 85.39  | 0.07668  | YES | YES |
| 15 | a | 94.89  | 1.43426  | YES | YES |
| 16 | a | 99.61  | 0.91990  | YES | YES |
| 17 | a | 104.50 | 0.18700  | YES | YES |
| 18 | a | 107.39 | 0.10932  | YES | YES |
| 19 | a | 139.09 | 0.09849  | YES | YES |
| 20 | a | 144.26 | 0.18890  | YES | YES |
| 21 | a | 160.21 | 1.62454  | YES | YES |
| 22 | a | 191.69 | 1.00490  | YES | YES |
| 23 | a | 214.21 | 1.03482  | YES | YES |
| 24 | a | 232.05 | 0.45241  | YES | YES |
| 25 | a | 285.99 | 2.11397  | YES | YES |
| 26 | a | 294.17 | 1.63832  | YES | YES |
| 27 | a | 303.39 | 2.14950  | YES | YES |
| 28 | a | 353.23 | 0.16027  | YES | YES |
| 29 | a | 365.44 | 1.32245  | YES | YES |
| 30 | a | 401.71 | 4.96093  | YES | YES |
| 31 | a | 416.92 | 0.44825  | YES | YES |
| 32 | a | 425.01 | 1.63155  | YES | YES |
| 33 | a | 443.83 | 0.90585  | YES | YES |
| 34 | a | 457.88 | 0.43720  | YES | YES |
| 35 | a | 459.00 | 0.25517  | YES | YES |
| 36 | a | 476.86 | 0.88823  | YES | YES |
| 37 | a | 479.54 | 4.53331  | YES | YES |
| 38 | a | 488.56 | 0.74087  | YES | YES |
| 39 | a | 503.99 | 5.66997  | YES | YES |
| 40 | a | 505.86 | 8.85895  | YES | YES |
| 41 | a | 520.33 | 11.79803 | YES | YES |
| 42 | a | 537.67 | 2.67685  | YES | YES |
| 43 | a | 541.17 | 10.51813 | YES | YES |
| 44 | a | 552.49 | 0.41224  | YES | YES |
| 45 | a | 558.84 | 0.56721  | YES | YES |
| 46 | a | 604.48 | 10.51765 | YES | YES |
| 47 | a | 622.15 | 39.45123 | YES | YES |
| 48 | a | 622.69 | 5.24592  | YES | YES |
| 49 | a | 628.44 | 20.32636 | YES | YES |
| 50 | a | 633.02 | 19.60220 | YES | YES |

**3bf'**

SCF Energy (au) BP86/SV(P) -2376.712862759  
SCF Energy (au) PBE0/def2-TZVPP -2376.295538110  
SCF Energy (au) PBE0/def2-TZVPP -2376.3037174351 (Toluene Correction)  
Zero Point Energy (au) 0.2837056  
Chemical Potential (kJ mol<sup>-1</sup>) 597.71  
Dispersion Correction (au) PBE0/def2-TZVPP -0.06440518

xyz coordinates

41

|    |            |            |            |
|----|------------|------------|------------|
| Mn | 1.4841279  | 1.7117603  | 0.8161645  |
| C  | 1.8347473  | 2.1095485  | 2.5732290  |
| C  | 3.1379523  | 1.0696979  | 0.5072899  |
| C  | 1.9390421  | 3.3004134  | 0.2278432  |
| O  | 2.2002880  | 4.3615391  | -0.1939786 |
| O  | 4.2031005  | 0.6530320  | 0.2834789  |
| O  | 2.0980604  | 2.3800517  | 3.6768443  |
| C  | -1.0912426 | 0.8955884  | 1.3618890  |
| C  | -1.2679949 | 3.1650984  | 0.8042767  |
| C  | -2.6571279 | 3.1446433  | 0.9918775  |
| C  | -3.2723958 | 1.9467289  | 1.3888197  |
| C  | -2.4757778 | 0.8045197  | 1.5771501  |
| C  | -0.1360325 | -0.2393286 | 1.5618573  |
| C  | 0.5855734  | -0.8182385 | 0.4659734  |
| C  | 1.3878778  | -1.9607722 | 0.7345586  |
| C  | 1.4896605  | -2.5042610 | 2.0172579  |
| C  | 0.7777799  | -1.9268438 | 3.0901668  |
| C  | -0.0303131 | -0.8122031 | 2.8587612  |
| H  | -0.7343996 | 4.0804218  | 0.5014531  |
| H  | -3.2424425 | 4.0630071  | 0.8290436  |
| H  | -4.3620244 | 1.8993039  | 1.5462304  |
| H  | -2.9154253 | -0.1586595 | 1.8792875  |
| H  | 1.9362159  | -2.4188131 | -0.1045801 |
| H  | 2.1299847  | -3.3849637 | 2.1900484  |
| H  | 0.8566168  | -2.3503587 | 4.1044705  |
| H  | -0.5971524 | -0.3585124 | 3.6884911  |
| N  | -0.5095354 | 2.0666317  | 0.9942040  |
| H  | 1.0145027  | 1.5569886  | -1.9830248 |
| C  | 0.9763957  | 1.0270270  | -1.0116645 |
| C  | 0.5225045  | -0.2547710 | -0.9302930 |
| C  | 0.0619967  | -1.1225549 | -2.0449167 |
| C  | -0.8527700 | -2.7478115 | -4.1697179 |
| C  | -1.2287016 | -3.0580846 | -2.8570813 |
| C  | -0.7701515 | -2.2457407 | -1.8084125 |
| C  | 0.4233886  | -0.8492925 | -3.3891059 |
| C  | -0.0298422 | -1.6463722 | -4.4476822 |
| F  | -1.2820083 | -3.5260240 | -5.1857821 |
| H  | -1.8773332 | -3.9283335 | -2.6700729 |
| H  | -1.0765659 | -2.4870338 | -0.7772746 |
| H  | 1.0912536  | -0.0008119 | -3.6073525 |
| H  | 0.2581675  | -1.4362164 | -5.4897271 |

\$vibrational spectrum

| # | mode | symmetry | wave number<br>cm** (-1) | IR intensity<br>km/mol | selection rules<br>IR | RAMAN |
|---|------|----------|--------------------------|------------------------|-----------------------|-------|
| # |      |          |                          |                        |                       |       |
| 1 |      |          | 0.00                     | 0.00000                | -                     | -     |
| 2 |      |          | 0.00                     | 0.00000                | -                     | -     |
| 3 |      |          | 0.00                     | 0.00000                | -                     | -     |
| 4 |      |          | 0.00                     | 0.00000                | -                     | -     |
| 5 |      |          | 0.00                     | 0.00000                | -                     | -     |
| 6 |      |          | 0.00                     | 0.00000                | -                     | -     |
| 7 |      | a        | 24.62                    | 0.36777                | YES                   | YES   |

|    |   |        |          |     |     |
|----|---|--------|----------|-----|-----|
| 8  | a | 34.24  | 0.13052  | YES | YES |
| 9  | a | 40.74  | 0.50128  | YES | YES |
| 10 | a | 52.69  | 0.03101  | YES | YES |
| 11 | a | 53.24  | 0.17478  | YES | YES |
| 12 | a | 71.92  | 1.11648  | YES | YES |
| 13 | a | 76.77  | 0.25782  | YES | YES |
| 14 | a | 83.21  | 0.23343  | YES | YES |
| 15 | a | 89.53  | 0.46304  | YES | YES |
| 16 | a | 93.28  | 0.18580  | YES | YES |
| 17 | a | 97.80  | 0.77714  | YES | YES |
| 18 | a | 103.60 | 0.00812  | YES | YES |
| 19 | a | 137.41 | 1.20567  | YES | YES |
| 20 | a | 153.58 | 0.57525  | YES | YES |
| 21 | a | 171.04 | 1.05843  | YES | YES |
| 22 | a | 203.77 | 0.97908  | YES | YES |
| 23 | a | 207.67 | 0.08842  | YES | YES |
| 24 | a | 243.63 | 0.46889  | YES | YES |
| 25 | a | 260.86 | 0.45042  | YES | YES |
| 26 | a | 303.88 | 1.62775  | YES | YES |
| 27 | a | 320.42 | 1.57653  | YES | YES |
| 28 | a | 340.64 | 0.35798  | YES | YES |
| 29 | a | 357.53 | 0.88841  | YES | YES |
| 30 | a | 395.13 | 2.68512  | YES | YES |
| 31 | a | 412.39 | 0.02398  | YES | YES |
| 32 | a | 424.94 | 0.63912  | YES | YES |
| 33 | a | 435.67 | 3.16904  | YES | YES |
| 34 | a | 457.09 | 0.86556  | YES | YES |
| 35 | a | 462.47 | 0.17062  | YES | YES |
| 36 | a | 475.11 | 1.19513  | YES | YES |
| 37 | a | 487.90 | 3.87155  | YES | YES |
| 38 | a | 496.79 | 17.14149 | YES | YES |
| 39 | a | 503.35 | 5.61634  | YES | YES |
| 40 | a | 517.87 | 11.40446 | YES | YES |
| 41 | a | 525.85 | 8.38907  | YES | YES |
| 42 | a | 536.67 | 2.63981  | YES | YES |
| 43 | a | 544.98 | 3.90885  | YES | YES |
| 44 | a | 563.85 | 6.90296  | YES | YES |
| 45 | a | 605.97 | 20.59872 | YES | YES |
| 46 | a | 615.23 | 21.57449 | YES | YES |
| 47 | a | 622.45 | 6.64940  | YES | YES |
| 48 | a | 624.34 | 31.15951 | YES | YES |
| 49 | a | 631.27 | 3.33761  | YES | YES |
| 50 | a | 635.77 | 17.39122 | YES | YES |

**3bg**

SCF Energy (au) BP86/SV(P) -2614.359816251  
 SCF Energy (au) PBE0/def2-TZVPP -2613.984795259  
 SCF Energy (au) PBE0/def2-TZVPP -2613.9929371345 (Toluene Correction)  
 Zero Point Energy (au) 0.2962443  
 Chemical Potential (kJ mol<sup>-1</sup>) 619.21  
 Dispersion Correction (au) PBE0/def2-TZVPP -0.06852295

xyz coordinates

44

|    |            |            |            |
|----|------------|------------|------------|
| Mn | 1.1861921  | 0.4233087  | 1.3165635  |
| C  | 1.6496781  | 0.7318831  | 3.0615198  |
| C  | 2.8324442  | -0.1503251 | 0.8592402  |
| C  | 1.5764145  | 2.0672875  | 0.8494133  |
| O  | 1.8015756  | 3.1767450  | 0.5480063  |
| O  | 3.8942168  | -0.5116914 | 0.5419882  |
| O  | 1.9743651  | 0.9448360  | 4.1608879  |
| C  | -1.3359910 | -0.4259872 | 2.0901301  |
| C  | -1.5663266 | 1.8264098  | 1.4793153  |
| C  | -2.9334150 | 1.8137320  | 1.7861338  |
| C  | -3.5094618 | 0.6301670  | 2.2749196  |
| C  | -2.6977821 | -0.5057507 | 2.4280755  |
| C  | -0.3888597 | -1.5738836 | 2.2204790  |
| C  | 0.2601682  | -2.1423136 | 1.0719082  |
| C  | 1.0035837  | -3.3393906 | 1.2618963  |
| C  | 1.1376889  | -3.9335189 | 2.5188968  |
| C  | 0.5185693  | -3.3527583 | 3.6456958  |
| C  | -0.2463025 | -2.1944069 | 3.4895463  |
| H  | -1.0640941 | 2.7313999  | 1.1019798  |
| H  | -3.5317034 | 2.7268438  | 1.6427157  |
| H  | -4.5812509 | 0.5884699  | 2.5276280  |
| H  | -3.1091275 | -1.4598707 | 2.7922637  |
| H  | 1.4842035  | -3.7967404 | 0.3812146  |
| H  | 1.7309746  | -4.8562239 | 2.6289410  |
| H  | 0.6280887  | -3.8119997 | 4.6413336  |
| H  | -0.7523739 | -1.7459878 | 4.3605277  |
| N  | -0.7901591 | 0.7339893  | 1.6397458  |
| C  | 0.4502444  | 0.3771908  | -1.8134071 |
| C  | 1.5031279  | 1.1820141  | -2.3181999 |
| C  | 1.4211083  | 1.7775904  | -3.5819796 |
| C  | 0.2699348  | 1.6042905  | -4.3750452 |
| C  | -0.7943677 | 0.8213249  | -3.8886097 |
| C  | -0.7019962 | 0.2157855  | -2.6292994 |
| H  | 2.4086376  | 1.3296299  | -1.7098435 |
| H  | 2.2543302  | 2.3941246  | -3.9533462 |
| C  | 0.1970226  | 2.2168518  | -5.7520544 |
| H  | -1.7037872 | 0.6935105  | -4.4967259 |
| H  | -1.5460078 | -0.3813972 | -2.2477264 |
| C  | 0.5271147  | -0.2669150 | -0.4950082 |
| C  | 0.1438119  | -1.5578492 | -0.2905013 |
| H  | -0.1236005 | -2.2496742 | -1.1179296 |
| F  | 0.9269758  | 3.3565088  | -5.8407486 |
| F  | -1.0778491 | 2.5221585  | -6.1055511 |
| F  | 0.6739844  | 1.3706320  | -6.7049893 |

\$vibrational spectrum

| # | mode | symmetry | wave number | IR intensity | selection rules |
|---|------|----------|-------------|--------------|-----------------|
| # |      |          | cm**(-1)    | km/mol       | IR RAMAN        |
|   | 1    |          | 0.00        | 0.00000      | - -             |
|   | 2    |          | 0.00        | 0.00000      | - -             |
|   | 3    |          | 0.00        | 0.00000      | - -             |
|   | 4    |          | 0.00        | 0.00000      | - -             |

|    |   |        |         |     |     |
|----|---|--------|---------|-----|-----|
| 5  |   | 0.00   | 0.00000 | -   | -   |
| 6  |   | 0.00   | 0.00000 | -   | -   |
| 7  | a | 21.16  | 0.19647 | YES | YES |
| 8  | a | 30.62  | 0.37460 | YES | YES |
| 9  | a | 34.38  | 0.08761 | YES | YES |
| 10 | a | 43.31  | 0.02830 | YES | YES |
| 11 | a | 45.44  | 0.00144 | YES | YES |
| 12 | a | 52.76  | 0.09202 | YES | YES |
| 13 | a | 61.15  | 0.48361 | YES | YES |
| 14 | a | 76.48  | 0.23164 | YES | YES |
| 15 | a | 85.17  | 0.06903 | YES | YES |
| 16 | a | 89.14  | 0.08270 | YES | YES |
| 17 | a | 94.28  | 1.18713 | YES | YES |
| 18 | a | 97.77  | 0.86356 | YES | YES |
| 19 | a | 105.08 | 0.11509 | YES | YES |
| 20 | a | 115.00 | 0.60942 | YES | YES |
| 21 | a | 124.46 | 0.08990 | YES | YES |
| 22 | a | 142.91 | 1.09096 | YES | YES |
| 23 | a | 165.52 | 0.91736 | YES | YES |
| 24 | a | 193.41 | 1.03521 | YES | YES |
| 25 | a | 206.99 | 1.04327 | YES | YES |
| 26 | a | 209.37 | 0.23505 | YES | YES |
| 27 | a | 246.59 | 0.58105 | YES | YES |
| 28 | a | 289.94 | 0.90528 | YES | YES |
| 29 | a | 302.57 | 1.09223 | YES | YES |
| 30 | a | 311.33 | 4.35150 | YES | YES |
| 31 | a | 353.49 | 1.33456 | YES | YES |
| 32 | a | 365.35 | 0.63782 | YES | YES |
| 33 | a | 388.01 | 1.67649 | YES | YES |
| 34 | a | 403.34 | 2.38918 | YES | YES |
| 35 | a | 406.95 | 2.43588 | YES | YES |
| 36 | a | 423.41 | 3.80656 | YES | YES |
| 37 | a | 443.59 | 2.53152 | YES | YES |
| 38 | a | 455.39 | 0.11763 | YES | YES |
| 39 | a | 459.59 | 0.25725 | YES | YES |
| 40 | a | 476.40 | 0.49494 | YES | YES |
| 41 | a | 480.99 | 4.10822 | YES | YES |
| 42 | a | 492.52 | 2.78660 | YES | YES |
| 43 | a | 505.99 | 5.85205 | YES | YES |
| 44 | a | 506.58 | 9.33807 | YES | YES |
| 45 | a | 528.92 | 2.64916 | YES | YES |
| 46 | a | 535.96 | 1.06907 | YES | YES |
| 47 | a | 549.17 | 2.80493 | YES | YES |
| 48 | a | 552.38 | 1.11732 | YES | YES |
| 49 | a | 568.97 | 0.13806 | YES | YES |
| 50 | a | 576.26 | 6.76105 | YES | YES |



**3bg'**

SCF Energy (au) BP86/SV(P) -2614.357206437  
 SCF Energy (au) PBE0/def2-TZVPP -2613.982644347  
 SCF Energy (au) PBE0/def2-TZVPP -2613.9909778406 (Toluene Correction)  
 Zero Point Energy (au) 0.2962383  
 Chemical Potential (kJ mol<sup>-1</sup>) 618.34  
 Dispersion Correction (au) PBE0/def2-TZVPP -0.06781524

xyz coordinates

44

|    |            |            |            |
|----|------------|------------|------------|
| Mn | 1.6001682  | 1.9660958  | 1.2084954  |
| C  | 1.9402133  | 2.3601237  | 2.9702089  |
| C  | 3.2552590  | 1.3172544  | 0.9168275  |
| C  | 2.0678143  | 3.5539099  | 0.6260754  |
| O  | 2.3383040  | 4.6136584  | 0.2077755  |
| O  | 4.3208450  | 0.8957304  | 0.7063910  |
| O  | 2.1966241  | 2.6283642  | 4.0754364  |
| C  | -0.9835461 | 1.1633802  | 1.7461958  |
| C  | -1.1452378 | 3.4336904  | 1.1871035  |
| C  | -2.5350874 | 3.4209000  | 1.3699921  |
| C  | -3.1584688 | 2.2264742  | 1.7648863  |
| C  | -2.3692137 | 1.0798174  | 1.9566628  |
| C  | -0.0337177 | 0.0245597  | 1.9488109  |
| C  | 0.6938366  | -0.5506656 | 0.8554690  |
| C  | 1.5003815  | -1.6897805 | 1.1248842  |
| C  | 1.5970839  | -2.2362874 | 2.4068790  |
| C  | 0.8769778  | -1.6642491 | 3.4769506  |
| C  | 0.0669285  | -0.5510369 | 3.2447207  |
| H  | -0.6057135 | 4.3459505  | 0.8855869  |
| H  | -3.1147598 | 4.3424036  | 1.2049079  |
| H  | -4.2489407 | 2.1851419  | 1.9179131  |
| H  | -2.8155056 | 0.1192388  | 2.2572971  |
| H  | 2.0553274  | -2.1439724 | 0.2879564  |
| H  | 2.2393663  | -3.1152472 | 2.5808171  |
| H  | 0.9515830  | -2.0904000 | 4.4904534  |
| H  | -0.5043819 | -0.1005059 | 4.0730469  |
| N  | -0.3937996 | 2.3309129  | 1.3799587  |
| H  | 1.1424550  | 1.8252016  | -1.5900900 |
| C  | 1.1010036  | 1.2923378  | -0.6205604 |
| C  | 0.6327642  | 0.0146024  | -0.5412096 |
| C  | 0.1520765  | -0.8394015 | -1.6544086 |
| C  | -0.8006482 | -2.4659841 | -3.7918210 |
| C  | -1.1247657 | -2.7817152 | -2.4594137 |
| C  | -0.6540416 | -1.9806723 | -1.4108200 |
| C  | 0.4642913  | -0.5384421 | -3.0052720 |
| C  | -0.0045216 | -1.3329374 | -4.0560291 |
| C  | -1.2384704 | -3.3710109 | -4.9169275 |
| H  | -1.7555102 | -3.6578757 | -2.2413575 |
| H  | -0.9280730 | -2.2405682 | -0.3753446 |
| H  | 1.1037146  | 0.3290837  | -3.2325959 |
| H  | 0.2560351  | -1.0779295 | -5.0951339 |
| F  | -0.3354706 | -4.3639575 | -5.1412764 |
| F  | -1.3787107 | -2.6995453 | -6.0876251 |
| F  | -2.4244684 | -3.9766473 | -4.6518171 |

\$vibrational spectrum

| # | mode | symmetry | wave number<br>cm** (-1) | IR intensity<br>km/mol | selection rules<br>IR RAMAN |
|---|------|----------|--------------------------|------------------------|-----------------------------|
| # |      |          |                          |                        |                             |
|   | 1    |          | 0.00                     | 0.00000                | - -                         |
|   | 2    |          | 0.00                     | 0.00000                | - -                         |
|   | 3    |          | 0.00                     | 0.00000                | - -                         |
|   | 4    |          | 0.00                     | 0.00000                | - -                         |

|    |   |        |         |     |     |
|----|---|--------|---------|-----|-----|
| 5  |   | 0.00   | 0.00000 | -   | -   |
| 6  |   | 0.00   | 0.00000 | -   | -   |
| 7  | a | 19.68  | 0.52294 | YES | YES |
| 8  | a | 26.46  | 0.13913 | YES | YES |
| 9  | a | 32.03  | 0.26819 | YES | YES |
| 10 | a | 41.65  | 0.40771 | YES | YES |
| 11 | a | 48.83  | 0.05953 | YES | YES |
| 12 | a | 53.68  | 0.29348 | YES | YES |
| 13 | a | 63.35  | 1.14071 | YES | YES |
| 14 | a | 73.77  | 0.06558 | YES | YES |
| 15 | a | 77.85  | 0.22656 | YES | YES |
| 16 | a | 84.33  | 0.31054 | YES | YES |
| 17 | a | 91.53  | 0.39077 | YES | YES |
| 18 | a | 95.57  | 0.57094 | YES | YES |
| 19 | a | 99.41  | 0.23112 | YES | YES |
| 20 | a | 120.35 | 1.01401 | YES | YES |
| 21 | a | 132.15 | 0.20509 | YES | YES |
| 22 | a | 159.95 | 0.84835 | YES | YES |
| 23 | a | 171.94 | 1.33900 | YES | YES |
| 24 | a | 186.84 | 0.47245 | YES | YES |
| 25 | a | 195.29 | 0.80549 | YES | YES |
| 26 | a | 221.48 | 0.38611 | YES | YES |
| 27 | a | 263.02 | 1.98195 | YES | YES |
| 28 | a | 267.54 | 0.28038 | YES | YES |
| 29 | a | 301.13 | 0.31184 | YES | YES |
| 30 | a | 323.00 | 3.63535 | YES | YES |
| 31 | a | 348.55 | 0.80659 | YES | YES |
| 32 | a | 361.83 | 2.92247 | YES | YES |
| 33 | a | 382.91 | 0.74989 | YES | YES |
| 34 | a | 397.60 | 2.23162 | YES | YES |
| 35 | a | 404.48 | 1.12542 | YES | YES |
| 36 | a | 432.96 | 8.21703 | YES | YES |
| 37 | a | 436.02 | 5.05123 | YES | YES |
| 38 | a | 458.17 | 3.76486 | YES | YES |
| 39 | a | 461.98 | 3.13311 | YES | YES |
| 40 | a | 474.49 | 1.24921 | YES | YES |
| 41 | a | 482.14 | 4.98839 | YES | YES |
| 42 | a | 491.52 | 1.26753 | YES | YES |
| 43 | a | 515.90 | 6.81848 | YES | YES |
| 44 | a | 521.01 | 9.17935 | YES | YES |
| 45 | a | 531.91 | 0.61700 | YES | YES |
| 46 | a | 543.89 | 4.41968 | YES | YES |
| 47 | a | 555.20 | 2.97278 | YES | YES |
| 48 | a | 565.14 | 1.58730 | YES | YES |
| 49 | a | 577.77 | 1.37054 | YES | YES |
| 50 | a | 593.16 | 2.46991 | YES | YES |

**3bh**

|                                            |                                       |
|--------------------------------------------|---------------------------------------|
| SCF Energy (au) BP86/SV(P)                 | -2505.273702407                       |
| SCF Energy (au) PBE0/def2-TZVPP            | -2504.831435415                       |
| SCF Energy (au) PBE0/def2-TZVPP            | -2504.8417586438 (Toluene Correction) |
| Zero Point Energy (au)                     | 0.3330534                             |
| Chemical Potential (kJ mol <sup>-1</sup> ) | 713.51                                |
| Dispersion Correction (au) PBE0/def2-TZVPP | -0.07112017                           |

xyz coordinates

47

|    |            |            |            |
|----|------------|------------|------------|
| Mn | 1.1127105  | 0.1658704  | 1.8333390  |
| C  | 1.5835667  | 0.4652460  | 3.5777114  |
| C  | 2.7580751  | -0.4013803 | 1.3658922  |
| C  | 1.4987726  | 1.8125468  | 1.3726203  |
| O  | 1.7223402  | 2.9241475  | 1.0778646  |
| O  | 3.8197636  | -0.7593539 | 1.0442834  |
| O  | 1.9126438  | 0.6717683  | 4.6772089  |
| C  | -1.4083933 | -0.6864908 | 2.6225665  |
| C  | -1.6393087 | 1.5654795  | 2.0113434  |
| C  | -3.0045365 | 1.5549963  | 2.3260552  |
| C  | -3.5795623 | 0.3725487  | 2.8187640  |
| C  | -2.7685323 | -0.7641869 | 2.9680342  |
| C  | -0.4628153 | -1.8353476 | 2.7491352  |
| C  | 0.1903774  | -2.3969144 | 1.5994388  |
| C  | 0.9370427  | -3.5926930 | 1.7871187  |
| C  | 1.0689458  | -4.1922977 | 3.0417279  |
| C  | 0.4441777  | -3.6187550 | 4.1690795  |
| C  | -0.3227804 | -2.4613801 | 4.0156019  |
| H  | -1.1382390 | 2.4694458  | 1.6301879  |
| H  | -3.6023673 | 2.4687759  | 2.1851321  |
| H  | -4.6500949 | 0.3322759  | 3.0769977  |
| H  | -3.1792429 | -1.7176700 | 3.3346265  |
| H  | 1.4210940  | -4.0452573 | 0.9058355  |
| H  | 1.6643287  | -5.1139616 | 3.1493900  |
| H  | 0.5510143  | -4.0825979 | 5.1629201  |
| H  | -0.8324425 | -2.0179584 | 4.8870611  |
| N  | -0.8633106 | 0.4723700  | 2.1681784  |
| C  | 0.3546108  | 0.1156761  | -1.2967836 |
| C  | 1.3937879  | 0.9355107  | -1.8095598 |
| C  | 1.3014148  | 1.5180366  | -3.0781817 |
| C  | 0.1508371  | 1.3199446  | -3.8747206 |
| C  | -0.8979050 | 0.5181877  | -3.3735738 |
| C  | -0.7967238 | -0.0741491 | -2.1113860 |
| H  | 2.2977957  | 1.0998998  | -1.2026855 |
| H  | 2.1238572  | 2.1399783  | -3.4621786 |
| C  | -0.0148038 | 1.9274728  | -5.2272940 |
| H  | -1.7927646 | 0.3752723  | -3.9999790 |
| H  | -1.6273941 | -0.6863229 | -1.7237034 |
| C  | 0.4438958  | -0.5211862 | 0.0233078  |
| C  | 0.0692481  | -1.8140045 | 0.2365671  |
| H  | -0.1943918 | -2.5108049 | -0.5878937 |
| O  | 1.0685248  | 2.6674624  | -5.5973594 |
| O  | -0.9976746 | 1.7912167  | -5.9403573 |
| C  | 0.9803481  | 3.2813351  | -6.8872879 |
| H  | 1.9278126  | 3.8392272  | -7.0223537 |
| H  | 0.1117819  | 3.9733183  | -6.9386616 |
| H  | 0.8645159  | 2.5147030  | -7.6840296 |

\$vibrational spectrum

| #  | mode | symmetry | wave number<br>cm**(-1) | IR intensity<br>km/mol | selection rules |       |
|----|------|----------|-------------------------|------------------------|-----------------|-------|
| #  |      |          |                         |                        | IR              | RAMAN |
| 1  |      |          | 0.00                    | 0.00000                | -               | -     |
| 2  |      |          | 0.00                    | 0.00000                | -               | -     |
| 3  |      |          | 0.00                    | 0.00000                | -               | -     |
| 4  |      |          | 0.00                    | 0.00000                | -               | -     |
| 5  |      |          | 0.00                    | 0.00000                | -               | -     |
| 6  |      |          | 0.00                    | 0.00000                | -               | -     |
| 7  |      | a        | 21.47                   | 0.25461                | YES             | YES   |
| 8  |      | a        | 29.01                   | 0.98577                | YES             | YES   |
| 9  |      | a        | 36.31                   | 1.24804                | YES             | YES   |
| 10 |      | a        | 43.19                   | 0.04438                | YES             | YES   |
| 11 |      | a        | 49.37                   | 0.17824                | YES             | YES   |
| 12 |      | a        | 60.58                   | 0.47438                | YES             | YES   |
| 13 |      | a        | 72.51                   | 0.60654                | YES             | YES   |
| 14 |      | a        | 76.70                   | 0.17487                | YES             | YES   |
| 15 |      | a        | 83.77                   | 0.35492                | YES             | YES   |
| 16 |      | a        | 85.91                   | 0.04484                | YES             | YES   |
| 17 |      | a        | 94.45                   | 1.25210                | YES             | YES   |
| 18 |      | a        | 96.61                   | 0.86233                | YES             | YES   |
| 19 |      | a        | 104.33                  | 0.04465                | YES             | YES   |
| 20 |      | a        | 110.46                  | 0.11004                | YES             | YES   |
| 21 |      | a        | 116.69                  | 0.76729                | YES             | YES   |
| 22 |      | a        | 122.66                  | 0.49100                | YES             | YES   |
| 23 |      | a        | 145.17                  | 0.74573                | YES             | YES   |
| 24 |      | a        | 155.67                  | 0.42430                | YES             | YES   |
| 25 |      | a        | 165.40                  | 1.94312                | YES             | YES   |
| 26 |      | a        | 196.82                  | 0.30048                | YES             | YES   |
| 27 |      | a        | 202.74                  | 2.62503                | YES             | YES   |
| 28 |      | a        | 231.80                  | 0.93245                | YES             | YES   |
| 29 |      | a        | 265.95                  | 4.40239                | YES             | YES   |
| 30 |      | a        | 291.06                  | 0.35258                | YES             | YES   |
| 31 |      | a        | 300.26                  | 8.23611                | YES             | YES   |
| 32 |      | a        | 319.46                  | 10.79951               | YES             | YES   |
| 33 |      | a        | 335.23                  | 2.25638                | YES             | YES   |
| 34 |      | a        | 360.78                  | 1.49515                | YES             | YES   |
| 35 |      | a        | 397.04                  | 0.64580                | YES             | YES   |
| 36 |      | a        | 410.01                  | 0.38725                | YES             | YES   |
| 37 |      | a        | 415.09                  | 1.68924                | YES             | YES   |
| 38 |      | a        | 434.16                  | 1.71597                | YES             | YES   |
| 39 |      | a        | 448.98                  | 0.27168                | YES             | YES   |
| 40 |      | a        | 458.05                  | 0.85427                | YES             | YES   |
| 41 |      | a        | 471.42                  | 3.20674                | YES             | YES   |
| 42 |      | a        | 476.46                  | 0.29819                | YES             | YES   |
| 43 |      | a        | 483.71                  | 5.55441                | YES             | YES   |
| 44 |      | a        | 493.53                  | 4.04021                | YES             | YES   |
| 45 |      | a        | 507.03                  | 9.25964                | YES             | YES   |
| 46 |      | a        | 509.77                  | 7.06654                | YES             | YES   |
| 47 |      | a        | 536.07                  | 0.97439                | YES             | YES   |
| 48 |      | a        | 541.46                  | 5.73429                | YES             | YES   |
| 49 |      | a        | 550.95                  | 1.47145                | YES             | YES   |
| 50 |      | a        | 560.15                  | 1.29427                | YES             | YES   |
| 51 |      | a        | 581.11                  | 3.81664                | YES             | YES   |

**3bh'**

|                                            |                                       |
|--------------------------------------------|---------------------------------------|
| SCF Energy (au) BP86/SV(P)                 | -2505.271309102                       |
| SCF Energy (au) PBE0/def2-TZVPP            | -2504.829599821                       |
| SCF Energy (au) PBE0/def2-TZVPP            | -2504.8400771336 (Toluene Correction) |
| Zero Point Energy (au)                     | 0.3330903                             |
| Chemical Potential (kJ mol <sup>-1</sup> ) | 712.91                                |
| Dispersion Correction (au) PBE0/def2-TZVPP | -0.07050338                           |

## xyz coordinates

47

|    |            |            |            |
|----|------------|------------|------------|
| Mn | 1.6951515  | 2.2430586  | 1.7176277  |
| C  | 2.0101655  | 2.6557657  | 3.4800857  |
| C  | 3.3595998  | 1.6083577  | 1.4508410  |
| C  | 2.1535237  | 3.8297089  | 1.1245673  |
| O  | 2.4173128  | 4.8883301  | 0.6988351  |
| O  | 4.4319548  | 1.1965283  | 1.2556827  |
| O  | 2.2528970  | 2.9349053  | 4.5857533  |
| C  | -0.8911553 | 1.4255255  | 2.2317931  |
| C  | -1.0636848 | 3.6857983  | 1.6372204  |
| C  | -2.4562428 | 3.6626635  | 1.7969004  |
| C  | -3.0754853 | 2.4682106  | 2.1983456  |
| C  | -2.2793436 | 1.3318583  | 2.4201525  |
| C  | 0.0665331  | 0.2994706  | 2.4640724  |
| C  | 0.8181627  | -0.2785311 | 1.3889900  |
| C  | 1.6377436  | -1.4017069 | 1.6847080  |
| C  | 1.7222910  | -1.9311725 | 2.9746488  |
| C  | 0.9762750  | -1.3577444 | 4.0261294  |
| C  | 0.1542544  | -0.2591693 | 3.7681922  |
| H  | -0.5275454 | 4.5985734  | 1.3312333  |
| H  | -3.0414274 | 4.5761381  | 1.6082466  |
| H  | -4.1680748 | 2.4187907  | 2.3328839  |
| H  | -2.7219556 | 0.3712217  | 2.7259262  |
| H  | 2.2111109  | -1.8581712 | 0.8615820  |
| H  | 2.3743136  | -2.7985375 | 3.1693147  |
| H  | 1.0405027  | -1.7712958 | 5.0455614  |
| H  | -0.4361572 | 0.1931152  | 4.5820178  |
| N  | -0.3055626 | 2.5929144  | 1.8583711  |
| H  | 1.2733847  | 2.0659007  | -1.0847791 |
| C  | 1.2260194  | 1.5444683  | -0.1094272 |
| C  | 0.7639596  | 0.2647934  | -0.0173071 |
| C  | 0.2863037  | -0.6035700 | -1.1187124 |
| C  | -0.6827035 | -2.2508569 | -3.2398217 |
| C  | -0.9766216 | -2.5633958 | -1.8956706 |
| C  | -0.5001765 | -1.7566044 | -0.8571930 |
| C  | 0.5785651  | -0.3053822 | -2.4761989 |
| C  | 0.1032394  | -1.1077699 | -3.5164954 |
| C  | -1.2145995 | -3.1489235 | -4.3044051 |
| H  | -1.5907120 | -3.4538243 | -1.6870042 |
| H  | -0.7510834 | -2.0168623 | 0.1842040  |
| H  | 1.2080316  | 0.5669184  | -2.7138496 |
| H  | 0.3471571  | -0.8613470 | -4.5608105 |
| O  | -0.8560241 | -2.7367563 | -5.5540155 |
| O  | -1.8957086 | -4.1438773 | -4.1059219 |
| C  | -1.3314246 | -3.5532820 | -6.6293140 |
| H  | -2.4423585 | -3.5923027 | -6.6363219 |
| H  | -0.9454243 | -4.5917947 | -6.5390658 |
| H  | -0.9549812 | -3.0801377 | -7.5575728 |

\$vibrational spectrum

| #  | mode | symmetry | wave number<br>cm**(-1) | IR intensity<br>km/mol | selection rules |       |
|----|------|----------|-------------------------|------------------------|-----------------|-------|
|    |      |          |                         |                        | IR              | RAMAN |
| 1  |      |          | 0.00                    | 0.00000                | -               | -     |
| 2  |      |          | 0.00                    | 0.00000                | -               | -     |
| 3  |      |          | 0.00                    | 0.00000                | -               | -     |
| 4  |      |          | 0.00                    | 0.00000                | -               | -     |
| 5  |      |          | 0.00                    | 0.00000                | -               | -     |
| 6  |      |          | 0.00                    | 0.00000                | -               | -     |
| 7  |      | a        | 17.32                   | 0.40677                | YES             | YES   |
| 8  |      | a        | 30.33                   | 0.77351                | YES             | YES   |
| 9  |      | a        | 33.68                   | 1.59592                | YES             | YES   |
| 10 |      | a        | 45.15                   | 0.07589                | YES             | YES   |
| 11 |      | a        | 52.02                   | 0.21572                | YES             | YES   |
| 12 |      | a        | 61.41                   | 0.36558                | YES             | YES   |
| 13 |      | a        | 69.80                   | 2.06162                | YES             | YES   |
| 14 |      | a        | 73.43                   | 0.09241                | YES             | YES   |
| 15 |      | a        | 79.52                   | 0.14497                | YES             | YES   |
| 16 |      | a        | 84.06                   | 0.11968                | YES             | YES   |
| 17 |      | a        | 91.95                   | 0.36492                | YES             | YES   |
| 18 |      | a        | 95.46                   | 0.71358                | YES             | YES   |
| 19 |      | a        | 98.89                   | 0.16745                | YES             | YES   |
| 20 |      | a        | 112.27                  | 0.74477                | YES             | YES   |
| 21 |      | a        | 119.97                  | 0.79742                | YES             | YES   |
| 22 |      | a        | 124.94                  | 0.35669                | YES             | YES   |
| 23 |      | a        | 152.47                  | 0.60793                | YES             | YES   |
| 24 |      | a        | 161.11                  | 2.48913                | YES             | YES   |
| 25 |      | a        | 169.65                  | 0.53274                | YES             | YES   |
| 26 |      | a        | 192.71                  | 1.55445                | YES             | YES   |
| 27 |      | a        | 205.35                  | 0.68783                | YES             | YES   |
| 28 |      | a        | 252.07                  | 1.34069                | YES             | YES   |
| 29 |      | a        | 257.35                  | 1.83314                | YES             | YES   |
| 30 |      | a        | 282.23                  | 2.78482                | YES             | YES   |
| 31 |      | a        | 304.70                  | 1.73210                | YES             | YES   |
| 32 |      | a        | 315.40                  | 14.71030               | YES             | YES   |
| 33 |      | a        | 335.86                  | 5.17570                | YES             | YES   |
| 34 |      | a        | 354.76                  | 1.22162                | YES             | YES   |
| 35 |      | a        | 369.92                  | 0.72028                | YES             | YES   |
| 36 |      | a        | 408.22                  | 0.34369                | YES             | YES   |
| 37 |      | a        | 431.27                  | 5.32783                | YES             | YES   |
| 38 |      | a        | 438.07                  | 5.17158                | YES             | YES   |
| 39 |      | a        | 456.80                  | 1.67779                | YES             | YES   |
| 40 |      | a        | 461.73                  | 5.07869                | YES             | YES   |
| 41 |      | a        | 474.36                  | 1.72360                | YES             | YES   |
| 42 |      | a        | 478.04                  | 4.53376                | YES             | YES   |
| 43 |      | a        | 478.84                  | 3.91006                | YES             | YES   |
| 44 |      | a        | 492.21                  | 2.50350                | YES             | YES   |
| 45 |      | a        | 516.49                  | 8.45721                | YES             | YES   |
| 46 |      | a        | 521.47                  | 8.82860                | YES             | YES   |
| 47 |      | a        | 532.75                  | 0.54265                | YES             | YES   |
| 48 |      | a        | 544.48                  | 4.99197                | YES             | YES   |
| 49 |      | a        | 561.64                  | 3.10440                | YES             | YES   |
| 50 |      | a        | 598.51                  | 1.83620                | YES             | YES   |

**3bi**

|                                            |                                       |
|--------------------------------------------|---------------------------------------|
| SCF Energy (au) BP86/SV(P)                 | -2508.437513184                       |
| SCF Energy (au) PBE0/def2-TZVPP            | -2507.961431247                       |
| SCF Energy (au) PBE0/def2-TZVPP            | -2507.9706202452 (Toluene Correction) |
| Zero Point Energy (au)                     | 0.3703473                             |
| Chemical Potential (kJ mol <sup>-1</sup> ) | 811.94                                |
| Dispersion Correction (au) PBE0/def2-TZVPP | -0.08161133                           |

xyz coordinates

51

|    |            |            |            |
|----|------------|------------|------------|
| Mn | 1.3161635  | 1.1650105  | 1.4833797  |
| C  | 1.6593210  | 1.4842760  | 3.2533358  |
| C  | 2.9754658  | 0.5498513  | 1.1511691  |
| C  | 1.7828870  | 2.7957704  | 1.0178426  |
| O  | 2.0615356  | 3.8928395  | 0.7197043  |
| O  | 4.0508324  | 0.1662239  | 0.9123884  |
| O  | 1.9147016  | 1.7039945  | 4.3703257  |
| C  | -1.2654764 | 0.4009478  | 2.0629745  |
| C  | -1.4245780 | 2.6380882  | 1.3808562  |
| C  | -2.8135249 | 2.6368021  | 1.5736835  |
| C  | -3.4361283 | 1.4687205  | 2.0420246  |
| C  | -2.6486650 | 0.3311229  | 2.2903335  |
| C  | -0.3040279 | -0.7176535 | 2.2948607  |
| C  | 0.4669182  | -1.2705477 | 1.2171751  |
| C  | 1.3111559  | -2.3784035 | 1.5152922  |
| C  | 1.4018540  | -2.9126801 | 2.8009692  |
| C  | 0.6286248  | -2.3680511 | 3.8499410  |
| C  | -0.2175971 | -1.2889934 | 3.5942423  |
| H  | -0.8858776 | 3.5305258  | 1.0244945  |
| H  | -3.3930862 | 3.5481466  | 1.3592108  |
| H  | -4.5253477 | 1.4398180  | 2.2066012  |
| H  | -3.0952519 | -0.6107349 | 2.6451183  |
| H  | 1.8933520  | -2.8203291 | 0.6906032  |
| H  | 2.0741194  | -3.7644823 | 2.9952703  |
| H  | 0.6930241  | -2.7894471 | 4.8662471  |
| H  | -0.8236213 | -0.8558833 | 4.4069113  |
| N  | -0.6742083 | 1.5465764  | 1.6342579  |
| C  | 0.7019729  | 1.2990344  | -1.6199975 |
| C  | 1.8435003  | 1.9545775  | -2.1486610 |
| C  | 1.7585213  | 2.7274754  | -3.3162998 |
| C  | 0.5255875  | 2.8925712  | -3.9729487 |
| C  | -0.6211451 | 2.2676907  | -3.4516204 |
| C  | -0.5348133 | 1.4762490  | -2.2960780 |
| H  | 2.8126037  | 1.8416152  | -1.6360318 |
| H  | 2.6650371  | 3.2152519  | -3.7125717 |
| H  | 0.4580007  | 3.5111171  | -4.8832601 |
| H  | -1.5954982 | 2.3933875  | -3.9537007 |
| H  | -1.4352166 | 0.9794639  | -1.8993542 |
| C  | 0.7706214  | 0.5081032  | -0.3822832 |
| C  | 0.3582104  | -0.7845400 | -0.2063863 |
| C  | -0.0842868 | -1.7713981 | -1.2312206 |
| C  | -0.9525822 | -3.6806862 | -3.1567423 |
| C  | -1.4574443 | -3.7174792 | -1.8456476 |
| C  | -1.0252052 | -2.7783581 | -0.8960580 |
| C  | 0.4245111  | -1.7590372 | -2.5546917 |
| C  | -0.0064244 | -2.6984375 | -3.5026079 |
| H  | -1.2879851 | -4.4186849 | -3.9042361 |
| H  | -2.1964495 | -4.4845197 | -1.5584149 |
| H  | -1.4334390 | -2.8176048 | 0.1279640  |
| H  | 1.1795737  | -1.0088331 | -2.8347555 |
| H  | 0.4097852  | -2.6684663 | -4.5236090 |

\$vibrational spectrum

| #  | mode | symmetry | wave number<br>cm**(-1) | IR intensity<br>km/mol | selection rules |       |
|----|------|----------|-------------------------|------------------------|-----------------|-------|
| #  |      |          |                         |                        | IR              | RAMAN |
| 1  |      |          | 0.00                    | 0.00000                | -               | -     |
| 2  |      |          | 0.00                    | 0.00000                | -               | -     |
| 3  |      |          | 0.00                    | 0.00000                | -               | -     |
| 4  |      |          | 0.00                    | 0.00000                | -               | -     |
| 5  |      |          | 0.00                    | 0.00000                | -               | -     |
| 6  |      |          | 0.00                    | 0.00000                | -               | -     |
| 7  |      | a        | 25.86                   | 0.09436                | YES             | YES   |
| 8  |      | a        | 29.50                   | 0.18490                | YES             | YES   |
| 9  |      | a        | 40.32                   | 0.30306                | YES             | YES   |
| 10 |      | a        | 41.33                   | 0.44143                | YES             | YES   |
| 11 |      | a        | 52.94                   | 0.08549                | YES             | YES   |
| 12 |      | a        | 54.89                   | 0.03200                | YES             | YES   |
| 13 |      | a        | 59.74                   | 0.25229                | YES             | YES   |
| 14 |      | a        | 68.71                   | 0.07958                | YES             | YES   |
| 15 |      | a        | 77.02                   | 1.14270                | YES             | YES   |
| 16 |      | a        | 82.37                   | 0.69631                | YES             | YES   |
| 17 |      | a        | 86.47                   | 0.49161                | YES             | YES   |
| 18 |      | a        | 95.32                   | 0.27536                | YES             | YES   |
| 19 |      | a        | 97.69                   | 0.57342                | YES             | YES   |
| 20 |      | a        | 104.79                  | 0.29736                | YES             | YES   |
| 21 |      | a        | 108.64                  | 0.81777                | YES             | YES   |
| 22 |      | a        | 145.85                  | 0.50143                | YES             | YES   |
| 23 |      | a        | 161.14                  | 0.79578                | YES             | YES   |
| 24 |      | a        | 176.47                  | 0.59376                | YES             | YES   |
| 25 |      | a        | 190.30                  | 0.24471                | YES             | YES   |
| 26 |      | a        | 213.84                  | 0.19749                | YES             | YES   |
| 27 |      | a        | 222.98                  | 0.33355                | YES             | YES   |
| 28 |      | a        | 229.16                  | 0.75418                | YES             | YES   |
| 29 |      | a        | 250.61                  | 0.27012                | YES             | YES   |
| 30 |      | a        | 262.46                  | 0.46384                | YES             | YES   |
| 31 |      | a        | 322.56                  | 0.72430                | YES             | YES   |
| 32 |      | a        | 331.75                  | 1.46288                | YES             | YES   |
| 33 |      | a        | 362.43                  | 0.29753                | YES             | YES   |
| 34 |      | a        | 402.26                  | 0.16382                | YES             | YES   |
| 35 |      | a        | 405.84                  | 0.12806                | YES             | YES   |
| 36 |      | a        | 423.68                  | 4.33802                | YES             | YES   |
| 37 |      | a        | 440.44                  | 1.56353                | YES             | YES   |
| 38 |      | a        | 446.26                  | 0.33748                | YES             | YES   |
| 39 |      | a        | 456.75                  | 2.33162                | YES             | YES   |
| 40 |      | a        | 462.56                  | 0.15073                | YES             | YES   |
| 41 |      | a        | 478.00                  | 0.30726                | YES             | YES   |
| 42 |      | a        | 484.74                  | 4.15259                | YES             | YES   |
| 43 |      | a        | 494.31                  | 0.50231                | YES             | YES   |
| 44 |      | a        | 508.46                  | 6.46553                | YES             | YES   |
| 45 |      | a        | 517.55                  | 3.38325                | YES             | YES   |
| 46 |      | a        | 532.07                  | 3.93291                | YES             | YES   |
| 47 |      | a        | 540.44                  | 7.63454                | YES             | YES   |
| 48 |      | a        | 550.21                  | 2.02811                | YES             | YES   |
| 49 |      | a        | 571.73                  | 3.60312                | YES             | YES   |
| 50 |      | a        | 584.40                  | 11.80876               | YES             | YES   |



**3bj**

|                                            |                                       |
|--------------------------------------------|---------------------------------------|
| SCF Energy (au) BP86/SV(P)                 | -2360.901282159                       |
| SCF Energy (au) PBE0/def2-TZVPP            | -2360.472310505                       |
| SCF Energy (au) PBE0/def2-TZVPP            | -2360.4790774360 (Toluene Correction) |
| Zero Point Energy (au)                     | 0.4322002                             |
| Chemical Potential (kJ mol <sup>-1</sup> ) | 964.24                                |
| Dispersion Correction (au) PBE0/def2-TZVPP | -0.07607291                           |

xyz coordinates

55

|    |            |            |            |
|----|------------|------------|------------|
| Mn | 1.1113667  | 1.3348724  | 1.5861612  |
| C  | 1.4699877  | 1.6516653  | 3.3555589  |
| C  | 2.8218391  | 0.9509411  | 1.1861731  |
| C  | 1.3330937  | 3.0123303  | 1.1264244  |
| O  | 1.4398562  | 4.1363383  | 0.8073253  |
| O  | 3.9285700  | 0.7046753  | 0.9101342  |
| O  | 1.7404877  | 1.8868693  | 4.4664707  |
| C  | -1.3153556 | 0.1806963  | 2.1987127  |
| C  | -1.8014961 | 2.4149834  | 1.6870746  |
| C  | -3.1674101 | 2.2149889  | 1.9303737  |
| C  | -3.6086731 | 0.9444533  | 2.3338820  |
| C  | -2.6660703 | -0.0889149 | 2.4701893  |
| C  | -0.2103162 | -0.8145822 | 2.3344299  |
| C  | 0.5835278  | -1.2038861 | 1.2030727  |
| C  | 1.5696859  | -2.2093300 | 1.4160756  |
| C  | 1.7680680  | -2.8008236 | 2.6650358  |
| C  | 0.9733459  | -2.4150911 | 3.7657916  |
| C  | -0.0059727 | -1.4356985 | 3.5963081  |
| H  | -1.4013997 | 3.3956176  | 1.3832849  |
| H  | -3.8705058 | 3.0535141  | 1.8076860  |
| H  | -4.6756997 | 0.7575646  | 2.5365705  |
| H  | -2.9662670 | -1.1038212 | 2.7735359  |
| H  | 2.1907749  | -2.5199581 | 0.5601292  |
| H  | 2.5487827  | -3.5692345 | 2.7908357  |
| H  | 1.1263528  | -2.8784258 | 4.7539492  |
| H  | -0.6310610 | -1.1247324 | 4.4495925  |
| N  | -0.9007362 | 1.4207614  | 1.8281105  |
| C  | 0.5340973  | 1.4830152  | -1.5717078 |
| C  | 0.6101608  | 0.6849800  | -0.2971277 |
| C  | 0.3643061  | -0.6474948 | -0.1797845 |
| C  | -0.0538543 | -1.6305026 | -1.2656334 |
| C  | 1.9156541  | 1.8340703  | -2.1693745 |
| H  | -0.0592331 | 0.9432910  | -2.3499352 |
| H  | -0.0129976 | 2.4375429  | -1.3802344 |
| H  | 0.6437644  | -2.5030730 | -1.2694781 |
| H  | 0.0528994  | -1.1530217 | -2.2640702 |
| C  | -1.4947183 | -2.1614023 | -1.1072581 |
| C  | -1.8910644 | -3.1959064 | -2.1738244 |
| H  | -2.2024189 | -1.2998908 | -1.1401389 |
| H  | -1.6118991 | -2.6166206 | -0.0945834 |
| H  | -1.1802749 | -4.0550810 | -2.1326536 |
| H  | -1.7624382 | -2.7453962 | -3.1863849 |
| C  | -3.3279942 | -3.7127451 | -2.0228591 |
| H  | -3.5784653 | -4.4590346 | -2.8089909 |
| H  | -4.0672098 | -2.8831574 | -2.1005283 |
| H  | -3.4804237 | -4.2028354 | -1.0343510 |
| H  | 2.5166168  | 2.3866163  | -1.4115243 |
| C  | 1.8301680  | 2.6701349  | -3.4563536 |
| H  | 2.4734648  | 0.8892167  | -2.3710670 |
| C  | 3.2025361  | 3.0100677  | -4.0528118 |
| H  | 1.2735884  | 3.6134453  | -3.2424775 |
| H  | 1.2206595  | 2.1220902  | -4.2137046 |

|   |           |           |            |
|---|-----------|-----------|------------|
| H | 3.8228817 | 3.5909238 | -3.3334414 |
| H | 3.1062444 | 3.6169160 | -4.9805035 |
| H | 3.7711742 | 2.0880782 | -4.3120859 |

\$vibrational spectrum

| #  | mode | symmetry | wave number<br>cm**(-1) | IR intensity<br>km/mol | selection rules |       |
|----|------|----------|-------------------------|------------------------|-----------------|-------|
| #  |      |          |                         |                        | IR              | RAMAN |
| 1  |      |          | 0.00                    | 0.00000                | -               | -     |
| 2  |      |          | 0.00                    | 0.00000                | -               | -     |
| 3  |      |          | 0.00                    | 0.00000                | -               | -     |
| 4  |      |          | 0.00                    | 0.00000                | -               | -     |
| 5  |      |          | 0.00                    | 0.00000                | -               | -     |
| 6  |      |          | 0.00                    | 0.00000                | -               | -     |
| 7  |      | a        | 13.34                   | 0.11283                | YES             | YES   |
| 8  |      | a        | 25.09                   | 0.03129                | YES             | YES   |
| 9  |      | a        | 28.09                   | 0.18786                | YES             | YES   |
| 10 |      | a        | 37.85                   | 0.64049                | YES             | YES   |
| 11 |      | a        | 45.03                   | 0.03562                | YES             | YES   |
| 12 |      | a        | 53.49                   | 0.24346                | YES             | YES   |
| 13 |      | a        | 58.99                   | 0.36465                | YES             | YES   |
| 14 |      | a        | 64.03                   | 0.04008                | YES             | YES   |
| 15 |      | a        | 68.06                   | 0.24588                | YES             | YES   |
| 16 |      | a        | 79.99                   | 0.05926                | YES             | YES   |
| 17 |      | a        | 84.38                   | 0.19486                | YES             | YES   |
| 18 |      | a        | 92.13                   | 0.18692                | YES             | YES   |
| 19 |      | a        | 94.47                   | 0.83761                | YES             | YES   |
| 20 |      | a        | 99.23                   | 0.48696                | YES             | YES   |
| 21 |      | a        | 101.84                  | 0.42884                | YES             | YES   |
| 22 |      | a        | 111.75                  | 0.05655                | YES             | YES   |
| 23 |      | a        | 118.00                  | 0.13203                | YES             | YES   |
| 24 |      | a        | 125.34                  | 0.16412                | YES             | YES   |
| 25 |      | a        | 135.14                  | 0.13516                | YES             | YES   |
| 26 |      | a        | 170.14                  | 1.02048                | YES             | YES   |
| 27 |      | a        | 182.18                  | 0.33801                | YES             | YES   |
| 28 |      | a        | 193.07                  | 0.50594                | YES             | YES   |
| 29 |      | a        | 213.09                  | 0.22804                | YES             | YES   |
| 30 |      | a        | 224.04                  | 0.17526                | YES             | YES   |
| 31 |      | a        | 241.41                  | 0.41886                | YES             | YES   |
| 32 |      | a        | 247.48                  | 0.21790                | YES             | YES   |
| 33 |      | a        | 257.31                  | 0.63362                | YES             | YES   |
| 34 |      | a        | 287.43                  | 0.63535                | YES             | YES   |
| 35 |      | a        | 300.51                  | 0.52641                | YES             | YES   |
| 36 |      | a        | 317.16                  | 1.48427                | YES             | YES   |
| 37 |      | a        | 343.56                  | 0.72950                | YES             | YES   |
| 38 |      | a        | 357.13                  | 0.08179                | YES             | YES   |
| 39 |      | a        | 385.22                  | 0.44102                | YES             | YES   |
| 40 |      | a        | 417.12                  | 1.89289                | YES             | YES   |
| 41 |      | a        | 428.70                  | 4.60147                | YES             | YES   |
| 42 |      | a        | 458.93                  | 0.22510                | YES             | YES   |
| 43 |      | a        | 459.65                  | 0.88291                | YES             | YES   |
| 44 |      | a        | 468.59                  | 4.26916                | YES             | YES   |
| 45 |      | a        | 474.45                  | 0.45687                | YES             | YES   |
| 46 |      | a        | 484.48                  | 1.64184                | YES             | YES   |
| 47 |      | a        | 495.02                  | 5.00263                | YES             | YES   |
| 48 |      | a        | 510.81                  | 8.03576                | YES             | YES   |
| 49 |      | a        | 527.80                  | 4.57164                | YES             | YES   |
| 50 |      | a        | 536.42                  | 0.97409                | YES             | YES   |

**3ca**

|                                            |                                       |
|--------------------------------------------|---------------------------------------|
| SCF Energy (au) BP86/SV(P)                 | -2678.222750796                       |
| SCF Energy (au) PBE0/def2-TZVPP            | -2677.741199140                       |
| SCF Energy (au) PBE0/def2-TZVPP            | -2677.7536261288 (Toluene Correction) |
| Zero Point Energy (au)                     | 0.4177735                             |
| Chemical Potential (kJ mol <sup>-1</sup> ) | 922.06                                |
| Dispersion Correction (au) PBE0/def2-TZVPP | -0.08529995                           |

xyz coordinates

57

|    |            |            |            |
|----|------------|------------|------------|
| Mn | 0.0636696  | 1.6111328  | -0.8491924 |
| C  | 1.5305880  | 2.1895400  | 0.0801886  |
| C  | 1.0436225  | 0.5324623  | -1.9059389 |
| C  | 0.1688237  | 2.9320425  | -2.0074271 |
| O  | 0.2269811  | 3.8343760  | -2.7520615 |
| O  | 1.6792676  | -0.1601746 | -2.5968114 |
| O  | 2.4830343  | 2.5639964  | 0.6417431  |
| C  | -1.4234957 | 1.7436940  | 1.4825916  |
| C  | -1.9635197 | 3.6789869  | 0.2797856  |
| C  | -2.8252705 | 4.1154596  | 1.2951276  |
| C  | -2.9710718 | 3.3305480  | 2.4511613  |
| C  | -2.2573617 | 2.1245152  | 2.5466824  |
| C  | -0.6267010 | 0.4849612  | 1.4533082  |
| C  | -0.8050618 | -0.4633337 | 0.4197156  |
| C  | -0.1193440 | -1.7697392 | 0.5270746  |
| N  | 0.7698340  | -1.9465157 | 1.6357918  |
| C  | 0.9516228  | -0.9885818 | 2.6165126  |
| C  | 0.2530664  | 0.2037401  | 2.5436844  |
| H  | -1.8053058 | 4.2625049  | -0.6407915 |
| H  | -3.3701369 | 5.0646763  | 1.1751830  |
| H  | -3.6377278 | 3.6509903  | 3.2679992  |
| H  | -2.3495205 | 1.4696870  | 3.4267453  |
| O  | -0.2933570 | -2.6860680 | -0.2787171 |
| C  | 1.9011784  | -1.2733206 | 3.7489853  |
| H  | 0.4115791  | 0.9607065  | 3.3249413  |
| N  | -1.2724795 | 2.5243810  | 0.3818916  |
| C  | -2.5266545 | 0.9478085  | -2.6966211 |
| C  | -2.0482630 | 1.4007388  | -3.9528735 |
| C  | -2.9215011 | 1.6046010  | -5.0314184 |
| C  | -4.3021051 | 1.3820062  | -4.8814423 |
| C  | -4.7995416 | 0.9453821  | -3.6404013 |
| C  | -3.9253567 | 0.7288513  | -2.5653109 |
| H  | -0.9691196 | 1.5761126  | -4.0850712 |
| H  | -2.5192581 | 1.9452965  | -6.0002335 |
| H  | -4.9887656 | 1.5536703  | -5.7270793 |
| H  | -5.8814529 | 0.7740495  | -3.5079285 |
| H  | -4.3226241 | 0.3985879  | -1.5910971 |
| C  | -1.6271725 | 0.7047443  | -1.5632998 |
| C  | -1.7629983 | -0.3443478 | -0.7046295 |
| H  | -2.4346265 | -1.2097105 | -0.8829210 |
| H  | 1.9823365  | -0.3844132 | 4.4063731  |
| H  | 2.9174770  | -1.5269463 | 3.3760077  |
| H  | 1.5564095  | -2.1285800 | 4.3740081  |
| C  | 1.4697500  | -3.2492764 | 1.6847932  |
| H  | 1.4258115  | -3.6430046 | 2.7199194  |
| C  | 2.9070780  | -3.2156046 | 1.1879399  |
| H  | 0.8632975  | -3.9110563 | 1.0317846  |
| C  | 5.5741048  | -3.2363148 | 0.2415008  |
| C  | 5.2677551  | -3.7893264 | 1.4956591  |
| C  | 3.9427165  | -3.7747900 | 1.9648590  |
| C  | 3.2231298  | -2.6724219 | -0.0763338 |
| C  | 4.5476388  | -2.6785393 | -0.5415754 |

|   |           |            |            |
|---|-----------|------------|------------|
| H | 6.6129593 | -3.2415146 | -0.1280164 |
| H | 6.0638343 | -4.2325353 | 2.1167661  |
| H | 3.7094368 | -4.2123280 | 2.9517072  |
| H | 2.4268794 | -2.2536220 | -0.7126693 |
| H | 4.7759111 | -2.2481847 | -1.5305696 |

\$vibrational spectrum

| # | mode | symmetry | wave number<br>cm**(-1) | IR intensity<br>km/mol | selection rules |       |
|---|------|----------|-------------------------|------------------------|-----------------|-------|
| # |      |          |                         |                        | IR              | RAMAN |
|   | 1    |          | 0.00                    | 0.00000                | -               | -     |
|   | 2    |          | 0.00                    | 0.00000                | -               | -     |
|   | 3    |          | 0.00                    | 0.00000                | -               | -     |
|   | 4    |          | 0.00                    | 0.00000                | -               | -     |
|   | 5    |          | 0.00                    | 0.00000                | -               | -     |
|   | 6    |          | 0.00                    | 0.00000                | -               | -     |
|   | 7    | a        | 18.61                   | 0.45792                | YES             | YES   |
|   | 8    | a        | 20.78                   | 0.19310                | YES             | YES   |
|   | 9    | a        | 29.85                   | 0.31391                | YES             | YES   |
|   | 10   | a        | 32.25                   | 0.44016                | YES             | YES   |
|   | 11   | a        | 39.02                   | 0.86850                | YES             | YES   |
|   | 12   | a        | 45.99                   | 0.33234                | YES             | YES   |
|   | 13   | a        | 50.47                   | 0.19399                | YES             | YES   |
|   | 14   | a        | 56.23                   | 1.74737                | YES             | YES   |
|   | 15   | a        | 68.28                   | 1.39703                | YES             | YES   |
|   | 16   | a        | 69.73                   | 0.36509                | YES             | YES   |
|   | 17   | a        | 84.03                   | 1.01838                | YES             | YES   |
|   | 18   | a        | 85.80                   | 0.48941                | YES             | YES   |
|   | 19   | a        | 96.54                   | 1.61114                | YES             | YES   |
|   | 20   | a        | 98.74                   | 0.20719                | YES             | YES   |
|   | 21   | a        | 102.86                  | 0.31583                | YES             | YES   |
|   | 22   | a        | 107.00                  | 0.56136                | YES             | YES   |
|   | 23   | a        | 138.11                  | 0.28842                | YES             | YES   |
|   | 24   | a        | 144.37                  | 0.21805                | YES             | YES   |
|   | 25   | a        | 157.74                  | 0.97101                | YES             | YES   |
|   | 26   | a        | 163.60                  | 1.04911                | YES             | YES   |
|   | 27   | a        | 185.47                  | 0.24484                | YES             | YES   |
|   | 28   | a        | 201.82                  | 1.54103                | YES             | YES   |
|   | 29   | a        | 207.76                  | 1.05400                | YES             | YES   |
|   | 30   | a        | 233.47                  | 0.65986                | YES             | YES   |
|   | 31   | a        | 245.35                  | 1.21255                | YES             | YES   |
|   | 32   | a        | 258.57                  | 1.52062                | YES             | YES   |
|   | 33   | a        | 272.27                  | 1.59868                | YES             | YES   |
|   | 34   | a        | 289.99                  | 0.13259                | YES             | YES   |
|   | 35   | a        | 311.62                  | 4.20087                | YES             | YES   |
|   | 36   | a        | 329.43                  | 1.98900                | YES             | YES   |
|   | 37   | a        | 362.92                  | 2.40152                | YES             | YES   |
|   | 38   | a        | 377.48                  | 2.46814                | YES             | YES   |
|   | 39   | a        | 395.04                  | 12.41401               | YES             | YES   |
|   | 40   | a        | 403.33                  | 0.34388                | YES             | YES   |
|   | 41   | a        | 407.17                  | 0.15896                | YES             | YES   |
|   | 42   | a        | 426.10                  | 2.97114                | YES             | YES   |
|   | 43   | a        | 440.77                  | 1.24828                | YES             | YES   |
|   | 44   | a        | 452.05                  | 1.61406                | YES             | YES   |
|   | 45   | a        | 459.30                  | 0.36019                | YES             | YES   |
|   | 46   | a        | 463.85                  | 1.07994                | YES             | YES   |
|   | 47   | a        | 479.01                  | 2.34965                | YES             | YES   |
|   | 48   | a        | 485.60                  | 1.09251                | YES             | YES   |
|   | 49   | a        | 490.13                  | 4.05355                | YES             | YES   |
|   | 50   | a        | 497.90                  | 6.21632                | YES             | YES   |

**3ca'**

|                                            |                                       |
|--------------------------------------------|---------------------------------------|
| SCF Energy (au) BP86/SV(P)                 | -2678.218280289                       |
| SCF Energy (au) PBE0/def2-TZVPP            | -2677.737373921                       |
| SCF Energy (au) PBE0/def2-TZVPP            | -2677.7503837273 (Toluene Correction) |
| Zero Point Energy (au)                     | 0.4178331                             |
| Chemical Potential (kJ mol <sup>-1</sup> ) | 923.56                                |
| Dispersion Correction (au) PBE0/def2-TZVPP | -0.08515989                           |

xyz coordinates

57

|    |            |            |            |
|----|------------|------------|------------|
| Mn | 0.2297979  | 2.1745138  | -1.3347197 |
| C  | 1.6171610  | 2.8337007  | -0.3315315 |
| C  | 1.2911652  | 1.0907227  | -2.2971892 |
| C  | 0.3343992  | 3.4203114  | -2.5789391 |
| O  | 0.3609910  | 4.2469473  | -3.4069981 |
| O  | 1.9707290  | 0.3987678  | -2.9452103 |
| O  | 2.5256098  | 3.2620245  | 0.2634741  |
| C  | -1.4768114 | 2.3038411  | 0.8307032  |
| C  | -1.8780000 | 4.2761384  | -0.3609654 |
| C  | -2.8525899 | 4.6790307  | 0.5633144  |
| C  | -3.1316419 | 3.8533537  | 1.6646649  |
| C  | -2.4288200 | 2.6441698  | 1.8034043  |
| C  | -0.6369008 | 1.0678879  | 0.8411725  |
| C  | -0.7131995 | 0.1374552  | -0.2162608 |
| C  | 0.1030264  | -1.0946837 | -0.1478118 |
| N  | 0.9108383  | -1.2652747 | 1.0291886  |
| C  | 0.9564707  | -0.3417857 | 2.0553849  |
| C  | 0.1983591  | 0.8129073  | 1.9730585  |
| H  | -1.6156147 | 4.8907832  | -1.2371658 |
| H  | -3.3824773 | 5.6328345  | 0.4151367  |
| H  | -3.8916590 | 4.1451546  | 2.4072869  |
| H  | -2.6179118 | 1.9615775  | 2.6460739  |
| O  | 0.1013544  | -1.9604783 | -1.0212301 |
| C  | 1.8320981  | -0.6166457 | 3.2481219  |
| H  | 0.2658504  | 1.5549755  | 2.7813309  |
| N  | -1.2054328 | 3.1165711  | -0.2206989 |
| H  | -1.9357513 | 1.5131526  | -3.1078177 |
| C  | -1.3585129 | 1.2726871  | -2.1953513 |
| C  | -1.6781994 | 0.2414852  | -1.3724655 |
| C  | -2.7915273 | -0.7316675 | -1.4904575 |
| H  | 1.8106211  | 0.2490556  | 3.9400695  |
| H  | 2.8864511  | -0.8003277 | 2.9471307  |
| H  | 1.4896528  | -1.5130903 | 3.8135666  |
| C  | 1.6729266  | -2.5335254 | 1.0922998  |
| H  | 1.5523006  | -2.9724171 | 2.1030852  |
| C  | 3.1473011  | -2.4144786 | 0.7377724  |
| H  | 1.1659724  | -3.1938085 | 0.3581996  |
| C  | 5.8898231  | -2.2723622 | 0.0562233  |
| C  | 5.4959697  | -2.8570271 | 1.2710702  |
| C  | 4.1330585  | -2.9234494 | 1.6086874  |
| C  | 3.5518096  | -1.8408847 | -0.4872837 |
| C  | 4.9135787  | -1.7658983 | -0.8204193 |
| H  | 6.9582646  | -2.2136907 | -0.2098935 |
| H  | 6.2524496  | -3.2618886 | 1.9637387  |
| H  | 3.8306678  | -3.3859600 | 2.5648116  |
| H  | 2.7967394  | -1.4638642 | -1.1954814 |
| H  | 5.2116198  | -1.3127252 | -1.7801833 |
| C  | -4.9711082 | -2.5509902 | -1.6925383 |
| C  | -4.3148150 | -2.3649062 | -0.4643236 |
| C  | -3.2400184 | -1.4672536 | -0.3665762 |
| C  | -3.4592078 | -0.9391965 | -2.7228957 |
| C  | -4.5351303 | -1.8314917 | -2.8212454 |

|   |            |            |            |
|---|------------|------------|------------|
| H | -5.8131660 | -3.2582268 | -1.7737531 |
| H | -4.6427955 | -2.9243449 | 0.4282348  |
| H | -2.7419062 | -1.3250928 | 0.6078718  |
| H | -3.1110665 | -0.4038709 | -3.6210112 |
| H | -5.0327927 | -1.9787415 | -3.7946602 |

\$vibrational spectrum

| # | mode | symmetry | wave number<br>cm**(-1) | IR intensity<br>km/mol | selection rules |       |
|---|------|----------|-------------------------|------------------------|-----------------|-------|
| # |      |          |                         |                        | IR              | RAMAN |
|   | 1    |          | 0.00                    | 0.00000                | -               | -     |
|   | 2    |          | 0.00                    | 0.00000                | -               | -     |
|   | 3    |          | 0.00                    | 0.00000                | -               | -     |
|   | 4    |          | 0.00                    | 0.00000                | -               | -     |
|   | 5    |          | 0.00                    | 0.00000                | -               | -     |
|   | 6    |          | 0.00                    | 0.00000                | -               | -     |
|   | 7    | a        | 19.21                   | 0.16432                | YES             | YES   |
|   | 8    | a        | 23.47                   | 0.45449                | YES             | YES   |
|   | 9    | a        | 29.88                   | 0.64780                | YES             | YES   |
|   | 10   | a        | 39.48                   | 0.08769                | YES             | YES   |
|   | 11   | a        | 42.64                   | 0.43937                | YES             | YES   |
|   | 12   | a        | 44.77                   | 2.00535                | YES             | YES   |
|   | 13   | a        | 49.07                   | 0.67123                | YES             | YES   |
|   | 14   | a        | 55.87                   | 0.47658                | YES             | YES   |
|   | 15   | a        | 69.43                   | 1.32303                | YES             | YES   |
|   | 16   | a        | 73.15                   | 0.50441                | YES             | YES   |
|   | 17   | a        | 81.07                   | 0.52119                | YES             | YES   |
|   | 18   | a        | 90.08                   | 0.21952                | YES             | YES   |
|   | 19   | a        | 94.00                   | 0.36477                | YES             | YES   |
|   | 20   | a        | 97.20                   | 1.86791                | YES             | YES   |
|   | 21   | a        | 101.54                  | 0.45680                | YES             | YES   |
|   | 22   | a        | 109.42                  | 0.68332                | YES             | YES   |
|   | 23   | a        | 137.50                  | 0.11320                | YES             | YES   |
|   | 24   | a        | 144.65                  | 2.13129                | YES             | YES   |
|   | 25   | a        | 160.28                  | 0.50306                | YES             | YES   |
|   | 26   | a        | 181.46                  | 0.53773                | YES             | YES   |
|   | 27   | a        | 191.63                  | 0.15253                | YES             | YES   |
|   | 28   | a        | 197.91                  | 1.11741                | YES             | YES   |
|   | 29   | a        | 224.72                  | 1.58425                | YES             | YES   |
|   | 30   | a        | 233.22                  | 0.59602                | YES             | YES   |
|   | 31   | a        | 240.86                  | 0.33051                | YES             | YES   |
|   | 32   | a        | 257.01                  | 0.35306                | YES             | YES   |
|   | 33   | a        | 262.34                  | 1.02785                | YES             | YES   |
|   | 34   | a        | 295.93                  | 0.90626                | YES             | YES   |
|   | 35   | a        | 316.02                  | 0.73711                | YES             | YES   |
|   | 36   | a        | 319.52                  | 4.67888                | YES             | YES   |
|   | 37   | a        | 361.51                  | 1.02386                | YES             | YES   |
|   | 38   | a        | 378.85                  | 1.70818                | YES             | YES   |
|   | 39   | a        | 403.51                  | 0.14089                | YES             | YES   |
|   | 40   | a        | 404.39                  | 0.54864                | YES             | YES   |
|   | 41   | a        | 422.33                  | 1.59328                | YES             | YES   |
|   | 42   | a        | 428.18                  | 1.08852                | YES             | YES   |
|   | 43   | a        | 434.15                  | 6.12589                | YES             | YES   |
|   | 44   | a        | 455.16                  | 4.69089                | YES             | YES   |
|   | 45   | a        | 463.52                  | 0.55268                | YES             | YES   |
|   | 46   | a        | 466.18                  | 0.63456                | YES             | YES   |
|   | 47   | a        | 477.75                  | 2.37488                | YES             | YES   |
|   | 48   | a        | 489.32                  | 1.31633                | YES             | YES   |
|   | 49   | a        | 491.10                  | 3.15360                | YES             | YES   |
|   | 50   | a        | 507.95                  | 6.32814                | YES             | YES   |

**3da**

SCF Energy (au) BP86/SV(P) -2409.037058188  
 SCF Energy (au) PBE0/def2-TZVPP -2408.578577113  
 SCF Energy (au) PBE0/def2-TZVPP -2408.5876200366 (Toluene Correction)  
 Zero Point Energy (au) 0.3203729  
 Chemical Potential (kJ mol<sup>-1</sup>) 693.96  
 Dispersion Correction (au) PBE0/def2-TZVPP -0.06859816

xyz coordinates

45

|    |            |            |            |
|----|------------|------------|------------|
| Mn | 1.1173719  | 1.0312839  | 0.3566833  |
| C  | 1.5853652  | 1.5750691  | 2.0338526  |
| C  | 2.7562093  | 0.3798074  | -0.0005427 |
| C  | 1.4880160  | 2.6264045  | -0.3098843 |
| O  | 1.6808120  | 3.7068467  | -0.7146336 |
| O  | 3.8142952  | -0.0423134 | -0.2474111 |
| O  | 1.9234554  | 1.9382031  | 3.0908395  |
| C  | -1.2016639 | 0.0794117  | 1.0776690  |
| C  | -1.8119419 | 2.2544276  | 0.5093869  |
| C  | -3.1491854 | 1.9891519  | 0.8413571  |
| C  | -3.4998775 | 0.7133415  | 1.3151695  |
| C  | -2.5040187 | -0.2736911 | 1.4376583  |
| N  | -0.0460866 | -0.7976603 | 1.1110116  |
| C  | 0.0622448  | -1.7181936 | -0.0254837 |
| C  | 0.2544036  | -2.9977070 | 0.4507647  |
| C  | 0.3053010  | -2.9554018 | 1.8977565  |
| C  | 0.1182089  | -1.6011429 | 2.2925356  |
| H  | -1.4764482 | 3.2355907  | 0.1375581  |
| H  | -3.9049751 | 2.7820805  | 0.7301525  |
| H  | -4.5432122 | 0.4829444  | 1.5843137  |
| H  | -2.7234604 | -1.2890434 | 1.8000928  |
| H  | 0.4354268  | -3.8781585 | -0.1795344 |
| C  | 0.0947015  | -1.1989255 | 3.6301130  |
| N  | -0.8640865 | 1.3059838  | 0.6397878  |
| C  | 0.5895501  | 0.8093864  | -2.7920829 |
| C  | 1.7257682  | 1.5142081  | -3.2664243 |
| C  | 1.7502745  | 2.0697311  | -4.5537556 |
| C  | 0.6308816  | 1.9615782  | -5.3988076 |
| C  | -0.5109802 | 1.2790708  | -4.9444412 |
| C  | -0.5287534 | 0.7059350  | -3.6634394 |
| H  | 2.6131224  | 1.6035099  | -2.6204160 |
| H  | 2.6539177  | 2.5990724  | -4.8995892 |
| H  | 0.6476101  | 2.4121817  | -6.4050893 |
| H  | -1.3988180 | 1.1925165  | -5.5935540 |
| H  | -1.4314143 | 0.1808745  | -3.3093448 |
| C  | 0.5521816  | 0.1851989  | -1.4555397 |
| C  | 0.0988969  | -1.1088118 | -1.3318299 |
| H  | -0.1416297 | -1.7453257 | -2.2054555 |
| C  | 0.2843591  | -2.1930636 | 4.6094536  |
| H  | -0.0474494 | -0.1445334 | 3.9121403  |
| H  | 0.2843663  | -1.9096302 | 5.6742443  |
| C  | 0.4924938  | -3.5405921 | 4.2422694  |
| H  | 0.6490521  | -4.2965513 | 5.0294823  |
| C  | 0.5065170  | -3.9343051 | 2.8944337  |
| H  | 0.6691984  | -4.9887601 | 2.6185332  |

\$vibrational spectrum

| # | mode | symmetry | wave number | IR intensity | selection rules |
|---|------|----------|-------------|--------------|-----------------|
| # |      |          | cm**(-1)    | km/mol       | IR RAMAN        |
|   | 1    |          | 0.00        | 0.00000      | - -             |
|   | 2    |          | 0.00        | 0.00000      | - -             |
|   | 3    |          | 0.00        | 0.00000      | - -             |

|    |   |        |          |     |     |
|----|---|--------|----------|-----|-----|
| 4  |   | 0.00   | 0.00000  | -   | -   |
| 5  |   | 0.00   | 0.00000  | -   | -   |
| 6  |   | 0.00   | 0.00000  | -   | -   |
| 7  | a | 28.92  | 0.40565  | YES | YES |
| 8  | a | 37.26  | 0.06249  | YES | YES |
| 9  | a | 46.50  | 0.25372  | YES | YES |
| 10 | a | 54.32  | 0.01770  | YES | YES |
| 11 | a | 60.74  | 0.30107  | YES | YES |
| 12 | a | 69.85  | 1.24702  | YES | YES |
| 13 | a | 74.70  | 0.45702  | YES | YES |
| 14 | a | 81.89  | 0.81541  | YES | YES |
| 15 | a | 84.73  | 0.24313  | YES | YES |
| 16 | a | 95.20  | 0.25017  | YES | YES |
| 17 | a | 98.42  | 0.55231  | YES | YES |
| 18 | a | 109.24 | 0.18919  | YES | YES |
| 19 | a | 141.07 | 0.11060  | YES | YES |
| 20 | a | 152.17 | 1.49613  | YES | YES |
| 21 | a | 180.10 | 1.27728  | YES | YES |
| 22 | a | 189.89 | 0.05206  | YES | YES |
| 23 | a | 208.92 | 0.97205  | YES | YES |
| 24 | a | 223.73 | 0.79529  | YES | YES |
| 25 | a | 261.43 | 0.47915  | YES | YES |
| 26 | a | 268.90 | 2.74244  | YES | YES |
| 27 | a | 286.18 | 0.52435  | YES | YES |
| 28 | a | 325.79 | 2.71826  | YES | YES |
| 29 | a | 363.13 | 0.70236  | YES | YES |
| 30 | a | 396.44 | 2.80952  | YES | YES |
| 31 | a | 406.95 | 1.05324  | YES | YES |
| 32 | a | 423.82 | 1.01802  | YES | YES |
| 33 | a | 435.22 | 11.95528 | YES | YES |
| 34 | a | 448.51 | 2.81685  | YES | YES |
| 35 | a | 459.52 | 2.65076  | YES | YES |
| 36 | a | 471.73 | 0.78697  | YES | YES |
| 37 | a | 481.06 | 0.16180  | YES | YES |
| 38 | a | 490.42 | 1.12418  | YES | YES |
| 39 | a | 493.26 | 0.25020  | YES | YES |
| 40 | a | 507.66 | 6.69919  | YES | YES |
| 41 | a | 517.95 | 6.01909  | YES | YES |
| 42 | a | 523.84 | 3.06030  | YES | YES |
| 43 | a | 538.84 | 2.98628  | YES | YES |
| 44 | a | 557.16 | 6.48803  | YES | YES |
| 45 | a | 576.80 | 1.67949  | YES | YES |
| 46 | a | 590.09 | 2.39371  | YES | YES |
| 47 | a | 596.12 | 0.77841  | YES | YES |
| 48 | a | 613.34 | 0.49274  | YES | YES |
| 49 | a | 615.28 | 7.44090  | YES | YES |
| 50 | a | 629.75 | 37.33445 | YES | YES |



**3da'**

SCF Energy (au) BP86/SV(P) -2409.034407606  
 SCF Energy (au) PBE0/def2-TZVPP -2408.576885875  
 SCF Energy (au) PBE0/def2-TZVPP -2408.5859493044 (Toluene Correction)  
 Zero Point Energy (au) 0.3203032  
 Chemical Potential (kJ mol<sup>-1</sup>) 693.18  
 Dispersion Correction (au) PBE0/def2-TZVPP -0.06741973

xyz coordinates

45

|    |            |            |            |
|----|------------|------------|------------|
| Mn | 1.4340079  | 1.9877711  | 0.3062720  |
| C  | 1.8611104  | 2.6173755  | 1.9720891  |
| C  | 3.0597099  | 1.2662607  | 0.0417952  |
| C  | 1.8808437  | 3.4962167  | -0.4980946 |
| O  | 2.1288308  | 4.4943936  | -1.0556917 |
| O  | 4.1060042  | 0.7903219  | -0.1480240 |
| O  | 2.1753840  | 3.0340469  | 3.0164158  |
| C  | -0.9286730 | 1.0876959  | 0.9320402  |
| C  | -1.4806415 | 3.2806788  | 0.3782828  |
| C  | -2.8348031 | 3.0320744  | 0.6504191  |
| C  | -3.2248963 | 1.7542155  | 1.0856839  |
| C  | -2.2501376 | 0.7493288  | 1.2310873  |
| N  | 0.2117614  | 0.1930013  | 1.0060692  |
| C  | 0.3495094  | -0.7519616 | -0.1065452 |
| C  | 0.5573961  | -2.0135000 | 0.4037625  |
| C  | 0.5762752  | -1.9380122 | 1.8512294  |
| C  | 0.3552348  | -0.5798653 | 2.2096329  |
| H  | -1.1154830 | 4.2629505  | 0.0383258  |
| H  | -3.5728545 | 3.8391420  | 0.5229589  |
| H  | -4.2819412 | 1.5362782  | 1.3074368  |
| H  | -2.4999159 | -0.2679966 | 1.5676158  |
| H  | 0.7611768  | -2.9052401 | -0.2026803 |
| C  | 0.2927999  | -0.1486692 | 3.5373096  |
| N  | -0.5541226 | 2.3152395  | 0.5282990  |
| H  | 1.0509728  | 1.6100614  | -2.4509835 |
| C  | 0.9377638  | 1.1242993  | -1.4614443 |
| C  | 0.4414493  | -0.1591618 | -1.4407637 |
| C  | 0.0770928  | -0.9643189 | -2.6393310 |
| C  | 0.4769828  | -1.1177742 | 4.5419780  |
| H  | 0.1261389  | 0.9089574  | 3.7929121  |
| H  | 0.4459442  | -0.8111523 | 5.5998927  |
| C  | 0.7192618  | -2.4689522 | 4.2107376  |
| H  | 0.8712784  | -3.2040692 | 5.0182099  |
| C  | 0.7725838  | -2.8913423 | 2.8727324  |
| H  | 0.9617283  | -3.9479961 | 2.6232848  |
| C  | -0.6553254 | -2.4477331 | -4.9556920 |
| C  | -1.3339412 | -2.6473684 | -3.7412208 |
| C  | -0.9712341 | -1.9166997 | -2.5986553 |
| C  | 0.7560605  | -0.7835335 | -3.8694422 |
| C  | 0.3924769  | -1.5111278 | -5.0121335 |
| H  | -0.9365524 | -3.0241700 | -5.8526284 |
| H  | -2.1586505 | -3.3776792 | -3.6821766 |
| H  | -1.5211851 | -2.0737152 | -1.6559985 |
| H  | 1.5978745  | -0.0739001 | -3.9198092 |
| H  | 0.9427041  | -1.3543704 | -5.9551583 |

\$vibrational spectrum

| # | mode | symmetry | wave number | IR intensity | selection rules |
|---|------|----------|-------------|--------------|-----------------|
| # |      |          | cm**(-1)    | km/mol       | IR RAMAN        |
|   | 1    |          | 0.00        | 0.00000      | - -             |
|   | 2    |          | 0.00        | 0.00000      | - -             |
|   | 3    |          | 0.00        | 0.00000      | - -             |

|    |   |        |          |     |     |
|----|---|--------|----------|-----|-----|
| 4  |   | 0.00   | 0.00000  | -   | -   |
| 5  |   | 0.00   | 0.00000  | -   | -   |
| 6  |   | 0.00   | 0.00000  | -   | -   |
| 7  | a | 30.85  | 0.31969  | YES | YES |
| 8  | a | 38.66  | 0.26769  | YES | YES |
| 9  | a | 44.03  | 0.45409  | YES | YES |
| 10 | a | 50.44  | 0.46117  | YES | YES |
| 11 | a | 58.79  | 0.13910  | YES | YES |
| 12 | a | 70.56  | 0.77444  | YES | YES |
| 13 | a | 73.15  | 0.79337  | YES | YES |
| 14 | a | 79.09  | 0.77549  | YES | YES |
| 15 | a | 85.25  | 0.31938  | YES | YES |
| 16 | a | 89.55  | 0.27598  | YES | YES |
| 17 | a | 96.42  | 0.02125  | YES | YES |
| 18 | a | 98.81  | 0.32592  | YES | YES |
| 19 | a | 143.17 | 0.26355  | YES | YES |
| 20 | a | 148.26 | 1.57227  | YES | YES |
| 21 | a | 186.79 | 0.69674  | YES | YES |
| 22 | a | 201.64 | 0.61927  | YES | YES |
| 23 | a | 213.25 | 0.94402  | YES | YES |
| 24 | a | 243.77 | 0.81043  | YES | YES |
| 25 | a | 254.48 | 0.62309  | YES | YES |
| 26 | a | 265.85 | 1.47357  | YES | YES |
| 27 | a | 284.54 | 2.00587  | YES | YES |
| 28 | a | 321.31 | 0.94779  | YES | YES |
| 29 | a | 355.83 | 1.61262  | YES | YES |
| 30 | a | 405.73 | 0.07009  | YES | YES |
| 31 | a | 409.56 | 3.84672  | YES | YES |
| 32 | a | 424.95 | 1.86710  | YES | YES |
| 33 | a | 428.29 | 0.73869  | YES | YES |
| 34 | a | 435.15 | 11.43486 | YES | YES |
| 35 | a | 456.30 | 2.74287  | YES | YES |
| 36 | a | 469.32 | 1.54325  | YES | YES |
| 37 | a | 479.73 | 0.92292  | YES | YES |
| 38 | a | 480.02 | 2.45529  | YES | YES |
| 39 | a | 490.24 | 1.33349  | YES | YES |
| 40 | a | 510.11 | 1.02306  | YES | YES |
| 41 | a | 517.63 | 12.22340 | YES | YES |
| 42 | a | 535.70 | 3.25324  | YES | YES |
| 43 | a | 544.60 | 13.91874 | YES | YES |
| 44 | a | 559.29 | 0.84540  | YES | YES |
| 45 | a | 586.19 | 12.01317 | YES | YES |
| 46 | a | 591.95 | 7.84937  | YES | YES |
| 47 | a | 612.80 | 1.80156  | YES | YES |
| 48 | a | 614.86 | 8.34012  | YES | YES |
| 49 | a | 623.92 | 17.83804 | YES | YES |
| 50 | a | 629.15 | 19.67110 | YES | YES |

**3ea**

|                                            |                                       |
|--------------------------------------------|---------------------------------------|
| SCF Energy (au) BP86/SV(P)                 | -2583.785980288                       |
| SCF Energy (au) PBE0/def2-TZVPP            | -2583.339566677                       |
| SCF Energy (au) PBE0/def2-TZVPP            | -2583.3503113936 (Toluene Correction) |
| Zero Point Energy (au)                     | 0.3875299                             |
| Chemical Potential (kJ mol <sup>-1</sup> ) | 845.24                                |
| Dispersion Correction (au) PBE0/def2-TZVPP | -0.07468328                           |

xyz coordinates

53

|    |            |            |            |
|----|------------|------------|------------|
| Mn | 1.9651695  | 1.7154598  | -0.0109753 |
| C  | 2.3480792  | 2.1006590  | 1.7392816  |
| C  | 3.6973241  | 1.7465730  | -0.5034005 |
| C  | 1.7741513  | 3.3973560  | -0.4504732 |
| O  | 1.6051695  | 4.5182711  | -0.7493858 |
| O  | 4.8192058  | 1.7633187  | -0.8235393 |
| O  | 2.6033358  | 2.3533202  | 2.8488849  |
| C  | -0.4596660 | 0.2929554  | 0.8343070  |
| C  | -1.8865719 | 0.1335204  | 1.1967370  |
| C  | 0.5060078  | -0.8137106 | 1.0092949  |
| C  | 1.4409848  | -1.1567847 | -0.0335687 |
| C  | 2.3040319  | -2.2512157 | 0.2004136  |
| C  | 2.3034134  | -2.9730490 | 1.4097088  |
| C  | 1.3855560  | -2.6246036 | 2.4298631  |
| C  | 0.4961805  | -1.5686285 | 2.2040837  |
| H  | 3.0127941  | -2.5634002 | -0.5827856 |
| O  | 3.2069497  | -3.9838538 | 1.5007735  |
| H  | 1.3545968  | -3.1654988 | 3.3862966  |
| H  | -0.2292973 | -1.3047793 | 2.9906630  |
| N  | 0.0196209  | 1.4114102  | 0.3521336  |
| C  | 1.4688948  | 1.2072974  | -3.1371296 |
| C  | 2.2378999  | 2.2996925  | -3.6143953 |
| C  | 2.1892361  | 2.6901570  | -4.9601881 |
| C  | 1.3497766  | 2.0180364  | -5.8664389 |
| C  | 0.5608614  | 0.9467961  | -5.4106367 |
| C  | 0.6209091  | 0.5470609  | -4.0678958 |
| H  | 2.8950311  | 2.8414346  | -2.9166392 |
| H  | 2.8091079  | 3.5353018  | -5.3038577 |
| H  | 1.3020567  | 2.3353389  | -6.9215125 |
| H  | -0.1133541 | 0.4207023  | -6.1077445 |
| H  | -0.0163634 | -0.2805926 | -3.7138587 |
| C  | 1.5237799  | 0.7697178  | -1.7339513 |
| C  | 1.4568059  | -0.5578925 | -1.3974224 |
| H  | 1.5804506  | -1.3178251 | -2.1995321 |
| C  | -4.6486942 | -0.1440778 | 1.8216597  |
| C  | -3.8957116 | -1.2585711 | 1.3794449  |
| C  | -2.5409938 | -1.1210499 | 1.0794103  |
| C  | -2.6500765 | 1.2351825  | 1.6485544  |
| C  | -4.0110524 | 1.1102307  | 1.9590232  |
| O  | -5.9571818 | -0.3790843 | 2.0947564  |
| H  | -4.4092359 | -2.2272115 | 1.2753295  |
| H  | -1.9733789 | -1.9956395 | 0.7236929  |
| H  | -2.1637524 | 2.2140225  | 1.7981964  |
| H  | -4.5601925 | 1.9905313  | 2.3235603  |
| H  | -0.6890552 | 2.1269921  | 0.1307717  |
| C  | -6.7749949 | 0.6979217  | 2.5289010  |
| H  | -6.4171042 | 1.1218142  | 3.4963019  |
| H  | -7.7888033 | 0.2737619  | 2.6716324  |
| H  | -6.8227436 | 1.5107816  | 1.7666559  |
| C  | 3.2675396  | -4.7477234 | 2.6950863  |
| H  | 2.3081708  | -5.2818123 | 2.8928381  |
| H  | 3.5230979  | -4.1143063 | 3.5769682  |

H 4.0720346 -5.4943078 2.5401061

\$vibrational spectrum

| #  | mode | symmetry | wave number<br>cm** (-1) | IR intensity<br>km/mol | selection rules |       |
|----|------|----------|--------------------------|------------------------|-----------------|-------|
| #  |      |          |                          |                        | IR              | RAMAN |
| 1  |      |          | 0.00                     | 0.00000                | -               | -     |
| 2  |      |          | 0.00                     | 0.00000                | -               | -     |
| 3  |      |          | 0.00                     | 0.00000                | -               | -     |
| 4  |      |          | 0.00                     | 0.00000                | -               | -     |
| 5  |      |          | 0.00                     | 0.00000                | -               | -     |
| 6  |      |          | 0.00                     | 0.00000                | -               | -     |
| 7  |      | a        | 14.51                    | 0.31178                | YES             | YES   |
| 8  |      | a        | 20.08                    | 0.83075                | YES             | YES   |
| 9  |      | a        | 25.76                    | 0.14120                | YES             | YES   |
| 10 |      | a        | 37.40                    | 0.41839                | YES             | YES   |
| 11 |      | a        | 41.74                    | 0.36272                | YES             | YES   |
| 12 |      | a        | 49.73                    | 0.66072                | YES             | YES   |
| 13 |      | a        | 55.73                    | 0.02701                | YES             | YES   |
| 14 |      | a        | 59.24                    | 0.47353                | YES             | YES   |
| 15 |      | a        | 72.72                    | 1.11749                | YES             | YES   |
| 16 |      | a        | 82.52                    | 2.52930                | YES             | YES   |
| 17 |      | a        | 85.90                    | 0.32333                | YES             | YES   |
| 18 |      | a        | 88.22                    | 0.71131                | YES             | YES   |
| 19 |      | a        | 96.11                    | 0.90403                | YES             | YES   |
| 20 |      | a        | 103.97                   | 1.16949                | YES             | YES   |
| 21 |      | a        | 114.15                   | 0.83859                | YES             | YES   |
| 22 |      | a        | 128.32                   | 0.20179                | YES             | YES   |
| 23 |      | a        | 146.83                   | 0.31438                | YES             | YES   |
| 24 |      | a        | 151.89                   | 1.29281                | YES             | YES   |
| 25 |      | a        | 168.11                   | 4.09408                | YES             | YES   |
| 26 |      | a        | 179.42                   | 1.14541                | YES             | YES   |
| 27 |      | a        | 200.02                   | 0.38012                | YES             | YES   |
| 28 |      | a        | 207.62                   | 1.66963                | YES             | YES   |
| 29 |      | a        | 226.15                   | 1.86463                | YES             | YES   |
| 30 |      | a        | 235.19                   | 0.92040                | YES             | YES   |
| 31 |      | a        | 239.41                   | 4.04946                | YES             | YES   |
| 32 |      | a        | 255.06                   | 2.65217                | YES             | YES   |
| 33 |      | a        | 269.98                   | 4.48469                | YES             | YES   |
| 34 |      | a        | 295.05                   | 0.80520                | YES             | YES   |
| 35 |      | a        | 302.33                   | 8.55660                | YES             | YES   |
| 36 |      | a        | 321.72                   | 4.90520                | YES             | YES   |
| 37 |      | a        | 332.49                   | 0.29942                | YES             | YES   |
| 38 |      | a        | 369.86                   | 2.17629                | YES             | YES   |
| 39 |      | a        | 406.94                   | 0.53710                | YES             | YES   |
| 40 |      | a        | 414.79                   | 0.71808                | YES             | YES   |
| 41 |      | a        | 423.67                   | 13.01661               | YES             | YES   |
| 42 |      | a        | 438.34                   | 2.17459                | YES             | YES   |
| 43 |      | a        | 443.47                   | 3.37086                | YES             | YES   |
| 44 |      | a        | 459.10                   | 0.73837                | YES             | YES   |
| 45 |      | a        | 466.53                   | 1.15636                | YES             | YES   |
| 46 |      | a        | 479.54                   | 5.36961                | YES             | YES   |
| 47 |      | a        | 486.06                   | 4.36720                | YES             | YES   |
| 48 |      | a        | 487.99                   | 0.66771                | YES             | YES   |
| 49 |      | a        | 508.96                   | 4.99059                | YES             | YES   |
| 50 |      | a        | 517.77                   | 16.82526               | YES             | YES   |

**3ea'**

|                                            |                                       |
|--------------------------------------------|---------------------------------------|
| SCF Energy (au) BP86/SV(P)                 | -2583.783208244                       |
| SCF Energy (au) PBE0/def2-TZVPP            | -2583.338085995                       |
| SCF Energy (au) PBE0/def2-TZVPP            | -2583.3490964570 (Toluene Correction) |
| Zero Point Energy (au)                     | 0.3874885                             |
| Chemical Potential (kJ mol <sup>-1</sup> ) | 845.08                                |
| Dispersion Correction (au) PBE0/def2-TZVPP | -0.07655516                           |

xyz coordinates

53

|    |            |            |            |
|----|------------|------------|------------|
| Mn | 2.2974223  | 2.1044248  | 0.4369364  |
| C  | 2.5307348  | 2.4894570  | 2.2189721  |
| C  | 3.9961773  | 1.5489878  | 0.2111146  |
| C  | 2.6950408  | 3.7214756  | -0.1135425 |
| O  | 2.9172068  | 4.8004252  | -0.5113261 |
| O  | 5.0878474  | 1.1750973  | 0.0386081  |
| O  | 2.7266135  | 2.7509417  | 3.3388771  |
| C  | -0.3367679 | 1.2586260  | 0.8293903  |
| C  | 0.5650690  | 0.0931635  | 1.0974360  |
| C  | 1.4190804  | -0.4432591 | 0.0796196  |
| C  | 2.2302767  | -1.5631004 | 0.3996120  |
| C  | 2.2196428  | -2.1378792 | 1.6817671  |
| C  | 1.3580732  | -1.6084829 | 2.6786297  |
| C  | 0.5452219  | -0.5219353 | 2.3808379  |
| H  | 2.8695718  | -1.9689312 | -0.3975123 |
| O  | 2.9841743  | -3.1913069 | 2.0626043  |
| H  | 1.3581999  | -2.0726174 | 3.6768799  |
| H  | -0.1263325 | -0.1178035 | 3.1557622  |
| N  | 0.3099283  | 2.3397319  | 0.4920302  |
| H  | 2.0412466  | 1.8893515  | -2.3888246 |
| C  | 1.9315377  | 1.3882431  | -1.4079445 |
| C  | 1.4722862  | 0.1082100  | -1.3263266 |
| C  | 1.0943724  | -0.7792518 | -2.4587611 |
| C  | 0.3152161  | -2.4467361 | -4.6381530 |
| C  | -0.1268456 | -2.7283626 | -3.3346308 |
| C  | 0.2589812  | -1.9081774 | -2.2623096 |
| C  | 1.5376021  | -0.5183121 | -3.7808919 |
| C  | 1.1510932  | -1.3346910 | -4.8523306 |
| H  | 0.0166338  | -3.0916677 | -5.4811835 |
| H  | -0.7832348 | -3.5953591 | -3.1483465 |
| H  | -0.1036392 | -2.1414395 | -1.2473626 |
| H  | 2.2121393  | 0.3334013  | -3.9649028 |
| H  | 1.5166260  | -1.1071508 | -5.8679953 |
| H  | -0.2535891 | 3.1571260  | 0.2143462  |
| C  | -1.8001614 | 1.1572467  | 0.9782788  |
| C  | -4.6305559 | 0.9519304  | 1.2004177  |
| C  | -3.9975071 | 2.2132014  | 1.3019330  |
| C  | -2.6042064 | 2.3022971  | 1.1927338  |
| C  | -2.4532462 | -0.1014638 | 0.8965114  |
| C  | -3.8394319 | -0.2047556 | 0.9993735  |
| O  | -5.9688860 | 0.7507156  | 1.2899569  |
| H  | -4.5802896 | 3.1284535  | 1.4809860  |
| H  | -2.1331432 | 3.2929831  | 1.3085166  |
| H  | -1.8544808 | -1.0106545 | 0.7282756  |
| H  | -4.3478546 | -1.1784593 | 0.9226608  |
| C  | -6.8248518 | 1.8678565  | 1.4820771  |
| H  | -7.8555108 | 1.4617076  | 1.5106249  |
| H  | -6.7418905 | 2.5971653  | 0.6426280  |
| H  | -6.6108553 | 2.3890134  | 2.4446946  |
| C  | 3.8940188  | -3.7532632 | 1.1255572  |
| H  | 4.6405768  | -3.0004128 | 0.7809828  |
| H  | 3.3628970  | -4.1761989 | 0.2411378  |

H 4.4177724 -4.5695610 1.6615739

\$vibrational spectrum

| #  | mode | symmetry | wave number<br>cm**(-1) | IR intensity<br>km/mol | selection rules |       |
|----|------|----------|-------------------------|------------------------|-----------------|-------|
| #  |      |          |                         |                        | IR              | RAMAN |
| 1  |      |          | 0.00                    | 0.00000                | -               | -     |
| 2  |      |          | 0.00                    | 0.00000                | -               | -     |
| 3  |      |          | 0.00                    | 0.00000                | -               | -     |
| 4  |      |          | 0.00                    | 0.00000                | -               | -     |
| 5  |      |          | 0.00                    | 0.00000                | -               | -     |
| 6  |      |          | 0.00                    | 0.00000                | -               | -     |
| 7  |      | a        | 15.63                   | 0.19309                | YES             | YES   |
| 8  |      | a        | 21.60                   | 0.77485                | YES             | YES   |
| 9  |      | a        | 27.86                   | 0.18949                | YES             | YES   |
| 10 |      | a        | 35.39                   | 0.38876                | YES             | YES   |
| 11 |      | a        | 41.33                   | 0.19663                | YES             | YES   |
| 12 |      | a        | 44.02                   | 0.29313                | YES             | YES   |
| 13 |      | a        | 46.80                   | 0.16734                | YES             | YES   |
| 14 |      | a        | 56.38                   | 0.54129                | YES             | YES   |
| 15 |      | a        | 66.90                   | 0.05337                | YES             | YES   |
| 16 |      | a        | 79.52                   | 0.12712                | YES             | YES   |
| 17 |      | a        | 82.08                   | 0.21891                | YES             | YES   |
| 18 |      | a        | 91.71                   | 0.53619                | YES             | YES   |
| 19 |      | a        | 94.79                   | 0.47801                | YES             | YES   |
| 20 |      | a        | 104.40                  | 2.24284                | YES             | YES   |
| 21 |      | a        | 118.46                  | 1.63451                | YES             | YES   |
| 22 |      | a        | 134.87                  | 1.59926                | YES             | YES   |
| 23 |      | a        | 146.93                  | 1.29975                | YES             | YES   |
| 24 |      | a        | 160.54                  | 2.27608                | YES             | YES   |
| 25 |      | a        | 164.22                  | 0.42093                | YES             | YES   |
| 26 |      | a        | 178.65                  | 1.05013                | YES             | YES   |
| 27 |      | a        | 184.01                  | 0.32613                | YES             | YES   |
| 28 |      | a        | 208.70                  | 2.55452                | YES             | YES   |
| 29 |      | a        | 212.55                  | 0.03873                | YES             | YES   |
| 30 |      | a        | 239.72                  | 0.04436                | YES             | YES   |
| 31 |      | a        | 260.67                  | 0.38034                | YES             | YES   |
| 32 |      | a        | 270.38                  | 1.24015                | YES             | YES   |
| 33 |      | a        | 272.85                  | 4.07023                | YES             | YES   |
| 34 |      | a        | 298.06                  | 9.95050                | YES             | YES   |
| 35 |      | a        | 313.32                  | 0.41120                | YES             | YES   |
| 36 |      | a        | 318.07                  | 1.89895                | YES             | YES   |
| 37 |      | a        | 342.89                  | 2.41294                | YES             | YES   |
| 38 |      | a        | 403.82                  | 0.05490                | YES             | YES   |
| 39 |      | a        | 411.48                  | 0.65777                | YES             | YES   |
| 40 |      | a        | 417.18                  | 2.58456                | YES             | YES   |
| 41 |      | a        | 423.43                  | 8.11935                | YES             | YES   |
| 42 |      | a        | 439.84                  | 3.47479                | YES             | YES   |
| 43 |      | a        | 453.26                  | 0.80939                | YES             | YES   |
| 44 |      | a        | 454.51                  | 2.07382                | YES             | YES   |
| 45 |      | a        | 462.67                  | 2.46979                | YES             | YES   |
| 46 |      | a        | 473.90                  | 0.79383                | YES             | YES   |
| 47 |      | a        | 486.97                  | 4.80856                | YES             | YES   |
| 48 |      | a        | 491.01                  | 1.88003                | YES             | YES   |
| 49 |      | a        | 508.87                  | 18.13092               | YES             | YES   |
| 50 |      | a        | 515.17                  | 21.25998               | YES             | YES   |

**3ej**

|                                            |                  |
|--------------------------------------------|------------------|
| SCF Energy (au) BP86/SV(P)                 | -2814.675728998  |
| SCF Energy (au) PBE0/def2-TZVPP            | -2814.194226758  |
| SCF Energy (au) PBE0/def2-TZVPP            | -2814.2067699821 |
| Zero Point Energy (au)                     | 0.4661736        |
| Chemical Potential (kJ mol <sup>-1</sup> ) | 1036.22          |
| Dispersion Correction (au) PBE0/def2-TZVPP | -0.09605401      |

xyz coordinates

63

|    |            |            |            |
|----|------------|------------|------------|
| Mn | 1.8614852  | 1.8272271  | 0.7600694  |
| C  | 2.1430144  | 2.1835792  | 2.5350904  |
| C  | 3.6016826  | 1.4888872  | 0.4378122  |
| C  | 2.0500388  | 3.5079382  | 0.2825505  |
| O  | 2.1338044  | 4.6332195  | -0.0284058 |
| O  | 4.7256063  | 1.2775391  | 0.2046422  |
| O  | 2.3623552  | 2.4227320  | 3.6562518  |
| C  | -0.6663726 | 0.7692076  | 1.3127486  |
| C  | -2.1059430 | 0.5460214  | 1.5349114  |
| C  | 0.3567525  | -0.2822895 | 1.5951215  |
| C  | 1.2683272  | -0.7312598 | 0.5727640  |
| C  | 2.2161006  | -1.7194815 | 0.9236190  |
| C  | 2.3031394  | -2.2513658 | 2.2233758  |
| C  | 1.3933620  | -1.8126449 | 3.2182310  |
| C  | 0.4345636  | -0.8518925 | 2.8895608  |
| H  | 2.9102648  | -2.1009480 | 0.1590779  |
| O  | 3.2741955  | -3.1777885 | 2.4271941  |
| H  | 1.4299679  | -2.2109247 | 4.2423712  |
| H  | -0.2749580 | -0.5153012 | 3.6629406  |
| N  | -0.1318268 | 1.8801622  | 0.8840006  |
| C  | 1.3685189  | 1.7584076  | -2.3716643 |
| C  | 2.4382710  | 2.5544955  | -2.8558632 |
| C  | 2.3323582  | 3.2495815  | -4.0700113 |
| C  | 1.1444819  | 3.1943154  | -4.8210521 |
| C  | 0.0650148  | 2.4276527  | -4.3461588 |
| C  | 0.1764819  | 1.7142486  | -3.1433719 |
| H  | 3.3698502  | 2.6152232  | -2.2702919 |
| H  | 3.1851013  | 3.8506290  | -4.4281487 |
| H  | 1.0581312  | 3.7523870  | -5.7681421 |
| H  | -0.8747790 | 2.3805308  | -4.9221699 |
| H  | -0.6704910 | 1.1094425  | -2.7804303 |
| C  | 1.4573975  | 1.0464670  | -1.0879726 |
| C  | 1.1980761  | -0.2803654 | -0.8690963 |
| C  | 0.9720158  | -1.3465352 | -1.8889216 |
| C  | -4.8941321 | 0.1039928  | 1.9039173  |
| C  | -4.0078525 | -0.9885286 | 1.7460380  |
| C  | -2.6427381 | -0.7687003 | 1.5695352  |
| C  | -3.0037724 | 1.6266523  | 1.7078248  |
| C  | -4.3771537 | 1.4209155  | 1.8878551  |
| O  | -6.2033108 | -0.2092240 | 2.0707061  |
| H  | -4.4261663 | -2.0069376 | 1.7604853  |
| H  | -1.9693135 | -1.6301234 | 1.4357209  |
| H  | -2.6227897 | 2.6613351  | 1.7321583  |
| H  | -5.0348254 | 2.2906856  | 2.0302847  |
| H  | -0.7729605 | 2.6285282  | 0.5818223  |
| C  | -7.1518246 | 0.8383416  | 2.2158342  |
| H  | -6.9520461 | 1.4508053  | 3.1261551  |
| H  | -8.1385144 | 0.3447221  | 2.3199327  |
| H  | -7.1681416 | 1.5035833  | 1.3209379  |
| C  | 3.4333409  | -3.7393500 | 3.7213342  |
| H  | 2.5244138  | -4.3010910 | 4.0423651  |
| H  | 3.6718864  | -2.9596801 | 4.4819780  |

|   |            |            |            |
|---|------------|------------|------------|
| H | 4.2852339  | -4.4442321 | 3.6450391  |
| C | 0.5273194  | -3.4043260 | -3.8078954 |
| C | -0.1128372 | -3.4508009 | -2.5573833 |
| C | 0.1115124  | -2.4386197 | -1.6112747 |
| C | 1.6196019  | -1.3247218 | -3.1499652 |
| C | 1.3975103  | -2.3370985 | -4.0950872 |
| H | 0.3562515  | -4.2003302 | -4.5515579 |
| H | -0.7944227 | -4.2836290 | -2.3148456 |
| H | -0.3988472 | -2.4876558 | -0.6346783 |
| H | 2.3189617  | -0.5071702 | -3.3820013 |
| H | 1.9196277  | -2.2964399 | -5.0658676 |

\$vibrational spectrum

| # | mode | symmetry | wave number | IR intensity | selection rules |       |
|---|------|----------|-------------|--------------|-----------------|-------|
| # |      |          | cm** (-1)   | km/mol       | IR              | RAMAN |
|   | 1    |          | 0.00        | 0.00000      | -               | -     |
|   | 2    |          | 0.00        | 0.00000      | -               | -     |
|   | 3    |          | 0.00        | 0.00000      | -               | -     |
|   | 4    |          | 0.00        | 0.00000      | -               | -     |
|   | 5    |          | 0.00        | 0.00000      | -               | -     |
|   | 6    |          | 0.00        | 0.00000      | -               | -     |
|   | 7    | a        | 16.39       | 0.11460      | YES             | YES   |
|   | 8    | a        | 21.37       | 0.06926      | YES             | YES   |
|   | 9    | a        | 27.70       | 0.35408      | YES             | YES   |
|   | 10   | a        | 34.81       | 0.58605      | YES             | YES   |
|   | 11   | a        | 36.88       | 0.42762      | YES             | YES   |
|   | 12   | a        | 45.70       | 0.11059      | YES             | YES   |
|   | 13   | a        | 47.61       | 0.39275      | YES             | YES   |
|   | 14   | a        | 50.03       | 0.43572      | YES             | YES   |
|   | 15   | a        | 54.24       | 0.47325      | YES             | YES   |
|   | 16   | a        | 56.72       | 0.23312      | YES             | YES   |
|   | 17   | a        | 66.85       | 0.24090      | YES             | YES   |
|   | 18   | a        | 73.98       | 0.70798      | YES             | YES   |
|   | 19   | a        | 83.56       | 0.35825      | YES             | YES   |
|   | 20   | a        | 86.20       | 0.95309      | YES             | YES   |
|   | 21   | a        | 89.67       | 0.50301      | YES             | YES   |
|   | 22   | a        | 98.55       | 0.80454      | YES             | YES   |
|   | 23   | a        | 103.82      | 1.38037      | YES             | YES   |
|   | 24   | a        | 117.97      | 0.55286      | YES             | YES   |
|   | 25   | a        | 130.79      | 1.31610      | YES             | YES   |
|   | 26   | a        | 146.21      | 0.78006      | YES             | YES   |
|   | 27   | a        | 149.50      | 0.24248      | YES             | YES   |
|   | 28   | a        | 154.90      | 1.76928      | YES             | YES   |
|   | 29   | a        | 174.48      | 1.03601      | YES             | YES   |
|   | 30   | a        | 188.27      | 0.72738      | YES             | YES   |
|   | 31   | a        | 204.30      | 1.41449      | YES             | YES   |
|   | 32   | a        | 216.12      | 0.28070      | YES             | YES   |
|   | 33   | a        | 229.06      | 0.17449      | YES             | YES   |
|   | 34   | a        | 232.97      | 1.30367      | YES             | YES   |
|   | 35   | a        | 241.26      | 1.73607      | YES             | YES   |
|   | 36   | a        | 250.95      | 1.60374      | YES             | YES   |
|   | 37   | a        | 253.42      | 1.45897      | YES             | YES   |
|   | 38   | a        | 260.82      | 1.45105      | YES             | YES   |
|   | 39   | a        | 295.61      | 3.47743      | YES             | YES   |
|   | 40   | a        | 296.85      | 2.88335      | YES             | YES   |
|   | 41   | a        | 319.22      | 3.17226      | YES             | YES   |
|   | 42   | a        | 346.77      | 0.76517      | YES             | YES   |
|   | 43   | a        | 401.35      | 0.73305      | YES             | YES   |
|   | 44   | a        | 403.69      | 0.30821      | YES             | YES   |
|   | 45   | a        | 406.71      | 0.54868      | YES             | YES   |
|   | 46   | a        | 413.00      | 0.48532      | YES             | YES   |
|   | 47   | a        | 432.96      | 2.64496      | YES             | YES   |
|   | 48   | a        | 436.95      | 11.61757     | YES             | YES   |



|    |   |        |         |     |     |
|----|---|--------|---------|-----|-----|
| 49 | a | 445.85 | 6.05936 | YES | YES |
| 50 | a | 458.16 | 3.03188 | YES | YES |

**3fa**

SCF Energy (au) BP86/SV(P) -2391.992336901  
 SCF Energy (au) PBE0/def2-TZVPP -2391.554013615  
 SCF Energy (au) PBE0/def2-TZVPP -2391.5628786450 (Toluene Correction)  
 Zero Point Energy (au) 0.3230498  
 Chemical Potential (kJ mol<sup>-1</sup>) 696.59  
 Dispersion Correction (au) PBE0/def2-TZVPP -0.06995959

xyz coordinates

45

|    |            |            |            |
|----|------------|------------|------------|
| Mn | 1.3893256  | 0.0876337  | 0.7929616  |
| C  | 1.9375193  | 0.2572834  | 2.5295937  |
| C  | 2.9494388  | -0.6115109 | 0.2520024  |
| C  | 1.9693035  | 1.6982189  | 0.3876714  |
| O  | 2.3914858  | 2.7574452  | 0.1236272  |
| O  | 3.9613387  | -1.0608219 | -0.1172982 |
| O  | 2.3248523  | 0.3716485  | 3.6248438  |
| C  | -1.1604195 | -0.6563062 | 1.6342081  |
| C  | -1.2997661 | 1.6357765  | 1.1543460  |
| C  | -2.6639989 | 1.6633687  | 1.5209604  |
| C  | -3.2631552 | 0.4780593  | 1.9666187  |
| C  | -2.5078469 | -0.7036217 | 2.0277464  |
| C  | -0.2731292 | -1.8579394 | 1.6496923  |
| C  | 0.2795776  | -2.3939772 | 0.4371837  |
| C  | 0.9424123  | -3.6500144 | 0.5190256  |
| C  | 1.0927035  | -4.3297003 | 1.7297636  |
| C  | 0.5719453  | -3.7794209 | 2.9200566  |
| C  | -0.1155225 | -2.5648225 | 2.8710743  |
| O  | -0.5978210 | 2.6959424  | 0.7265859  |
| H  | -3.2432555 | 2.5949506  | 1.4605104  |
| H  | -4.3259905 | 0.4779088  | 2.2582762  |
| H  | -2.9490841 | -1.6574740 | 2.3522989  |
| H  | 1.3483386  | -4.0826774 | -0.4104427 |
| H  | 1.6229371  | -5.2962157 | 1.7540469  |
| H  | 0.6957706  | -4.3060604 | 3.8800926  |
| H  | -0.5497869 | -2.1386511 | 3.7905931  |
| N  | -0.5745361 | 0.4961078  | 1.2257988  |
| C  | 0.5399501  | 0.2680166  | -2.3132376 |
| C  | 1.6306738  | 1.0208220  | -2.8181526 |
| C  | 1.5528546  | 1.6673793  | -4.0605371 |
| C  | 0.3748659  | 1.6006528  | -4.8265155 |
| C  | -0.7237283 | 0.8716036  | -4.3376641 |
| C  | -0.6410425 | 0.2119474  | -3.1015705 |
| H  | 2.5602130  | 1.0809591  | -2.2308591 |
| H  | 2.4224991  | 2.2343528  | -4.4334197 |
| H  | 0.3123101  | 2.1192231  | -5.7977797 |
| H  | -1.6560547 | 0.8162619  | -4.9252319 |
| H  | -1.5090957 | -0.3495544 | -2.7178697 |
| C  | 0.6145950  | -0.4458345 | -1.0281940 |
| C  | 0.1482964  | -1.7181938 | -0.8798387 |
| H  | -0.1964605 | -2.3395073 | -1.7343853 |
| C  | -1.2373787 | 3.9568516  | 0.5722660  |
| H  | -2.0652377 | 3.9017843  | -0.1713883 |
| H  | -0.4521083 | 4.6418740  | 0.1979794  |
| H  | -1.6277885 | 4.3362318  | 1.5445606  |

\$vibrational spectrum

| # | mode | symmetry | wave number           | IR intensity | selection rules |
|---|------|----------|-----------------------|--------------|-----------------|
| # |      |          | cm <sup>**</sup> (-1) | km/mol       | IR RAMAN        |
|   | 1    |          | 0.00                  | 0.00000      | - -             |
|   | 2    |          | 0.00                  | 0.00000      | - -             |
|   | 3    |          | 0.00                  | 0.00000      | - -             |

|    |   |        |          |     |     |
|----|---|--------|----------|-----|-----|
| 4  |   | 0.00   | 0.00000  | -   | -   |
| 5  |   | 0.00   | 0.00000  | -   | -   |
| 6  |   | 0.00   | 0.00000  | -   | -   |
| 7  | a | 28.02  | 0.61831  | YES | YES |
| 8  | a | 35.88  | 0.12888  | YES | YES |
| 9  | a | 40.30  | 0.55568  | YES | YES |
| 10 | a | 46.39  | 0.18241  | YES | YES |
| 11 | a | 54.16  | 0.21157  | YES | YES |
| 12 | a | 59.73  | 0.20736  | YES | YES |
| 13 | a | 71.76  | 1.45852  | YES | YES |
| 14 | a | 79.33  | 0.73701  | YES | YES |
| 15 | a | 86.90  | 0.34167  | YES | YES |
| 16 | a | 95.76  | 0.47929  | YES | YES |
| 17 | a | 102.86 | 0.18488  | YES | YES |
| 18 | a | 115.16 | 0.56838  | YES | YES |
| 19 | a | 116.40 | 1.09103  | YES | YES |
| 20 | a | 136.46 | 0.21938  | YES | YES |
| 21 | a | 145.56 | 1.21576  | YES | YES |
| 22 | a | 170.97 | 0.23423  | YES | YES |
| 23 | a | 183.55 | 0.65378  | YES | YES |
| 24 | a | 191.89 | 0.07650  | YES | YES |
| 25 | a | 207.95 | 0.58322  | YES | YES |
| 26 | a | 236.01 | 0.87400  | YES | YES |
| 27 | a | 261.57 | 0.19107  | YES | YES |
| 28 | a | 268.32 | 0.04572  | YES | YES |
| 29 | a | 293.06 | 1.07449  | YES | YES |
| 30 | a | 314.39 | 0.85664  | YES | YES |
| 31 | a | 326.70 | 1.24900  | YES | YES |
| 32 | a | 359.74 | 1.05307  | YES | YES |
| 33 | a | 407.02 | 0.18747  | YES | YES |
| 34 | a | 411.91 | 1.53031  | YES | YES |
| 35 | a | 443.70 | 2.15286  | YES | YES |
| 36 | a | 454.02 | 2.16238  | YES | YES |
| 37 | a | 464.43 | 3.10826  | YES | YES |
| 38 | a | 470.00 | 2.56835  | YES | YES |
| 39 | a | 475.86 | 2.54220  | YES | YES |
| 40 | a | 482.34 | 5.04952  | YES | YES |
| 41 | a | 498.98 | 1.16430  | YES | YES |
| 42 | a | 517.77 | 5.41991  | YES | YES |
| 43 | a | 526.65 | 3.00938  | YES | YES |
| 44 | a | 538.96 | 3.75754  | YES | YES |
| 45 | a | 546.71 | 2.40756  | YES | YES |
| 46 | a | 552.90 | 6.08976  | YES | YES |
| 47 | a | 562.03 | 1.58074  | YES | YES |
| 48 | a | 587.33 | 1.67984  | YES | YES |
| 49 | a | 613.53 | 0.81749  | YES | YES |
| 50 | a | 621.75 | 26.77573 | YES | YES |

**3fa'**

SCF Energy (au) BP86/SV(P) -2391.990036695  
 SCF Energy (au) PBE0/def2-TZVPP -2391.552440556  
 SCF Energy (au) PBE0/def2-TZVPP -2391.5618337702 (Toluene Correction)  
 Zero Point Energy (au) 0.3230933  
 Chemical Potential (kJ mol<sup>-1</sup>) 696.35  
 Dispersion Correction (au) PBE0/def2-TZVPP -0.06902345

## xyz coordinates

45

|    |            |            |            |
|----|------------|------------|------------|
| Mn | 1.5958874  | 1.2194711  | 0.8192433  |
| C  | 1.9119078  | 1.6502330  | 2.5727878  |
| C  | 3.2396413  | 0.5500429  | 0.5694944  |
| C  | 2.1294424  | 2.7816886  | 0.2114912  |
| O  | 2.5047679  | 3.7997952  | -0.2258318 |
| O  | 4.3043764  | 0.1080234  | 0.3896308  |
| O  | 2.1565181  | 1.9463207  | 3.6751769  |
| C  | -0.9726965 | 0.3512824  | 1.3474514  |
| C  | -1.2238104 | 2.6135044  | 0.7817135  |
| C  | -2.6236647 | 2.5349199  | 0.9615354  |
| C  | -3.1820694 | 1.3119655  | 1.3556269  |
| C  | -2.3514676 | 0.1968958  | 1.5560837  |
| C  | 0.0240809  | -0.7483572 | 1.5464177  |
| C  | 0.7453824  | -1.3160323 | 0.4449884  |
| C  | 1.5727749  | -2.4420447 | 0.7078335  |
| C  | 1.7033937  | -2.9750288 | 1.9919739  |
| C  | 0.9959331  | -2.4048745 | 3.0721509  |
| C  | 0.1598273  | -1.3105294 | 2.8454942  |
| O  | -0.5535451 | 3.7193529  | 0.4183955  |
| H  | -3.2624194 | 3.4138406  | 0.7985656  |
| H  | -4.2714651 | 1.2304532  | 1.5015322  |
| H  | -2.7555639 | -0.7817643 | 1.8540149  |
| H  | 2.1196722  | -2.8922407 | -0.1363837 |
| H  | 2.3642676  | -3.8411970 | 2.1611832  |
| H  | 1.0999333  | -2.8189897 | 4.0880986  |
| H  | -0.4065927 | -0.8644197 | 3.6795261  |
| N  | -0.4311686 | 1.5383193  | 0.9824148  |
| H  | 1.1435329  | 1.0777133  | -1.9829699 |
| C  | 1.1108779  | 0.5381239  | -1.0164736 |
| C  | 0.6659029  | -0.7479829 | -0.9481779 |
| C  | 0.1936539  | -1.6064361 | -2.0644108 |
| C  | -0.7616451 | -3.2272995 | -4.2059009 |
| C  | -1.0822533 | -3.5470289 | -2.8759322 |
| C  | -0.6110365 | -2.7482870 | -1.8214930 |
| C  | 0.5126253  | -1.3050842 | -3.4133187 |
| C  | 0.0393637  | -2.0992962 | -4.4663745 |
| H  | -1.1272918 | -3.8553737 | -5.0351199 |
| H  | -1.7094212 | -4.4272095 | -2.6544714 |
| H  | -0.8813878 | -3.0085416 | -0.7844734 |
| H  | 1.1592413  | -0.4402662 | -3.6334657 |
| H  | 0.3090477  | -1.8425405 | -5.5048191 |
| C  | -1.2657020 | 4.9239144  | 0.1631691  |
| H  | -1.9903366 | 4.7973859  | -0.6740308 |
| H  | -0.4972931 | 5.6669884  | -0.1255121 |
| H  | -1.8012214 | 5.2805898  | 1.0731657  |

## \$vibrational spectrum

| # | mode | symmetry | wave number | IR intensity | selection rules |
|---|------|----------|-------------|--------------|-----------------|
| # |      |          | cm**(-1)    | km/mol       | IR RAMAN        |
|   | 1    |          | 0.00        | 0.00000      | - -             |
|   | 2    |          | 0.00        | 0.00000      | - -             |
|   | 3    |          | 0.00        | 0.00000      | - -             |

|    |   |        |          |     |     |
|----|---|--------|----------|-----|-----|
| 4  |   | 0.00   | 0.00000  | -   | -   |
| 5  |   | 0.00   | 0.00000  | -   | -   |
| 6  |   | 0.00   | 0.00000  | -   | -   |
| 7  | a | 26.43  | 0.64410  | YES | YES |
| 8  | a | 36.00  | 0.10988  | YES | YES |
| 9  | a | 39.31  | 0.64830  | YES | YES |
| 10 | a | 46.99  | 0.07932  | YES | YES |
| 11 | a | 53.88  | 0.60268  | YES | YES |
| 12 | a | 57.99  | 0.14448  | YES | YES |
| 13 | a | 78.15  | 0.85951  | YES | YES |
| 14 | a | 79.22  | 0.86036  | YES | YES |
| 15 | a | 86.49  | 0.36867  | YES | YES |
| 16 | a | 92.13  | 1.75821  | YES | YES |
| 17 | a | 96.91  | 0.41554  | YES | YES |
| 18 | a | 109.81 | 0.52623  | YES | YES |
| 19 | a | 112.58 | 0.93413  | YES | YES |
| 20 | a | 134.50 | 0.80920  | YES | YES |
| 21 | a | 151.79 | 0.07598  | YES | YES |
| 22 | a | 172.87 | 0.86313  | YES | YES |
| 23 | a | 194.28 | 0.18231  | YES | YES |
| 24 | a | 198.29 | 0.16023  | YES | YES |
| 25 | a | 218.11 | 0.73152  | YES | YES |
| 26 | a | 241.18 | 0.24161  | YES | YES |
| 27 | a | 259.58 | 0.18536  | YES | YES |
| 28 | a | 270.76 | 0.41493  | YES | YES |
| 29 | a | 285.93 | 0.46475  | YES | YES |
| 30 | a | 300.73 | 1.69595  | YES | YES |
| 31 | a | 330.64 | 1.18946  | YES | YES |
| 32 | a | 371.83 | 0.29010  | YES | YES |
| 33 | a | 404.19 | 0.17024  | YES | YES |
| 34 | a | 414.83 | 2.07391  | YES | YES |
| 35 | a | 442.03 | 3.05176  | YES | YES |
| 36 | a | 458.75 | 0.49513  | YES | YES |
| 37 | a | 466.64 | 2.23317  | YES | YES |
| 38 | a | 471.52 | 1.38698  | YES | YES |
| 39 | a | 473.56 | 6.02926  | YES | YES |
| 40 | a | 477.32 | 1.32248  | YES | YES |
| 41 | a | 495.82 | 2.27249  | YES | YES |
| 42 | a | 524.09 | 10.32641 | YES | YES |
| 43 | a | 527.91 | 4.64607  | YES | YES |
| 44 | a | 544.34 | 4.44421  | YES | YES |
| 45 | a | 551.51 | 6.18662  | YES | YES |
| 46 | a | 572.66 | 6.36547  | YES | YES |
| 47 | a | 585.87 | 2.13074  | YES | YES |
| 48 | a | 605.12 | 10.06900 | YES | YES |
| 49 | a | 612.62 | 11.75680 | YES | YES |
| 50 | a | 616.40 | 14.82095 | YES | YES |

**3ga**

|                                            |                                       |
|--------------------------------------------|---------------------------------------|
| SCF Energy (au) BP86/SV(P)                 | -2508.432275552                       |
| SCF Energy (au) PBE0/def2-TZVPP            | -2507.958331998                       |
| SCF Energy (au) PBE0/def2-TZVPP            | -2507.9668305178 (Toluene Correction) |
| Zero Point Energy (au)                     | 0.3699565                             |
| Chemical Potential (kJ mol <sup>-1</sup> ) | 811.35                                |
| Dispersion Correction (au) PBE0/def2-TZVPP | -0.08488781                           |

xyz coordinates

51

|    |            |            |            |
|----|------------|------------|------------|
| Mn | 1.2727708  | -0.4332971 | 0.8077556  |
| C  | 1.7707572  | -0.1092857 | 2.5352243  |
| C  | 2.7991138  | -1.2895947 | 0.4156375  |
| C  | 2.0107523  | 1.0823652  | 0.2975907  |
| O  | 2.5731236  | 2.0592395  | -0.0167825 |
| O  | 3.7865517  | -1.8502685 | 0.1476760  |
| O  | 2.1262832  | 0.1019435  | 3.6266265  |
| C  | -1.2039849 | -1.1041463 | 1.6676312  |
| C  | -1.4649532 | 1.1863673  | 1.1855316  |
| C  | -2.7829765 | 1.1473506  | 1.6963750  |
| C  | -3.3128516 | -0.0465461 | 2.1956206  |
| C  | -2.5085134 | -1.1959060 | 2.1787170  |
| C  | -0.2816629 | -2.2851359 | 1.7060502  |
| C  | 0.1710193  | -2.9476128 | 0.5144462  |
| C  | 0.7821341  | -4.2238243 | 0.6584667  |
| C  | 0.9927149  | -4.8035228 | 1.9103597  |
| C  | 0.5902302  | -4.1259705 | 3.0824595  |
| C  | -0.0546454 | -2.8940219 | 2.9733010  |
| C  | -0.9384016 | 2.4744860  | 0.6543132  |
| H  | -3.3838601 | 2.0688894  | 1.6725252  |
| H  | -4.3432384 | -0.0855125 | 2.5848200  |
| H  | -2.8746612 | -2.1647186 | 2.5513275  |
| H  | 1.1086373  | -4.7475062 | -0.2551866 |
| H  | 1.4833475  | -5.7883762 | 1.9831589  |
| H  | 0.7690507  | -4.5707846 | 4.0745333  |
| H  | -0.4056870 | -2.3746036 | 3.8804688  |
| N  | -0.6960826 | 0.0637399  | 1.1885210  |
| C  | 0.5422277  | -0.4556476 | -2.3450926 |
| C  | 1.6806026  | 0.2122683  | -2.8646464 |
| C  | 1.6670712  | 0.7770619  | -4.1489600 |
| C  | 0.5086847  | 0.7121400  | -4.9447528 |
| C  | -0.6353203 | 0.0661173  | -4.4435357 |
| C  | -0.6175203 | -0.5130755 | -3.1649267 |
| H  | 2.5954765  | 0.2701861  | -2.2546878 |
| H  | 2.5725715  | 1.2772438  | -4.5319369 |
| H  | 0.4969203  | 1.1670741  | -5.9491877 |
| H  | -1.5526615 | 0.0133452  | -5.0541335 |
| H  | -1.5208462 | -1.0092120 | -2.7729391 |
| C  | 0.5483680  | -1.0846884 | -1.0123511 |
| C  | 0.0500190  | -2.3411793 | -0.8280562 |
| H  | -0.2844929 | -2.9933694 | -1.6624084 |
| C  | -0.1022246 | 4.9745170  | -0.3583789 |
| C  | -0.5250942 | 4.8634252  | 0.9777925  |
| C  | -0.9495964 | 3.6232699  | 1.4789414  |
| C  | -0.5122545 | 2.5952404  | -0.6859912 |
| C  | -0.0998301 | 3.8397572  | -1.1866599 |
| H  | 0.2288094  | 5.9491154  | -0.7537595 |
| H  | -0.5213643 | 5.7475064  | 1.6364710  |
| H  | -1.2756174 | 3.5363344  | 2.5289025  |
| H  | -0.5093230 | 1.7116159  | -1.3418794 |
| H  | 0.2304268  | 3.9172061  | -2.2349916 |

\$vibrational spectrum

| #  | mode | symmetry | wave number<br>cm**(-1) | IR intensity<br>km/mol | selection rules |       |
|----|------|----------|-------------------------|------------------------|-----------------|-------|
| #  |      |          |                         |                        | IR              | RAMAN |
| 1  |      |          | 0.00                    | 0.00000                | -               | -     |
| 2  |      |          | 0.00                    | 0.00000                | -               | -     |
| 3  |      |          | 0.00                    | 0.00000                | -               | -     |
| 4  |      |          | 0.00                    | 0.00000                | -               | -     |
| 5  |      |          | 0.00                    | 0.00000                | -               | -     |
| 6  |      |          | 0.00                    | 0.00000                | -               | -     |
| 7  |      | a        | 25.84                   | 0.04845                | YES             | YES   |
| 8  |      | a        | 26.55                   | 0.02052                | YES             | YES   |
| 9  |      | a        | 35.80                   | 0.32049                | YES             | YES   |
| 10 |      | a        | 39.25                   | 0.03499                | YES             | YES   |
| 11 |      | a        | 50.44                   | 0.01163                | YES             | YES   |
| 12 |      | a        | 54.68                   | 0.65930                | YES             | YES   |
| 13 |      | a        | 62.61                   | 0.01939                | YES             | YES   |
| 14 |      | a        | 69.07                   | 0.26530                | YES             | YES   |
| 15 |      | a        | 80.18                   | 1.09165                | YES             | YES   |
| 16 |      | a        | 83.57                   | 0.18719                | YES             | YES   |
| 17 |      | a        | 91.28                   | 0.07543                | YES             | YES   |
| 18 |      | a        | 106.38                  | 0.19122                | YES             | YES   |
| 19 |      | a        | 107.60                  | 0.29624                | YES             | YES   |
| 20 |      | a        | 110.51                  | 0.06144                | YES             | YES   |
| 21 |      | a        | 125.01                  | 1.02495                | YES             | YES   |
| 22 |      | a        | 143.88                  | 0.26257                | YES             | YES   |
| 23 |      | a        | 154.72                  | 0.83859                | YES             | YES   |
| 24 |      | a        | 173.13                  | 1.39150                | YES             | YES   |
| 25 |      | a        | 190.08                  | 0.40542                | YES             | YES   |
| 26 |      | a        | 198.81                  | 0.17350                | YES             | YES   |
| 27 |      | a        | 230.09                  | 0.74020                | YES             | YES   |
| 28 |      | a        | 258.49                  | 0.10339                | YES             | YES   |
| 29 |      | a        | 265.26                  | 0.79766                | YES             | YES   |
| 30 |      | a        | 299.31                  | 0.13424                | YES             | YES   |
| 31 |      | a        | 320.51                  | 1.06814                | YES             | YES   |
| 32 |      | a        | 345.08                  | 1.58179                | YES             | YES   |
| 33 |      | a        | 372.24                  | 0.09462                | YES             | YES   |
| 34 |      | a        | 379.45                  | 1.38213                | YES             | YES   |
| 35 |      | a        | 400.84                  | 0.39030                | YES             | YES   |
| 36 |      | a        | 406.61                  | 0.47180                | YES             | YES   |
| 37 |      | a        | 418.10                  | 1.20687                | YES             | YES   |
| 38 |      | a        | 448.19                  | 0.52402                | YES             | YES   |
| 39 |      | a        | 455.32                  | 0.83848                | YES             | YES   |
| 40 |      | a        | 466.65                  | 0.88780                | YES             | YES   |
| 41 |      | a        | 474.11                  | 0.33446                | YES             | YES   |
| 42 |      | a        | 489.02                  | 4.93957                | YES             | YES   |
| 43 |      | a        | 501.61                  | 1.47829                | YES             | YES   |
| 44 |      | a        | 503.21                  | 11.56780               | YES             | YES   |
| 45 |      | a        | 523.20                  | 2.12663                | YES             | YES   |
| 46 |      | a        | 532.27                  | 2.99148                | YES             | YES   |
| 47 |      | a        | 540.69                  | 5.81623                | YES             | YES   |
| 48 |      | a        | 546.42                  | 3.39454                | YES             | YES   |
| 49 |      | a        | 556.83                  | 2.45245                | YES             | YES   |
| 50 |      | a        | 559.84                  | 2.16353                | YES             | YES   |

**3ga'**

|                                            |                                       |
|--------------------------------------------|---------------------------------------|
| SCF Energy (au) BP86/SV(P)                 | -2508.431196130                       |
| SCF Energy (au) PBE0/def2-TZVPP            | -2507.957419935                       |
| SCF Energy (au) PBE0/def2-TZVPP            | -2507.9666554808 (Toluene Correction) |
| Zero Point Energy (au)                     | 0.3699454                             |
| Chemical Potential (kJ mol <sup>-1</sup> ) | 810.86                                |
| Dispersion Correction (au) PBE0/def2-TZVPP | -0.08233166                           |

xyz coordinates

51

|    |            |            |            |
|----|------------|------------|------------|
| Mn | 1.5028971  | 0.4619076  | 0.8244350  |
| C  | 1.8610594  | 0.9959175  | 2.5377272  |
| C  | 3.0723701  | -0.3902685 | 0.6581873  |
| C  | 2.2134124  | 1.8824475  | 0.0628351  |
| O  | 2.7210324  | 2.7732632  | -0.4990363 |
| O  | 4.0913041  | -0.9452745 | 0.5388870  |
| O  | 2.1319073  | 1.3619097  | 3.6139335  |
| C  | -1.0799484 | -0.2214387 | 1.2500738  |
| C  | -1.2802869 | 2.0496447  | 0.6658923  |
| C  | -2.6890924 | 1.9284459  | 0.6707401  |
| C  | -3.2912878 | 0.7052950  | 0.9841893  |
| C  | -2.4703122 | -0.3910427 | 1.2953473  |
| C  | -0.1231398 | -1.3378904 | 1.5565186  |
| C  | 0.5226403  | -2.0672512 | 0.5052292  |
| C  | 1.2369224  | -3.2447021 | 0.8533463  |
| C  | 1.3388621  | -3.6695889 | 2.1800907  |
| C  | 0.7224657  | -2.9332044 | 3.2154580  |
| C  | -0.0086079 | -1.7861231 | 2.9021516  |
| C  | -0.6547343 | 3.3735215  | 0.4000120  |
| H  | -3.2976659 | 2.8196640  | 0.4539523  |
| H  | -4.3890445 | 0.6080301  | 0.9977374  |
| H  | -2.8893230 | -1.3749234 | 1.5560449  |
| H  | 1.7260810  | -3.8169703 | 0.0487384  |
| H  | 1.9121756  | -4.5804815 | 2.4201307  |
| H  | 0.8104040  | -3.2633623 | 4.2631026  |
| H  | -0.5171513 | -1.2181188 | 3.6987699  |
| N  | -0.5033870 | 0.9675818  | 0.9360635  |
| H  | 1.0805268  | 0.2185027  | -1.9755761 |
| C  | 0.9985047  | -0.2854715 | -0.9926964 |
| C  | 0.5072780  | -1.5551744 | -0.9051413 |
| C  | 0.0395398  | -2.4266975 | -2.0123330 |
| C  | -0.9095803 | -4.0676480 | -4.1396019 |
| C  | -1.3142116 | -4.3163081 | -2.8172489 |
| C  | -0.8461257 | -3.5069520 | -1.7695609 |
| C  | 0.4428470  | -2.1974358 | -3.3524435 |
| C  | -0.0275756 | -3.0017621 | -4.3993144 |
| H  | -1.2735282 | -4.7034473 | -4.9636520 |
| H  | -2.0055557 | -5.1473674 | -2.5972797 |
| H  | -1.1830726 | -3.7081036 | -0.7387922 |
| H  | 1.1530767  | -1.3830656 | -3.5690219 |
| H  | 0.3076621  | -2.8027175 | -5.4312424 |
| C  | 0.4275050  | 5.9411982  | -0.0593172 |
| C  | 0.7627062  | 5.2324467  | 1.1068621  |
| C  | 0.2286643  | 3.9558823  | 1.3363159  |
| C  | -0.9986846 | 4.0989691  | -0.7624859 |
| C  | -0.4540578 | 5.3716305  | -0.9938517 |
| H  | 0.8562097  | 6.9404445  | -0.2417441 |
| H  | 1.4492572  | 5.6761343  | 1.8462932  |
| H  | 0.4867038  | 3.4108470  | 2.2577910  |
| H  | -1.6816539 | 3.6493267  | -1.5025631 |
| H  | -0.7159876 | 5.9197807  | -1.9139531 |



\$vibrational spectrum

| #  | mode | symmetry | wave number<br>cm**(-1) | IR intensity<br>km/mol | selection rules |       |
|----|------|----------|-------------------------|------------------------|-----------------|-------|
| #  |      |          |                         |                        | IR              | RAMAN |
| 1  |      |          | 0.00                    | 0.00000                | -               | -     |
| 2  |      |          | 0.00                    | 0.00000                | -               | -     |
| 3  |      |          | 0.00                    | 0.00000                | -               | -     |
| 4  |      |          | 0.00                    | 0.00000                | -               | -     |
| 5  |      |          | 0.00                    | 0.00000                | -               | -     |
| 6  |      |          | 0.00                    | 0.00000                | -               | -     |
| 7  |      | a        | 21.80                   | 0.16220                | YES             | YES   |
| 8  |      | a        | 28.64                   | 0.04894                | YES             | YES   |
| 9  |      | a        | 36.93                   | 0.20170                | YES             | YES   |
| 10 |      | a        | 41.81                   | 0.24131                | YES             | YES   |
| 11 |      | a        | 46.48                   | 0.08780                | YES             | YES   |
| 12 |      | a        | 56.43                   | 0.06689                | YES             | YES   |
| 13 |      | a        | 63.55                   | 0.47475                | YES             | YES   |
| 14 |      | a        | 69.71                   | 0.08274                | YES             | YES   |
| 15 |      | a        | 80.44                   | 0.85743                | YES             | YES   |
| 16 |      | a        | 83.10                   | 0.29376                | YES             | YES   |
| 17 |      | a        | 90.96                   | 0.67737                | YES             | YES   |
| 18 |      | a        | 97.65                   | 0.51042                | YES             | YES   |
| 19 |      | a        | 104.49                  | 0.67564                | YES             | YES   |
| 20 |      | a        | 109.49                  | 0.09221                | YES             | YES   |
| 21 |      | a        | 121.43                  | 0.40199                | YES             | YES   |
| 22 |      | a        | 144.90                  | 1.16747                | YES             | YES   |
| 23 |      | a        | 160.09                  | 0.03778                | YES             | YES   |
| 24 |      | a        | 175.91                  | 0.87185                | YES             | YES   |
| 25 |      | a        | 202.30                  | 0.09861                | YES             | YES   |
| 26 |      | a        | 209.00                  | 1.87276                | YES             | YES   |
| 27 |      | a        | 232.32                  | 0.56181                | YES             | YES   |
| 28 |      | a        | 247.26                  | 0.89539                | YES             | YES   |
| 29 |      | a        | 279.58                  | 0.06946                | YES             | YES   |
| 30 |      | a        | 291.77                  | 0.24440                | YES             | YES   |
| 31 |      | a        | 317.63                  | 0.51329                | YES             | YES   |
| 32 |      | a        | 332.98                  | 1.35842                | YES             | YES   |
| 33 |      | a        | 354.30                  | 0.79297                | YES             | YES   |
| 34 |      | a        | 401.06                  | 0.13085                | YES             | YES   |
| 35 |      | a        | 402.72                  | 1.42056                | YES             | YES   |
| 36 |      | a        | 404.75                  | 0.25181                | YES             | YES   |
| 37 |      | a        | 414.04                  | 1.99353                | YES             | YES   |
| 38 |      | a        | 456.26                  | 2.32840                | YES             | YES   |
| 39 |      | a        | 458.63                  | 0.40697                | YES             | YES   |
| 40 |      | a        | 466.41                  | 1.26669                | YES             | YES   |
| 41 |      | a        | 473.63                  | 2.91763                | YES             | YES   |
| 42 |      | a        | 475.99                  | 0.58484                | YES             | YES   |
| 43 |      | a        | 495.71                  | 3.10966                | YES             | YES   |
| 44 |      | a        | 507.57                  | 5.64543                | YES             | YES   |
| 45 |      | a        | 522.33                  | 11.32701               | YES             | YES   |
| 46 |      | a        | 530.23                  | 5.55672                | YES             | YES   |
| 47 |      | a        | 542.98                  | 9.38660                | YES             | YES   |
| 48 |      | a        | 555.30                  | 2.52328                | YES             | YES   |
| 49 |      | a        | 573.57                  | 6.35314                | YES             | YES   |
| 50 |      | a        | 604.68                  | 6.94203                | YES             | YES   |

**3ha**

```

SCF Energy (au) BP86/SV(P) -2354.896525758
SCF Energy (au) PBE0/def2-TZVPP -2354.447582458
SCF Energy (au) PBE0/def2-TZVPP -2354.4561647301 (Toluene Correction)
Zero Point Energy (au) 0.3247184
Chemical Potential (kJ mol-1) 698.72
Dispersion Correction (au) PBE0/def2-TZVPP -0.06734630

```

45

|    |            |            |            |
|----|------------|------------|------------|
| Mn | 1.8497483  | 1.1028289  | 0.4584999  |
| C  | 2.3962619  | 1.3587991  | 2.1905971  |
| C  | 3.5333785  | 0.9238504  | -0.1600726 |
| C  | 1.8660182  | 2.8121141  | 0.0884741  |
| O  | 1.8382320  | 3.9560846  | -0.1641401 |
| O  | 4.6199855  | 0.8059896  | -0.5663851 |
| O  | 2.7520255  | 1.5276083  | 3.2875670  |
| C  | -0.7054563 | -0.0098118 | 1.3823506  |
| C  | -2.1394295 | 0.0003492  | 1.7665265  |
| C  | 0.1106602  | -1.2432892 | 1.4872944  |
| C  | 0.9370762  | -1.6614085 | 0.3886899  |
| C  | 1.6651054  | -2.8726502 | 0.5552985  |
| C  | 1.6208297  | -3.6127409 | 1.7405413  |
| C  | 0.8141070  | -3.1833551 | 2.8134205  |
| C  | 0.0544973  | -2.0172268 | 2.6716259  |
| H  | 2.2822125  | -3.2274646 | -0.2869896 |
| H  | 2.2163630  | -4.5362864 | 1.8305783  |
| H  | 0.7747562  | -3.7599084 | 3.7515646  |
| H  | -0.5937026 | -1.6787484 | 3.4963007  |
| N  | -0.0911736 | 1.0514123  | 0.9302620  |
| C  | 1.0975114  | 0.7866837  | -2.6460164 |
| C  | 1.9569420  | 1.8049844  | -3.1326176 |
| C  | 1.8791743  | 2.2488333  | -4.4603469 |
| C  | 0.9228710  | 1.7061809  | -5.3368813 |
| C  | 0.0454810  | 0.7109950  | -4.8701619 |
| C  | 0.1322518  | 0.2579281  | -3.5462639 |
| H  | 2.7068543  | 2.2457189  | -2.4577649 |
| H  | 2.5690828  | 3.0340286  | -4.8122970 |
| H  | 0.8536291  | 2.0660586  | -6.3769160 |
| H  | -0.7189774 | 0.2877369  | -5.5436486 |
| H  | -0.5735378 | -0.5073957 | -3.1825160 |
| C  | 1.1784931  | 0.2943742  | -1.2632088 |
| C  | 0.9589983  | -1.0244135 | -0.9561433 |
| H  | 0.9396469  | -1.7668659 | -1.7838619 |
| C  | -4.8945020 | 0.0414844  | 2.4180097  |
| C  | -4.3029510 | -1.1350330 | 1.9253431  |
| C  | -2.9367949 | -1.1594302 | 1.6077318  |
| C  | -2.7462638 | 1.1766638  | 2.2726661  |
| C  | -4.1106720 | 1.1961662  | 2.5941723  |
| H  | -5.9670312 | 0.0575576  | 2.6722177  |
| H  | -4.9124069 | -2.0426069 | 1.7835704  |
| H  | -2.4797178 | -2.0799137 | 1.2112054  |
| H  | -2.1355333 | 2.0780554  | 2.4498845  |
| H  | -4.5635049 | 2.1166377  | 2.9976601  |
| H  | -0.7005380 | 1.8694253  | 0.7741796  |

\$vibrational spectrum

| # | mode | symmetry | wave number           | IR intensity | selection rules |
|---|------|----------|-----------------------|--------------|-----------------|
| # |      |          | cm <sup>**</sup> (-1) | km/mol       | IR RAMAN        |
|   | 1    |          | 0.00                  | 0.00000      | - -             |
|   | 2    |          | 0.00                  | 0.00000      | - -             |
|   | 3    |          | 0.00                  | 0.00000      | - -             |
|   | 4    |          | 0.00                  | 0.00000      | - -             |

|    |   |        |          |     |     |
|----|---|--------|----------|-----|-----|
| 5  |   | 0.00   | 0.00000  | -   | -   |
| 6  |   | 0.00   | 0.00000  | -   | -   |
| 7  | a | 18.81  | 0.42118  | YES | YES |
| 8  | a | 25.24  | 0.76632  | YES | YES |
| 9  | a | 32.01  | 0.00412  | YES | YES |
| 10 | a | 48.45  | 0.03318  | YES | YES |
| 11 | a | 51.30  | 0.16810  | YES | YES |
| 12 | a | 54.97  | 0.07239  | YES | YES |
| 13 | a | 63.80  | 0.33920  | YES | YES |
| 14 | a | 76.09  | 0.46646  | YES | YES |
| 15 | a | 82.01  | 0.53374  | YES | YES |
| 16 | a | 87.47  | 0.05751  | YES | YES |
| 17 | a | 95.81  | 0.15715  | YES | YES |
| 18 | a | 101.62 | 0.38770  | YES | YES |
| 19 | a | 121.65 | 0.62825  | YES | YES |
| 20 | a | 133.09 | 0.95562  | YES | YES |
| 21 | a | 158.91 | 0.65598  | YES | YES |
| 22 | a | 171.28 | 2.93053  | YES | YES |
| 23 | a | 204.45 | 8.52771  | YES | YES |
| 24 | a | 221.24 | 1.12574  | YES | YES |
| 25 | a | 225.57 | 2.57217  | YES | YES |
| 26 | a | 260.72 | 3.30447  | YES | YES |
| 27 | a | 262.54 | 0.90363  | YES | YES |
| 28 | a | 291.03 | 1.30239  | YES | YES |
| 29 | a | 312.22 | 11.28529 | YES | YES |
| 30 | a | 400.73 | 1.19342  | YES | YES |
| 31 | a | 405.42 | 0.45457  | YES | YES |
| 32 | a | 407.19 | 1.70779  | YES | YES |
| 33 | a | 420.52 | 2.13785  | YES | YES |
| 34 | a | 443.09 | 0.05262  | YES | YES |
| 35 | a | 445.72 | 2.31478  | YES | YES |
| 36 | a | 454.94 | 1.77653  | YES | YES |
| 37 | a | 468.28 | 3.39004  | YES | YES |
| 38 | a | 476.13 | 8.41032  | YES | YES |
| 39 | a | 481.68 | 2.49903  | YES | YES |
| 40 | a | 505.35 | 3.70312  | YES | YES |
| 41 | a | 515.80 | 16.83659 | YES | YES |
| 42 | a | 529.78 | 2.98947  | YES | YES |
| 43 | a | 534.51 | 2.41560  | YES | YES |
| 44 | a | 557.25 | 0.74365  | YES | YES |
| 45 | a | 569.79 | 5.61717  | YES | YES |
| 46 | a | 587.36 | 23.70126 | YES | YES |
| 47 | a | 610.02 | 1.28155  | YES | YES |
| 48 | a | 613.01 | 5.13310  | YES | YES |
| 49 | a | 618.55 | 45.97154 | YES | YES |
| 50 | a | 622.16 | 29.74323 | YES | YES |

**3ha'**

```

SCF Energy (au) BP86/SV(P) -2354.891997893
SCF Energy (au) PBE0/def2-TZVPP -2354.444420890
SCF Energy (au) PBE0/def2-TZVPP -2354.4536324230 (Toluene Correction)
Zero Point Energy (au) 0.3244849
Chemical Potential (kJ mol-1) 697.48
Dispersion Correction (au) PBE0/def2-TZVPP -0.06855975

```

## xyz coordinates

45

```

Mn 2.1473163 1.8360644 0.6549980
C 2.5134529 2.0827923 2.4407545
C 3.8276642 1.3205676 0.2474063
C 2.5110158 3.4912763 0.2106829
O 2.7127039 4.5988164 -0.1110798
O 4.9051974 0.9874349 -0.0456415
O 2.7825573 2.2571479 3.5616359
C -0.5045838 1.0098222 1.1597239
C 0.3466433 -0.2156809 1.2987456
C 1.1533074 -0.6772435 0.2074169
C 1.9544921 -1.8298941 0.4274221
C 1.9730232 -2.4927127 1.6587154
C 1.1679062 -2.0335724 2.7208425
C 0.3570502 -0.9098951 2.5354940
H 2.5671394 -2.2034856 -0.4090707
H 2.6173836 -3.3767309 1.7954675
H 1.1768314 -2.5529085 3.6928652
H -0.2797052 -0.5454997 3.3581044
N 0.1784474 2.0822057 0.8741866
H 1.7080949 1.7931007 -2.1537943
C 1.6406430 1.2400589 -1.1978645
C 1.1492211 -0.0302570 -1.1595934
C 0.6810864 -0.8366841 -2.3202024
C -0.2729277 -2.3459176 -4.5442658
C -0.6369745 -2.7028301 -3.2354055
C -0.1647223 -1.9605573 -2.1409611
C 1.0454677 -0.4997397 -3.6491124
C 0.5730529 -1.2384981 -4.7421129
H -0.6385616 -2.9299659 -5.4049812
H -1.2979833 -3.5687365 -3.0615359
H -0.4650140 -2.2553027 -1.1216221
H 1.7269371 0.3483022 -3.8237653
H 0.8789089 -0.9536970 -5.7629458
H -0.3637364 2.9429415 0.7029938
C -1.9679026 0.9717771 1.3689105
C -4.7780709 0.8918705 1.7096646
C -4.0775780 2.0974632 1.9001518
C -2.6873017 2.1379152 1.7336900
C -2.6839578 -0.2379989 1.1945194
C -4.0764003 -0.2743310 1.3580252
H -5.8718745 0.8613632 1.8428671
H -4.6189613 3.0118872 2.1929712
H -2.1503338 3.0831105 1.9209199
H -2.1398434 -1.1520296 0.9082756
H -4.6191108 -1.2217489 1.2065037

```

## \$vibrational spectrum

| # | mode | symmetry | wave number<br>cm**(-1) | IR intensity<br>km/mol | selection rules<br>IR RAMAN |
|---|------|----------|-------------------------|------------------------|-----------------------------|
| # |      |          |                         |                        |                             |
|   | 1    |          | 0.00                    | 0.00000                | - -                         |
|   | 2    |          | 0.00                    | 0.00000                | - -                         |
|   | 3    |          | 0.00                    | 0.00000                | - -                         |

|    |   |        |          |     |     |
|----|---|--------|----------|-----|-----|
| 4  |   | 0.00   | 0.00000  | -   | -   |
| 5  |   | 0.00   | 0.00000  | -   | -   |
| 6  |   | 0.00   | 0.00000  | -   | -   |
| 7  | a | 19.54  | 0.06232  | YES | YES |
| 8  | a | 30.72  | 0.02671  | YES | YES |
| 9  | a | 33.19  | 0.15313  | YES | YES |
| 10 | a | 35.77  | 0.03630  | YES | YES |
| 11 | a | 45.96  | 0.10263  | YES | YES |
| 12 | a | 48.02  | 0.04022  | YES | YES |
| 13 | a | 70.48  | 0.39725  | YES | YES |
| 14 | a | 74.21  | 0.99841  | YES | YES |
| 15 | a | 80.25  | 0.36004  | YES | YES |
| 16 | a | 82.52  | 0.06077  | YES | YES |
| 17 | a | 88.33  | 0.24855  | YES | YES |
| 18 | a | 98.18  | 0.28632  | YES | YES |
| 19 | a | 118.70 | 0.07417  | YES | YES |
| 20 | a | 139.85 | 0.35431  | YES | YES |
| 21 | a | 159.69 | 2.51650  | YES | YES |
| 22 | a | 180.91 | 1.89325  | YES | YES |
| 23 | a | 188.41 | 0.83797  | YES | YES |
| 24 | a | 202.24 | 0.22099  | YES | YES |
| 25 | a | 238.03 | 1.15483  | YES | YES |
| 26 | a | 272.89 | 5.68818  | YES | YES |
| 27 | a | 279.98 | 3.23812  | YES | YES |
| 28 | a | 299.79 | 0.96235  | YES | YES |
| 29 | a | 311.67 | 1.93608  | YES | YES |
| 30 | a | 399.61 | 0.79350  | YES | YES |
| 31 | a | 401.93 | 0.55369  | YES | YES |
| 32 | a | 405.62 | 1.29219  | YES | YES |
| 33 | a | 411.42 | 4.36505  | YES | YES |
| 34 | a | 448.49 | 2.32542  | YES | YES |
| 35 | a | 454.57 | 0.33329  | YES | YES |
| 36 | a | 462.84 | 0.31148  | YES | YES |
| 37 | a | 464.29 | 11.86901 | YES | YES |
| 38 | a | 473.01 | 1.22050  | YES | YES |
| 39 | a | 481.32 | 7.29869  | YES | YES |
| 40 | a | 509.53 | 3.69401  | YES | YES |
| 41 | a | 516.36 | 36.11068 | YES | YES |
| 42 | a | 528.45 | 2.40935  | YES | YES |
| 43 | a | 551.04 | 3.74614  | YES | YES |
| 44 | a | 572.47 | 7.19075  | YES | YES |
| 45 | a | 576.98 | 21.92925 | YES | YES |
| 46 | a | 607.33 | 4.65353  | YES | YES |
| 47 | a | 609.16 | 12.77565 | YES | YES |
| 48 | a | 611.63 | 38.74875 | YES | YES |
| 49 | a | 614.73 | 0.08764  | YES | YES |
| 50 | a | 621.80 | 51.19677 | YES | YES |

3ia

SCF Energy (au) BP86/SV(P) -2183.142508002  
 SCF Energy (au) PBE0/def2-TZVPP -2182.728425547  
 SCF Energy (au) PBE0/def2-TZVPP -2182.7357796019 (Toluene Correction)  
 Zero Point Energy (au) 0.2600039  
 Chemical Potential (kJ mol<sup>-1</sup>) 539.07  
 Dispersion Correction (au) PBE0/def2-TZVPP -0.05212511

xyz coordinates  
 37

|    |            |            |            |
|----|------------|------------|------------|
| Mn | 1.1217044  | 1.2220039  | 0.8753182  |
| C  | 1.8076113  | 1.3348070  | 2.5749408  |
| C  | 2.7421494  | 1.2108299  | 0.1355115  |
| C  | 1.0314197  | 2.9638585  | 0.6742824  |
| O  | 0.9561462  | 4.1202638  | 0.5160197  |
| O  | 3.8034237  | 1.1815147  | -0.3512306 |
| O  | 2.2450875  | 1.3934439  | 3.6532134  |
| C  | -1.4143192 | 0.1032722  | 1.9810110  |
| C  | -2.7959384 | 0.3246958  | 2.5515022  |
| C  | -0.8039152 | -1.2334355 | 1.9498273  |
| C  | 0.0519542  | -1.6099950 | 0.8541980  |
| C  | 0.6098266  | -2.9207387 | 0.9125915  |
| C  | 0.3739047  | -3.7930724 | 1.9771542  |
| C  | -0.4827170 | -3.4144254 | 3.0316683  |
| C  | -1.0800704 | -2.1522323 | 2.9934884  |
| H  | 1.2462492  | -3.2504250 | 0.0744264  |
| H  | 0.8490304  | -4.7880668 | 1.9802317  |
| H  | -0.6839061 | -4.1018357 | 3.8684900  |
| H  | -1.7572007 | -1.8499947 | 3.8081085  |
| O  | -0.7925239 | 1.0949317  | 1.5367526  |
| C  | 0.2629736  | 0.8812582  | -2.1683061 |
| C  | 0.9689452  | 2.0137198  | -2.6526610 |
| C  | 0.8763286  | 2.4070638  | -3.9944473 |
| C  | 0.0527202  | 1.6977131  | -4.8871522 |
| C  | -0.6794746 | 0.5894331  | -4.4235589 |
| C  | -0.5752960 | 0.1877177  | -3.0853985 |
| H  | 1.6024832  | 2.5887464  | -1.9605507 |
| H  | 1.4454542  | 3.2836622  | -4.3459625 |
| H  | -0.0297790 | 2.0165111  | -5.9395503 |
| H  | -1.3430462 | 0.0381636  | -5.1108464 |
| H  | -1.1711905 | -0.6675105 | -2.7248941 |
| C  | 0.3562945  | 0.4549763  | -0.7681487 |
| C  | 0.2344433  | -0.8812744 | -0.4193629 |
| H  | 0.4020035  | -1.6010875 | -1.2503389 |
| H  | -3.1358146 | 1.3486402  | 2.2980282  |
| H  | -2.7730963 | 0.2339713  | 3.6619155  |
| H  | -3.5218654 | -0.4271045 | 2.1737291  |

\$vibrational spectrum

| # | mode | symmetry | wave number | IR intensity | selection rules |       |
|---|------|----------|-------------|--------------|-----------------|-------|
| # |      |          | cm** (-1)   | km/mol       | IR              | RAMAN |
|   | 1    |          | 0.00        | 0.00000      | -               | -     |
|   | 2    |          | 0.00        | 0.00000      | -               | -     |
|   | 3    |          | 0.00        | 0.00000      | -               | -     |
|   | 4    |          | 0.00        | 0.00000      | -               | -     |
|   | 5    |          | 0.00        | 0.00000      | -               | -     |
|   | 6    |          | 0.00        | 0.00000      | -               | -     |
|   | 7    | a        | 14.40       | 2.54394      | YES             | YES   |
|   | 8    | a        | 24.72       | 0.10778      | YES             | YES   |
|   | 9    | a        | 43.63       | 1.36218      | YES             | YES   |
|   | 10   | a        | 54.12       | 0.02016      | YES             | YES   |

|    |   |        |          |     |     |
|----|---|--------|----------|-----|-----|
| 11 | a | 60.67  | 0.24551  | YES | YES |
| 12 | a | 72.56  | 0.62244  | YES | YES |
| 13 | a | 79.27  | 0.63032  | YES | YES |
| 14 | a | 90.97  | 0.49506  | YES | YES |
| 15 | a | 95.26  | 0.11903  | YES | YES |
| 16 | a | 101.74 | 0.77547  | YES | YES |
| 17 | a | 111.63 | 1.15725  | YES | YES |
| 18 | a | 125.72 | 0.08378  | YES | YES |
| 19 | a | 152.51 | 0.33523  | YES | YES |
| 20 | a | 169.52 | 8.67190  | YES | YES |
| 21 | a | 192.37 | 0.29482  | YES | YES |
| 22 | a | 216.20 | 10.12995 | YES | YES |
| 23 | a | 232.41 | 0.24448  | YES | YES |
| 24 | a | 241.88 | 0.75526  | YES | YES |
| 25 | a | 252.52 | 6.68820  | YES | YES |
| 26 | a | 293.90 | 4.90373  | YES | YES |
| 27 | a | 353.55 | 2.36095  | YES | YES |
| 28 | a | 392.82 | 1.60206  | YES | YES |
| 29 | a | 406.09 | 0.60766  | YES | YES |
| 30 | a | 416.38 | 3.11805  | YES | YES |
| 31 | a | 431.45 | 0.83475  | YES | YES |
| 32 | a | 452.00 | 0.63243  | YES | YES |
| 33 | a | 467.01 | 0.40503  | YES | YES |
| 34 | a | 474.57 | 3.83516  | YES | YES |
| 35 | a | 487.49 | 12.99325 | YES | YES |
| 36 | a | 493.95 | 0.21123  | YES | YES |
| 37 | a | 520.07 | 1.81214  | YES | YES |
| 38 | a | 527.15 | 5.65477  | YES | YES |
| 39 | a | 533.50 | 0.52258  | YES | YES |
| 40 | a | 564.99 | 3.57873  | YES | YES |
| 41 | a | 579.71 | 0.36755  | YES | YES |
| 42 | a | 600.52 | 1.20567  | YES | YES |
| 43 | a | 611.17 | 1.41382  | YES | YES |
| 44 | a | 612.98 | 25.26251 | YES | YES |
| 45 | a | 621.48 | 7.53164  | YES | YES |
| 46 | a | 629.58 | 25.23277 | YES | YES |
| 47 | a | 645.56 | 30.57528 | YES | YES |
| 48 | a | 688.43 | 28.37147 | YES | YES |
| 49 | a | 697.66 | 30.34196 | YES | YES |
| 50 | a | 717.08 | 11.57712 | YES | YES |

3ia'

SCF Energy (au) BP86/SV(P) -2183.136961706  
 SCF Energy (au) PBE0/def2-TZVPP -2182.727556389  
 SCF Energy (au) PBE0/def2-TZVPP -2182.7350096537 (Toluene Correction)  
 Zero Point Energy (au) 0.2598973  
 Chemical Potential (kJ mol<sup>-1</sup>) 537.84  
 Dispersion Correction (au) PBE0/def2-TZVPP -0.05187819

xyz coordinates  
 37

|    |            |            |            |
|----|------------|------------|------------|
| Mn | 1.1456731  | 2.4084287  | 1.0514434  |
| C  | 1.2843480  | 3.0374348  | 2.7773269  |
| C  | 2.8931301  | 2.1414828  | 0.8561337  |
| C  | 1.3131216  | 4.0054815  | 0.3609113  |
| O  | 1.3955239  | 5.0598688  | -0.1377030 |
| O  | 4.0299225  | 1.9255071  | 0.7060206  |
| O  | 1.4135291  | 3.4230247  | 3.8688410  |
| C  | -1.5463574 | 1.2579627  | 1.3745898  |
| C  | -3.0483446 | 1.3691686  | 1.4009870  |
| C  | -0.8895210 | -0.0592515 | 1.6022068  |
| C  | 0.0720327  | -0.5659509 | 0.6705188  |
| C  | 0.6462642  | -1.8285391 | 0.9599993  |
| C  | 0.3247948  | -2.5445601 | 2.1197813  |
| C  | -0.6257246 | -2.0367553 | 3.0241373  |
| C  | -1.2423982 | -0.8112986 | 2.7495235  |
| H  | 1.3697638  | -2.2486436 | 0.2426544  |
| H  | 0.8152544  | -3.5120111 | 2.3177643  |
| H  | -0.8882081 | -2.5966910 | 3.9362526  |
| H  | -1.9917681 | -0.4121785 | 3.4530209  |
| O  | -0.8668938 | 2.2793093  | 1.1438564  |
| H  | 1.1975253  | 1.7970538  | -1.6421925 |
| C  | 0.9189164  | 1.4000598  | -0.6460373 |
| C  | 0.4425086  | 0.1143609  | -0.6185621 |
| C  | 0.3414973  | -0.7211797 | -1.8562369 |
| H  | -3.3556380 | 2.4322364  | 1.3398434  |
| H  | -3.4756974 | 0.9006292  | 2.3143817  |
| H  | -3.4705582 | 0.8113526  | 0.5333939  |
| C  | 0.0811686  | -2.2377162 | -4.2519088 |
| C  | -0.8457575 | -2.3966710 | -3.2071173 |
| C  | -0.7134116 | -1.6537369 | -2.0239658 |
| C  | 1.2731481  | -0.5851976 | -2.9146930 |
| C  | 1.1430398  | -1.3293998 | -4.0968532 |
| H  | -0.0187059 | -2.8250778 | -5.1797095 |
| H  | -1.6839069 | -3.1057620 | -3.3152054 |
| H  | -1.4534085 | -1.7869382 | -1.2170713 |
| H  | 2.1270325  | 0.1014893  | -2.7953285 |
| H  | 1.8881048  | -1.2072921 | -4.9010036 |

\$vibrational spectrum

| # | mode | symmetry | wave number | IR intensity | selection rules |       |
|---|------|----------|-------------|--------------|-----------------|-------|
| # |      |          | cm** (-1)   | km/mol       | IR              | RAMAN |
|   | 1    |          | 0.00        | 0.00000      | -               | -     |
|   | 2    |          | 0.00        | 0.00000      | -               | -     |
|   | 3    |          | 0.00        | 0.00000      | -               | -     |
|   | 4    |          | 0.00        | 0.00000      | -               | -     |
|   | 5    |          | 0.00        | 0.00000      | -               | -     |
|   | 6    |          | 0.00        | 0.00000      | -               | -     |
|   | 7    | a        | 11.03       | 0.04299      | YES             | YES   |
|   | 8    | a        | 29.88       | 0.03834      | YES             | YES   |
|   | 9    | a        | 43.82       | 0.16594      | YES             | YES   |
|   | 10   | a        | 51.24       | 0.15359      | YES             | YES   |



|    |   |        |          |     |     |
|----|---|--------|----------|-----|-----|
| 11 | a | 61.74  | 0.30398  | YES | YES |
| 12 | a | 69.23  | 1.44302  | YES | YES |
| 13 | a | 79.86  | 0.04878  | YES | YES |
| 14 | a | 85.57  | 0.38966  | YES | YES |
| 15 | a | 88.81  | 0.11878  | YES | YES |
| 16 | a | 97.83  | 0.27936  | YES | YES |
| 17 | a | 106.39 | 0.50957  | YES | YES |
| 18 | a | 110.87 | 0.22317  | YES | YES |
| 19 | a | 146.59 | 2.94774  | YES | YES |
| 20 | a | 157.49 | 1.94876  | YES | YES |
| 21 | a | 204.75 | 0.39131  | YES | YES |
| 22 | a | 218.92 | 2.28317  | YES | YES |
| 23 | a | 231.59 | 0.37369  | YES | YES |
| 24 | a | 252.43 | 0.43101  | YES | YES |
| 25 | a | 289.71 | 0.21352  | YES | YES |
| 26 | a | 309.83 | 0.54719  | YES | YES |
| 27 | a | 358.37 | 0.71677  | YES | YES |
| 28 | a | 374.94 | 1.21258  | YES | YES |
| 29 | a | 404.39 | 0.02014  | YES | YES |
| 30 | a | 417.18 | 2.72831  | YES | YES |
| 31 | a | 427.00 | 1.39593  | YES | YES |
| 32 | a | 445.95 | 1.88235  | YES | YES |
| 33 | a | 457.11 | 1.40503  | YES | YES |
| 34 | a | 465.73 | 7.32504  | YES | YES |
| 35 | a | 486.02 | 2.33309  | YES | YES |
| 36 | a | 521.44 | 4.72483  | YES | YES |
| 37 | a | 523.49 | 5.61477  | YES | YES |
| 38 | a | 527.41 | 4.31855  | YES | YES |
| 39 | a | 547.92 | 4.01688  | YES | YES |
| 40 | a | 577.62 | 2.23764  | YES | YES |
| 41 | a | 598.63 | 2.96917  | YES | YES |
| 42 | a | 599.31 | 11.79126 | YES | YES |
| 43 | a | 612.20 | 1.68466  | YES | YES |
| 44 | a | 614.93 | 32.37495 | YES | YES |
| 45 | a | 618.76 | 29.53671 | YES | YES |
| 46 | a | 630.83 | 8.60057  | YES | YES |
| 47 | a | 657.53 | 6.90263  | YES | YES |
| 48 | a | 695.80 | 27.47499 | YES | YES |
| 49 | a | 696.46 | 8.46114  | YES | YES |
| 50 | a | 704.54 | 39.55734 | YES | YES |

**3ja**

|                                            |                                       |
|--------------------------------------------|---------------------------------------|
| SCF Energy (au) BP86/SV(P)                 | -2452.103080854                       |
| SCF Energy (au) PBE0/def2-TZVPP            | -2451.641880652                       |
| SCF Energy (au) PBE0/def2-TZVPP            | -2451.6499605316 (Toluene Correction) |
| Zero Point Energy (au)                     | 0.3448731                             |
| Chemical Potential (kJ mol <sup>-1</sup> ) | 740.54                                |
| Dispersion Correction (au) PBE0/def2-TZVPP | -0.06861384                           |

xyz coordinates

48

|    |            |            |            |
|----|------------|------------|------------|
| Mn | 1.6497721  | 1.3358800  | 0.5377851  |
| C  | 2.2607111  | 1.1039574  | 2.2578338  |
| C  | 3.2884896  | 1.2193251  | -0.1490047 |
| C  | 1.7869671  | 3.0934275  | 0.5737376  |
| O  | 1.8781603  | 4.2597576  | 0.5697864  |
| O  | 4.3558709  | 1.1265886  | -0.6172802 |
| O  | 2.6536735  | 0.9511328  | 3.3429371  |
| C  | -1.0368873 | 0.4731728  | 1.4794316  |
| C  | -2.3887641 | 0.7350323  | 2.0440928  |
| C  | -0.4926578 | -0.8470109 | 1.3727270  |
| C  | 0.4605652  | -1.1886026 | 0.3999303  |
| C  | 1.0481149  | -2.5666603 | 0.4574499  |
| O  | -0.3496116 | 1.4707664  | 1.0859053  |
| C  | 0.6702105  | 1.4277704  | -2.5020987 |
| C  | 1.2395772  | 2.6775180  | -2.8692160 |
| C  | 1.0967138  | 3.1776742  | -4.1690384 |
| C  | 0.3650077  | 2.4529686  | -5.1285574 |
| C  | -0.2254533 | 1.2226328  | -4.7807425 |
| C  | -0.0754722 | 0.7160695  | -3.4848411 |
| H  | 1.7947466  | 3.2520937  | -2.1120276 |
| H  | 1.5514070  | 4.1454229  | -4.4374168 |
| H  | 0.2445661  | 2.8532503  | -6.1490767 |
| H  | -0.8099279 | 0.6599920  | -5.5274730 |
| H  | -0.5511774 | -0.2390094 | -3.2066295 |
| C  | 0.8194577  | 0.9109833  | -1.1540798 |
| C  | 0.7721341  | -0.4483760 | -0.8194785 |
| H  | 1.1284006  | -1.1315150 | -1.6198489 |
| H  | -0.8315661 | -1.6271544 | 2.0700320  |
| C  | 2.2169575  | -5.1499094 | 0.5825091  |
| C  | 2.9898023  | -4.0412065 | 0.1967011  |
| C  | 2.4100757  | -2.7654005 | 0.1272300  |
| C  | 0.2826793  | -3.6927490 | 0.8410522  |
| C  | 0.8598144  | -4.9705594 | 0.8999324  |
| H  | 2.6713797  | -6.1531857 | 0.6332252  |
| H  | 4.0574584  | -4.1677738 | -0.0476822 |
| H  | 3.0296920  | -1.8999209 | -0.1607391 |
| H  | -0.7895347 | -3.5740838 | 1.0665908  |
| H  | 0.2402736  | -5.8351928 | 1.1902115  |
| C  | -4.9417765 | 1.3110561  | 3.1085565  |
| C  | -4.5833454 | -0.0176796 | 2.8192199  |
| C  | -3.3178408 | -0.3043725 | 2.2870562  |
| C  | -2.7625783 | 2.0690374  | 2.3354150  |
| C  | -4.0287738 | 2.3534290  | 2.8623771  |
| H  | -5.9378888 | 1.5353865  | 3.5250813  |
| H  | -5.2993217 | -0.8358795 | 3.0019444  |
| H  | -3.0572988 | -1.3454709 | 2.0391041  |
| H  | -2.0348341 | 2.8714214  | 2.1397768  |
| H  | -4.3079682 | 3.3959661  | 3.0875984  |

\$vibrational spectrum

| #  | mode | symmetry | wave number<br>cm**(-1) | IR intensity<br>km/mol | selection rules |       |
|----|------|----------|-------------------------|------------------------|-----------------|-------|
| #  |      |          |                         |                        | IR              | RAMAN |
| 1  |      |          | 0.00                    | 0.00000                | -               | -     |
| 2  |      |          | 0.00                    | 0.00000                | -               | -     |
| 3  |      |          | 0.00                    | 0.00000                | -               | -     |
| 4  |      |          | 0.00                    | 0.00000                | -               | -     |
| 5  |      |          | 0.00                    | 0.00000                | -               | -     |
| 6  |      |          | 0.00                    | 0.00000                | -               | -     |
| 7  |      | a        | 14.61                   | 0.38846                | YES             | YES   |
| 8  |      | a        | 22.13                   | 1.40826                | YES             | YES   |
| 9  |      | a        | 29.62                   | 0.58524                | YES             | YES   |
| 10 |      | a        | 35.83                   | 0.11973                | YES             | YES   |
| 11 |      | a        | 37.15                   | 1.03095                | YES             | YES   |
| 12 |      | a        | 45.28                   | 0.39974                | YES             | YES   |
| 13 |      | a        | 51.69                   | 0.80298                | YES             | YES   |
| 14 |      | a        | 53.97                   | 0.16678                | YES             | YES   |
| 15 |      | a        | 59.96                   | 0.19192                | YES             | YES   |
| 16 |      | a        | 83.78                   | 0.20446                | YES             | YES   |
| 17 |      | a        | 88.78                   | 0.11842                | YES             | YES   |
| 18 |      | a        | 94.65                   | 0.05377                | YES             | YES   |
| 19 |      | a        | 108.34                  | 1.43645                | YES             | YES   |
| 20 |      | a        | 112.52                  | 0.66592                | YES             | YES   |
| 21 |      | a        | 121.74                  | 2.50328                | YES             | YES   |
| 22 |      | a        | 137.87                  | 2.51867                | YES             | YES   |
| 23 |      | a        | 154.04                  | 1.13695                | YES             | YES   |
| 24 |      | a        | 159.72                  | 19.21260               | YES             | YES   |
| 25 |      | a        | 208.77                  | 5.50424                | YES             | YES   |
| 26 |      | a        | 223.45                  | 5.51475                | YES             | YES   |
| 27 |      | a        | 236.61                  | 6.29007                | YES             | YES   |
| 28 |      | a        | 244.48                  | 0.51186                | YES             | YES   |
| 29 |      | a        | 263.63                  | 0.36410                | YES             | YES   |
| 30 |      | a        | 300.33                  | 15.23751               | YES             | YES   |
| 31 |      | a        | 315.45                  | 2.35486                | YES             | YES   |
| 32 |      | a        | 354.74                  | 4.40350                | YES             | YES   |
| 33 |      | a        | 399.79                  | 0.34017                | YES             | YES   |
| 34 |      | a        | 401.89                  | 0.37964                | YES             | YES   |
| 35 |      | a        | 404.00                  | 0.99737                | YES             | YES   |
| 36 |      | a        | 410.72                  | 1.43291                | YES             | YES   |
| 37 |      | a        | 432.02                  | 13.66021               | YES             | YES   |
| 38 |      | a        | 444.42                  | 0.94919                | YES             | YES   |
| 39 |      | a        | 449.20                  | 0.88613                | YES             | YES   |
| 40 |      | a        | 469.99                  | 3.80862                | YES             | YES   |
| 41 |      | a        | 476.01                  | 1.14658                | YES             | YES   |
| 42 |      | a        | 490.75                  | 5.89549                | YES             | YES   |
| 43 |      | a        | 511.19                  | 3.28314                | YES             | YES   |
| 44 |      | a        | 523.69                  | 2.96840                | YES             | YES   |
| 45 |      | a        | 532.69                  | 13.34996               | YES             | YES   |
| 46 |      | a        | 537.60                  | 6.45739                | YES             | YES   |
| 47 |      | a        | 571.53                  | 10.37027               | YES             | YES   |
| 48 |      | a        | 595.22                  | 21.30454               | YES             | YES   |
| 49 |      | a        | 600.42                  | 1.13653                | YES             | YES   |
| 50 |      | a        | 609.38                  | 0.96738                | YES             | YES   |

## 8ia

SCF Energy (au) BP86/SV(P) -2183.167100726  
 SCF Energy (au) PBE0/def2-TZVPP -2182.760093970  
 SCF Energy (au) PBE0/def2-TZVPP -2182.7673435546 (Toluene Correction)  
 Zero Point Energy (au) 0.262048  
 Chemical Potential (kJ mol<sup>-1</sup>) 552.88  
 Dispersion Correction (au) PBE0/def2-TZVPP -0.05528328

xyz coordinates  
 37

|    |            |            |            |
|----|------------|------------|------------|
| C  | 0.5519872  | -2.6912867 | -1.2913389 |
| C  | 0.2840276  | -0.7130500 | -2.8426551 |
| C  | -0.3152585 | 0.3674579  | -0.0427651 |
| C  | 2.6292711  | -1.3094929 | -1.9255555 |
| C  | -1.1180588 | -1.5613016 | 1.0385935  |
| C  | -1.8861600 | -2.6710730 | 1.4213656  |
| C  | -0.5344483 | -2.8386193 | 3.4524914  |
| C  | 0.2436599  | -1.7263580 | 3.0576751  |
| C  | -0.0589658 | -1.0903227 | 1.8545506  |
| C  | 0.6506036  | 0.0699627  | 1.1437708  |
| C  | 1.0179321  | 1.2176860  | 2.0832109  |
| Mn | 1.0064560  | -0.9825830 | -1.2152724 |
| O  | 1.7826055  | -0.4273318 | 0.4228709  |
| O  | 0.2895606  | -3.8286872 | -1.2814776 |
| O  | -0.1846590 | -0.4983389 | -3.8894827 |
| C  | -1.1895038 | -0.7156615 | -0.1640049 |
| O  | 3.6722692  | -1.5186156 | -2.3927036 |
| C  | -1.5874721 | -3.3030468 | 2.6447767  |
| H  | -1.9587835 | -0.8286218 | -0.9438598 |
| C  | -0.2589714 | 1.5834644  | -0.8799974 |
| C  | -0.2088766 | 3.9319931  | -2.4783775 |
| C  | 0.9676993  | 3.4679743  | -1.8653119 |
| C  | 0.9489654  | 2.3093202  | -1.0758683 |
| C  | -1.4363562 | 2.0636611  | -1.5112907 |
| C  | -1.4104639 | 3.2233530  | -2.2967212 |
| H  | -0.1902141 | 4.8431914  | -3.0984616 |
| H  | 1.9172306  | 4.0091726  | -2.0092557 |
| H  | 1.8825905  | 1.9313140  | -0.6341402 |
| H  | -2.3891518 | 1.5325110  | -1.3564038 |
| H  | -2.3404965 | 3.5823853  | -2.7675948 |
| H  | 1.0743472  | -1.3783058 | 3.6934000  |
| H  | -0.3103288 | -3.3497958 | 4.4034055  |
| H  | -2.1830567 | -4.1722517 | 2.9692037  |
| H  | -2.7093477 | -3.0381332 | 0.7864306  |
| H  | 1.4649868  | 2.0723840  | 1.5358923  |
| H  | 1.7650006  | 0.8569529  | 2.8231957  |
| H  | 0.1213801  | 1.5800935  | 2.6317052  |

\$vibrational spectrum

| # | mode | symmetry | wave number<br>cm** (-1) | IR intensity<br>km/mol | selection rules |       |
|---|------|----------|--------------------------|------------------------|-----------------|-------|
| # |      |          |                          |                        | IR              | RAMAN |
|   | 1    |          | 0.00                     | 0.00000                | -               | -     |
|   | 2    |          | 0.00                     | 0.00000                | -               | -     |
|   | 3    |          | 0.00                     | 0.00000                | -               | -     |
|   | 4    |          | 0.00                     | 0.00000                | -               | -     |
|   | 5    |          | 0.00                     | 0.00000                | -               | -     |
|   | 6    |          | 0.00                     | 0.00000                | -               | -     |
|   | 7    | a        | 20.11                    | 0.20072                | YES             | YES   |
|   | 8    | a        | 43.70                    | 0.18262                | YES             | YES   |
|   | 9    | a        | 55.91                    | 0.39403                | YES             | YES   |
|   | 10   | a        | 72.01                    | 0.02060                | YES             | YES   |

|    |   |        |          |     |     |
|----|---|--------|----------|-----|-----|
| 11 | a | 78.66  | 0.27668  | YES | YES |
| 12 | a | 86.20  | 0.40743  | YES | YES |
| 13 | a | 91.56  | 0.15210  | YES | YES |
| 14 | a | 99.13  | 0.43175  | YES | YES |
| 15 | a | 106.62 | 0.83380  | YES | YES |
| 16 | a | 108.75 | 0.38617  | YES | YES |
| 17 | a | 124.81 | 0.80891  | YES | YES |
| 18 | a | 173.83 | 1.02082  | YES | YES |
| 19 | a | 187.33 | 0.44146  | YES | YES |
| 20 | a | 208.12 | 0.11055  | YES | YES |
| 21 | a | 236.87 | 0.28880  | YES | YES |
| 22 | a | 250.26 | 0.29553  | YES | YES |
| 23 | a | 262.29 | 2.69722  | YES | YES |
| 24 | a | 276.55 | 0.22091  | YES | YES |
| 25 | a | 311.10 | 7.63204  | YES | YES |
| 26 | a | 335.74 | 4.50892  | YES | YES |
| 27 | a | 358.90 | 3.92761  | YES | YES |
| 28 | a | 409.49 | 0.48452  | YES | YES |
| 29 | a | 415.74 | 1.38512  | YES | YES |
| 30 | a | 441.65 | 6.35928  | YES | YES |
| 31 | a | 449.05 | 0.51048  | YES | YES |
| 32 | a | 464.02 | 4.18320  | YES | YES |
| 33 | a | 477.83 | 10.23579 | YES | YES |
| 34 | a | 484.00 | 5.78995  | YES | YES |
| 35 | a | 503.35 | 9.08164  | YES | YES |
| 36 | a | 521.28 | 8.94887  | YES | YES |
| 37 | a | 532.86 | 1.55631  | YES | YES |
| 38 | a | 556.82 | 8.49744  | YES | YES |
| 39 | a | 560.73 | 5.82532  | YES | YES |
| 40 | a | 590.10 | 10.15338 | YES | YES |
| 41 | a | 599.96 | 27.22976 | YES | YES |
| 42 | a | 607.28 | 14.07331 | YES | YES |
| 43 | a | 610.71 | 3.00172  | YES | YES |
| 44 | a | 638.06 | 18.14658 | YES | YES |
| 45 | a | 648.93 | 20.96493 | YES | YES |
| 46 | a | 670.45 | 18.26347 | YES | YES |
| 47 | a | 692.11 | 31.38006 | YES | YES |
| 48 | a | 697.96 | 21.35305 | YES | YES |
| 49 | a | 704.56 | 12.89033 | YES | YES |
| 50 | a | 746.65 | 33.45622 | YES | YES |

**8ja**

|                                            |                                       |
|--------------------------------------------|---------------------------------------|
| SCF Energy (au) BP86/SV(P)                 | -2452.112960024                       |
| SCF Energy (au) PBE0/def2-TZVPP            | -2451.661992594                       |
| SCF Energy (au) PBE0/def2-TZVPP            | -2451.6706401152 (Toluene Correction) |
| Zero Point Energy (au)                     | 0.3460163                             |
| Chemical Potential (kJ mol <sup>-1</sup> ) | 747.33                                |
| Dispersion Correction (au) PBE0/def2-TZVPP | -0.07305111                           |

xyz coordinates

48

|    |            |            |            |
|----|------------|------------|------------|
| C  | 0.8108323  | -2.5903869 | -1.8551545 |
| C  | 0.3540829  | -0.6479745 | -3.4094316 |
| C  | -0.0826625 | 0.4169862  | -0.5404790 |
| C  | 2.7762166  | -1.1195163 | -2.6223677 |
| C  | -0.8478166 | -1.4866598 | 0.6328914  |
| C  | -1.7366531 | -2.6171487 | 0.9565024  |
| C  | 0.2389347  | -1.0390112 | 1.3320947  |
| C  | 0.9318723  | 0.0981200  | 0.5907915  |
| C  | 1.3462114  | 1.2268378  | 1.5268983  |
| Mn | 1.1834611  | -0.8643311 | -1.8247111 |
| O  | 2.0238398  | -0.4190367 | -0.1702391 |
| O  | 0.6133847  | -3.7407970 | -1.8329725 |
| O  | -0.1845942 | -0.4812006 | -4.4314630 |
| C  | -0.9733815 | -0.6514769 | -0.5916826 |
| O  | 3.8052897  | -1.2837979 | -3.1362321 |
| H  | -1.7905066 | -0.7560741 | -1.3207365 |
| C  | -0.0049395 | 1.6024817  | -1.4098848 |
| C  | 0.1173724  | 3.9102760  | -3.0585552 |
| C  | 1.2408968  | 3.5139527  | -2.3143373 |
| C  | 1.1863709  | 2.3767047  | -1.4952047 |
| C  | -1.1333642 | 2.0200555  | -2.1687061 |
| C  | -1.0715674 | 3.1590736  | -2.9776495 |
| H  | 0.1631612  | 4.8064150  | -3.6988284 |
| H  | 2.1747461  | 4.0968736  | -2.3679992 |
| H  | 2.0717122  | 2.0692665  | -0.9211398 |
| H  | -2.0760080 | 1.4540942  | -2.0993076 |
| H  | -1.9618472 | 3.4706015  | -3.5482432 |
| C  | -3.4330047 | -4.8051935 | 1.5919634  |
| C  | -2.6637013 | -4.1884179 | 2.5962573  |
| C  | -1.8294188 | -3.1077696 | 2.2832143  |
| C  | -2.5224466 | -3.2442275 | -0.0407170 |
| C  | -3.3575429 | -4.3279362 | 0.2732583  |
| H  | -4.0918794 | -5.6539004 | 1.8389797  |
| H  | -2.7208029 | -4.5500213 | 3.6363777  |
| H  | -1.2500667 | -2.6188642 | 3.0831149  |
| H  | -2.4615598 | -2.9022017 | -1.0859113 |
| H  | -3.9514708 | -4.8057075 | -0.5233034 |
| C  | 2.1262996  | 3.2434620  | 3.3417805  |
| C  | 3.0871860  | 2.3796812  | 2.7891985  |
| C  | 2.7002511  | 1.3750198  | 1.8854352  |
| C  | 0.3845893  | 2.0930841  | 2.0859939  |
| C  | 0.7729370  | 3.0974656  | 2.9870120  |
| H  | 2.4308740  | 4.0329286  | 4.0488730  |
| H  | 4.1503046  | 2.4888908  | 3.0619363  |
| H  | 3.4429536  | 0.6954052  | 1.4389028  |
| H  | -0.6785673 | 1.9830107  | 1.8118488  |
| H  | 0.0129662  | 3.7725691  | 3.4145818  |
| H  | 0.6770557  | -1.4816048 | 2.2373501  |

\$vibrational spectrum

| #  | mode | symmetry | wave number<br>cm**(-1) | IR intensity<br>km/mol | selection rules |       |
|----|------|----------|-------------------------|------------------------|-----------------|-------|
| #  |      |          |                         |                        | IR              | RAMAN |
| 1  |      |          | 0.00                    | 0.00000                | -               | -     |
| 2  |      |          | 0.00                    | 0.00000                | -               | -     |
| 3  |      |          | 0.00                    | 0.00000                | -               | -     |
| 4  |      |          | 0.00                    | 0.00000                | -               | -     |
| 5  |      |          | 0.00                    | 0.00000                | -               | -     |
| 6  |      |          | 0.00                    | 0.00000                | -               | -     |
| 7  |      | a        | 9.39                    | 0.51363                | YES             | YES   |
| 8  |      | a        | 32.12                   | 0.20469                | YES             | YES   |
| 9  |      | a        | 34.81                   | 0.10117                | YES             | YES   |
| 10 |      | a        | 37.44                   | 0.46825                | YES             | YES   |
| 11 |      | a        | 40.24                   | 0.01493                | YES             | YES   |
| 12 |      | a        | 45.91                   | 0.16691                | YES             | YES   |
| 13 |      | a        | 51.66                   | 0.12131                | YES             | YES   |
| 14 |      | a        | 67.30                   | 0.24290                | YES             | YES   |
| 15 |      | a        | 73.61                   | 0.08827                | YES             | YES   |
| 16 |      | a        | 82.74                   | 0.23275                | YES             | YES   |
| 17 |      | a        | 90.31                   | 0.58714                | YES             | YES   |
| 18 |      | a        | 96.41                   | 0.25560                | YES             | YES   |
| 19 |      | a        | 106.21                  | 1.03310                | YES             | YES   |
| 20 |      | a        | 122.44                  | 0.07124                | YES             | YES   |
| 21 |      | a        | 135.04                  | 0.29045                | YES             | YES   |
| 22 |      | a        | 159.90                  | 0.70650                | YES             | YES   |
| 23 |      | a        | 171.85                  | 2.70924                | YES             | YES   |
| 24 |      | a        | 202.85                  | 1.28940                | YES             | YES   |
| 25 |      | a        | 216.36                  | 0.94684                | YES             | YES   |
| 26 |      | a        | 226.97                  | 1.21257                | YES             | YES   |
| 27 |      | a        | 240.13                  | 3.80695                | YES             | YES   |
| 28 |      | a        | 258.11                  | 1.61148                | YES             | YES   |
| 29 |      | a        | 265.91                  | 0.05346                | YES             | YES   |
| 30 |      | a        | 335.01                  | 4.01898                | YES             | YES   |
| 31 |      | a        | 383.95                  | 0.80238                | YES             | YES   |
| 32 |      | a        | 401.10                  | 0.41059                | YES             | YES   |
| 33 |      | a        | 401.14                  | 0.52167                | YES             | YES   |
| 34 |      | a        | 404.62                  | 0.48174                | YES             | YES   |
| 35 |      | a        | 412.48                  | 2.77429                | YES             | YES   |
| 36 |      | a        | 420.42                  | 1.67771                | YES             | YES   |
| 37 |      | a        | 443.53                  | 7.46887                | YES             | YES   |
| 38 |      | a        | 450.80                  | 1.71787                | YES             | YES   |
| 39 |      | a        | 466.08                  | 11.60292               | YES             | YES   |
| 40 |      | a        | 472.43                  | 5.63197                | YES             | YES   |
| 41 |      | a        | 480.54                  | 4.86212                | YES             | YES   |
| 42 |      | a        | 497.71                  | 15.38443               | YES             | YES   |
| 43 |      | a        | 512.43                  | 20.50597               | YES             | YES   |
| 44 |      | a        | 531.11                  | 2.32273                | YES             | YES   |
| 45 |      | a        | 542.35                  | 12.22692               | YES             | YES   |
| 46 |      | a        | 563.25                  | 9.03231                | YES             | YES   |
| 47 |      | a        | 599.68                  | 11.71928               | YES             | YES   |
| 48 |      | a        | 604.55                  | 11.06808               | YES             | YES   |
| 49 |      | a        | 609.38                  | 3.49552                | YES             | YES   |
| 50 |      | a        | 610.81                  | 2.20605                | YES             | YES   |

9ia

SCF Energy (au) BP86/SV(P) -2183.138380453  
 SCF Energy (au) PBE0/def2-TZVPP -2182.724742562  
 SCF Energy (au) PBE0/def2-TZVPP -2182.7310254792 (Toluene Correction)  
 Zero Point Energy (au) 0.2609739  
 Chemical Potential (kJ mol<sup>-1</sup>) 548.90  
 Dispersion Correction (au) PBE0/def2-TZVPP -0.05007606

xyz coordinates  
 37

|    |            |            |            |
|----|------------|------------|------------|
| C  | -0.4555222 | -1.0272451 | 3.0134137  |
| C  | -2.2322748 | 0.4111283  | 1.9710883  |
| C  | 0.0765045  | 0.6592913  | 0.2153566  |
| C  | -2.0328828 | -2.2131014 | 1.3040033  |
| C  | 0.6943673  | -1.7017693 | 0.2059772  |
| C  | 1.4316334  | -2.8323304 | 0.7623819  |
| C  | 1.3005899  | -4.0080826 | -1.3831930 |
| C  | 0.5988639  | -2.9877527 | -1.9733225 |
| C  | 0.2029760  | -1.8214566 | -1.2085885 |
| C  | -0.5734114 | -0.7912101 | -1.6547933 |
| C  | -1.1030889 | -0.4177771 | -2.9922619 |
| Mn | -0.9860359 | -0.7326150 | 1.3497814  |
| O  | -0.9747193 | 0.1184265  | -0.6077278 |
| O  | -0.0663219 | -1.2180463 | 4.0996646  |
| O  | -3.0346241 | 1.1523496  | 2.3770901  |
| C  | 0.9524247  | -0.3565723 | 0.6718398  |
| O  | -2.7078744 | -3.1600726 | 1.2635249  |
| C  | 1.7089756  | -3.9403243 | 0.0073344  |
| H  | 1.7758198  | -0.1248679 | 1.3632294  |
| C  | 0.1894817  | 2.1233550  | 0.2802081  |
| C  | 0.3726487  | 4.9465356  | 0.4286199  |
| C  | -0.6867555 | 4.3411891  | -0.2687163 |
| C  | -0.7816514 | 2.9441210  | -0.3418260 |
| C  | 1.2592495  | 2.7430561  | 0.9719089  |
| C  | 1.3436830  | 4.1395897  | 1.0490001  |
| H  | 0.4435155  | 6.0448941  | 0.4884125  |
| H  | -1.4530753 | 4.9637220  | -0.7593994 |
| H  | -1.6178905 | 2.4722011  | -0.8791882 |
| H  | 2.0349144  | 2.1291004  | 1.4564324  |
| H  | 2.1816553  | 4.6031950  | 1.5951619  |
| H  | 0.2850503  | -3.0663822 | -3.0270335 |
| H  | 1.5562552  | -4.9047089 | -1.9718040 |
| H  | 2.2602328  | -4.7868424 | 0.4477199  |
| H  | 1.7740923  | -2.7639756 | 1.8084347  |
| H  | -0.8191214 | -1.1743746 | -3.7523658 |
| H  | -0.7027317 | 0.5686405  | -3.3272306 |
| H  | -2.2149523 | -0.3312879 | -2.9831333 |

\$vibrational spectrum

| # | mode | symmetry | wave number<br>cm** (-1) | IR intensity<br>km/mol | selection rules |       |
|---|------|----------|--------------------------|------------------------|-----------------|-------|
| # |      |          |                          |                        | IR              | RAMAN |
|   | 1    |          | 0.00                     | 0.00000                | -               | -     |
|   | 2    |          | 0.00                     | 0.00000                | -               | -     |
|   | 3    |          | 0.00                     | 0.00000                | -               | -     |
|   | 4    |          | 0.00                     | 0.00000                | -               | -     |
|   | 5    |          | 0.00                     | 0.00000                | -               | -     |
|   | 6    |          | 0.00                     | 0.00000                | -               | -     |
|   | 7    | a        | 32.09                    | 0.16433                | YES             | YES   |
|   | 8    | a        | 41.04                    | 0.43457                | YES             | YES   |
|   | 9    | a        | 43.30                    | 0.08549                | YES             | YES   |
|   | 10   | a        | 61.32                    | 0.14316                | YES             | YES   |



|    |   |        |          |     |     |
|----|---|--------|----------|-----|-----|
| 11 | a | 70.63  | 0.24433  | YES | YES |
| 12 | a | 80.44  | 0.10310  | YES | YES |
| 13 | a | 88.72  | 0.56643  | YES | YES |
| 14 | a | 91.28  | 0.09064  | YES | YES |
| 15 | a | 101.03 | 0.17071  | YES | YES |
| 16 | a | 122.69 | 0.88529  | YES | YES |
| 17 | a | 137.08 | 0.61744  | YES | YES |
| 18 | a | 154.22 | 0.07845  | YES | YES |
| 19 | a | 160.24 | 2.97304  | YES | YES |
| 20 | a | 194.72 | 3.09354  | YES | YES |
| 21 | a | 210.73 | 1.39781  | YES | YES |
| 22 | a | 225.33 | 0.10436  | YES | YES |
| 23 | a | 264.83 | 0.46515  | YES | YES |
| 24 | a | 279.37 | 0.16220  | YES | YES |
| 25 | a | 328.31 | 2.31572  | YES | YES |
| 26 | a | 395.22 | 2.39126  | YES | YES |
| 27 | a | 401.33 | 1.58970  | YES | YES |
| 28 | a | 416.82 | 3.66140  | YES | YES |
| 29 | a | 423.99 | 7.52465  | YES | YES |
| 30 | a | 435.17 | 1.33824  | YES | YES |
| 31 | a | 461.94 | 5.83288  | YES | YES |
| 32 | a | 464.69 | 8.61675  | YES | YES |
| 33 | a | 473.03 | 2.00337  | YES | YES |
| 34 | a | 483.39 | 4.12031  | YES | YES |
| 35 | a | 485.54 | 1.74401  | YES | YES |
| 36 | a | 499.73 | 10.17819 | YES | YES |
| 37 | a | 505.07 | 2.18928  | YES | YES |
| 38 | a | 525.63 | 10.68491 | YES | YES |
| 39 | a | 528.37 | 6.68453  | YES | YES |
| 40 | a | 539.64 | 8.83679  | YES | YES |
| 41 | a | 569.83 | 17.33705 | YES | YES |
| 42 | a | 606.92 | 22.91671 | YES | YES |
| 43 | a | 609.38 | 19.50509 | YES | YES |
| 44 | a | 615.44 | 28.65066 | YES | YES |
| 45 | a | 639.94 | 47.13741 | YES | YES |
| 46 | a | 648.67 | 22.80887 | YES | YES |
| 47 | a | 677.37 | 47.26649 | YES | YES |
| 48 | a | 690.85 | 40.63817 | YES | YES |
| 49 | a | 700.88 | 5.60458  | YES | YES |
| 50 | a | 705.66 | 7.87861  | YES | YES |

**9ja**

|                                            |                                       |
|--------------------------------------------|---------------------------------------|
| SCF Energy (au) BP86/SV(P)                 | -2452.123348709                       |
| SCF Energy (au) PBE0/def2-TZVPP            | -2451.669527954                       |
| SCF Energy (au) PBE0/def2-TZVPP            | -2451.6778817812 (Toluene Correction) |
| Zero Point Energy (au)                     | 0.3465202                             |
| Chemical Potential (kJ mol <sup>-1</sup> ) | 748.52                                |
| Dispersion Correction (au) PBE0/def2-TZVPP | -0.06711919                           |

xyz coordinates

48

|    |            |            |            |
|----|------------|------------|------------|
| C  | 2.3481734  | 2.2431881  | 1.1948046  |
| C  | 0.1669204  | 2.3188157  | 2.4292183  |
| C  | -0.4497452 | 1.1219581  | -0.1618083 |
| C  | 1.7887959  | 0.1560994  | 2.6481949  |
| C  | 1.5063152  | -0.3478334 | -0.2672712 |
| C  | 2.9328444  | -0.6229345 | -0.5999385 |
| C  | 0.5954253  | -1.4898840 | -0.0218430 |
| C  | -0.6543657 | -1.2326713 | 0.4334046  |
| C  | -1.8283792 | -2.0885233 | 0.5937571  |
| Mn | 0.9803039  | 1.1277700  | 1.3506333  |
| O  | -0.8371988 | 0.1422389  | 0.8244142  |
| O  | 3.2417433  | 2.9837327  | 1.0599128  |
| O  | -0.3559810 | 3.0919240  | 3.1280260  |
| C  | 0.8256757  | 0.8453429  | -0.7168583 |
| O  | 2.3032906  | -0.4872383 | 3.4703845  |
| H  | 1.2711844  | 1.5624460  | -1.4211007 |
| C  | -1.4756507 | 2.0835584  | -0.5975933 |
| C  | -4.0855982 | -3.7748885 | 0.9452271  |
| C  | -2.9467578 | -4.2450724 | 0.2634206  |
| C  | -1.8353585 | -3.4137417 | 0.0830389  |
| C  | -2.9808622 | -1.6281341 | 1.2788312  |
| C  | -4.0956897 | -2.4630130 | 1.4475238  |
| H  | -4.9620109 | -4.4296990 | 1.0795436  |
| H  | -2.9293074 | -5.2697910 | -0.1430840 |
| H  | -0.9636572 | -3.7922900 | -0.4742328 |
| H  | -2.9923089 | -0.6067439 | 1.6857237  |
| H  | -4.9814458 | -2.0831672 | 1.9829698  |
| H  | 0.8987698  | -2.5058650 | -0.3135795 |
| C  | -3.4319440 | 3.9575317  | -1.4261029 |
| C  | -2.3158747 | 3.6942575  | -2.2390909 |
| C  | -1.3504676 | 2.7605723  | -1.8347964 |
| C  | -2.6048486 | 2.3545139  | 0.2113516  |
| C  | -3.5729147 | 3.2799432  | -0.2017181 |
| H  | -4.1933155 | 4.6868346  | -1.7478189 |
| H  | -2.2010025 | 4.2109463  | -3.2061260 |
| H  | -0.4983866 | 2.5433499  | -2.4980973 |
| H  | -2.7102842 | 1.8425986  | 1.1795225  |
| H  | -4.4441656 | 3.4791372  | 0.4434947  |
| C  | 5.6523835  | -1.2186915 | -1.2127869 |
| C  | 5.0527270  | -0.0436213 | -1.6970863 |
| C  | 3.7148678  | 0.2504861  | -1.3942853 |
| C  | 3.5578032  | -1.7978579 | -0.1128142 |
| C  | 4.8955628  | -2.0926406 | -0.4142897 |
| H  | 6.7043340  | -1.4473057 | -1.4498788 |
| H  | 5.6332163  | 0.6573574  | -2.3196217 |
| H  | 3.2815708  | 1.1826469  | -1.7890620 |
| H  | 2.9934402  | -2.4831364 | 0.5401539  |
| H  | 5.3521732  | -3.0125058 | -0.0126667 |

\$vibrational spectrum

| #  | mode | symmetry | wave number<br>cm**(-1) | IR intensity<br>km/mol | selection rules |       |
|----|------|----------|-------------------------|------------------------|-----------------|-------|
| #  |      |          |                         |                        | IR              | RAMAN |
| 1  |      |          | 0.00                    | 0.00000                | -               | -     |
| 2  |      |          | 0.00                    | 0.00000                | -               | -     |
| 3  |      |          | 0.00                    | 0.00000                | -               | -     |
| 4  |      |          | 0.00                    | 0.00000                | -               | -     |
| 5  |      |          | 0.00                    | 0.00000                | -               | -     |
| 6  |      |          | 0.00                    | 0.00000                | -               | -     |
| 7  |      | a        | 10.18                   | 0.33573                | YES             | YES   |
| 8  |      | a        | 25.47                   | 0.04866                | YES             | YES   |
| 9  |      | a        | 28.98                   | 0.47989                | YES             | YES   |
| 10 |      | a        | 37.98                   | 0.33424                | YES             | YES   |
| 11 |      | a        | 40.14                   | 0.15511                | YES             | YES   |
| 12 |      | a        | 43.28                   | 0.33799                | YES             | YES   |
| 13 |      | a        | 47.51                   | 0.07398                | YES             | YES   |
| 14 |      | a        | 64.19                   | 0.02483                | YES             | YES   |
| 15 |      | a        | 65.43                   | 0.04008                | YES             | YES   |
| 16 |      | a        | 85.18                   | 0.26396                | YES             | YES   |
| 17 |      | a        | 86.74                   | 0.47070                | YES             | YES   |
| 18 |      | a        | 99.55                   | 0.10688                | YES             | YES   |
| 19 |      | a        | 112.34                  | 0.21166                | YES             | YES   |
| 20 |      | a        | 133.07                  | 0.22799                | YES             | YES   |
| 21 |      | a        | 156.64                  | 0.23988                | YES             | YES   |
| 22 |      | a        | 176.24                  | 0.31802                | YES             | YES   |
| 23 |      | a        | 178.08                  | 5.06385                | YES             | YES   |
| 24 |      | a        | 201.08                  | 1.21054                | YES             | YES   |
| 25 |      | a        | 224.13                  | 0.38223                | YES             | YES   |
| 26 |      | a        | 231.65                  | 0.53260                | YES             | YES   |
| 27 |      | a        | 253.66                  | 0.13913                | YES             | YES   |
| 28 |      | a        | 283.75                  | 0.39827                | YES             | YES   |
| 29 |      | a        | 339.79                  | 1.84763                | YES             | YES   |
| 30 |      | a        | 370.05                  | 0.66602                | YES             | YES   |
| 31 |      | a        | 397.59                  | 0.44885                | YES             | YES   |
| 32 |      | a        | 399.17                  | 1.01817                | YES             | YES   |
| 33 |      | a        | 400.76                  | 0.01344                | YES             | YES   |
| 34 |      | a        | 409.24                  | 6.36317                | YES             | YES   |
| 35 |      | a        | 419.18                  | 9.63843                | YES             | YES   |
| 36 |      | a        | 429.06                  | 3.29580                | YES             | YES   |
| 37 |      | a        | 446.88                  | 0.94191                | YES             | YES   |
| 38 |      | a        | 454.75                  | 2.00890                | YES             | YES   |
| 39 |      | a        | 471.78                  | 6.65950                | YES             | YES   |
| 40 |      | a        | 475.15                  | 4.60871                | YES             | YES   |
| 41 |      | a        | 491.20                  | 5.83447                | YES             | YES   |
| 42 |      | a        | 497.32                  | 7.85839                | YES             | YES   |
| 43 |      | a        | 505.28                  | 16.47287               | YES             | YES   |
| 44 |      | a        | 529.69                  | 11.38708               | YES             | YES   |
| 45 |      | a        | 542.19                  | 1.29025                | YES             | YES   |
| 46 |      | a        | 556.07                  | 1.17116                | YES             | YES   |
| 47 |      | a        | 577.70                  | 32.51701               | YES             | YES   |
| 48 |      | a        | 594.52                  | 11.60200               | YES             | YES   |
| 49 |      | a        | 610.95                  | 9.31423                | YES             | YES   |
| 50 |      | a        | 611.61                  | 15.19755               | YES             | YES   |

10ia

SCF Energy (au) BP86/SV(P) -2183.171667761  
 SCF Energy (au) PBE0/def2-TZVPP -2182.759271019  
 SCF Energy (au) PBE0/def2-TZVPP -2182.7662187626 (Toluene Correction)  
 Zero Point Energy (au) 0.2623685  
 Chemical Potential (kJ mol<sup>-1</sup>) 552.90  
 Dispersion Correction (au) PBE0/def2-TZVPP -0.05036288

xyz coordinates  
 37

|    |            |            |            |
|----|------------|------------|------------|
| C  | 1.7416408  | -0.3110429 | 2.6964122  |
| C  | -0.8712760 | 0.4193370  | 2.4633608  |
| C  | -0.1669048 | 0.7917484  | -0.6034849 |
| C  | -0.1250551 | -2.0260195 | 2.8690518  |
| C  | 1.2989200  | -1.1605016 | -0.1507975 |
| C  | 2.5785955  | -1.7819943 | -0.2919384 |
| C  | 1.5068238  | -3.9769796 | -0.2672980 |
| C  | 0.2492646  | -3.4050117 | -0.1216549 |
| C  | 0.1094744  | -1.9805270 | -0.0721054 |
| C  | -1.0938021 | -1.1981647 | 0.2068743  |
| Mn | 0.2702500  | -0.7301946 | 1.7199400  |
| O  | -1.2283806 | -0.0104199 | -0.6625917 |
| O  | 2.6724097  | -0.0025099 | 3.3308564  |
| O  | -1.6464613 | 1.1574311  | 2.9338273  |
| C  | 1.0636290  | 0.2867299  | -0.1509372 |
| O  | -0.3985336 | -2.8882566 | 3.6113264  |
| C  | 2.6744766  | -3.1661645 | -0.3522813 |
| H  | 1.9213850  | 0.9676776  | -0.0641243 |
| C  | -0.4078879 | 2.1686693  | -1.0679434 |
| C  | -0.9215874 | 4.8009094  | -1.9518210 |
| C  | 0.4022624  | 4.3317557  | -1.8682576 |
| C  | 0.6593036  | 3.0255458  | -1.4329481 |
| C  | -1.7371538 | 2.6507631  | -1.1584131 |
| C  | -1.9892911 | 3.9564387  | -1.5985609 |
| H  | -1.1209938 | 5.8296381  | -2.2948752 |
| H  | 1.2405463  | 4.9881441  | -2.1531103 |
| H  | 1.6979338  | 2.6616762  | -1.3974042 |
| H  | -2.5646823 | 1.9881558  | -0.8651030 |
| H  | -3.0271132 | 4.3225561  | -1.6596933 |
| C  | -2.4511310 | -1.8280817 | 0.3522992  |
| H  | 3.4786001  | -1.1497834 | -0.3651810 |
| H  | 3.6626138  | -3.6431160 | -0.4562814 |
| H  | 1.6052489  | -5.0741229 | -0.3131083 |
| H  | -0.6497154 | -4.0382788 | -0.0630405 |
| H  | -3.1796535 | -1.0938172 | 0.7576642  |
| H  | -2.4062060 | -2.6792928 | 1.0632910  |
| H  | -2.8475492 | -2.2028965 | -0.6219486 |

\$vibrational spectrum

| # | mode | symmetry | wave number | IR intensity | selection rules |       |
|---|------|----------|-------------|--------------|-----------------|-------|
| # |      |          | cm** (-1)   | km/mol       | IR              | RAMAN |
|   | 1    |          | 0.00        | 0.00000      | -               | -     |
|   | 2    |          | 0.00        | 0.00000      | -               | -     |
|   | 3    |          | 0.00        | 0.00000      | -               | -     |
|   | 4    |          | 0.00        | 0.00000      | -               | -     |
|   | 5    |          | 0.00        | 0.00000      | -               | -     |
|   | 6    |          | 0.00        | 0.00000      | -               | -     |
|   | 7    | a        | 22.93       | 2.04808      | YES             | YES   |
|   | 8    | a        | 35.63       | 0.05486      | YES             | YES   |
|   | 9    | a        | 37.64       | 0.06628      | YES             | YES   |
|   | 10   | a        | 67.71       | 1.08211      | YES             | YES   |

|    |   |        |          |     |     |
|----|---|--------|----------|-----|-----|
| 11 | a | 79.74  | 0.19435  | YES | YES |
| 12 | a | 83.10  | 0.33410  | YES | YES |
| 13 | a | 93.34  | 0.53032  | YES | YES |
| 14 | a | 98.58  | 0.34548  | YES | YES |
| 15 | a | 106.97 | 0.20771  | YES | YES |
| 16 | a | 132.40 | 2.84990  | YES | YES |
| 17 | a | 140.23 | 0.70162  | YES | YES |
| 18 | a | 150.70 | 0.84470  | YES | YES |
| 19 | a | 181.14 | 0.41538  | YES | YES |
| 20 | a | 207.09 | 0.50058  | YES | YES |
| 21 | a | 231.63 | 5.33756  | YES | YES |
| 22 | a | 262.88 | 0.13112  | YES | YES |
| 23 | a | 285.43 | 8.88123  | YES | YES |
| 24 | a | 299.28 | 0.21116  | YES | YES |
| 25 | a | 318.43 | 1.84098  | YES | YES |
| 26 | a | 327.54 | 4.75623  | YES | YES |
| 27 | a | 399.85 | 0.04054  | YES | YES |
| 28 | a | 416.07 | 4.37544  | YES | YES |
| 29 | a | 430.70 | 0.97133  | YES | YES |
| 30 | a | 433.74 | 7.94172  | YES | YES |
| 31 | a | 468.24 | 4.45534  | YES | YES |
| 32 | a | 469.79 | 6.79562  | YES | YES |
| 33 | a | 474.59 | 0.46909  | YES | YES |
| 34 | a | 489.99 | 3.20937  | YES | YES |
| 35 | a | 492.12 | 0.24457  | YES | YES |
| 36 | a | 506.72 | 8.96440  | YES | YES |
| 37 | a | 515.59 | 12.62066 | YES | YES |
| 38 | a | 527.61 | 7.60533  | YES | YES |
| 39 | a | 531.09 | 6.41458  | YES | YES |
| 40 | a | 559.16 | 2.49141  | YES | YES |
| 41 | a | 589.33 | 2.07303  | YES | YES |
| 42 | a | 607.23 | 29.54767 | YES | YES |
| 43 | a | 610.28 | 3.70786  | YES | YES |
| 44 | a | 639.55 | 48.54657 | YES | YES |
| 45 | a | 656.40 | 12.12776 | YES | YES |
| 46 | a | 660.05 | 24.40755 | YES | YES |
| 47 | a | 677.96 | 60.85678 | YES | YES |
| 48 | a | 686.84 | 36.23974 | YES | YES |
| 49 | a | 713.28 | 1.40244  | YES | YES |
| 50 | a | 728.90 | 69.19622 | YES | YES |

**10ja**

|                                            |                                       |
|--------------------------------------------|---------------------------------------|
| SCF Energy (au) BP86/SV(P)                 | -2452.145470468                       |
| SCF Energy (au) PBE0/def2-TZVPP            | -2451.692028912                       |
| SCF Energy (au) PBE0/def2-TZVPP            | -2451.7000699796 (Toluene Correction) |
| Zero Point Energy (au)                     | 0.3474597                             |
| Chemical Potential (kJ mol <sup>-1</sup> ) | 755.51                                |
| Dispersion Correction (au) PBE0/def2-TZVPP | -0.06824413                           |

xyz coordinates

48

|    |            |            |            |
|----|------------|------------|------------|
| C  | 1.6780743  | 1.2309898  | 1.9923960  |
| C  | -0.9898958 | 1.2615352  | 1.9040674  |
| C  | -0.0394979 | 1.1257232  | -0.7683092 |
| C  | 0.4310896  | -0.8285674 | 2.7266545  |
| C  | 1.3244149  | -0.8822765 | -0.2962105 |
| C  | 0.0619891  | -1.4838559 | 0.0472746  |
| C  | -1.1331050 | -0.7307102 | -0.1021554 |
| Mn | 0.3600532  | 0.2340567  | 1.2849380  |
| O  | -1.1312380 | 0.2895431  | -1.0807702 |
| O  | 2.5330402  | 1.8902683  | 2.4346122  |
| O  | -1.8603645 | 1.9235846  | 2.3016812  |
| C  | 1.2333480  | 0.5092709  | -0.6593866 |
| O  | 0.4648208  | -1.5390475 | 3.6535217  |
| H  | 2.1524689  | 1.1048530  | -0.7607071 |
| C  | -0.2579604 | 2.5575621  | -1.0564700 |
| C  | -0.6966560 | 5.2882393  | -1.6795272 |
| C  | 0.5287824  | 4.8748054  | -1.1231468 |
| C  | 0.7465173  | 3.5273047  | -0.8115288 |
| C  | -1.4886779 | 2.9853354  | -1.6077039 |
| C  | -1.7022905 | 4.3375931  | -1.9170142 |
| H  | -0.8671356 | 6.3509757  | -1.9180002 |
| H  | 1.3210578  | 5.6136587  | -0.9187918 |
| H  | 1.7011818  | 3.2340919  | -0.3462086 |
| H  | -2.2783306 | 2.2436561  | -1.7939022 |
| H  | -2.6684209 | 4.6501937  | -2.3464741 |
| C  | -2.4754089 | -1.2349964 | 0.2527769  |
| C  | 2.6058982  | -1.6329494 | -0.3207534 |
| H  | 0.0287655  | -2.4999361 | 0.4664834  |
| C  | -5.0553649 | -2.2494116 | 0.8431010  |
| C  | -3.9315986 | -2.7098572 | 1.5552067  |
| C  | -2.6564172 | -2.2072815 | 1.2680186  |
| C  | -3.6124354 | -0.7720371 | -0.4502200 |
| C  | -4.8886191 | -1.2782083 | -0.1573178 |
| H  | -6.0586393 | -2.6424943 | 1.0759038  |
| H  | -4.0521713 | -3.4610638 | 2.3530786  |
| H  | -1.7964039 | -2.5563690 | 1.8618409  |
| H  | -3.4834345 | -0.0170514 | -1.2389274 |
| H  | -5.7620081 | -0.9074773 | -0.7189706 |
| C  | 5.0466716  | -3.0764760 | -0.4370671 |
| C  | 4.8041327  | -2.0249083 | -1.3355181 |
| C  | 3.5947439  | -1.3125070 | -1.2801693 |
| C  | 2.8643005  | -2.6954262 | 0.5781829  |
| C  | 4.0694764  | -3.4087702 | 0.5196244  |
| H  | 5.9948251  | -3.6371283 | -0.4799934 |
| H  | 5.5581945  | -1.7596333 | -2.0948183 |
| H  | 3.4034500  | -0.5111931 | -2.0121849 |
| H  | 2.1258729  | -2.9477113 | 1.3563622  |
| H  | 4.2529047  | -4.2258964 | 1.2365219  |

\$vibrational spectrum

| #  | mode | symmetry | wave number<br>cm**(-1) | IR intensity<br>km/mol | selection rules |       |
|----|------|----------|-------------------------|------------------------|-----------------|-------|
| #  |      |          |                         |                        | IR              | RAMAN |
| 1  |      |          | 0.00                    | 0.00000                | -               | -     |
| 2  |      |          | 0.00                    | 0.00000                | -               | -     |
| 3  |      |          | 0.00                    | 0.00000                | -               | -     |
| 4  |      |          | 0.00                    | 0.00000                | -               | -     |
| 5  |      |          | 0.00                    | 0.00000                | -               | -     |
| 6  |      |          | 0.00                    | 0.00000                | -               | -     |
| 7  |      | a        | 23.29                   | 0.10653                | YES             | YES   |
| 8  |      | a        | 35.24                   | 0.53647                | YES             | YES   |
| 9  |      | a        | 38.30                   | 0.24444                | YES             | YES   |
| 10 |      | a        | 41.19                   | 0.96698                | YES             | YES   |
| 11 |      | a        | 44.55                   | 0.52232                | YES             | YES   |
| 12 |      | a        | 48.02                   | 0.54913                | YES             | YES   |
| 13 |      | a        | 49.84                   | 0.29528                | YES             | YES   |
| 14 |      | a        | 59.13                   | 0.39726                | YES             | YES   |
| 15 |      | a        | 66.22                   | 0.40964                | YES             | YES   |
| 16 |      | a        | 86.93                   | 0.62262                | YES             | YES   |
| 17 |      | a        | 89.10                   | 0.71655                | YES             | YES   |
| 18 |      | a        | 103.42                  | 0.07471                | YES             | YES   |
| 19 |      | a        | 126.51                  | 0.15680                | YES             | YES   |
| 20 |      | a        | 130.66                  | 0.25646                | YES             | YES   |
| 21 |      | a        | 147.29                  | 7.98522                | YES             | YES   |
| 22 |      | a        | 172.29                  | 10.05456               | YES             | YES   |
| 23 |      | a        | 180.03                  | 7.32537                | YES             | YES   |
| 24 |      | a        | 210.81                  | 4.81705                | YES             | YES   |
| 25 |      | a        | 214.90                  | 2.33947                | YES             | YES   |
| 26 |      | a        | 245.05                  | 2.54091                | YES             | YES   |
| 27 |      | a        | 256.36                  | 1.31831                | YES             | YES   |
| 28 |      | a        | 296.20                  | 2.60722                | YES             | YES   |
| 29 |      | a        | 343.61                  | 21.91165               | YES             | YES   |
| 30 |      | a        | 369.80                  | 7.55395                | YES             | YES   |
| 31 |      | a        | 381.75                  | 7.18937                | YES             | YES   |
| 32 |      | a        | 399.35                  | 0.30002                | YES             | YES   |
| 33 |      | a        | 401.85                  | 0.56329                | YES             | YES   |
| 34 |      | a        | 402.76                  | 0.87591                | YES             | YES   |
| 35 |      | a        | 409.32                  | 7.61748                | YES             | YES   |
| 36 |      | a        | 428.58                  | 6.12174                | YES             | YES   |
| 37 |      | a        | 443.00                  | 0.49891                | YES             | YES   |
| 38 |      | a        | 466.45                  | 8.99863                | YES             | YES   |
| 39 |      | a        | 473.38                  | 2.05015                | YES             | YES   |
| 40 |      | a        | 486.00                  | 0.75574                | YES             | YES   |
| 41 |      | a        | 488.36                  | 1.35608                | YES             | YES   |
| 42 |      | a        | 503.69                  | 5.89648                | YES             | YES   |
| 43 |      | a        | 515.51                  | 29.07783               | YES             | YES   |
| 44 |      | a        | 522.48                  | 28.37979               | YES             | YES   |
| 45 |      | a        | 544.90                  | 4.36957                | YES             | YES   |
| 46 |      | a        | 555.70                  | 32.56046               | YES             | YES   |
| 47 |      | a        | 563.22                  | 1.88397                | YES             | YES   |
| 48 |      | a        | 594.11                  | 46.25290               | YES             | YES   |
| 49 |      | a        | 608.59                  | 1.40299                | YES             | YES   |
| 50 |      | a        | 610.70                  | 4.43086                | YES             | YES   |

**TS<sub>23aa</sub>**

SCF Energy (au) BP86/SV(P) -2427.864609133  
SCF Energy (au) PBE0/def2-TZVPP -2427.423479953  
SCF Energy (au) PBE0/def2-TZVPP -2427.4336311029 (Toluene Correction)  
Zero Point Energy (au) 0.2961349  
Chemical Potential (kJ mol<sup>-1</sup>) 626.52  
Dispersion Correction (au) PBE0/def2-TZVPP -0.06311849

xyz coordinates

43

|    |            |            |            |
|----|------------|------------|------------|
| Mn | 1.6788083  | 0.5413038  | 0.6660746  |
| C  | 2.0503776  | 0.5296482  | 2.4309562  |
| C  | 3.4045443  | 0.1742659  | 0.2830201  |
| C  | 2.0529433  | 2.3065225  | 0.5143330  |
| O  | 2.3294949  | 3.4417091  | 0.4733818  |
| O  | 4.5278610  | 0.0167896  | 0.0295371  |
| O  | 2.2814247  | 0.4988557  | 3.5712309  |
| C  | -1.0926686 | -0.2583324 | 1.3776519  |
| C  | -0.9973400 | 2.0490016  | 0.9698394  |
| C  | -2.3651450 | 2.2050745  | 1.2189961  |
| C  | -3.1234895 | 1.0695381  | 1.5546272  |
| C  | -2.4812563 | -0.1687169 | 1.6297222  |
| C  | -0.3111906 | -1.4899509 | 1.4194569  |
| C  | 1.0201526  | -1.3705871 | 0.9948310  |
| C  | 1.8629472  | -2.5728500 | 1.0052334  |
| O  | 1.2773948  | -3.7544008 | 1.5323100  |
| C  | -0.0161149 | -3.8397296 | 1.9367080  |
| C  | -0.8418725 | -2.7488364 | 1.8724334  |
| O  | 2.9976265  | -2.6790794 | 0.5829983  |
| C  | -0.3753289 | -5.2043941 | 2.4389469  |
| N  | -0.3659046 | 0.8571799  | 1.0459106  |
| C  | 0.3346785  | 1.3859714  | -2.3672480 |
| C  | 0.7595590  | 2.7269160  | -2.5583839 |
| C  | 0.2076688  | 3.5125802  | -3.5802728 |
| C  | -0.7871582 | 2.9913869  | -4.4262850 |
| C  | -1.2257909 | 1.6668207  | -4.2433593 |
| C  | -0.6763379 | 0.8725536  | -3.2295837 |
| C  | 0.8900099  | 0.5081948  | -1.3681614 |
| C  | 1.2206952  | -0.6756461 | -0.9953258 |
| H  | -0.3749161 | 2.9150525  | 0.6987359  |
| H  | -2.8212774 | 3.2044537  | 1.1470848  |
| H  | -4.2045597 | 1.1511865  | 1.7526742  |
| H  | -3.0496886 | -1.0765220 | 1.8787698  |
| H  | -1.8814572 | -2.8487494 | 2.2152355  |
| H  | 1.5379814  | 3.1497117  | -1.9072265 |
| H  | 0.5606496  | 4.5483909  | -3.7161426 |
| H  | -1.2210490 | 3.6149772  | -5.2253032 |
| H  | -2.0054478 | 1.2462192  | -4.9007374 |
| H  | -1.0214133 | -0.1641280 | -3.0867825 |
| H  | 1.6181458  | -1.6329900 | -1.3457148 |
| H  | -1.4359054 | -5.2432596 | 2.7599516  |
| H  | 0.2713780  | -5.4850809 | 3.3010068  |
| H  | -0.2090293 | -5.9710504 | 1.6488693  |

\$vibrational spectrum

| # | mode | symmetry | wave number           | IR intensity | selection rules |
|---|------|----------|-----------------------|--------------|-----------------|
| # |      |          | cm <sup>**</sup> (-1) | km/mol       | IR RAMAN        |
|   | 1    | a        | -172.74               | 0.00000      | YES YES         |
|   | 2    |          | 0.00                  | 0.00000      | - -             |
|   | 3    |          | 0.00                  | 0.00000      | - -             |
|   | 4    |          | 0.00                  | 0.00000      | - -             |
|   | 5    |          | 0.00                  | 0.00000      | - -             |



|    |   |        |          |     |     |
|----|---|--------|----------|-----|-----|
| 6  |   | 0.00   | 0.00000  | -   | -   |
| 7  |   | 0.00   | 0.00000  | -   | -   |
| 8  | a | 17.15  | 0.19902  | YES | YES |
| 9  | a | 25.26  | 0.83606  | YES | YES |
| 10 | a | 36.60  | 0.25361  | YES | YES |
| 11 | a | 50.78  | 1.18797  | YES | YES |
| 12 | a | 68.90  | 0.33269  | YES | YES |
| 13 | a | 75.37  | 0.27528  | YES | YES |
| 14 | a | 83.79  | 0.33993  | YES | YES |
| 15 | a | 86.74  | 0.04327  | YES | YES |
| 16 | a | 96.62  | 0.57822  | YES | YES |
| 17 | a | 109.43 | 0.42627  | YES | YES |
| 18 | a | 114.10 | 0.77591  | YES | YES |
| 19 | a | 125.09 | 0.29870  | YES | YES |
| 20 | a | 139.91 | 0.23751  | YES | YES |
| 21 | a | 147.81 | 0.17597  | YES | YES |
| 22 | a | 157.72 | 0.40932  | YES | YES |
| 23 | a | 160.75 | 0.93429  | YES | YES |
| 24 | a | 166.63 | 0.17092  | YES | YES |
| 25 | a | 197.22 | 0.23595  | YES | YES |
| 26 | a | 218.08 | 0.19371  | YES | YES |
| 27 | a | 240.38 | 0.46477  | YES | YES |
| 28 | a | 253.84 | 0.64059  | YES | YES |
| 29 | a | 263.01 | 0.61563  | YES | YES |
| 30 | a | 296.72 | 2.08692  | YES | YES |
| 31 | a | 326.39 | 1.40105  | YES | YES |
| 32 | a | 358.07 | 7.40260  | YES | YES |
| 33 | a | 400.87 | 3.17185  | YES | YES |
| 34 | a | 401.88 | 0.60941  | YES | YES |
| 35 | a | 413.51 | 2.56676  | YES | YES |
| 36 | a | 428.75 | 2.81648  | YES | YES |
| 37 | a | 445.21 | 21.76269 | YES | YES |
| 38 | a | 452.26 | 1.83643  | YES | YES |
| 39 | a | 464.49 | 7.14943  | YES | YES |
| 40 | a | 476.70 | 0.11278  | YES | YES |
| 41 | a | 488.43 | 2.37409  | YES | YES |
| 42 | a | 500.20 | 9.44866  | YES | YES |
| 43 | a | 518.27 | 3.03466  | YES | YES |
| 44 | a | 529.63 | 23.82817 | YES | YES |
| 45 | a | 541.63 | 1.06373  | YES | YES |
| 46 | a | 544.47 | 13.48474 | YES | YES |
| 47 | a | 549.76 | 9.80746  | YES | YES |
| 48 | a | 557.70 | 1.89472  | YES | YES |
| 49 | a | 578.36 | 4.12900  | YES | YES |
| 50 | a | 595.17 | 0.22690  | YES | YES |

**TS<sub>23aa</sub>'**

SCF Energy (au) BP86/SV(P) -2427.853649810  
 SCF Energy (au) PBE0/def2-TZVPP -2427.411853990  
 SCF Energy (au) PBE0/def2-TZVPP -2427.4224059121 (Toluene Correction)  
 Zero Point Energy (au) 0.2956693  
 Chemical Potential (kJ mol<sup>-1</sup>) 626.31  
 Dispersion Correction (au) PBE0/def2-TZVPP -0.06517125

xyz coordinates

43

|    |            |            |            |
|----|------------|------------|------------|
| Mn | 1.0604984  | 1.9929986  | 0.6823022  |
| C  | 1.1926923  | 1.9710117  | 2.4887800  |
| C  | 2.8402352  | 1.7610039  | 0.5308806  |
| C  | 1.3031491  | 3.7726719  | 0.5343487  |
| O  | 1.4575616  | 4.9226638  | 0.4009624  |
| O  | 3.9979345  | 1.6996050  | 0.4251379  |
| O  | 1.2638844  | 1.9542238  | 3.6513366  |
| C  | -1.7427753 | 0.9781922  | 0.9238369  |
| C  | -1.7520834 | 3.3143000  | 0.7426142  |
| C  | -3.1498270 | 3.3684228  | 0.7892244  |
| C  | -3.8676255 | 2.1628212  | 0.8860943  |
| C  | -3.1576459 | 0.9614400  | 0.9491014  |
| C  | -0.8901215 | -0.2022918 | 1.0187510  |
| C  | 0.4721886  | 0.0135517  | 0.7444250  |
| C  | 1.4114444  | -1.0994791 | 0.9731314  |
| O  | 0.8391756  | -2.3394707 | 1.3652037  |
| C  | -0.4883289 | -2.5283980 | 1.5730719  |
| C  | -1.3770827 | -1.4975889 | 1.4105772  |
| O  | 2.6192985  | -1.0748372 | 0.8711519  |
| C  | -0.8132012 | -3.9270560 | 1.9988310  |
| N  | -1.0561467 | 2.1591024  | 0.8084151  |
| H  | 0.5555830  | 2.6948941  | -2.1509651 |
| C  | 0.6288065  | 1.9886473  | -1.3183179 |
| C  | 0.7477162  | 0.7162106  | -1.1093196 |
| H  | -1.1579647 | 4.2371139  | 0.6524449  |
| H  | -3.6603325 | 4.3429790  | 0.7462084  |
| H  | -4.9694859 | 2.1626073  | 0.9105492  |
| H  | -3.6911847 | 0.0015311  | 1.0122905  |
| H  | -2.4402450 | -1.6718158 | 1.6303188  |
| C  | 1.1039835  | -0.5017176 | -1.8602694 |
| H  | -1.9022736 | -4.0486906 | 2.1688486  |
| H  | -0.2713592 | -4.1858413 | 2.9365708  |
| H  | -0.4852060 | -4.6580329 | 1.2257502  |
| C  | 1.7790484  | -2.7511502 | -3.4308975 |
| C  | 0.5012548  | -2.6531301 | -2.8533448 |
| C  | 0.1673545  | -1.5412404 | -2.0635187 |
| C  | 2.3883301  | -0.6098079 | -2.4425055 |
| C  | 2.7209197  | -1.7283106 | -3.2208056 |
| H  | 2.0437175  | -3.6285309 | -4.0436556 |
| H  | -0.2420134 | -3.4504317 | -3.0172470 |
| H  | -0.8337747 | -1.4639422 | -1.6100762 |
| H  | 3.1263228  | 0.1883341  | -2.2657896 |
| H  | 3.7275781  | -1.8025624 | -3.6644467 |

\$vibrational spectrum

| # | mode | symmetry | wave number<br>cm**(-1) | IR intensity<br>km/mol | selection rules<br>IR RAMAN |
|---|------|----------|-------------------------|------------------------|-----------------------------|
| 1 |      | a        | -288.74                 | 0.00000                | YES YES                     |
| 2 |      |          | 0.00                    | 0.00000                | - -                         |
| 3 |      |          | 0.00                    | 0.00000                | - -                         |
| 4 |      |          | 0.00                    | 0.00000                | - -                         |
| 5 |      |          | 0.00                    | 0.00000                | - -                         |

|    |   |        |          |     |     |
|----|---|--------|----------|-----|-----|
| 6  |   | 0.00   | 0.00000  | -   | -   |
| 7  |   | 0.00   | 0.00000  | -   | -   |
| 8  | a | 21.46  | 0.39886  | YES | YES |
| 9  | a | 30.55  | 0.36529  | YES | YES |
| 10 | a | 45.61  | 0.14736  | YES | YES |
| 11 | a | 48.26  | 1.22449  | YES | YES |
| 12 | a | 61.67  | 1.09460  | YES | YES |
| 13 | a | 78.38  | 0.44833  | YES | YES |
| 14 | a | 80.46  | 0.36741  | YES | YES |
| 15 | a | 86.87  | 0.15774  | YES | YES |
| 16 | a | 87.52  | 0.03196  | YES | YES |
| 17 | a | 102.02 | 0.56412  | YES | YES |
| 18 | a | 117.64 | 0.72443  | YES | YES |
| 19 | a | 128.81 | 0.28060  | YES | YES |
| 20 | a | 139.44 | 0.17071  | YES | YES |
| 21 | a | 151.48 | 0.37273  | YES | YES |
| 22 | a | 154.69 | 1.64005  | YES | YES |
| 23 | a | 163.17 | 0.10362  | YES | YES |
| 24 | a | 183.63 | 4.33893  | YES | YES |
| 25 | a | 193.95 | 0.97564  | YES | YES |
| 26 | a | 205.28 | 1.95662  | YES | YES |
| 27 | a | 217.80 | 0.71034  | YES | YES |
| 28 | a | 241.30 | 0.10665  | YES | YES |
| 29 | a | 260.18 | 0.11090  | YES | YES |
| 30 | a | 294.13 | 2.09385  | YES | YES |
| 31 | a | 318.15 | 4.59114  | YES | YES |
| 32 | a | 336.13 | 5.10675  | YES | YES |
| 33 | a | 393.18 | 3.92944  | YES | YES |
| 34 | a | 401.13 | 0.22347  | YES | YES |
| 35 | a | 424.46 | 2.13993  | YES | YES |
| 36 | a | 442.37 | 0.36676  | YES | YES |
| 37 | a | 455.80 | 1.51566  | YES | YES |
| 38 | a | 461.35 | 3.17289  | YES | YES |
| 39 | a | 478.45 | 0.81725  | YES | YES |
| 40 | a | 486.10 | 4.10302  | YES | YES |
| 41 | a | 497.65 | 8.36675  | YES | YES |
| 42 | a | 504.82 | 14.06983 | YES | YES |
| 43 | a | 519.59 | 6.15730  | YES | YES |
| 44 | a | 527.76 | 18.80972 | YES | YES |
| 45 | a | 539.96 | 1.42932  | YES | YES |
| 46 | a | 550.42 | 22.84540 | YES | YES |
| 47 | a | 556.16 | 4.99382  | YES | YES |
| 48 | a | 559.43 | 1.35728  | YES | YES |
| 49 | a | 577.03 | 5.35828  | YES | YES |
| 50 | a | 595.77 | 4.13113  | YES | YES |

**TS<sub>23ba</sub>**

SCF Energy (au) BP86/SV(P) -2277.508412844  
SCF Energy (au) PBE0/def2-TZVPP -2277.059214716  
SCF Energy (au) PBE0/def2-TZVPP -2277.0663116709 (Toluene Correction)  
Zero Point Energy (au) 0.2893905  
Chemical Potential (kJ mol<sup>-1</sup>) 617.01  
Dispersion Correction (au) PBE0/def2-TZVPP -0.06065985

xyz coordinates

41

|    |            |            |            |
|----|------------|------------|------------|
| Mn | 1.5462735  | 0.3705217  | 0.7753154  |
| C  | 1.9074785  | 0.6310002  | 2.5277213  |
| C  | 3.2407096  | -0.1119005 | 0.4629426  |
| C  | 1.9480722  | 2.0777093  | 0.3447596  |
| O  | 2.2410160  | 3.1806368  | 0.0936545  |
| O  | 4.3448104  | -0.4362008 | 0.2648014  |
| O  | 2.1292592  | 0.7906648  | 3.6591366  |
| C  | -1.2537830 | -0.2555350 | 1.5959263  |
| C  | -1.0996745 | 1.9697746  | 0.8633464  |
| C  | -2.4649227 | 2.1924425  | 1.0617323  |
| C  | -3.2557673 | 1.1294770  | 1.5353928  |
| C  | -2.6464858 | -0.0988281 | 1.7968796  |
| C  | -0.5014315 | -1.4808271 | 1.8581717  |
| C  | 0.8516553  | -1.5011387 | 1.3910424  |
| C  | 1.6375491  | -2.6423727 | 1.7084079  |
| C  | 1.1063609  | -3.7167233 | 2.4268538  |
| C  | -0.2425309 | -3.7004240 | 2.8496778  |
| C  | -1.0364875 | -2.5874485 | 2.5642042  |
| H  | -0.4503635 | 2.7714576  | 0.4801914  |
| H  | -2.8950271 | 3.1812287  | 0.8405819  |
| H  | -4.3388895 | 1.2594921  | 1.6936461  |
| H  | -3.2441232 | -0.9503939 | 2.1538562  |
| H  | 2.6862936  | -2.6887826 | 1.3693071  |
| H  | 1.7476473  | -4.5817195 | 2.6667466  |
| H  | -0.6612248 | -4.5507498 | 3.4116467  |
| H  | -2.0786672 | -2.5634039 | 2.9225327  |
| N  | -0.5004788 | 0.7858067  | 1.1211501  |
| C  | 0.3494049  | 0.6612376  | -2.3782613 |
| C  | 0.9745764  | 1.8354334  | -2.8740594 |
| C  | 0.5652123  | 2.4058176  | -4.0878125 |
| C  | -0.4881425 | 1.8378149  | -4.8263467 |
| C  | -1.1277044 | 0.6820037  | -4.3411795 |
| C  | -0.7159981 | 0.0978621  | -3.1365469 |
| H  | 1.7966554  | 2.2946711  | -2.3060925 |
| H  | 1.0739469  | 3.3109476  | -4.4593641 |
| H  | -0.8125999 | 2.2955425  | -5.7753977 |
| H  | -1.9568402 | 0.2282210  | -4.9096864 |
| H  | -1.2183045 | -0.8065564 | -2.7569113 |
| C  | 0.7583943  | 0.0048373  | -1.1586284 |
| C  | 0.9391618  | -1.1406739 | -0.5838789 |
| H  | 1.1481747  | -2.1808689 | -0.8504819 |

\$vibrational spectrum

| # | mode | symmetry | wave number<br>cm** (-1) | IR intensity<br>km/mol | selection rules |       |
|---|------|----------|--------------------------|------------------------|-----------------|-------|
| # |      |          |                          |                        | IR              | RAMAN |
| 1 |      | a        | -230.16                  | 0.00000                | YES             | YES   |
| 2 |      |          | 0.00                     | 0.00000                | -               | -     |
| 3 |      |          | 0.00                     | 0.00000                | -               | -     |
| 4 |      |          | 0.00                     | 0.00000                | -               | -     |
| 5 |      |          | 0.00                     | 0.00000                | -               | -     |
| 6 |      |          | 0.00                     | 0.00000                | -               | -     |
| 7 |      |          | 0.00                     | 0.00000                | -               | -     |

|    |   |        |          |     |     |
|----|---|--------|----------|-----|-----|
| 8  | a | 15.33  | 0.05488  | YES | YES |
| 9  | a | 25.28  | 0.19576  | YES | YES |
| 10 | a | 45.61  | 0.05019  | YES | YES |
| 11 | a | 58.66  | 0.11086  | YES | YES |
| 12 | a | 71.59  | 0.08026  | YES | YES |
| 13 | a | 82.53  | 0.01510  | YES | YES |
| 14 | a | 89.55  | 0.28337  | YES | YES |
| 15 | a | 92.92  | 1.09647  | YES | YES |
| 16 | a | 100.46 | 0.46379  | YES | YES |
| 17 | a | 109.98 | 0.06435  | YES | YES |
| 18 | a | 116.38 | 0.03637  | YES | YES |
| 19 | a | 132.51 | 0.35585  | YES | YES |
| 20 | a | 162.15 | 1.17092  | YES | YES |
| 21 | a | 182.00 | 0.54087  | YES | YES |
| 22 | a | 187.25 | 0.55331  | YES | YES |
| 23 | a | 217.10 | 0.99499  | YES | YES |
| 24 | a | 233.54 | 0.82810  | YES | YES |
| 25 | a | 259.73 | 0.63802  | YES | YES |
| 26 | a | 278.83 | 0.12353  | YES | YES |
| 27 | a | 343.57 | 8.45214  | YES | YES |
| 28 | a | 359.38 | 1.36759  | YES | YES |
| 29 | a | 385.36 | 2.37851  | YES | YES |
| 30 | a | 402.36 | 0.07350  | YES | YES |
| 31 | a | 415.74 | 3.16983  | YES | YES |
| 32 | a | 430.74 | 1.25286  | YES | YES |
| 33 | a | 447.29 | 0.41322  | YES | YES |
| 34 | a | 453.95 | 8.13841  | YES | YES |
| 35 | a | 463.51 | 5.86149  | YES | YES |
| 36 | a | 474.07 | 1.00384  | YES | YES |
| 37 | a | 488.83 | 0.36260  | YES | YES |
| 38 | a | 496.72 | 7.61252  | YES | YES |
| 39 | a | 503.64 | 5.23803  | YES | YES |
| 40 | a | 522.87 | 0.37797  | YES | YES |
| 41 | a | 544.04 | 13.92394 | YES | YES |
| 42 | a | 546.27 | 13.93147 | YES | YES |
| 43 | a | 553.19 | 0.61857  | YES | YES |
| 44 | a | 583.04 | 24.49030 | YES | YES |
| 45 | a | 610.29 | 10.92190 | YES | YES |
| 46 | a | 614.19 | 12.97094 | YES | YES |
| 47 | a | 620.33 | 1.05024  | YES | YES |
| 48 | a | 625.80 | 33.87210 | YES | YES |
| 49 | a | 639.10 | 0.33601  | YES | YES |
| 50 | a | 656.26 | 9.87788  | YES | YES |

**TS<sub>23ba</sub>'**

SCF Energy (au) BP86/SV(P) -2277.498753669  
 SCF Energy (au) PBE0/def2-TZVPP -2277.050675757  
 SCF Energy (au) PBE0/def2-TZVPP -2277.0579338980 (Toluene Correction)  
 Zero Point Energy (au) 0.2891519  
 Chemical Potential (kJ mol<sup>-1</sup>) 617.56  
 Dispersion Correction (au) PBE0/def2-TZVPP -0.06291758

xyz coordinates

41

|    |            |            |            |
|----|------------|------------|------------|
| Mn | 1.1693515  | 1.7942172  | 0.3501382  |
| C  | 1.3530807  | 2.1824100  | 2.1120978  |
| C  | 2.8984100  | 1.3543494  | 0.2491536  |
| C  | 1.5418946  | 3.4606063  | -0.2139974 |
| O  | 1.7908638  | 4.5248368  | -0.6268932 |
| O  | 4.0275882  | 1.0587937  | 0.1914371  |
| O  | 1.4670734  | 2.4424552  | 3.2421069  |
| C  | -1.6743451 | 1.0921558  | 0.9437799  |
| C  | -1.5381688 | 3.2923065  | 0.1440870  |
| C  | -2.9237216 | 3.4672754  | 0.2150309  |
| C  | -3.7137545 | 2.3901122  | 0.6558466  |
| C  | -3.0839075 | 1.1971132  | 1.0167486  |
| C  | -0.9017448 | -0.0900528 | 1.3304482  |
| C  | 0.4690251  | -0.1133275 | 0.9201197  |
| C  | 1.2675083  | -1.2000501 | 1.3628840  |
| C  | 0.7451521  | -2.2018261 | 2.1868477  |
| C  | -0.6142475 | -2.1778035 | 2.5683531  |
| C  | -1.4316588 | -1.1289586 | 2.1356710  |
| H  | -0.8861808 | 4.1064682  | -0.2083692 |
| H  | -3.3692387 | 4.4305340  | -0.0775210 |
| H  | -4.8108328 | 2.4810647  | 0.7124324  |
| H  | -3.6776879 | 0.3328533  | 1.3496471  |
| H  | 2.3232634  | -1.2577098 | 1.0512727  |
| H  | 1.4009614  | -3.0169031 | 2.5362660  |
| H  | -1.0266261 | -2.9709426 | 3.2128557  |
| H  | -2.4836241 | -1.0931220 | 2.4637971  |
| N  | -0.9209399 | 2.1431123  | 0.4957934  |
| H  | 0.6382497  | 1.8377141  | -2.5520672 |
| C  | 0.6896772  | 1.3458523  | -1.5751871 |
| C  | 0.6556402  | 0.1490567  | -1.0778296 |
| C  | 0.8042723  | -1.2237752 | -1.5915096 |
| C  | 1.0787431  | -3.7779246 | -2.7828737 |
| C  | 2.0089812  | -2.7639563 | -3.0681654 |
| C  | 1.8725870  | -1.4960946 | -2.4811888 |
| C  | -0.1193572 | -2.2559564 | -1.3035661 |
| C  | 0.0135775  | -3.5173396 | -1.9016755 |
| H  | 1.1842179  | -4.7734357 | -3.2452973 |
| H  | 2.8502730  | -2.9600918 | -3.7535367 |
| H  | 2.6014809  | -0.6992120 | -2.6983808 |
| H  | -0.9532646 | -2.0579155 | -0.6121681 |
| H  | -0.7225716 | -4.3068894 | -1.6765880 |

\$vibrational spectrum

| # | mode | symmetry | wave number<br>cm** (-1) | IR intensity<br>km/mol | selection rules<br>IR RAMAN |
|---|------|----------|--------------------------|------------------------|-----------------------------|
| # |      |          |                          |                        |                             |
| 1 |      | a        | -281.20                  | 0.00000                | YES YES                     |
| 2 |      |          | 0.00                     | 0.00000                | - -                         |
| 3 |      |          | 0.00                     | 0.00000                | - -                         |
| 4 |      |          | 0.00                     | 0.00000                | - -                         |
| 5 |      |          | 0.00                     | 0.00000                | - -                         |
| 6 |      |          | 0.00                     | 0.00000                | - -                         |
| 7 |      |          | 0.00                     | 0.00000                | - -                         |

|    |   |        |          |     |     |
|----|---|--------|----------|-----|-----|
| 8  | a | 24.93  | 0.17999  | YES | YES |
| 9  | a | 27.66  | 0.48622  | YES | YES |
| 10 | a | 45.67  | 0.02077  | YES | YES |
| 11 | a | 62.41  | 0.22472  | YES | YES |
| 12 | a | 65.71  | 0.29527  | YES | YES |
| 13 | a | 78.12  | 0.03628  | YES | YES |
| 14 | a | 88.38  | 0.19623  | YES | YES |
| 15 | a | 91.74  | 0.15481  | YES | YES |
| 16 | a | 100.11 | 0.55229  | YES | YES |
| 17 | a | 104.64 | 0.31790  | YES | YES |
| 18 | a | 117.99 | 0.09532  | YES | YES |
| 19 | a | 140.73 | 0.44197  | YES | YES |
| 20 | a | 163.87 | 0.86445  | YES | YES |
| 21 | a | 173.92 | 2.70349  | YES | YES |
| 22 | a | 194.82 | 1.83630  | YES | YES |
| 23 | a | 215.19 | 2.41823  | YES | YES |
| 24 | a | 221.11 | 2.12687  | YES | YES |
| 25 | a | 248.39 | 0.85224  | YES | YES |
| 26 | a | 282.00 | 0.34236  | YES | YES |
| 27 | a | 311.11 | 3.32284  | YES | YES |
| 28 | a | 357.00 | 1.24876  | YES | YES |
| 29 | a | 402.97 | 0.19811  | YES | YES |
| 30 | a | 405.95 | 4.72270  | YES | YES |
| 31 | a | 412.17 | 4.75989  | YES | YES |
| 32 | a | 438.81 | 1.52677  | YES | YES |
| 33 | a | 459.78 | 0.38930  | YES | YES |
| 34 | a | 464.82 | 0.37031  | YES | YES |
| 35 | a | 476.22 | 0.84671  | YES | YES |
| 36 | a | 488.03 | 1.90597  | YES | YES |
| 37 | a | 495.73 | 1.86045  | YES | YES |
| 38 | a | 503.95 | 1.64839  | YES | YES |
| 39 | a | 508.14 | 20.16433 | YES | YES |
| 40 | a | 530.44 | 4.19986  | YES | YES |
| 41 | a | 536.50 | 13.61825 | YES | YES |
| 42 | a | 551.86 | 3.52941  | YES | YES |
| 43 | a | 558.62 | 18.82493 | YES | YES |
| 44 | a | 563.39 | 4.96911  | YES | YES |
| 45 | a | 607.86 | 39.79700 | YES | YES |
| 46 | a | 613.27 | 0.66942  | YES | YES |
| 47 | a | 619.75 | 1.86931  | YES | YES |
| 48 | a | 625.45 | 41.97016 | YES | YES |
| 49 | a | 639.98 | 3.75850  | YES | YES |
| 50 | a | 655.90 | 36.17631 | YES | YES |

**TS<sub>23bb</sub>**

SCF Energy (au) BP86/SV(P) -2505.228414752  
 SCF Energy (au) PBE0/def2-TZVPP -2504.778820226  
 SCF Energy (au) PBE0/def2-TZVPP -2504.7885430275 (Toluene Correction)  
 Zero Point Energy (au) 0.3313323  
 Chemical Potential (kJ mol<sup>-1</sup>) 705.79  
 Dispersion Correction (au) PBE0/def2-TZVPP -0.06493997

## xyz coordinates

47

|    |            |            |            |
|----|------------|------------|------------|
| Mn | 1.5438696  | 0.9121769  | 1.8459137  |
| C  | 2.0798231  | 0.9719827  | 3.5736955  |
| C  | 3.1974123  | 0.4569030  | 1.3335957  |
| C  | 1.9102005  | 2.6474432  | 1.5317027  |
| O  | 2.1536748  | 3.7650521  | 1.2941777  |
| O  | 4.2787058  | 0.1493930  | 1.0206017  |
| O  | 2.4160219  | 1.0083613  | 4.6878982  |
| C  | -1.1654630 | 0.1794923  | 2.8715540  |
| C  | -1.0519913 | 2.4881328  | 2.4653612  |
| C  | -2.3845969 | 2.6819223  | 2.8412507  |
| C  | -3.1387447 | 1.5606537  | 3.2329710  |
| C  | -2.5251532 | 0.3067525  | 3.2449353  |
| C  | -0.4090617 | -1.0728962 | 2.8813346  |
| C  | 0.8736495  | -1.0406434 | 2.2486695  |
| C  | 1.6714458  | -2.2132932 | 2.3163424  |
| C  | 1.2170098  | -3.3654072 | 2.9657126  |
| C  | -0.0642883 | -3.3954557 | 3.5605320  |
| C  | -0.8684506 | -2.2533241 | 3.5161742  |
| H  | -0.4291977 | 3.3392628  | 2.1480412  |
| H  | -2.8179453 | 3.6938075  | 2.8222620  |
| H  | -4.1964514 | 1.6664260  | 3.5247371  |
| H  | -3.0947039 | -0.5874665 | 3.5376316  |
| H  | 2.6647491  | -2.2217370 | 1.8373571  |
| H  | 1.8666377  | -4.2555965 | 3.0141119  |
| H  | -0.4225746 | -4.3057289 | 4.0675956  |
| H  | -1.8534569 | -2.2681725 | 4.0106361  |
| N  | -0.4512635 | 1.2776419  | 2.4717770  |
| C  | 0.3693367  | 1.7188046  | -1.1444068 |
| C  | 0.6498899  | 0.8052351  | -0.0221054 |
| C  | 0.7090328  | -0.4233841 | 0.3630955  |
| H  | 0.6788933  | -1.4385500 | -0.0426014 |
| O  | -0.1688441 | 1.0330044  | -2.3015015 |
| H  | -0.4003790 | 2.4718013  | -0.8668055 |
| H  | 1.2983409  | 2.2526720  | -1.4426764 |
| C  | 0.7049208  | 0.7742823  | -3.3204458 |
| O  | 1.8753878  | 1.1155984  | -3.3111180 |
| C  | 0.0472152  | 0.0363104  | -4.4440085 |
| C  | -1.0840302 | -1.3458045 | -6.6194205 |
| C  | -1.8713107 | -1.0393509 | -5.4947766 |
| C  | -1.3103816 | -0.3504427 | -4.4085130 |
| C  | 0.8333988  | -0.2740593 | -5.5746196 |
| C  | 0.2691938  | -0.9621104 | -6.6578499 |
| H  | -1.5277977 | -1.8874805 | -7.4714750 |
| H  | -2.9315905 | -1.3404367 | -5.4649314 |
| H  | -1.9178860 | -0.1074050 | -3.5239907 |
| H  | 1.8897097  | 0.0374432  | -5.5794971 |
| H  | 0.8870432  | -1.2018104 | -7.5389247 |

## \$vibrational spectrum

| # | mode | symmetry | wave number | IR intensity | selection rules |
|---|------|----------|-------------|--------------|-----------------|
| # |      |          | cm**(-1)    | km/mol       | IR RAMAN        |
| 1 |      | a        | -244.44     | 0.00000      | YES YES         |



|    |   |        |          |     |     |
|----|---|--------|----------|-----|-----|
| 2  |   | 0.00   | 0.00000  | -   | -   |
| 3  |   | 0.00   | 0.00000  | -   | -   |
| 4  |   | 0.00   | 0.00000  | -   | -   |
| 5  |   | 0.00   | 0.00000  | -   | -   |
| 6  |   | 0.00   | 0.00000  | -   | -   |
| 7  |   | 0.00   | 0.00000  | -   | -   |
| 8  | a | 10.09  | 0.14991  | YES | YES |
| 9  | a | 12.41  | 0.42334  | YES | YES |
| 10 | a | 19.22  | 0.07028  | YES | YES |
| 11 | a | 36.42  | 0.34341  | YES | YES |
| 12 | a | 49.37  | 0.00449  | YES | YES |
| 13 | a | 53.56  | 1.03068  | YES | YES |
| 14 | a | 63.81  | 0.10861  | YES | YES |
| 15 | a | 68.11  | 0.21311  | YES | YES |
| 16 | a | 81.72  | 0.07782  | YES | YES |
| 17 | a | 91.80  | 0.56193  | YES | YES |
| 18 | a | 94.63  | 0.43159  | YES | YES |
| 19 | a | 101.38 | 0.53503  | YES | YES |
| 20 | a | 106.77 | 0.28635  | YES | YES |
| 21 | a | 122.46 | 0.47390  | YES | YES |
| 22 | a | 144.26 | 0.30543  | YES | YES |
| 23 | a | 165.36 | 0.72460  | YES | YES |
| 24 | a | 171.49 | 0.24320  | YES | YES |
| 25 | a | 185.89 | 0.55184  | YES | YES |
| 26 | a | 213.01 | 0.47639  | YES | YES |
| 27 | a | 230.75 | 3.89429  | YES | YES |
| 28 | a | 239.47 | 1.28996  | YES | YES |
| 29 | a | 248.79 | 3.55678  | YES | YES |
| 30 | a | 275.42 | 0.73147  | YES | YES |
| 31 | a | 280.32 | 1.12081  | YES | YES |
| 32 | a | 328.93 | 26.14672 | YES | YES |
| 33 | a | 358.46 | 1.92623  | YES | YES |
| 34 | a | 362.92 | 3.07572  | YES | YES |
| 35 | a | 404.07 | 0.86355  | YES | YES |
| 36 | a | 404.41 | 2.01337  | YES | YES |
| 37 | a | 417.15 | 1.67101  | YES | YES |
| 38 | a | 431.57 | 5.04544  | YES | YES |
| 39 | a | 439.66 | 0.34171  | YES | YES |
| 40 | a | 446.69 | 1.08182  | YES | YES |
| 41 | a | 461.13 | 0.75367  | YES | YES |
| 42 | a | 471.59 | 3.36562  | YES | YES |
| 43 | a | 483.05 | 4.85382  | YES | YES |
| 44 | a | 487.66 | 0.99726  | YES | YES |
| 45 | a | 495.49 | 1.19401  | YES | YES |
| 46 | a | 503.25 | 1.96319  | YES | YES |
| 47 | a | 538.01 | 10.91463 | YES | YES |
| 48 | a | 541.54 | 18.16062 | YES | YES |
| 49 | a | 555.44 | 1.04452  | YES | YES |
| 50 | a | 608.16 | 29.89436 | YES | YES |

**TS<sub>23bb</sub>'**

SCF Energy (au) BP86/SV(P) -2505.224054475  
 SCF Energy (au) PBE0/def2-TZVPP -2504.774662695  
 SCF Energy (au) PBE0/def2-TZVPP -2504.7841905779 (Toluene Correction)  
 Zero Point Energy (au) 0.3314439  
 Chemical Potential (kJ mol<sup>-1</sup>) 709.37  
 Dispersion Correction (au) PBE0/def2-TZVPP -0.06628063

## xyz coordinates

47

|    |            |            |            |
|----|------------|------------|------------|
| Mn | 1.2176947  | 1.8127312  | 1.4456319  |
| C  | 1.4666299  | 2.4182820  | 3.1346110  |
| C  | 2.8893178  | 1.1728893  | 1.4137244  |
| C  | 1.7679512  | 3.3323829  | 0.6551328  |
| O  | 2.1268865  | 4.2962021  | 0.1018704  |
| O  | 3.9807488  | 0.7592320  | 1.4167611  |
| O  | 1.6187517  | 2.8163816  | 4.2189751  |
| C  | -1.6838173 | 1.5142621  | 2.1055525  |
| C  | -1.2983862 | 3.5883820  | 1.0814943  |
| C  | -2.6544880 | 3.9279053  | 1.1212621  |
| C  | -3.5615029 | 3.0007085  | 1.6654012  |
| C  | -3.0715137 | 1.7883817  | 2.1557660  |
| C  | -1.0522446 | 0.3000024  | 2.6278138  |
| C  | 0.3178775  | 0.0931789  | 2.2594279  |
| C  | 0.9900761  | -1.0164614 | 2.8399414  |
| C  | 0.3403405  | -1.8804578 | 3.7303729  |
| C  | -1.0174117 | -1.6817832 | 4.0587049  |
| C  | -1.7050384 | -0.5940762 | 3.5088041  |
| H  | -0.5586526 | 4.2812524  | 0.6514182  |
| H  | -2.9875741 | 4.8995658  | 0.7252030  |
| H  | -4.6407100 | 3.2219184  | 1.7026697  |
| H  | -3.7603152 | 1.0398129  | 2.5746974  |
| H  | 2.0494275  | -1.1997610 | 2.5938167  |
| H  | 0.8985435  | -2.7185790 | 4.1805668  |
| H  | -1.5292451 | -2.3650339 | 4.7553365  |
| H  | -2.7527021 | -0.4154062 | 3.8017342  |
| N  | -0.8163498 | 2.4183728  | 1.5543468  |
| H  | 0.6856472  | 1.5157013  | -1.4528148 |
| C  | 0.6638975  | 1.1671894  | -0.4166241 |
| C  | 0.4808754  | 0.0959589  | 0.2799620  |
| C  | 0.2934903  | -1.3751688 | 0.0287064  |
| H  | 1.1764943  | -1.9454385 | 0.3875599  |
| O  | 0.1108113  | -1.6183489 | -1.3743703 |
| H  | -0.6198903 | -1.7588766 | 0.5291987  |
| C  | 1.2148822  | -2.0214416 | -2.0778786 |
| C  | 0.9116156  | -2.2027878 | -3.5308409 |
| O  | 2.3038448  | -2.2167652 | -1.5675274 |
| C  | 0.4570424  | -2.5830452 | -6.2818126 |
| C  | -0.5934419 | -2.1600732 | -5.4474376 |
| C  | -0.3701491 | -1.9689868 | -4.0754074 |
| C  | 1.9629695  | -2.6268606 | -4.3723148 |
| C  | 1.7357560  | -2.8156257 | -5.7425261 |
| H  | 0.2779652  | -2.7320770 | -7.3598355 |
| H  | -1.5950647 | -1.9776276 | -5.8706516 |
| H  | -1.1845808 | -1.6372763 | -3.4145553 |
| H  | 2.9540616  | -2.8025317 | -3.9254058 |
| H  | 2.5594795  | -3.1462033 | -6.3964612 |

## \$vibrational spectrum

| # | mode | symmetry | wave number | IR intensity | selection rules |
|---|------|----------|-------------|--------------|-----------------|
| # |      |          | cm**(-1)    | km/mol       | IR RAMAN        |
| 1 |      | a        | -278.19     | 0.00000      | YES YES         |

|    |   |        |          |     |     |
|----|---|--------|----------|-----|-----|
| 2  |   | 0.00   | 0.00000  | -   | -   |
| 3  |   | 0.00   | 0.00000  | -   | -   |
| 4  |   | 0.00   | 0.00000  | -   | -   |
| 5  |   | 0.00   | 0.00000  | -   | -   |
| 6  |   | 0.00   | 0.00000  | -   | -   |
| 7  |   | 0.00   | 0.00000  | -   | -   |
| 8  | a | 14.29  | 0.20383  | YES | YES |
| 9  | a | 18.08  | 0.34253  | YES | YES |
| 10 | a | 22.29  | 0.24399  | YES | YES |
| 11 | a | 44.01  | 0.53700  | YES | YES |
| 12 | a | 48.83  | 0.03663  | YES | YES |
| 13 | a | 55.33  | 0.76764  | YES | YES |
| 14 | a | 62.75  | 0.67513  | YES | YES |
| 15 | a | 72.87  | 0.20665  | YES | YES |
| 16 | a | 81.93  | 0.03362  | YES | YES |
| 17 | a | 91.19  | 0.30181  | YES | YES |
| 18 | a | 97.97  | 0.10896  | YES | YES |
| 19 | a | 100.80 | 0.65510  | YES | YES |
| 20 | a | 104.64 | 0.37368  | YES | YES |
| 21 | a | 131.83 | 0.49765  | YES | YES |
| 22 | a | 143.99 | 0.40575  | YES | YES |
| 23 | a | 153.64 | 0.20252  | YES | YES |
| 24 | a | 174.60 | 0.14773  | YES | YES |
| 25 | a | 189.03 | 0.20652  | YES | YES |
| 26 | a | 212.84 | 2.82187  | YES | YES |
| 27 | a | 221.80 | 0.80722  | YES | YES |
| 28 | a | 240.53 | 0.72260  | YES | YES |
| 29 | a | 261.29 | 0.28153  | YES | YES |
| 30 | a | 281.46 | 0.06689  | YES | YES |
| 31 | a | 337.95 | 16.67654 | YES | YES |
| 32 | a | 345.86 | 3.26526  | YES | YES |
| 33 | a | 370.77 | 4.72862  | YES | YES |
| 34 | a | 372.63 | 8.71314  | YES | YES |
| 35 | a | 404.28 | 0.00737  | YES | YES |
| 36 | a | 416.30 | 4.57346  | YES | YES |
| 37 | a | 428.03 | 2.77797  | YES | YES |
| 38 | a | 438.60 | 0.63452  | YES | YES |
| 39 | a | 447.54 | 4.17340  | YES | YES |
| 40 | a | 457.06 | 1.37976  | YES | YES |
| 41 | a | 464.31 | 0.81569  | YES | YES |
| 42 | a | 474.49 | 7.60730  | YES | YES |
| 43 | a | 486.49 | 5.48000  | YES | YES |
| 44 | a | 492.07 | 3.12404  | YES | YES |
| 45 | a | 497.16 | 0.53026  | YES | YES |
| 46 | a | 520.26 | 8.99771  | YES | YES |
| 47 | a | 536.66 | 8.13746  | YES | YES |
| 48 | a | 539.91 | 7.75461  | YES | YES |
| 49 | a | 557.69 | 1.52783  | YES | YES |
| 50 | a | 594.61 | 14.24688 | YES | YES |

**TS<sub>23bc</sub>**

|                                            |                                       |
|--------------------------------------------|---------------------------------------|
| SCF Energy (au) BP86/SV(P)                 | -2281.108277972                       |
| SCF Energy (au) PBE0/def2-TZVPP            | -2280.675226907                       |
| SCF Energy (au) PBE0/def2-TZVPP            | -2280.6812177349 (Toluene Correction) |
| Zero Point Energy (au)                     | 0.3569715                             |
| Chemical Potential (kJ mol <sup>-1</sup> ) | 792.89                                |
| Dispersion Correction (au) PBE0/def2-TZVPP | -0.06589746                           |

xyz coordinates

47

|    |            |            |            |
|----|------------|------------|------------|
| Mn | 1.2409727  | 0.0904313  | 1.1054278  |
| C  | 1.7311248  | 0.3069725  | 2.8341453  |
| C  | 2.9349362  | -0.2493845 | 0.6484351  |
| C  | 1.4660984  | 1.8319250  | 0.7125130  |
| O  | 1.6364875  | 2.9606134  | 0.4571049  |
| O  | 4.0432610  | -0.4834398 | 0.3624492  |
| O  | 2.0488129  | 0.4436701  | 3.9464924  |
| C  | -1.4110895 | -0.8149669 | 2.1472777  |
| C  | -1.4941407 | 1.4652372  | 1.6033007  |
| C  | -2.8401766 | 1.5663616  | 1.9674951  |
| C  | -3.4994615 | 0.4091231  | 2.4211488  |
| C  | -2.7800988 | -0.7837775 | 2.5083186  |
| C  | -0.5475761 | -1.9909043 | 2.2519126  |
| C  | 0.7415510  | -1.8796712 | 1.6418711  |
| C  | 1.6444047  | -2.9638656 | 1.8098994  |
| C  | 1.2824482  | -4.1071377 | 2.5287496  |
| C  | -0.0064634 | -4.2200319 | 3.0972038  |
| C  | -0.9113734 | -3.1642600 | 2.9579791  |
| H  | -0.9461394 | 2.3464649  | 1.2361120  |
| H  | -3.3574921 | 2.5350863  | 1.8893364  |
| H  | -4.5644064 | 0.4401332  | 2.7038761  |
| H  | -3.2718994 | -1.7047943 | 2.8544300  |
| H  | 2.6470104  | -2.9102543 | 1.3538155  |
| H  | 2.0115115  | -4.9257753 | 2.6532134  |
| H  | -0.2919077 | -5.1243727 | 3.6582021  |
| H  | -1.9036072 | -3.2389523 | 3.4322280  |
| N  | -0.7912019 | 0.3135281  | 1.6784625  |
| C  | 0.2036167  | 0.4229103  | -2.1177340 |
| C  | 0.4513932  | -0.2496748 | -0.8076748 |
| C  | 0.5544724  | -1.4233179 | -0.2809152 |
| H  | 0.5633337  | -2.4760312 | -0.5790808 |
| C  | 1.5251228  | 0.9180035  | -2.7641032 |
| H  | -0.2221469 | -0.3552697 | -2.7995672 |
| C  | -0.8249443 | 1.5785412  | -2.0498146 |
| H  | 1.9931170  | 1.6754389  | -2.0945966 |
| C  | 1.2743359  | 1.5382902  | -4.1498764 |
| H  | 2.2434790  | 0.0717299  | -2.8390196 |
| C  | -1.0745684 | 2.1931968  | -3.4382736 |
| H  | -0.4370484 | 2.3638521  | -1.3613850 |
| H  | -1.7785201 | 1.2070255  | -1.6127079 |
| H  | 2.2338584  | 1.9152600  | -4.5702918 |
| C  | 0.2347654  | 2.6710113  | -4.0898355 |
| H  | 0.9156396  | 0.7455923  | -4.8492349 |
| H  | -1.7966169 | 3.0368433  | -3.3533072 |
| H  | -1.5580063 | 1.4319299  | -4.0963259 |
| H  | 0.0361840  | 3.0674924  | -5.1113184 |
| H  | 0.6509482  | 3.5192177  | -3.4963377 |

\$vibrational spectrum

| #  | mode | symmetry | wave number<br>cm**(-1) | IR intensity<br>km/mol | selection rules |       |
|----|------|----------|-------------------------|------------------------|-----------------|-------|
| #  |      |          |                         |                        | IR              | RAMAN |
| 1  |      | a        | -233.32                 | 0.00000                | YES             | YES   |
| 2  |      |          | 0.00                    | 0.00000                | -               | -     |
| 3  |      |          | 0.00                    | 0.00000                | -               | -     |
| 4  |      |          | 0.00                    | 0.00000                | -               | -     |
| 5  |      |          | 0.00                    | 0.00000                | -               | -     |
| 6  |      |          | 0.00                    | 0.00000                | -               | -     |
| 7  |      |          | 0.00                    | 0.00000                | -               | -     |
| 8  |      | a        | 25.44                   | 0.27019                | YES             | YES   |
| 9  |      | a        | 35.20                   | 0.13176                | YES             | YES   |
| 10 |      | a        | 46.20                   | 0.02342                | YES             | YES   |
| 11 |      | a        | 53.63                   | 0.13003                | YES             | YES   |
| 12 |      | a        | 66.66                   | 0.05869                | YES             | YES   |
| 13 |      | a        | 78.23                   | 0.40040                | YES             | YES   |
| 14 |      | a        | 89.32                   | 0.15455                | YES             | YES   |
| 15 |      | a        | 92.83                   | 0.72234                | YES             | YES   |
| 16 |      | a        | 100.02                  | 0.31098                | YES             | YES   |
| 17 |      | a        | 107.64                  | 0.22848                | YES             | YES   |
| 18 |      | a        | 111.47                  | 0.08287                | YES             | YES   |
| 19 |      | a        | 118.84                  | 0.19875                | YES             | YES   |
| 20 |      | a        | 139.08                  | 0.70360                | YES             | YES   |
| 21 |      | a        | 164.03                  | 0.45277                | YES             | YES   |
| 22 |      | a        | 178.62                  | 0.17963                | YES             | YES   |
| 23 |      | a        | 203.50                  | 0.48532                | YES             | YES   |
| 24 |      | a        | 222.28                  | 0.01933                | YES             | YES   |
| 25 |      | a        | 230.18                  | 2.70261                | YES             | YES   |
| 26 |      | a        | 252.56                  | 0.24883                | YES             | YES   |
| 27 |      | a        | 275.88                  | 0.27280                | YES             | YES   |
| 28 |      | a        | 297.12                  | 0.59696                | YES             | YES   |
| 29 |      | a        | 350.68                  | 0.94622                | YES             | YES   |
| 30 |      | a        | 357.11                  | 3.26921                | YES             | YES   |
| 31 |      | a        | 369.95                  | 2.21091                | YES             | YES   |
| 32 |      | a        | 406.80                  | 5.59754                | YES             | YES   |
| 33 |      | a        | 420.17                  | 1.06675                | YES             | YES   |
| 34 |      | a        | 426.52                  | 2.17763                | YES             | YES   |
| 35 |      | a        | 438.74                  | 0.84404                | YES             | YES   |
| 36 |      | a        | 454.19                  | 11.41550               | YES             | YES   |
| 37 |      | a        | 459.39                  | 1.23093                | YES             | YES   |
| 38 |      | a        | 471.27                  | 2.01419                | YES             | YES   |
| 39 |      | a        | 471.95                  | 3.22404                | YES             | YES   |
| 40 |      | a        | 489.54                  | 1.07058                | YES             | YES   |
| 41 |      | a        | 497.71                  | 3.64178                | YES             | YES   |
| 42 |      | a        | 501.29                  | 0.55328                | YES             | YES   |
| 43 |      | a        | 512.85                  | 3.57526                | YES             | YES   |
| 44 |      | a        | 538.43                  | 8.95694                | YES             | YES   |
| 45 |      | a        | 546.38                  | 13.34263               | YES             | YES   |
| 46 |      | a        | 554.60                  | 0.78629                | YES             | YES   |
| 47 |      | a        | 575.01                  | 5.02399                | YES             | YES   |
| 48 |      | a        | 608.92                  | 30.54046               | YES             | YES   |
| 49 |      | a        | 620.85                  | 1.38396                | YES             | YES   |
| 50 |      | a        | 626.27                  | 27.58342               | YES             | YES   |

**TS<sub>23bc</sub>'**

|                                            |                                       |
|--------------------------------------------|---------------------------------------|
| SCF Energy (au) BP86/SV(P)                 | -2281.103977722                       |
| SCF Energy (au) PBE0/def2-TZVPP            | -2280.671218205                       |
| SCF Energy (au) PBE0/def2-TZVPP            | -2280.6773988784 (Toluene Correction) |
| Zero Point Energy (au)                     | 0.3568424                             |
| Chemical Potential (kJ mol <sup>-1</sup> ) | 797.65                                |
| Dispersion Correction (au) PBE0/def2-TZVPP | -0.06661635                           |

xyz coordinates

47

|    |            |            |            |
|----|------------|------------|------------|
| Mn | 1.0584974  | 2.0075745  | 0.8636094  |
| C  | 1.4065610  | 2.2963033  | 2.6176727  |
| C  | 2.7788548  | 1.6425535  | 0.5573960  |
| C  | 1.3205956  | 3.7147665  | 0.3651363  |
| O  | 1.4974053  | 4.8097286  | -0.0032252 |
| O  | 3.9057319  | 1.3940366  | 0.3681308  |
| O  | 1.6234799  | 2.4911867  | 3.7462495  |
| C  | -1.7061683 | 1.1522758  | 1.6243631  |
| C  | -1.6886102 | 3.4310935  | 1.0701333  |
| C  | -3.0684950 | 3.5500041  | 1.2626764  |
| C  | -3.7950418 | 2.4032639  | 1.6319445  |
| C  | -3.1089848 | 1.2000750  | 1.8086790  |
| C  | -0.8726400 | -0.0319920 | 1.8388759  |
| C  | 0.4736055  | 0.0450664  | 1.3512083  |
| C  | 1.3479316  | -1.0237779 | 1.6922311  |
| C  | 0.9071021  | -2.1236832 | 2.4369192  |
| C  | -0.4377380 | -2.2114362 | 2.8578647  |
| C  | -1.3174290 | -1.1648302 | 2.5617230  |
| H  | -1.0871356 | 4.3015186  | 0.7649208  |
| H  | -3.5595699 | 4.5246115  | 1.1173136  |
| H  | -4.8867356 | 2.4495819  | 1.7772479  |
| H  | -3.6530995 | 0.2847545  | 2.0850452  |
| H  | 2.4021464  | -0.9837975 | 1.3745237  |
| H  | 1.6198810  | -2.9228353 | 2.7019266  |
| H  | -0.7867523 | -3.0815597 | 3.4369294  |
| H  | -2.3524705 | -1.2085626 | 2.9388834  |
| N  | -1.0173060 | 2.2713703  | 1.2407304  |
| H  | 0.2052153  | 2.1992758  | -1.9447688 |
| C  | 0.3697731  | 1.6399617  | -1.0188688 |
| C  | 0.4261576  | 0.4189076  | -0.5900383 |
| C  | 0.4748275  | -0.9544359 | -1.2231924 |
| C  | -0.5425282 | -1.0274437 | -2.3907468 |
| H  | 0.1864101  | -1.7265873 | -0.4769103 |
| C  | 1.8966294  | -1.2981526 | -1.7380544 |
| C  | 1.9297454  | -2.6760491 | -2.4233278 |
| H  | 2.6279615  | -1.2662767 | -0.9017107 |
| H  | 2.2091946  | -0.5067970 | -2.4582144 |
| H  | -1.5643380 | -0.8028396 | -2.0120097 |
| C  | -0.5107904 | -2.4069750 | -3.0738193 |
| H  | -0.2949055 | -0.2366847 | -3.1362682 |
| H  | -0.8600705 | -3.1820754 | -2.3511143 |
| H  | -1.2319186 | -2.4215374 | -3.9225519 |
| H  | 1.7134871  | -3.4671955 | -1.6670317 |
| H  | 2.9551625  | -2.8796649 | -2.8066906 |
| C  | 0.9019421  | -2.7681382 | -3.5641145 |
| H  | 0.9073472  | -3.7886735 | -4.0097542 |
| H  | 1.1970819  | -2.0659092 | -4.3799218 |

\$vibrational spectrum

| #  | mode | symmetry | wave number<br>cm**(-1) | IR intensity<br>km/mol | selection rules |       |
|----|------|----------|-------------------------|------------------------|-----------------|-------|
| #  |      |          |                         |                        | IR              | RAMAN |
| 1  |      | a        | -292.01                 | 0.00000                | YES             | YES   |
| 2  |      | a        | -3.78                   | 0.00000                | YES             | YES   |
| 3  |      |          | 0.00                    | 0.00000                | -               | -     |
| 4  |      |          | 0.00                    | 0.00000                | -               | -     |
| 5  |      |          | 0.00                    | 0.00000                | -               | -     |
| 6  |      |          | 0.00                    | 0.00000                | -               | -     |
| 7  |      |          | 0.00                    | 0.00000                | -               | -     |
| 8  |      |          | 0.00                    | 0.00000                | -               | -     |
| 9  |      | a        | 28.49                   | 0.43330                | YES             | YES   |
| 10 |      | a        | 46.44                   | 0.00067                | YES             | YES   |
| 11 |      | a        | 51.71                   | 0.11284                | YES             | YES   |
| 12 |      | a        | 64.85                   | 0.27708                | YES             | YES   |
| 13 |      | a        | 79.34                   | 0.02072                | YES             | YES   |
| 14 |      | a        | 89.33                   | 0.29511                | YES             | YES   |
| 15 |      | a        | 92.02                   | 0.20021                | YES             | YES   |
| 16 |      | a        | 101.05                  | 0.72661                | YES             | YES   |
| 17 |      | a        | 104.97                  | 0.29552                | YES             | YES   |
| 18 |      | a        | 111.48                  | 0.11726                | YES             | YES   |
| 19 |      | a        | 127.74                  | 0.14195                | YES             | YES   |
| 20 |      | a        | 163.52                  | 1.93071                | YES             | YES   |
| 21 |      | a        | 168.19                  | 0.28006                | YES             | YES   |
| 22 |      | a        | 171.57                  | 0.06476                | YES             | YES   |
| 23 |      | a        | 201.66                  | 2.28831                | YES             | YES   |
| 24 |      | a        | 221.68                  | 0.90382                | YES             | YES   |
| 25 |      | a        | 228.11                  | 0.13987                | YES             | YES   |
| 26 |      | a        | 240.12                  | 0.50932                | YES             | YES   |
| 27 |      | a        | 263.48                  | 0.36210                | YES             | YES   |
| 28 |      | a        | 281.08                  | 0.10385                | YES             | YES   |
| 29 |      | a        | 342.96                  | 0.25244                | YES             | YES   |
| 30 |      | a        | 356.62                  | 1.72735                | YES             | YES   |
| 31 |      | a        | 407.65                  | 3.82895                | YES             | YES   |
| 32 |      | a        | 413.53                  | 1.94417                | YES             | YES   |
| 33 |      | a        | 420.48                  | 4.32053                | YES             | YES   |
| 34 |      | a        | 430.59                  | 1.93295                | YES             | YES   |
| 35 |      | a        | 441.75                  | 1.74368                | YES             | YES   |
| 36 |      | a        | 460.81                  | 2.24741                | YES             | YES   |
| 37 |      | a        | 463.86                  | 0.83593                | YES             | YES   |
| 38 |      | a        | 483.58                  | 1.45069                | YES             | YES   |
| 39 |      | a        | 486.62                  | 1.58686                | YES             | YES   |
| 40 |      | a        | 495.34                  | 0.90332                | YES             | YES   |
| 41 |      | a        | 501.19                  | 0.27970                | YES             | YES   |
| 42 |      | a        | 520.05                  | 2.89286                | YES             | YES   |
| 43 |      | a        | 523.61                  | 6.81593                | YES             | YES   |
| 44 |      | a        | 539.03                  | 12.66528               | YES             | YES   |
| 45 |      | a        | 548.96                  | 4.06695                | YES             | YES   |
| 46 |      | a        | 559.92                  | 3.76532                | YES             | YES   |
| 47 |      | a        | 587.65                  | 7.96722                | YES             | YES   |
| 48 |      | a        | 609.87                  | 30.76435               | YES             | YES   |
| 49 |      | a        | 621.24                  | 4.29310                | YES             | YES   |
| 50 |      | a        | 627.98                  | 39.61848               | YES             | YES   |

**TS<sub>23bd</sub>**

|                                            |                                       |
|--------------------------------------------|---------------------------------------|
| SCF Energy (au) BP86/SV(P)                 | -2411.377999102                       |
| SCF Energy (au) PBE0/def2-TZVPP            | -2410.917172120                       |
| SCF Energy (au) PBE0/def2-TZVPP            | -2410.9254826611 (Toluene Correction) |
| Zero Point Energy (au)                     | 0.3599214                             |
| Chemical Potential (kJ mol <sup>-1</sup> ) | 787.62                                |
| Dispersion Correction (au) PBE0/def2-TZVPP | -0.06897874                           |

## xyz coordinates

49

|    |            |            |            |
|----|------------|------------|------------|
| Mn | 1.6834630  | -0.0525723 | 1.9499502  |
| C  | 2.0090554  | 0.2577901  | 3.6992573  |
| C  | 3.3713646  | -0.5845235 | 1.6926125  |
| C  | 2.1363629  | 1.6313506  | 1.4813795  |
| O  | 2.4693042  | 2.7221616  | 1.2212537  |
| O  | 4.4707655  | -0.9441518 | 1.5293227  |
| O  | 2.2100084  | 0.4495467  | 4.8302512  |
| C  | -1.1470986 | -0.5976926 | 2.7197754  |
| C  | -0.9324977 | 1.5925442  | 1.9007414  |
| C  | -2.2982368 | 1.8471218  | 2.0506641  |
| C  | -3.1213617 | 0.8185427  | 2.5459622  |
| C  | -2.5420504 | -0.4077008 | 2.8750646  |
| C  | -0.4262491 | -1.8243502 | 3.0472378  |
| C  | 0.9386815  | -1.8829973 | 2.6156958  |
| C  | 1.6931261  | -3.0281449 | 2.9933610  |
| C  | 1.1210401  | -4.0697105 | 3.7279511  |
| C  | -0.2386122 | -4.0167145 | 4.1126819  |
| C  | -1.0019301 | -2.8981569 | 3.7716426  |
| H  | -0.2574610 | 2.3661431  | 1.5045454  |
| H  | -2.7036819 | 2.8331761  | 1.7769299  |
| H  | -4.2059321 | 0.9735543  | 2.6683121  |
| H  | -3.1647403 | -1.2331882 | 3.2502307  |
| H  | 2.7509778  | -3.1042007 | 2.6890843  |
| H  | 1.7393524  | -4.9380311 | 4.0129915  |
| H  | -0.6882753 | -4.8412553 | 4.6890756  |
| H  | -2.0532278 | -2.8431750 | 4.0993318  |
| N  | -0.3619388 | 0.4102460  | 2.2236019  |
| C  | 0.5722182  | 0.1518922  | -1.2459288 |
| C  | 1.1001983  | 1.3866554  | -1.7046310 |
| C  | 0.7455663  | 1.9262172  | -2.9429411 |
| C  | -0.1863450 | 1.2707796  | -3.8004005 |
| C  | -0.7356187 | 0.0382648  | -3.3340738 |
| C  | -0.3620324 | -0.4981225 | -2.1018884 |
| H  | 1.8215642  | 1.9339246  | -1.0809394 |
| H  | 1.2023613  | 2.8797746  | -3.2433579 |
| N  | -0.5456798 | 1.8075638  | -5.0264299 |
| H  | -1.4654832 | -0.5137298 | -3.9434549 |
| H  | -0.8068323 | -1.4520759 | -1.7746075 |
| C  | 0.9425459  | -0.4725647 | -0.0024645 |
| C  | 1.0810974  | -1.5992534 | 0.6214019  |
| H  | 1.3031505  | -2.6483348 | 0.4068866  |
| C  | -1.4962568 | 1.1107966  | -5.8746984 |
| C  | 0.0455147  | 3.0575437  | -5.4719449 |
| H  | -0.1894395 | 3.9030832  | -4.7811889 |
| H  | -0.3548213 | 3.3171793  | -6.4718110 |
| H  | 1.1569677  | 2.9896755  | -5.5569684 |
| H  | -1.1337429 | 0.0962807  | -6.1692087 |
| H  | -1.6569254 | 1.6947161  | -6.8027670 |
| H  | -2.4882151 | 0.9841219  | -5.3774916 |



\$vibrational spectrum

| #  | mode | symmetry | wave number<br>cm**(-1) | IR intensity<br>km/mol | selection rules |       |
|----|------|----------|-------------------------|------------------------|-----------------|-------|
| #  |      |          |                         |                        | IR              | RAMAN |
| 1  |      | a        | -232.90                 | 0.00000                | YES             | YES   |
| 2  |      |          | 0.00                    | 0.00000                | -               | -     |
| 3  |      |          | 0.00                    | 0.00000                | -               | -     |
| 4  |      |          | 0.00                    | 0.00000                | -               | -     |
| 5  |      |          | 0.00                    | 0.00000                | -               | -     |
| 6  |      |          | 0.00                    | 0.00000                | -               | -     |
| 7  |      |          | 0.00                    | 0.00000                | -               | -     |
| 8  |      | a        | 17.63                   | 0.42854                | YES             | YES   |
| 9  |      | a        | 23.50                   | 0.02888                | YES             | YES   |
| 10 |      | a        | 39.27                   | 0.17692                | YES             | YES   |
| 11 |      | a        | 52.61                   | 0.70633                | YES             | YES   |
| 12 |      | a        | 60.93                   | 0.75764                | YES             | YES   |
| 13 |      | a        | 69.86                   | 0.00642                | YES             | YES   |
| 14 |      | a        | 73.50                   | 0.05396                | YES             | YES   |
| 15 |      | a        | 79.07                   | 0.32040                | YES             | YES   |
| 16 |      | a        | 87.05                   | 0.20507                | YES             | YES   |
| 17 |      | a        | 91.02                   | 0.05740                | YES             | YES   |
| 18 |      | a        | 93.52                   | 1.26300                | YES             | YES   |
| 19 |      | a        | 102.25                  | 0.54171                | YES             | YES   |
| 20 |      | a        | 109.71                  | 0.09419                | YES             | YES   |
| 21 |      | a        | 113.69                  | 0.14201                | YES             | YES   |
| 22 |      | a        | 133.88                  | 0.09814                | YES             | YES   |
| 23 |      | a        | 172.62                  | 0.27658                | YES             | YES   |
| 24 |      | a        | 173.33                  | 0.33520                | YES             | YES   |
| 25 |      | a        | 192.99                  | 0.53918                | YES             | YES   |
| 26 |      | a        | 203.92                  | 0.52000                | YES             | YES   |
| 27 |      | a        | 211.52                  | 0.00193                | YES             | YES   |
| 28 |      | a        | 232.77                  | 1.06116                | YES             | YES   |
| 29 |      | a        | 249.78                  | 0.59980                | YES             | YES   |
| 30 |      | a        | 259.75                  | 0.23298                | YES             | YES   |
| 31 |      | a        | 279.20                  | 0.33588                | YES             | YES   |
| 32 |      | a        | 294.51                  | 4.85642                | YES             | YES   |
| 33 |      | a        | 341.09                  | 0.32281                | YES             | YES   |
| 34 |      | a        | 358.51                  | 3.22369                | YES             | YES   |
| 35 |      | a        | 396.61                  | 1.95742                | YES             | YES   |
| 36 |      | a        | 412.41                  | 1.72339                | YES             | YES   |
| 37 |      | a        | 419.20                  | 0.32576                | YES             | YES   |
| 38 |      | a        | 428.07                  | 21.42381               | YES             | YES   |
| 39 |      | a        | 434.00                  | 1.48273                | YES             | YES   |
| 40 |      | a        | 443.83                  | 5.47313                | YES             | YES   |
| 41 |      | a        | 459.17                  | 0.37495                | YES             | YES   |
| 42 |      | a        | 467.34                  | 6.59154                | YES             | YES   |
| 43 |      | a        | 473.89                  | 0.79606                | YES             | YES   |
| 44 |      | a        | 481.82                  | 2.47340                | YES             | YES   |
| 45 |      | a        | 494.42                  | 3.20775                | YES             | YES   |
| 46 |      | a        | 502.22                  | 4.26468                | YES             | YES   |
| 47 |      | a        | 507.05                  | 10.25813               | YES             | YES   |
| 48 |      | a        | 526.69                  | 7.26318                | YES             | YES   |
| 49 |      | a        | 543.84                  | 16.93748               | YES             | YES   |
| 50 |      | a        | 545.01                  | 27.45832               | YES             | YES   |

**TS<sub>23bd</sub>'**

|                                            |                                       |
|--------------------------------------------|---------------------------------------|
| SCF Energy (au) BP86/SV(P)                 | -2411.368746066                       |
| SCF Energy (au) PBE0/def2-TZVPP            | -2410.909311614                       |
| SCF Energy (au) PBE0/def2-TZVPP            | -2410.9178265345 (Toluene Correction) |
| Zero Point Energy (au)                     | 0.3597223                             |
| Chemical Potential (kJ mol <sup>-1</sup> ) | 787.33                                |
| Dispersion Correction (au) PBE0/def2-TZVPP | -0.07129753                           |

xyz coordinates

49

|    |            |            |            |
|----|------------|------------|------------|
| Mn | 0.8765013  | 2.7963850  | 0.9256197  |
| C  | 0.9665915  | 3.2424892  | 2.6802605  |
| C  | 2.6063238  | 2.3530971  | 0.9199746  |
| C  | 1.2790913  | 4.4416824  | 0.3257752  |
| O  | 1.5517344  | 5.4917965  | -0.1099508 |
| O  | 3.7367907  | 2.0547615  | 0.9224713  |
| O  | 1.0198641  | 3.5439671  | 3.8052743  |
| C  | -1.9912887 | 2.1018574  | 1.3960254  |
| C  | -1.8177428 | 4.2754438  | 0.5328868  |
| C  | -3.2051678 | 4.4498593  | 0.5301760  |
| C  | -4.0151754 | 3.3853344  | 0.9656546  |
| C  | -3.4030226 | 2.2059291  | 1.3950251  |
| C  | -1.2377681 | 0.9352140  | 1.8589081  |
| C  | 0.1509035  | 0.9026020  | 1.5138263  |
| C  | 0.9280650  | -0.1658238 | 2.0340893  |
| C  | 0.3691824  | -1.1376972 | 2.8695596  |
| C  | -1.0078131 | -1.1055827 | 3.1834053  |
| C  | -1.8056209 | -0.0770676 | 2.6726767  |
| H  | -1.1489615 | 5.0789482  | 0.1874558  |
| H  | -3.6362272 | 5.4026418  | 0.1861606  |
| H  | -5.1138208 | 3.4754524  | 0.9651434  |
| H  | -4.0118098 | 1.3510936  | 1.7253487  |
| H  | 1.9974218  | -0.2319363 | 1.7741643  |
| H  | 1.0090422  | -1.9362397 | 3.2817040  |
| H  | -1.4492273 | -1.8762165 | 3.8362410  |
| H  | -2.8727223 | -0.0335685 | 2.9468625  |
| N  | -1.2177181 | 3.1397826  | 0.9516331  |
| H  | 0.4686035  | 2.7499073  | -1.9910079 |
| C  | 0.4881411  | 2.2803288  | -1.0018763 |
| C  | 0.4290407  | 1.0882186  | -0.4932435 |
| C  | 0.6288202  | -0.2901795 | -0.9466634 |
| C  | 1.0131190  | -2.9201236 | -2.0568575 |
| C  | 1.9062441  | -1.8495803 | -2.3563812 |
| C  | 1.7108367  | -0.5755514 | -1.8163986 |
| C  | -0.2496384 | -1.3560608 | -0.6375642 |
| C  | -0.0745392 | -2.6310950 | -1.1787563 |
| N  | 1.1945533  | -4.1852326 | -2.5914633 |
| H  | 2.7696160  | -2.0099100 | -3.0174565 |
| H  | 2.4214364  | 0.2297555  | -2.0624777 |
| H  | -1.1022642 | -1.1757743 | 0.0361319  |
| H  | -0.7974877 | -3.4146339 | -0.9115329 |
| C  | 0.2833252  | -5.2604066 | -2.2400371 |
| C  | 2.3290919  | -4.4509679 | -3.4588670 |
| H  | 3.3052120  | -4.2826688 | -2.9419781 |
| H  | 2.3149097  | -3.8095463 | -4.3723163 |
| H  | 2.2986772  | -5.5081616 | -3.7892528 |
| H  | -0.7685960 | -5.0289145 | -2.5330402 |
| H  | 0.2886267  | -5.4784424 | -1.1443368 |
| H  | 0.5848459  | -6.1851661 | -2.7709959 |

\$vibrational spectrum

| #  | mode | symmetry | wave number<br>cm**(-1) | IR intensity<br>km/mol | selection rules |       |
|----|------|----------|-------------------------|------------------------|-----------------|-------|
| #  |      |          |                         |                        | IR              | RAMAN |
| 1  |      | a        | -281.14                 | 0.00000                | YES             | YES   |
| 2  |      |          | 0.00                    | 0.00000                | -               | -     |
| 3  |      |          | 0.00                    | 0.00000                | -               | -     |
| 4  |      |          | 0.00                    | 0.00000                | -               | -     |
| 5  |      |          | 0.00                    | 0.00000                | -               | -     |
| 6  |      |          | 0.00                    | 0.00000                | -               | -     |
| 7  |      |          | 0.00                    | 0.00000                | -               | -     |
| 8  |      | a        | 20.19                   | 0.87179                | YES             | YES   |
| 9  |      | a        | 27.26                   | 0.34281                | YES             | YES   |
| 10 |      | a        | 38.91                   | 0.12241                | YES             | YES   |
| 11 |      | a        | 48.94                   | 0.33750                | YES             | YES   |
| 12 |      | a        | 62.05                   | 0.55669                | YES             | YES   |
| 13 |      | a        | 65.23                   | 0.13583                | YES             | YES   |
| 14 |      | a        | 73.20                   | 0.38913                | YES             | YES   |
| 15 |      | a        | 80.39                   | 0.02581                | YES             | YES   |
| 16 |      | a        | 83.34                   | 0.07330                | YES             | YES   |
| 17 |      | a        | 89.03                   | 0.82535                | YES             | YES   |
| 18 |      | a        | 98.01                   | 0.35279                | YES             | YES   |
| 19 |      | a        | 103.39                  | 0.62865                | YES             | YES   |
| 20 |      | a        | 103.76                  | 0.08370                | YES             | YES   |
| 21 |      | a        | 128.54                  | 0.82791                | YES             | YES   |
| 22 |      | a        | 136.25                  | 0.50399                | YES             | YES   |
| 23 |      | a        | 151.00                  | 8.53754                | YES             | YES   |
| 24 |      | a        | 172.53                  | 1.79403                | YES             | YES   |
| 25 |      | a        | 173.86                  | 0.17583                | YES             | YES   |
| 26 |      | a        | 205.54                  | 2.72256                | YES             | YES   |
| 27 |      | a        | 208.09                  | 0.60019                | YES             | YES   |
| 28 |      | a        | 220.35                  | 1.63172                | YES             | YES   |
| 29 |      | a        | 243.30                  | 0.79741                | YES             | YES   |
| 30 |      | a        | 264.70                  | 1.09374                | YES             | YES   |
| 31 |      | a        | 280.06                  | 1.21745                | YES             | YES   |
| 32 |      | a        | 283.52                  | 4.52251                | YES             | YES   |
| 33 |      | a        | 355.23                  | 1.65612                | YES             | YES   |
| 34 |      | a        | 368.43                  | 10.41136               | YES             | YES   |
| 35 |      | a        | 371.16                  | 17.81186               | YES             | YES   |
| 36 |      | a        | 409.54                  | 9.00014                | YES             | YES   |
| 37 |      | a        | 420.83                  | 0.00760                | YES             | YES   |
| 38 |      | a        | 432.92                  | 1.90686                | YES             | YES   |
| 39 |      | a        | 448.63                  | 5.06107                | YES             | YES   |
| 40 |      | a        | 458.25                  | 0.05615                | YES             | YES   |
| 41 |      | a        | 464.84                  | 0.40177                | YES             | YES   |
| 42 |      | a        | 476.00                  | 5.71754                | YES             | YES   |
| 43 |      | a        | 482.29                  | 1.90114                | YES             | YES   |
| 44 |      | a        | 493.30                  | 1.86918                | YES             | YES   |
| 45 |      | a        | 498.67                  | 1.51402                | YES             | YES   |
| 46 |      | a        | 505.43                  | 25.56968               | YES             | YES   |
| 47 |      | a        | 512.67                  | 8.91216                | YES             | YES   |
| 48 |      | a        | 534.45                  | 2.22502                | YES             | YES   |
| 49 |      | a        | 538.22                  | 10.33803               | YES             | YES   |
| 50 |      | a        | 548.54                  | 5.78802                | YES             | YES   |

**TS<sub>23be</sub>'**

SCF Energy (au) BP86/SV(P) -2391.942812015  
 SCF Energy (au) PBE0/def2-TZVPP -2391.495806536  
 SCF Energy (au) PBE0/def2-TZVPP -2391.5041329799 (Toluene Correction)  
 Zero Point Energy (au) 0.3207053  
 Chemical Potential (kJ mol<sup>-1</sup>) 692.34  
 Dispersion Correction (au) PBE0/def2-TZVPP -0.06659232

xyz coordinates

45

|    |            |            |            |
|----|------------|------------|------------|
| Mn | 0.8603316  | 2.3382340  | 0.6760216  |
| C  | 0.9379708  | 2.8134409  | 2.4240064  |
| C  | 2.5972322  | 1.9219831  | 0.6837214  |
| C  | 1.2383753  | 3.9807492  | 0.0509475  |
| O  | 1.4943236  | 5.0284896  | -0.3993022 |
| O  | 3.7314917  | 1.6393026  | 0.6929300  |
| O  | 0.9821245  | 3.1300685  | 3.5447706  |
| C  | -2.0001052 | 1.6116006  | 1.1448314  |
| C  | -1.8528766 | 3.7743982  | 0.2505319  |
| C  | -3.2426123 | 3.9286207  | 0.2380344  |
| C  | -4.0396691 | 2.8590150  | 0.6846638  |
| C  | -3.4130628 | 1.6950717  | 1.1349044  |
| C  | -1.2323193 | 0.4638250  | 1.6312906  |
| C  | 0.1593725  | 0.4460522  | 1.2975217  |
| C  | 0.9491070  | -0.6005383 | 1.8421360  |
| C  | 0.3982303  | -1.5675800 | 2.6885341  |
| C  | -0.9812609 | -1.5513558 | 2.9909768  |
| C  | -1.7903207 | -0.5429819 | 2.4581476  |
| H  | -1.1942219 | 4.5826265  | -0.1032778 |
| H  | -3.6853800 | 4.8699977  | -0.1221602 |
| H  | -5.1394155 | 2.9332059  | 0.6768765  |
| H  | -4.0114237 | 0.8367251  | 1.4749357  |
| H  | 2.0217462  | -0.6538559 | 1.5932197  |
| H  | 1.0465926  | -2.3497724 | 3.1180270  |
| H  | -1.4162982 | -2.3185221 | 3.6519113  |
| H  | -2.8597754 | -0.5109985 | 2.7242278  |
| N  | -1.2390138 | 2.6535486  | 0.6889858  |
| H  | 0.4719437  | 2.2253396  | -2.2449167 |
| C  | 0.4880967  | 1.7815788  | -1.2440234 |
| C  | 0.4524668  | 0.6049359  | -0.6992029 |
| C  | 0.6761080  | -0.7825776 | -1.1266604 |
| C  | 1.1038637  | -3.3947654 | -2.1684267 |
| C  | 2.0076121  | -2.3538623 | -2.4722466 |
| C  | 1.7857646  | -1.0670649 | -1.9553061 |
| C  | -0.2132866 | -1.8444932 | -0.8212391 |
| C  | -0.0108466 | -3.1234504 | -1.3391414 |
| O  | 1.2167345  | -4.6758329 | -2.6162467 |
| H  | 2.8885494  | -2.5306660 | -3.1066706 |
| H  | 2.4962790  | -0.2586425 | -2.1904050 |
| H  | -1.0849297 | -1.6524542 | -0.1762487 |
| H  | -0.7078168 | -3.9463402 | -1.1155303 |
| C  | 2.3137170  | -5.0144689 | -3.4480481 |
| H  | 2.1995729  | -6.0916702 | -3.6844566 |
| H  | 3.2895722  | -4.8568574 | -2.9300167 |
| H  | 2.3074563  | -4.4300586 | -4.3986280 |

\$vibrational spectrum

| # | mode | symmetry | wave number | IR intensity | selection rules |
|---|------|----------|-------------|--------------|-----------------|
| # |      |          | cm**(-1)    | km/mol       | IR RAMAN        |
| 1 |      | a        | -282.68     | 0.00000      | YES YES         |
| 2 |      |          | 0.00        | 0.00000      | - -             |
| 3 |      |          | 0.00        | 0.00000      | - -             |

|    |   |        |          |     |     |
|----|---|--------|----------|-----|-----|
| 4  |   | 0.00   | 0.00000  | -   | -   |
| 5  |   | 0.00   | 0.00000  | -   | -   |
| 6  |   | 0.00   | 0.00000  | -   | -   |
| 7  |   | 0.00   | 0.00000  | -   | -   |
| 8  | a | 20.94  | 0.84604  | YES | YES |
| 9  | a | 29.19  | 0.79127  | YES | YES |
| 10 | a | 45.47  | 0.13936  | YES | YES |
| 11 | a | 54.95  | 0.03365  | YES | YES |
| 12 | a | 65.46  | 0.30469  | YES | YES |
| 13 | a | 69.54  | 0.04339  | YES | YES |
| 14 | a | 82.63  | 0.10799  | YES | YES |
| 15 | a | 89.06  | 0.48148  | YES | YES |
| 16 | a | 96.18  | 0.65098  | YES | YES |
| 17 | a | 100.10 | 0.89539  | YES | YES |
| 18 | a | 104.29 | 0.41734  | YES | YES |
| 19 | a | 119.76 | 1.61318  | YES | YES |
| 20 | a | 133.23 | 0.66472  | YES | YES |
| 21 | a | 151.62 | 0.52672  | YES | YES |
| 22 | a | 160.18 | 5.85576  | YES | YES |
| 23 | a | 176.79 | 0.15200  | YES | YES |
| 24 | a | 190.84 | 1.83338  | YES | YES |
| 25 | a | 217.29 | 0.68853  | YES | YES |
| 26 | a | 229.68 | 2.61832  | YES | YES |
| 27 | a | 245.29 | 0.45810  | YES | YES |
| 28 | a | 266.00 | 0.50973  | YES | YES |
| 29 | a | 274.25 | 4.73900  | YES | YES |
| 30 | a | 282.77 | 0.36243  | YES | YES |
| 31 | a | 356.37 | 1.42389  | YES | YES |
| 32 | a | 367.34 | 4.02929  | YES | YES |
| 33 | a | 410.21 | 3.71430  | YES | YES |
| 34 | a | 411.57 | 16.17621 | YES | YES |
| 35 | a | 414.46 | 0.20458  | YES | YES |
| 36 | a | 433.24 | 4.05431  | YES | YES |
| 37 | a | 447.79 | 3.75264  | YES | YES |
| 38 | a | 461.59 | 0.27501  | YES | YES |
| 39 | a | 476.88 | 7.40511  | YES | YES |
| 40 | a | 481.37 | 0.22403  | YES | YES |
| 41 | a | 490.38 | 1.44038  | YES | YES |
| 42 | a | 496.63 | 4.12182  | YES | YES |
| 43 | a | 503.13 | 10.48972 | YES | YES |
| 44 | a | 521.41 | 27.61373 | YES | YES |
| 45 | a | 533.34 | 2.49739  | YES | YES |
| 46 | a | 537.21 | 9.83007  | YES | YES |
| 47 | a | 546.83 | 10.77086 | YES | YES |
| 48 | a | 552.96 | 7.48015  | YES | YES |
| 49 | a | 559.28 | 19.86247 | YES | YES |
| 50 | a | 608.71 | 41.44731 | YES | YES |

**TS<sub>23be</sub>**

SCF Energy (au) BP86/SV(P) -2391.952065529  
 SCF Energy (au) PBE0/def2-TZVPP -2391.503796793  
 SCF Energy (au) PBE0/def2-TZVPP -2391.5119222258 (Toluene Correction)  
 Zero Point Energy (au) 0.3209337  
 Chemical Potential (kJ mol<sup>-1</sup>) 692.54  
 Dispersion Correction (au) PBE0/def2-TZVPP -0.06432154

xyz coordinates

45

|    |            |            |            |
|----|------------|------------|------------|
| Mn | 0.8621936  | -1.7437725 | 0.7912015  |
| C  | 2.0691026  | -2.3221484 | 2.0057398  |
| C  | 0.3354707  | -3.4232205 | 0.4714875  |
| C  | 2.0477510  | -1.8564604 | -0.5663307 |
| O  | 2.8360809  | -1.9745973 | -1.4217577 |
| O  | -0.0127487 | -4.5200114 | 0.2724205  |
| O  | 2.8389768  | -2.6915675 | 2.7970921  |
| C  | 0.7186338  | 0.8031975  | 2.3400358  |
| C  | 2.1364778  | 1.0577432  | 0.4858988  |
| C  | 2.3787566  | 2.4023179  | 0.7796241  |
| C  | 1.7428917  | 2.9688187  | 1.8998988  |
| C  | 0.9075607  | 2.1655473  | 2.6776365  |
| C  | -0.1123756 | -0.1382387 | 3.0862403  |
| C  | -0.3468487 | -1.4032020 | 2.4575729  |
| C  | -1.0799262 | -2.3732746 | 3.1945911  |
| C  | -1.5781318 | -2.0972743 | 4.4704671  |
| C  | -1.3719378 | -0.8308322 | 5.0635798  |
| C  | -0.6428491 | 0.1382771  | 4.3711397  |
| H  | 2.6030517  | 0.5818446  | -0.3898668 |
| H  | 3.0483642  | 2.9911698  | 0.1341671  |
| H  | 1.8951081  | 4.0295186  | 2.1584286  |
| H  | 0.3867636  | 2.5872098  | 3.5498997  |
| H  | -1.2721714 | -3.3628597 | 2.7460214  |
| H  | -2.1328733 | -2.8773296 | 5.0191101  |
| H  | -1.7684895 | -0.6134081 | 6.0684463  |
| H  | -0.4549848 | 1.1142585  | 4.8487020  |
| N  | 1.3329404  | 0.2712019  | 1.2367404  |
| C  | -0.7281873 | -0.0773813 | -1.6978335 |
| C  | 0.0682062  | -0.3445665 | -2.8377042 |
| C  | -0.1602890 | 0.2987836  | -4.0637801 |
| C  | -1.1912045 | 1.2563263  | -4.1786851 |
| C  | -1.9875578 | 1.5500737  | -3.0454890 |
| C  | -1.7625880 | 0.8964494  | -1.8360872 |
| H  | 0.8807869  | -1.0823544 | -2.7715149 |
| H  | 0.4793908  | 0.0469182  | -4.9224714 |
| O  | -1.4906495 | 1.9459369  | -5.3146853 |
| H  | -2.7851059 | 2.3030503  | -3.1476681 |
| H  | -2.3898731 | 1.1356930  | -0.9621762 |
| C  | -0.5628082 | -0.7472342 | -0.4310331 |
| C  | -1.1738842 | -1.1609112 | 0.6325697  |
| H  | -2.1688995 | -1.4811356 | 0.9544857  |
| C  | -0.7396093 | 1.6854028  | -6.4882063 |
| H  | -1.1636778 | 2.3394228  | -7.2766994 |
| H  | -0.8310382 | 0.6206259  | -6.8093990 |
| H  | 0.3402008  | 1.9319926  | -6.3518091 |

\$vibrational spectrum

| # | mode | symmetry | wave number | IR intensity | selection rules |
|---|------|----------|-------------|--------------|-----------------|
| # |      |          | cm**(-1)    | km/mol       | IR RAMAN        |
|   | 1    | a        | -227.33     | 0.00000      | YES YES         |
|   | 2    |          | 0.00        | 0.00000      | - -             |
|   | 3    |          | 0.00        | 0.00000      | - -             |

|    |   |        |          |     |     |
|----|---|--------|----------|-----|-----|
| 4  |   | 0.00   | 0.00000  | -   | -   |
| 5  |   | 0.00   | 0.00000  | -   | -   |
| 6  |   | 0.00   | 0.00000  | -   | -   |
| 7  |   | 0.00   | 0.00000  | -   | -   |
| 8  | a | 19.41  | 0.41189  | YES | YES |
| 9  | a | 27.78  | 0.54285  | YES | YES |
| 10 | a | 40.10  | 0.12463  | YES | YES |
| 11 | a | 54.50  | 0.43267  | YES | YES |
| 12 | a | 67.65  | 0.31805  | YES | YES |
| 13 | a | 70.24  | 0.07862  | YES | YES |
| 14 | a | 86.69  | 0.50336  | YES | YES |
| 15 | a | 90.08  | 0.47264  | YES | YES |
| 16 | a | 91.94  | 1.11787  | YES | YES |
| 17 | a | 100.97 | 0.83703  | YES | YES |
| 18 | a | 109.03 | 0.03787  | YES | YES |
| 19 | a | 113.63 | 0.02923  | YES | YES |
| 20 | a | 123.87 | 0.95877  | YES | YES |
| 21 | a | 148.01 | 0.67670  | YES | YES |
| 22 | a | 176.03 | 0.53732  | YES | YES |
| 23 | a | 181.06 | 1.33249  | YES | YES |
| 24 | a | 202.81 | 0.52002  | YES | YES |
| 25 | a | 232.05 | 0.65903  | YES | YES |
| 26 | a | 233.23 | 0.92839  | YES | YES |
| 27 | a | 249.69 | 3.09180  | YES | YES |
| 28 | a | 259.35 | 0.42038  | YES | YES |
| 29 | a | 278.91 | 0.18843  | YES | YES |
| 30 | a | 287.88 | 3.04993  | YES | YES |
| 31 | a | 357.46 | 1.85353  | YES | YES |
| 32 | a | 367.87 | 5.71411  | YES | YES |
| 33 | a | 404.64 | 1.03540  | YES | YES |
| 34 | a | 413.15 | 1.34921  | YES | YES |
| 35 | a | 422.17 | 1.05395  | YES | YES |
| 36 | a | 428.34 | 9.27362  | YES | YES |
| 37 | a | 438.19 | 0.18566  | YES | YES |
| 38 | a | 449.62 | 3.72182  | YES | YES |
| 39 | a | 461.50 | 0.42404  | YES | YES |
| 40 | a | 472.12 | 2.83535  | YES | YES |
| 41 | a | 479.94 | 1.51383  | YES | YES |
| 42 | a | 486.82 | 0.41372  | YES | YES |
| 43 | a | 498.30 | 1.84853  | YES | YES |
| 44 | a | 507.44 | 9.78614  | YES | YES |
| 45 | a | 529.46 | 6.30823  | YES | YES |
| 46 | a | 544.91 | 28.96894 | YES | YES |
| 47 | a | 545.21 | 18.42229 | YES | YES |
| 48 | a | 553.60 | 0.31762  | YES | YES |
| 49 | a | 568.43 | 45.03624 | YES | YES |
| 50 | a | 610.58 | 21.48888 | YES | YES |

**TS<sub>23bf</sub>**

SCF Energy (au) BP86/SV(P) -2376.678364254  
SCF Energy (au) PBE0/def2-TZVPP -2376.251797975  
SCF Energy (au) PBE0/def2-TZVPP -2376.2588756073 (Toluene Correction)  
Zero Point Energy (au) 0.2815138  
Chemical Potential (kJ mol<sup>-1</sup>) 593.78  
Dispersion Correction (au) PBE0/def2-TZVPP -0.06085022

xyz coordinates

41

|    |            |            |            |
|----|------------|------------|------------|
| Mn | 1.5619780  | 0.3660655  | 0.7861690  |
| C  | 1.9208386  | 0.6208485  | 2.5404651  |
| C  | 3.2541360  | -0.1276676 | 0.4770720  |
| C  | 1.9785849  | 2.0697894  | 0.3569203  |
| O  | 2.2835054  | 3.1695638  | 0.1046869  |
| O  | 4.3562761  | -0.4595864 | 0.2814469  |
| O  | 2.1400928  | 0.7768074  | 3.6726748  |
| C  | -1.2440467 | -0.2454675 | 1.5945022  |
| C  | -1.0702898 | 1.9843787  | 0.8796638  |
| C  | -2.4348486 | 2.2155314  | 1.0724391  |
| C  | -3.2360103 | 1.1542217  | 1.5324193  |
| C  | -2.6368801 | -0.0802472 | 1.7882012  |
| C  | -0.5011196 | -1.4767078 | 1.8553073  |
| C  | 0.8563183  | -1.5017281 | 1.4009004  |
| C  | 1.6332937  | -2.6484384 | 1.7196354  |
| C  | 1.0885552  | -3.7252870 | 2.4242352  |
| C  | -0.2647148 | -3.7051008 | 2.8323911  |
| C  | -1.0494699 | -2.5854594 | 2.5475681  |
| H  | -0.4127089 | 2.7847534  | 0.5080550  |
| H  | -2.8564114 | 3.2094672  | 0.8580455  |
| H  | -4.3190959 | 1.2907115  | 1.6852720  |
| H  | -3.2426676 | -0.9298586 | 2.1358996  |
| H  | 2.6853571  | -2.6982887 | 1.3913901  |
| H  | 1.7225618  | -4.5955856 | 2.6642926  |
| H  | -0.6941026 | -4.5576641 | 3.3827492  |
| H  | -2.0952652 | -2.5585120 | 2.8949469  |
| N  | -0.4812431 | 0.7936973  | 1.1302499  |
| C  | 0.3501391  | 0.6559185  | -2.3668529 |
| C  | 0.9112785  | 1.8710060  | -2.8413999 |
| C  | 0.4926697  | 2.4378441  | -4.0527881 |
| C  | -0.5125640 | 1.8032486  | -4.7954455 |
| C  | -1.1025882 | 0.6096096  | -4.3535508 |
| C  | -0.6698862 | 0.0429080  | -3.1497629 |
| H  | 1.6958594  | 2.3738398  | -2.2581371 |
| H  | 0.9341938  | 3.3739313  | -4.4286426 |
| F  | -0.9275114 | 2.3519564  | -5.9545333 |
| H  | -1.8929051 | 0.1390941  | -4.9592008 |
| H  | -1.1268168 | -0.8930985 | -2.7913662 |
| C  | 0.7735382  | 0.0070599  | -1.1487214 |
| C  | 0.9568754  | -1.1398979 | -0.5775206 |
| H  | 1.1704449  | -2.1796208 | -0.8418947 |

\$vibrational spectrum

| # | mode | symmetry | wave number<br>cm** (-1) | IR intensity<br>km/mol | selection rules<br>IR | RAMAN |
|---|------|----------|--------------------------|------------------------|-----------------------|-------|
| # |      |          |                          |                        |                       |       |
| 1 |      | a        | -227.53                  | 0.00000                | YES                   | YES   |
| 2 |      |          | 0.00                     | 0.00000                | -                     | -     |
| 3 |      |          | 0.00                     | 0.00000                | -                     | -     |
| 4 |      |          | 0.00                     | 0.00000                | -                     | -     |
| 5 |      |          | 0.00                     | 0.00000                | -                     | -     |
| 6 |      |          | 0.00                     | 0.00000                | -                     | -     |
| 7 |      |          | 0.00                     | 0.00000                | -                     | -     |



|    |   |        |          |     |     |
|----|---|--------|----------|-----|-----|
| 8  | a | 19.21  | 0.24348  | YES | YES |
| 9  | a | 23.75  | 0.12982  | YES | YES |
| 10 | a | 42.92  | 0.09885  | YES | YES |
| 11 | a | 56.70  | 0.11916  | YES | YES |
| 12 | a | 70.27  | 0.09686  | YES | YES |
| 13 | a | 76.59  | 0.08731  | YES | YES |
| 14 | a | 88.98  | 0.27995  | YES | YES |
| 15 | a | 92.03  | 0.96432  | YES | YES |
| 16 | a | 97.86  | 0.53452  | YES | YES |
| 17 | a | 108.76 | 0.12355  | YES | YES |
| 18 | a | 110.28 | 0.02049  | YES | YES |
| 19 | a | 116.73 | 0.06153  | YES | YES |
| 20 | a | 146.46 | 0.79840  | YES | YES |
| 21 | a | 177.78 | 0.27680  | YES | YES |
| 22 | a | 182.39 | 1.18811  | YES | YES |
| 23 | a | 205.49 | 1.46760  | YES | YES |
| 24 | a | 233.38 | 0.72356  | YES | YES |
| 25 | a | 258.43 | 0.38635  | YES | YES |
| 26 | a | 275.64 | 2.52772  | YES | YES |
| 27 | a | 278.75 | 0.07715  | YES | YES |
| 28 | a | 355.94 | 2.58164  | YES | YES |
| 29 | a | 363.22 | 3.60620  | YES | YES |
| 30 | a | 388.27 | 5.12682  | YES | YES |
| 31 | a | 406.29 | 2.57962  | YES | YES |
| 32 | a | 411.37 | 0.41426  | YES | YES |
| 33 | a | 423.31 | 3.72845  | YES | YES |
| 34 | a | 428.92 | 4.46412  | YES | YES |
| 35 | a | 445.07 | 0.06098  | YES | YES |
| 36 | a | 456.35 | 2.81889  | YES | YES |
| 37 | a | 466.29 | 6.63396  | YES | YES |
| 38 | a | 475.36 | 1.39436  | YES | YES |
| 39 | a | 486.90 | 0.50086  | YES | YES |
| 40 | a | 497.88 | 4.81588  | YES | YES |
| 41 | a | 504.43 | 12.18303 | YES | YES |
| 42 | a | 516.93 | 6.22702  | YES | YES |
| 43 | a | 540.83 | 14.84431 | YES | YES |
| 44 | a | 543.79 | 23.93456 | YES | YES |
| 45 | a | 553.24 | 0.35600  | YES | YES |
| 46 | a | 561.21 | 22.34925 | YES | YES |
| 47 | a | 611.02 | 24.09647 | YES | YES |
| 48 | a | 620.17 | 2.09154  | YES | YES |
| 49 | a | 623.93 | 31.33547 | YES | YES |
| 50 | a | 628.11 | 10.34672 | YES | YES |

**TS<sub>23bf'</sub>**

SCF Energy (au) BP86/SV(P) -2376.669021186  
 SCF Energy (au) PBE0/def2-TZVPP -2376.243801851  
 SCF Energy (au) PBE0/def2-TZVPP -2376.2510386261 (Toluene Correction)  
 Zero Point Energy (au) 0.2813228  
 Chemical Potential (kJ mol<sup>-1</sup>) 594.57  
 Dispersion Correction (au) PBE0/def2-TZVPP -0.06310967

xyz coordinates

41

|    |            |            |            |
|----|------------|------------|------------|
| Mn | 1.1679605  | 1.7937775  | 0.3566876  |
| C  | 1.3550067  | 2.1748786  | 2.1202758  |
| C  | 2.8948304  | 1.3467086  | 0.2513224  |
| C  | 1.5482691  | 3.4604883  | -0.2019107 |
| O  | 1.8028072  | 4.5246093  | -0.6113293 |
| O  | 4.0222238  | 1.0452474  | 0.1892069  |
| O  | 1.4715723  | 2.4296359  | 3.2510797  |
| C  | -1.6803990 | 1.1013854  | 0.9435919  |
| C  | -1.5330810 | 3.3042479  | 0.1537376  |
| C  | -2.9181923 | 3.4841053  | 0.2210215  |
| C  | -3.7138197 | 2.4080422  | 0.6542685  |
| C  | -3.0897143 | 1.2110733  | 1.0121351  |
| C  | -0.9131107 | -0.0848258 | 1.3288097  |
| C  | 0.4585613  | -0.1118585 | 0.9211469  |
| C  | 1.2528511  | -1.2010783 | 1.3662344  |
| C  | 0.7256611  | -2.2017573 | 2.1886064  |
| C  | -0.6352314 | -2.1751473 | 2.5649013  |
| C  | -1.4485718 | -1.1236896 | 2.1304586  |
| H  | -0.8768868 | 4.1173775  | -0.1931761 |
| H  | -3.3590507 | 4.4503817  | -0.0685604 |
| H  | -4.8107081 | 2.5029422  | 0.7075116  |
| H  | -3.6879218 | 0.3476784  | 1.3392749  |
| H  | 2.3096177  | -1.2610650 | 1.0582935  |
| H  | 1.3785562  | -3.0180279 | 2.5406817  |
| H  | -1.0517775 | -2.9678258 | 3.2072608  |
| H  | -2.5015099 | -1.0854712 | 2.4550728  |
| N  | -0.9214283 | 2.1511209  | 0.5024351  |
| H  | 0.6243956  | 1.8451641  | -2.5424786 |
| C  | 0.6810058  | 1.3514882  | -1.5667166 |
| C  | 0.6470050  | 0.1528502  | -1.0719944 |
| C  | 0.8050998  | -1.2154115 | -1.5896971 |
| C  | 1.1005693  | -3.7481923 | -2.7710760 |
| C  | 2.0104261  | -2.7337013 | -3.0964077 |
| C  | 1.8558790  | -1.4713673 | -2.5055919 |
| C  | -0.0902993 | -2.2668373 | -1.2791782 |
| C  | 0.0471259  | -3.5285723 | -1.8715097 |
| F  | 1.2421296  | -4.9643436 | -3.3325375 |
| H  | 2.8286622  | -2.9435393 | -3.8026004 |
| H  | 2.5658972  | -0.6638700 | -2.7434700 |
| H  | -0.9133767 | -2.0872068 | -0.5704353 |
| H  | -0.6510337 | -4.3494144 | -1.6453449 |

\$vibrational spectrum

| # | mode | symmetry | wave number<br>cm** (-1) | IR intensity<br>km/mol | selection rules<br>IR | RAMAN |
|---|------|----------|--------------------------|------------------------|-----------------------|-------|
| # |      |          |                          |                        | IR                    | RAMAN |
| 1 |      | a        | -281.12                  | 0.00000                | YES                   | YES   |
| 2 |      |          | 0.00                     | 0.00000                | -                     | -     |
| 3 |      |          | 0.00                     | 0.00000                | -                     | -     |
| 4 |      |          | 0.00                     | 0.00000                | -                     | -     |
| 5 |      |          | 0.00                     | 0.00000                | -                     | -     |
| 6 |      |          | 0.00                     | 0.00000                | -                     | -     |
| 7 |      |          | 0.00                     | 0.00000                | -                     | -     |

|    |   |        |          |     |     |
|----|---|--------|----------|-----|-----|
| 8  | a | 23.06  | 0.43019  | YES | YES |
| 9  | a | 33.28  | 0.22086  | YES | YES |
| 10 | a | 45.13  | 0.06902  | YES | YES |
| 11 | a | 57.85  | 0.03442  | YES | YES |
| 12 | a | 65.73  | 0.24950  | YES | YES |
| 13 | a | 74.52  | 0.20522  | YES | YES |
| 14 | a | 85.64  | 0.15124  | YES | YES |
| 15 | a | 90.27  | 0.39165  | YES | YES |
| 16 | a | 99.81  | 0.62535  | YES | YES |
| 17 | a | 104.52 | 0.34564  | YES | YES |
| 18 | a | 110.26 | 0.08384  | YES | YES |
| 19 | a | 136.48 | 0.24950  | YES | YES |
| 20 | a | 154.01 | 0.08206  | YES | YES |
| 21 | a | 167.10 | 3.25609  | YES | YES |
| 22 | a | 181.48 | 0.60014  | YES | YES |
| 23 | a | 205.28 | 1.40959  | YES | YES |
| 24 | a | 218.29 | 0.72221  | YES | YES |
| 25 | a | 245.32 | 1.21865  | YES | YES |
| 26 | a | 258.04 | 2.84291  | YES | YES |
| 27 | a | 281.62 | 0.30776  | YES | YES |
| 28 | a | 356.45 | 1.45448  | YES | YES |
| 29 | a | 359.88 | 1.62025  | YES | YES |
| 30 | a | 403.54 | 8.10795  | YES | YES |
| 31 | a | 412.41 | 1.13305  | YES | YES |
| 32 | a | 413.93 | 0.24644  | YES | YES |
| 33 | a | 430.46 | 0.39448  | YES | YES |
| 34 | a | 444.28 | 12.65374 | YES | YES |
| 35 | a | 449.03 | 11.34976 | YES | YES |
| 36 | a | 460.93 | 0.31257  | YES | YES |
| 37 | a | 478.37 | 8.32081  | YES | YES |
| 38 | a | 486.58 | 11.15331 | YES | YES |
| 39 | a | 492.15 | 10.15353 | YES | YES |
| 40 | a | 496.96 | 1.50645  | YES | YES |
| 41 | a | 507.24 | 2.14471  | YES | YES |
| 42 | a | 531.58 | 2.35931  | YES | YES |
| 43 | a | 536.44 | 13.07556 | YES | YES |
| 44 | a | 545.62 | 3.08104  | YES | YES |
| 45 | a | 552.27 | 11.54518 | YES | YES |
| 46 | a | 557.93 | 12.44836 | YES | YES |
| 47 | a | 607.80 | 42.28800 | YES | YES |
| 48 | a | 619.49 | 1.47328  | YES | YES |
| 49 | a | 624.35 | 37.81025 | YES | YES |
| 50 | a | 629.46 | 2.75821  | YES | YES |

**TS<sub>23bg</sub>**

SCF Energy (au) BP86/SV(P) -2614.321919435  
 SCF Energy (au) PBE0/def2-TZVPP -2613.938388064  
 SCF Energy (au) PBE0/def2-TZVPP -2613.9456534346 (Toluene Correction)  
 Zero Point Energy (au) 0.2938786  
 Chemical Potential (kJ mol<sup>-1</sup>) 609.72  
 Dispersion Correction (au) PBE0/def2-TZVPP -0.06429204

xyz coordinates

44

|    |            |            |            |
|----|------------|------------|------------|
| Mn | 1.6199261  | 0.1839127  | 1.2244550  |
| C  | 1.9703585  | 0.4585406  | 2.9778204  |
| C  | 3.3203503  | -0.2897316 | 0.9266841  |
| C  | 2.0127327  | 1.8912149  | 0.7828043  |
| O  | 2.2972423  | 2.9925574  | 0.5179697  |
| O  | 4.4275292  | -0.6078570 | 0.7384601  |
| O  | 2.1853940  | 0.6268440  | 4.1086720  |
| C  | -1.1792486 | -0.4538706 | 2.0373772  |
| C  | -1.0355679 | 1.7700997  | 1.2989351  |
| C  | -2.4029705 | 1.9850299  | 1.4916835  |
| C  | -3.1890964 | 0.9188300  | 1.9654244  |
| C  | -2.5732740 | -0.3050667 | 2.2331667  |
| C  | -0.4201235 | -1.6737136 | 2.3090137  |
| C  | 0.9355425  | -1.6886456 | 1.8509875  |
| C  | 1.7276002  | -2.8220221 | 2.1778069  |
| C  | 1.2003632  | -3.8950022 | 2.9016578  |
| C  | -0.1504308 | -3.8841555 | 3.3175383  |
| C  | -0.9510923 | -2.7789871 | 3.0201217  |
| H  | -0.3899306 | 2.5751603  | 0.9165658  |
| H  | -2.8381934 | 2.9706082  | 1.2663466  |
| H  | -4.2734418 | 1.0429133  | 2.1195822  |
| H  | -3.1670728 | -1.1587135 | 2.5914871  |
| H  | 2.7779030  | -2.8640172 | 1.8430276  |
| H  | 1.8459733  | -4.7541239 | 3.1503903  |
| H  | -0.5662476 | -4.7332208 | 3.8834527  |
| H  | -1.9950363 | -2.7600360 | 3.3732780  |
| N  | -0.4304319 | 0.5901520  | 1.5618163  |
| C  | 0.4252095  | 0.4646606  | -1.9214119 |
| C  | 1.0845783  | 1.6109801  | -2.4406344 |
| C  | 0.6668475  | 2.1973363  | -3.6394776 |
| C  | -0.4316259 | 1.6717741  | -4.3481923 |
| C  | -1.1054294 | 0.5431403  | -3.8415792 |
| C  | -0.6837424 | -0.0528002 | -2.6485551 |
| H  | 1.9388036  | 2.0406499  | -1.8981213 |
| H  | 1.1940743  | 3.0839041  | -4.0254955 |
| C  | -0.8489076 | 2.2954447  | -5.6585145 |
| H  | -1.9705211 | 0.1313201  | -4.3839526 |
| H  | -1.2180867 | -0.9313327 | -2.2533843 |
| C  | 0.8396665  | -0.1949227 | -0.7088548 |
| C  | 1.0375226  | -1.3347500 | -0.1287520 |
| H  | 1.2599484  | -2.3733239 | -0.3917808 |
| F  | -0.7199966 | 3.6466930  | -5.6358574 |
| F  | -2.1388102 | 2.0147342  | -5.9680578 |
| F  | -0.0882877 | 1.8497925  | -6.6939033 |

\$vibrational spectrum

| # | mode | symmetry | wave number | IR intensity | selection rules |
|---|------|----------|-------------|--------------|-----------------|
| # |      |          | cm**(-1)    | km/mol       | IR RAMAN        |
| 1 |      | a        | -221.56     | 0.00000      | YES YES         |
| 2 |      |          | 0.00        | 0.00000      | - -             |
| 3 |      |          | 0.00        | 0.00000      | - -             |
| 4 |      |          | 0.00        | 0.00000      | - -             |

|    |   |        |          |     |     |
|----|---|--------|----------|-----|-----|
| 5  |   | 0.00   | 0.00000  | -   | -   |
| 6  |   | 0.00   | 0.00000  | -   | -   |
| 7  |   | 0.00   | 0.00000  | -   | -   |
| 8  | a | 7.57   | 0.08787  | YES | YES |
| 9  | a | 12.70  | 0.02691  | YES | YES |
| 10 | a | 17.57  | 0.40150  | YES | YES |
| 11 | a | 39.40  | 0.11062  | YES | YES |
| 12 | a | 53.16  | 0.26578  | YES | YES |
| 13 | a | 64.57  | 0.09205  | YES | YES |
| 14 | a | 68.37  | 0.13503  | YES | YES |
| 15 | a | 84.86  | 0.30126  | YES | YES |
| 16 | a | 88.58  | 0.21602  | YES | YES |
| 17 | a | 90.97  | 0.86229  | YES | YES |
| 18 | a | 101.75 | 0.61090  | YES | YES |
| 19 | a | 107.00 | 0.11636  | YES | YES |
| 20 | a | 111.52 | 0.04179  | YES | YES |
| 21 | a | 123.67 | 0.39127  | YES | YES |
| 22 | a | 166.48 | 2.85398  | YES | YES |
| 23 | a | 169.78 | 0.80858  | YES | YES |
| 24 | a | 189.44 | 0.55734  | YES | YES |
| 25 | a | 197.50 | 1.45027  | YES | YES |
| 26 | a | 205.67 | 1.38839  | YES | YES |
| 27 | a | 234.18 | 0.76864  | YES | YES |
| 28 | a | 258.19 | 0.93481  | YES | YES |
| 29 | a | 278.23 | 0.21455  | YES | YES |
| 30 | a | 294.42 | 2.80403  | YES | YES |
| 31 | a | 333.91 | 12.63884 | YES | YES |
| 32 | a | 358.35 | 1.03901  | YES | YES |
| 33 | a | 383.65 | 2.02331  | YES | YES |
| 34 | a | 400.39 | 5.40651  | YES | YES |
| 35 | a | 402.37 | 1.56811  | YES | YES |
| 36 | a | 411.18 | 1.44785  | YES | YES |
| 37 | a | 426.61 | 12.14994 | YES | YES |
| 38 | a | 435.36 | 0.54616  | YES | YES |
| 39 | a | 455.25 | 4.11501  | YES | YES |
| 40 | a | 464.66 | 8.39488  | YES | YES |
| 41 | a | 466.98 | 0.81202  | YES | YES |
| 42 | a | 476.39 | 0.76004  | YES | YES |
| 43 | a | 492.10 | 1.01598  | YES | YES |
| 44 | a | 497.58 | 11.50701 | YES | YES |
| 45 | a | 502.37 | 4.21196  | YES | YES |
| 46 | a | 521.29 | 1.91749  | YES | YES |
| 47 | a | 542.49 | 12.24062 | YES | YES |
| 48 | a | 545.04 | 10.18632 | YES | YES |
| 49 | a | 553.10 | 1.46029  | YES | YES |
| 50 | a | 564.73 | 0.25262  | YES | YES |

**TS<sub>23bg</sub>'**

SCF Energy (au) BP86/SV(P) -2614.309477147  
 SCF Energy (au) PBE0/def2-TZVPP -2613.929233249  
 SCF Energy (au) PBE0/def2-TZVPP -2613.9365857123 (Toluene Correction)  
 Zero Point Energy (au) 0.2938482  
 Chemical Potential (kJ mol<sup>-1</sup>) 615.77  
 Dispersion Correction (au) PBE0/def2-TZVPP -0.06657179

xyz coordinates

44

|    |            |            |            |
|----|------------|------------|------------|
| Mn | 1.0446202  | 2.2196695  | 0.5499048  |
| C  | 1.1981552  | 2.6359065  | 2.3093251  |
| C  | 2.7832881  | 1.8101785  | 0.4800956  |
| C  | 1.3941553  | 3.8859223  | -0.0312781 |
| O  | 1.6281967  | 4.9485527  | -0.4553341 |
| O  | 3.9179773  | 1.5340174  | 0.4444023  |
| O  | 1.2902589  | 2.9124888  | 3.4368457  |
| C  | -1.7905760 | 1.4788949  | 1.1355548  |
| C  | -1.6847092 | 3.6702602  | 0.3070757  |
| C  | -3.0724214 | 3.8273872  | 0.3775804  |
| C  | -3.8472378 | 2.7460619  | 0.8344706  |
| C  | -3.2011110 | 1.5661279  | 1.2096823  |
| C  | -1.0016303 | 0.3123426  | 1.5382334  |
| C  | 0.3728925  | 0.3073319  | 1.1399938  |
| C  | 1.1861554  | -0.7613311 | 1.5995115  |
| C  | 0.6733319  | -1.7655737 | 2.4267004  |
| C  | -0.6892004 | -1.7600573 | 2.7968418  |
| C  | -1.5198851 | -0.7277174 | 2.3494605  |
| H  | -1.0442952 | 4.4890153  | -0.0557742 |
| H  | -3.5311239 | 4.7808319  | 0.0735908  |
| H  | -4.9451686 | 2.8235315  | 0.8929761  |
| H  | -3.7832541 | 0.6993749  | 1.5562845  |
| H  | 2.2456846  | -0.8032007 | 1.2981667  |
| H  | 1.3391203  | -2.5672179 | 2.7878006  |
| H  | -1.0941491 | -2.5549752 | 3.4437029  |
| H  | -2.5744458 | -0.7064679 | 2.6701195  |
| N  | -1.0519180 | 2.5341520  | 0.6732917  |
| H  | 0.5631348  | 2.2112433  | -2.3631115 |
| C  | 0.6037548  | 1.7379934  | -1.3765606 |
| C  | 0.5771495  | 0.5524922  | -0.8521550 |
| C  | 0.7362246  | -0.8300358 | -1.3363065 |
| C  | 1.0549481  | -3.4210172 | -2.4309260 |
| C  | 1.9940182  | -2.4157620 | -2.7184140 |
| C  | 1.8324125  | -1.1303839 | -2.1795329 |
| C  | -0.2001407 | -1.8529545 | -1.0541714 |
| C  | -0.0489507 | -3.1298277 | -1.6038352 |
| C  | 1.2296801  | -4.8283375 | -2.9552798 |
| H  | 2.8553113  | -2.6375007 | -3.3665245 |
| H  | 2.5692766  | -0.3425361 | -2.4007842 |
| H  | -1.0604641 | -1.6353141 | -0.4029020 |
| H  | -0.7948139 | -3.9112308 | -1.3883314 |
| F  | 1.5905075  | -5.6834771 | -1.9621783 |
| F  | 2.1802621  | -4.9093161 | -3.9162865 |
| F  | 0.0749786  | -5.3095419 | -3.4819251 |

\$vibrational spectrum

| # | mode | symmetry | wave number | IR intensity | selection rules |
|---|------|----------|-------------|--------------|-----------------|
| # |      |          | cm**(-1)    | km/mol       | IR RAMAN        |
| 1 |      | a        | -255.12     | 0.00000      | YES YES         |
| 2 |      |          | 0.00        | 0.00000      | - -             |
| 3 |      |          | 0.00        | 0.00000      | - -             |
| 4 |      |          | 0.00        | 0.00000      | - -             |

|    |   |        |          |     |     |
|----|---|--------|----------|-----|-----|
| 5  |   | 0.00   | 0.00000  | -   | -   |
| 6  |   | 0.00   | 0.00000  | -   | -   |
| 7  |   | 0.00   | 0.00000  | -   | -   |
| 8  | a | 19.38  | 0.35992  | YES | YES |
| 9  | a | 27.80  | 0.03761  | YES | YES |
| 10 | a | 36.47  | 0.52845  | YES | YES |
| 11 | a | 39.58  | 0.21012  | YES | YES |
| 12 | a | 53.23  | 0.14211  | YES | YES |
| 13 | a | 64.72  | 0.08135  | YES | YES |
| 14 | a | 68.31  | 0.41793  | YES | YES |
| 15 | a | 84.55  | 0.02591  | YES | YES |
| 16 | a | 89.92  | 0.66128  | YES | YES |
| 17 | a | 98.38  | 0.68424  | YES | YES |
| 18 | a | 99.94  | 0.07422  | YES | YES |
| 19 | a | 106.78 | 0.31950  | YES | YES |
| 20 | a | 114.25 | 0.24696  | YES | YES |
| 21 | a | 134.60 | 0.04530  | YES | YES |
| 22 | a | 147.90 | 0.70488  | YES | YES |
| 23 | a | 158.95 | 0.91092  | YES | YES |
| 24 | a | 174.99 | 0.16022  | YES | YES |
| 25 | a | 205.88 | 0.13288  | YES | YES |
| 26 | a | 222.42 | 2.44858  | YES | YES |
| 27 | a | 227.63 | 0.35744  | YES | YES |
| 28 | a | 249.15 | 0.21159  | YES | YES |
| 29 | a | 278.70 | 1.18101  | YES | YES |
| 30 | a | 283.25 | 0.15136  | YES | YES |
| 31 | a | 349.26 | 9.91686  | YES | YES |
| 32 | a | 359.42 | 6.76641  | YES | YES |
| 33 | a | 383.55 | 2.45183  | YES | YES |
| 34 | a | 395.33 | 2.70311  | YES | YES |
| 35 | a | 398.54 | 1.47142  | YES | YES |
| 36 | a | 416.19 | 6.80839  | YES | YES |
| 37 | a | 430.08 | 0.93652  | YES | YES |
| 38 | a | 447.93 | 4.21251  | YES | YES |
| 39 | a | 457.31 | 0.25923  | YES | YES |
| 40 | a | 464.37 | 2.95976  | YES | YES |
| 41 | a | 475.72 | 0.71042  | YES | YES |
| 42 | a | 487.97 | 2.61682  | YES | YES |
| 43 | a | 494.87 | 3.04247  | YES | YES |
| 44 | a | 509.69 | 1.79537  | YES | YES |
| 45 | a | 521.65 | 1.12330  | YES | YES |
| 46 | a | 523.98 | 8.59362  | YES | YES |
| 47 | a | 536.63 | 14.48469 | YES | YES |
| 48 | a | 550.84 | 2.04644  | YES | YES |
| 49 | a | 557.50 | 1.58670  | YES | YES |
| 50 | a | 570.14 | 0.27068  | YES | YES |

**TS<sub>23bh</sub>**

SCF Energy (au) BP86/SV(P) -2505.236367416  
 SCF Energy (au) PBE0/def2-TZVPP -2504.785704894  
 SCF Energy (au) PBE0/def2-TZVPP -2504.7950366914 (Toluene Correction)  
 Zero Point Energy (au) 0.3307489  
 Chemical Potential (kJ mol<sup>-1</sup>) 706.50  
 Dispersion Correction (au) PBE0/def2-TZVPP -0.06699044

## xyz coordinates

47

|    |            |            |            |
|----|------------|------------|------------|
| Mn | 1.6754286  | -0.0989474 | 1.7320687  |
| C  | 2.0246866  | 0.1907221  | 3.4826619  |
| C  | 3.3761028  | -0.5732624 | 1.4381564  |
| C  | 2.0663400  | 1.6058582  | 1.2761918  |
| O  | 2.3505924  | 2.7059428  | 1.0062560  |
| O  | 4.4836663  | -0.8920963 | 1.2525671  |
| O  | 2.2394096  | 0.3678434  | 4.6123541  |
| C  | -1.1236676 | -0.7355322 | 2.5456355  |
| C  | -0.9827449 | 1.4824181  | 1.7886419  |
| C  | -2.3512267 | 1.6956683  | 1.9750354  |
| C  | -3.1364053 | 0.6318319  | 2.4555878  |
| C  | -2.5185919 | -0.5881900 | 2.7359582  |
| C  | -0.3629939 | -1.9519531 | 2.8274500  |
| C  | 0.9942964  | -1.9662292 | 2.3738530  |
| C  | 1.7871152  | -3.0969841 | 2.7083437  |
| C  | 1.2591085  | -4.1680168 | 3.4344833  |
| C  | -0.0931520 | -4.1578398 | 3.8456843  |
| C  | -0.8945836 | -3.0551473 | 3.5412365  |
| H  | -0.3378479 | 2.2853166  | 1.4005864  |
| H  | -2.7881502 | 2.6779311  | 1.7388707  |
| H  | -4.2216541 | 0.7544255  | 2.6044017  |
| H  | -3.1116575 | -1.4403217 | 3.0990710  |
| H  | 2.8387260  | -3.1386268 | 2.3775361  |
| H  | 1.9051987  | -5.0252121 | 3.6886868  |
| H  | -0.5096903 | -5.0056651 | 4.4129586  |
| H  | -1.9400714 | -3.0369371 | 3.8898672  |
| N  | -0.3756995 | 0.3062179  | 2.0637330  |
| C  | 0.4636371  | 0.1596775  | -1.4108760 |
| C  | 1.1217846  | 1.2999242  | -1.9468962 |
| C  | 0.6946638  | 1.8756950  | -3.1472259 |
| C  | -0.4168376 | 1.3493412  | -3.8430565 |
| C  | -1.0859068 | 0.2230198  | -3.3128248 |
| C  | -0.6556187 | -0.3642270 | -2.1220225 |
| H  | 1.9853339  | 1.7276221  | -1.4171679 |
| H  | 1.2213671  | 2.7505785  | -3.5564537 |
| C  | -0.9245870 | 1.9319464  | -5.1192142 |
| H  | -1.9516267 | -0.1796151 | -3.8622928 |
| H  | -1.1828555 | -1.2410020 | -1.7133119 |
| C  | 0.8882290  | -0.4932444 | -0.2000688 |
| C  | 1.0969078  | -1.6260932 | 0.3897569  |
| H  | 1.3282855  | -2.6646696 | 0.1347985  |
| O  | -0.1900944 | 3.0065661  | -5.5221740 |
| O  | -1.8845255 | 1.5108534  | -5.7466551 |
| C  | -0.6152721 | 3.6178162  | -6.7452257 |
| H  | -0.5710537 | 2.8924294  | -7.5861685 |
| H  | 0.0841179  | 4.4583675  | -6.9218394 |
| H  | -1.6584831 | 3.9917998  | -6.6589589 |

## \$vibrational spectrum

| # | mode | symmetry | wave number | IR intensity | selection rules |
|---|------|----------|-------------|--------------|-----------------|
| # |      |          | cm** (-1)   | km/mol       | IR RAMAN        |
| 1 |      | a        | -220.95     | 0.00000      | YES YES         |



|    |   |        |          |     |     |
|----|---|--------|----------|-----|-----|
| 2  |   | 0.00   | 0.00000  | -   | -   |
| 3  |   | 0.00   | 0.00000  | -   | -   |
| 4  |   | 0.00   | 0.00000  | -   | -   |
| 5  |   | 0.00   | 0.00000  | -   | -   |
| 6  |   | 0.00   | 0.00000  | -   | -   |
| 7  |   | 0.00   | 0.00000  | -   | -   |
| 8  | a | 7.19   | 0.62059  | YES | YES |
| 9  | a | 17.95  | 0.53375  | YES | YES |
| 10 | a | 33.13  | 0.60224  | YES | YES |
| 11 | a | 50.45  | 0.43904  | YES | YES |
| 12 | a | 62.46  | 0.22710  | YES | YES |
| 13 | a | 65.98  | 0.05742  | YES | YES |
| 14 | a | 71.16  | 0.53438  | YES | YES |
| 15 | a | 81.74  | 0.48049  | YES | YES |
| 16 | a | 88.35  | 0.37958  | YES | YES |
| 17 | a | 91.20  | 0.84586  | YES | YES |
| 18 | a | 100.95 | 0.52271  | YES | YES |
| 19 | a | 104.34 | 0.18076  | YES | YES |
| 20 | a | 110.48 | 0.04179  | YES | YES |
| 21 | a | 114.82 | 0.38083  | YES | YES |
| 22 | a | 122.64 | 0.13392  | YES | YES |
| 23 | a | 151.79 | 1.20487  | YES | YES |
| 24 | a | 162.80 | 2.63536  | YES | YES |
| 25 | a | 172.13 | 1.96656  | YES | YES |
| 26 | a | 186.96 | 2.89815  | YES | YES |
| 27 | a | 196.98 | 0.65384  | YES | YES |
| 28 | a | 234.08 | 0.43297  | YES | YES |
| 29 | a | 243.10 | 2.46732  | YES | YES |
| 30 | a | 258.63 | 1.81873  | YES | YES |
| 31 | a | 278.49 | 0.18283  | YES | YES |
| 32 | a | 310.30 | 17.10652 | YES | YES |
| 33 | a | 330.95 | 7.58735  | YES | YES |
| 34 | a | 357.39 | 4.72527  | YES | YES |
| 35 | a | 366.76 | 16.85249 | YES | YES |
| 36 | a | 406.16 | 0.17136  | YES | YES |
| 37 | a | 410.28 | 2.19811  | YES | YES |
| 38 | a | 419.15 | 3.05301  | YES | YES |
| 39 | a | 432.70 | 3.35204  | YES | YES |
| 40 | a | 444.49 | 1.07229  | YES | YES |
| 41 | a | 458.63 | 2.25641  | YES | YES |
| 42 | a | 463.19 | 6.28765  | YES | YES |
| 43 | a | 468.90 | 5.35694  | YES | YES |
| 44 | a | 481.86 | 0.52039  | YES | YES |
| 45 | a | 494.74 | 3.15862  | YES | YES |
| 46 | a | 502.91 | 11.21556 | YES | YES |
| 47 | a | 510.39 | 13.39519 | YES | YES |
| 48 | a | 531.24 | 6.55006  | YES | YES |
| 49 | a | 544.18 | 13.64828 | YES | YES |
| 50 | a | 549.57 | 6.58159  | YES | YES |

**TS<sub>23bh</sub>'**

SCF Energy (au) BP86/SV(P) -2505.225492213  
SCF Energy (au) PBE0/def2-TZVPP -2504.775890270  
SCF Energy (au) PBE0/def2-TZVPP -2504.7853054603 (Toluene Correction)  
Zero Point Energy (au) 0.3306400  
Chemical Potential (kJ mol<sup>-1</sup>) 709.19  
Dispersion Correction (au) PBE0/def2-TZVPP -0.06918112

## xyz coordinates

47

|    |            |            |            |
|----|------------|------------|------------|
| Mn | 0.9887955  | 2.7402352  | 0.7706369  |
| C  | 1.0993447  | 3.1983377  | 2.5227002  |
| C  | 2.7327679  | 2.3462166  | 0.7441052  |
| C  | 1.3325783  | 4.3975058  | 0.1610897  |
| O  | 1.5635823  | 5.4539063  | -0.2801258 |
| O  | 3.8701017  | 2.0799175  | 0.7359770  |
| O  | 1.1627870  | 3.5019474  | 3.6453639  |
| C  | -1.8493390 | 1.9787834  | 1.3069888  |
| C  | -1.7496036 | 4.1506747  | 0.4281616  |
| C  | -3.1406970 | 4.2900659  | 0.4562208  |
| C  | -3.9135692 | 3.2089836  | 0.9170475  |
| C  | -3.2624680 | 2.0479015  | 1.3394548  |
| C  | -1.0562409 | 0.8339295  | 1.7602694  |
| C  | 0.3267248  | 0.8359876  | 1.3934286  |
| C  | 1.1423542  | -0.2092920 | 1.8991227  |
| C  | 0.6232379  | -1.1958656 | 2.7438670  |
| C  | -0.7471626 | -1.1977348 | 3.0836444  |
| C  | -1.5805428 | -0.1897356 | 2.5881098  |
| H  | -1.1101961 | 4.9691260  | 0.0627906  |
| H  | -3.6031842 | 5.2293250  | 0.1159073  |
| H  | -5.0136938 | 3.2720352  | 0.9419270  |
| H  | -3.8421898 | 1.1812040  | 1.6903115  |
| H  | 2.2090619  | -0.2462592 | 1.6234060  |
| H  | 1.2906992  | -1.9780785 | 3.1427249  |
| H  | -1.1566153 | -1.9788526 | 3.7444260  |
| H  | -2.6425742 | -0.1732216 | 2.8834889  |
| N  | -1.1121824 | 3.0325985  | 0.8391478  |
| H  | 0.5731256  | 2.6691468  | -2.1492393 |
| C  | 0.5999846  | 2.2146977  | -1.1533827 |
| C  | 0.5725363  | 1.0374637  | -0.6096531 |
| C  | 0.7569336  | -0.3466514 | -1.0761748 |
| C  | 1.1032229  | -2.9331540 | -2.1894601 |
| C  | 1.9936720  | -1.8902474 | -2.5201913 |
| C  | 1.8227303  | -0.6136950 | -1.9733878 |
| C  | -0.1261273 | -1.4013112 | -0.7416334 |
| C  | 0.0391434  | -2.6750319 | -1.2969620 |
| C  | 1.3347123  | -4.2748564 | -2.8077003 |
| H  | 2.8222398  | -2.1055597 | -3.2130084 |
| H  | 2.5225023  | 0.1981937  | -2.2265386 |
| H  | -0.9587920 | -1.2106318 | -0.0473453 |
| H  | -0.6601518 | -3.4848910 | -1.0415122 |
| O  | 0.4172089  | -5.1943266 | -2.4003227 |
| O  | 2.2358853  | -4.5350583 | -3.5888433 |
| C  | 0.5740883  | -6.5059498 | -2.9548469 |
| H  | 1.5647993  | -6.9322792 | -2.6864025 |
| H  | 0.4918442  | -6.4785578 | -4.0629580 |
| H  | -0.2413344 | -7.1169416 | -2.5206298 |

## \$vibrational spectrum

| # | mode | symmetry | wave number | IR intensity | selection rules |
|---|------|----------|-------------|--------------|-----------------|
| # |      |          | cm**(-1)    | km/mol       | IR RAMAN        |
| 1 |      | a        | -279.75     | 0.00000      | YES YES         |

|    |   |        |          |     |     |
|----|---|--------|----------|-----|-----|
| 2  |   | 0.00   | 0.00000  | -   | -   |
| 3  |   | 0.00   | 0.00000  | -   | -   |
| 4  |   | 0.00   | 0.00000  | -   | -   |
| 5  |   | 0.00   | 0.00000  | -   | -   |
| 6  |   | 0.00   | 0.00000  | -   | -   |
| 7  |   | 0.00   | 0.00000  | -   | -   |
| 8  | a | 17.51  | 0.16059  | YES | YES |
| 9  | a | 24.76  | 0.87042  | YES | YES |
| 10 | a | 32.68  | 0.08852  | YES | YES |
| 11 | a | 47.97  | 0.12715  | YES | YES |
| 12 | a | 64.95  | 0.28703  | YES | YES |
| 13 | a | 67.25  | 0.27949  | YES | YES |
| 14 | a | 70.35  | 0.90578  | YES | YES |
| 15 | a | 82.07  | 0.00642  | YES | YES |
| 16 | a | 87.39  | 0.43598  | YES | YES |
| 17 | a | 94.66  | 0.19779  | YES | YES |
| 18 | a | 100.79 | 0.72579  | YES | YES |
| 19 | a | 103.57 | 0.34623  | YES | YES |
| 20 | a | 112.09 | 1.05407  | YES | YES |
| 21 | a | 118.76 | 0.83993  | YES | YES |
| 22 | a | 127.62 | 0.31218  | YES | YES |
| 23 | a | 145.61 | 0.61791  | YES | YES |
| 24 | a | 153.40 | 2.18467  | YES | YES |
| 25 | a | 166.37 | 1.25911  | YES | YES |
| 26 | a | 184.68 | 2.11024  | YES | YES |
| 27 | a | 213.11 | 0.34696  | YES | YES |
| 28 | a | 220.16 | 0.27071  | YES | YES |
| 29 | a | 238.70 | 4.94535  | YES | YES |
| 30 | a | 250.11 | 1.12507  | YES | YES |
| 31 | a | 280.11 | 0.16457  | YES | YES |
| 32 | a | 311.94 | 19.32206 | YES | YES |
| 33 | a | 342.79 | 4.65277  | YES | YES |
| 34 | a | 352.63 | 5.38192  | YES | YES |
| 35 | a | 359.74 | 5.76677  | YES | YES |
| 36 | a | 406.74 | 0.90136  | YES | YES |
| 37 | a | 409.68 | 8.43837  | YES | YES |
| 38 | a | 417.12 | 3.65096  | YES | YES |
| 39 | a | 439.06 | 1.80633  | YES | YES |
| 40 | a | 456.81 | 4.34689  | YES | YES |
| 41 | a | 463.91 | 1.20800  | YES | YES |
| 42 | a | 472.63 | 7.62376  | YES | YES |
| 43 | a | 481.41 | 4.75192  | YES | YES |
| 44 | a | 490.61 | 0.25573  | YES | YES |
| 45 | a | 496.13 | 1.41333  | YES | YES |
| 46 | a | 506.21 | 4.74702  | YES | YES |
| 47 | a | 530.13 | 5.95655  | YES | YES |
| 48 | a | 533.50 | 3.73254  | YES | YES |
| 49 | a | 537.58 | 8.44805  | YES | YES |
| 50 | a | 551.81 | 5.46093  | YES | YES |

**TS<sub>23bi</sub>**

|                                            |                                       |
|--------------------------------------------|---------------------------------------|
| SCF Energy (au) BP86/SV(P)                 | -2508.400949832                       |
| SCF Energy (au) PBE0/def2-TZVPP            | -2507.915535463                       |
| SCF Energy (au) PBE0/def2-TZVPP            | -2507.9234924354 (Toluene Correction) |
| Zero Point Energy (au)                     | 0.3685873                             |
| Chemical Potential (kJ mol <sup>-1</sup> ) | 807.17                                |
| Dispersion Correction (au) PBE0/def2-TZVPP | -0.08050516                           |

xyz coordinates

51

|    |            |            |            |
|----|------------|------------|------------|
| Mn | 1.2284099  | 1.2096656  | 1.1382910  |
| C  | 1.5620366  | 1.5138190  | 2.8913023  |
| C  | 2.9273281  | 0.7258085  | 0.8612965  |
| C  | 1.6434711  | 2.9064109  | 0.6896087  |
| O  | 1.9471210  | 4.0056210  | 0.4325857  |
| O  | 4.0370505  | 0.4075761  | 0.6800472  |
| O  | 1.7693929  | 1.7061248  | 4.0206092  |
| C  | -1.5930377 | 0.6161711  | 1.9181808  |
| C  | -1.4230210 | 2.8073479  | 1.0951993  |
| C  | -2.7945880 | 3.0321862  | 1.2429397  |
| C  | -3.5965644 | 1.9873808  | 1.7374686  |
| C  | -2.9914033 | 0.7740528  | 2.0703341  |
| C  | -0.8419187 | -0.5904372 | 2.2596235  |
| C  | 0.5137302  | -0.6407273 | 1.7988529  |
| C  | 1.3020194  | -1.7491283 | 2.2092470  |
| C  | 0.7803488  | -2.7527792 | 3.0305000  |
| C  | -0.5687414 | -2.7094054 | 3.4470207  |
| C  | -1.3732091 | -1.6351007 | 3.0566399  |
| H  | -0.7646249 | 3.5942705  | 0.6972160  |
| H  | -3.2206584 | 4.0087476  | 0.9665788  |
| H  | -4.6845633 | 2.1190964  | 1.8557951  |
| H  | -3.5965492 | -0.0653700 | 2.4436361  |
| H  | 2.3484940  | -1.8228908 | 1.8712361  |
| H  | 1.4288366  | -3.5857440 | 3.3501090  |
| H  | -0.9813079 | -3.5064344 | 4.0865512  |
| H  | -2.4159104 | -1.5845359 | 3.4112702  |
| N  | -0.8284099 | 1.6382384  | 1.4219360  |
| C  | 0.0945543  | 1.4033769  | -2.0120869 |
| C  | 0.6987102  | 2.5846759  | -2.5170173 |
| C  | 0.3105255  | 3.1154749  | -3.7557732 |
| C  | -0.7014314 | 2.4984187  | -4.5124083 |
| C  | -1.3199512 | 1.3340049  | -4.0200295 |
| C  | -0.9286343 | 0.7904781  | -2.7899662 |
| H  | 1.4879791  | 3.0825054  | -1.9351974 |
| H  | 0.8025534  | 4.0277355  | -4.1325043 |
| H  | -1.0100169 | 2.9242965  | -5.4814419 |
| H  | -2.1159919 | 0.8413282  | -4.6032712 |
| H  | -1.4131168 | -0.1221004 | -2.4074074 |
| C  | 0.4849326  | 0.7919926  | -0.7596752 |
| C  | 0.6176539  | -0.3872074 | -0.2165945 |
| C  | 0.9050220  | -1.7370470 | -0.7305169 |
| C  | 1.4063271  | -4.2630888 | -1.9051931 |
| C  | 2.2618486  | -3.1800486 | -2.1697585 |
| C  | 2.0123522  | -1.9246944 | -1.5928466 |
| C  | 0.0578509  | -2.8380240 | -0.4608263 |
| C  | 0.3020509  | -4.0862243 | -1.0522565 |
| H  | 1.6003697  | -5.2471813 | -2.3632658 |
| H  | 3.1321351  | -3.3104977 | -2.8343011 |
| H  | 2.6808079  | -1.0744638 | -1.8002598 |
| H  | -0.8045580 | -2.7030931 | 0.2113908  |
| H  | -0.3757043 | -4.9305813 | -0.8428687 |

\$vibrational spectrum

| #  | mode | symmetry | wave number<br>cm**(-1) | IR intensity<br>km/mol | selection rules |       |
|----|------|----------|-------------------------|------------------------|-----------------|-------|
| #  |      |          |                         |                        | IR              | RAMAN |
| 1  |      | a        | -211.54                 | 0.00000                | YES             | YES   |
| 2  |      |          | 0.00                    | 0.00000                | -               | -     |
| 3  |      |          | 0.00                    | 0.00000                | -               | -     |
| 4  |      |          | 0.00                    | 0.00000                | -               | -     |
| 5  |      |          | 0.00                    | 0.00000                | -               | -     |
| 6  |      |          | 0.00                    | 0.00000                | -               | -     |
| 7  |      |          | 0.00                    | 0.00000                | -               | -     |
| 8  |      | a        | 16.37                   | 0.10076                | YES             | YES   |
| 9  |      | a        | 21.57                   | 0.08172                | YES             | YES   |
| 10 |      | a        | 34.25                   | 0.18295                | YES             | YES   |
| 11 |      | a        | 36.01                   | 0.54213                | YES             | YES   |
| 12 |      | a        | 45.41                   | 0.04774                | YES             | YES   |
| 13 |      | a        | 59.27                   | 0.17249                | YES             | YES   |
| 14 |      | a        | 60.78                   | 0.21687                | YES             | YES   |
| 15 |      | a        | 72.34                   | 0.06198                | YES             | YES   |
| 16 |      | a        | 82.06                   | 0.05727                | YES             | YES   |
| 17 |      | a        | 90.47                   | 0.01476                | YES             | YES   |
| 18 |      | a        | 97.63                   | 0.96153                | YES             | YES   |
| 19 |      | a        | 100.50                  | 0.54914                | YES             | YES   |
| 20 |      | a        | 109.58                  | 0.14237                | YES             | YES   |
| 21 |      | a        | 119.03                  | 0.26936                | YES             | YES   |
| 22 |      | a        | 134.60                  | 0.28199                | YES             | YES   |
| 23 |      | a        | 163.90                  | 1.12153                | YES             | YES   |
| 24 |      | a        | 169.91                  | 0.74455                | YES             | YES   |
| 25 |      | a        | 182.93                  | 0.83635                | YES             | YES   |
| 26 |      | a        | 195.42                  | 2.51480                | YES             | YES   |
| 27 |      | a        | 222.37                  | 2.35535                | YES             | YES   |
| 28 |      | a        | 228.13                  | 0.18482                | YES             | YES   |
| 29 |      | a        | 246.98                  | 1.73153                | YES             | YES   |
| 30 |      | a        | 254.70                  | 0.90979                | YES             | YES   |
| 31 |      | a        | 282.61                  | 0.22690                | YES             | YES   |
| 32 |      | a        | 357.35                  | 1.85677                | YES             | YES   |
| 33 |      | a        | 376.57                  | 1.37678                | YES             | YES   |
| 34 |      | a        | 386.15                  | 5.82901                | YES             | YES   |
| 35 |      | a        | 402.20                  | 0.10506                | YES             | YES   |
| 36 |      | a        | 403.17                  | 0.31570                | YES             | YES   |
| 37 |      | a        | 416.22                  | 4.47644                | YES             | YES   |
| 38 |      | a        | 433.54                  | 0.99814                | YES             | YES   |
| 39 |      | a        | 438.89                  | 1.17057                | YES             | YES   |
| 40 |      | a        | 458.10                  | 0.65946                | YES             | YES   |
| 41 |      | a        | 471.77                  | 1.49662                | YES             | YES   |
| 42 |      | a        | 475.05                  | 1.42520                | YES             | YES   |
| 43 |      | a        | 491.89                  | 0.85399                | YES             | YES   |
| 44 |      | a        | 497.24                  | 0.46976                | YES             | YES   |
| 45 |      | a        | 503.12                  | 0.85840                | YES             | YES   |
| 46 |      | a        | 522.33                  | 51.85901               | YES             | YES   |
| 47 |      | a        | 537.37                  | 6.88208                | YES             | YES   |
| 48 |      | a        | 545.03                  | 6.98089                | YES             | YES   |
| 49 |      | a        | 552.23                  | 0.60839                | YES             | YES   |
| 50 |      | a        | 558.89                  | 6.15442                | YES             | YES   |

**TS<sub>23bj</sub>**

|                                            |                                       |
|--------------------------------------------|---------------------------------------|
| SCF Energy (au) BP86/SV(P)                 | -2360.864038348                       |
| SCF Energy (au) PBE0/def2-TZVPP            | -2360.429227641                       |
| SCF Energy (au) PBE0/def2-TZVPP            | -2360.4352858128 (Toluene Correction) |
| Zero Point Energy (au)                     | 0.4312018                             |
| Chemical Potential (kJ mol <sup>-1</sup> ) | 963.71                                |
| Dispersion Correction (au) PBE0/def2-TZVPP | -0.07320480                           |

xyz coordinates

55

|    |            |            |            |
|----|------------|------------|------------|
| Mn | 1.1107140  | 1.2303049  | 1.3664159  |
| C  | 1.4536300  | 1.4391606  | 3.1321289  |
| C  | 2.8216825  | 0.8326776  | 1.0473399  |
| C  | 1.4253820  | 2.9528506  | 0.9656235  |
| O  | 1.6383710  | 4.0679819  | 0.6816749  |
| O  | 3.9410779  | 0.5625425  | 0.8435184  |
| O  | 1.6673532  | 1.5794104  | 4.2692846  |
| C  | -1.6730865 | 0.4395534  | 2.1100267  |
| C  | -1.6057870 | 2.7156785  | 1.5460238  |
| C  | -2.9832332 | 2.8642757  | 1.7337919  |
| C  | -3.7346329 | 1.7350554  | 2.1086907  |
| C  | -3.0747851 | 0.5186962  | 2.2928447  |
| C  | -0.8665972 | -0.7623583 | 2.3160031  |
| C  | 0.4756185  | -0.7158966 | 1.8125509  |
| C  | 1.3177891  | -1.8216256 | 2.1160740  |
| C  | 0.8546450  | -2.9182694 | 2.8506572  |
| C  | -0.4826357 | -2.9653252 | 3.3041323  |
| C  | -1.3333770 | -1.8882625 | 3.0373132  |
| H  | -0.9843578 | 3.5731816  | 1.2442892  |
| H  | -3.4533714 | 3.8483478  | 1.5829998  |
| H  | -4.8252653 | 1.8056594  | 2.2523417  |
| H  | -3.6384380 | -0.3837800 | 2.5721509  |
| H  | 2.3676456  | -1.8105518 | 1.7788899  |
| H  | 1.5448939  | -3.7457250 | 3.0870740  |
| H  | -0.8465513 | -3.8300140 | 3.8820871  |
| H  | -2.3633460 | -1.9043005 | 3.4300284  |
| N  | -0.9591051 | 1.5423094  | 1.7231250  |
| C  | 0.1966399  | 1.7365319  | -1.7972506 |
| C  | 0.3998843  | 0.9469695  | -0.5521279 |
| C  | 0.4971635  | -0.2772839 | -0.1349112 |
| C  | 0.6203960  | -1.6273671 | -0.7939240 |
| H  | 0.8380856  | -1.4284989 | -1.8701320 |
| C  | -0.6203238 | -2.5383279 | -0.6982553 |
| H  | 1.5056578  | -2.1689530 | -0.3929317 |
| H  | -0.8285708 | -2.7767922 | 0.3683386  |
| C  | -0.4533369 | -3.8450511 | -1.4918898 |
| H  | -1.5094005 | -1.9814157 | -1.0763700 |
| C  | -1.6815875 | -4.7616080 | -1.4184072 |
| H  | 0.4416387  | -4.3915483 | -1.1109637 |
| H  | -0.2312817 | -3.6059767 | -2.5592191 |
| H  | -1.9058287 | -5.0516221 | -0.3672155 |
| H  | -1.5273465 | -5.6969813 | -2.0005963 |
| H  | -2.5876713 | -4.2585816 | -1.8259528 |
| C  | 1.5184950  | 2.1420550  | -2.4916082 |
| H  | -0.4194166 | 1.1371300  | -2.5106304 |
| H  | -0.3910740 | 2.6606134  | -1.5826174 |
| H  | 2.1366295  | 2.7389659  | -1.7842564 |
| C  | 1.2940266  | 2.9459554  | -3.7821047 |
| H  | 2.1069365  | 1.2223677  | -2.7176136 |
| C  | 2.6003986  | 3.3476417  | -4.4796392 |
| H  | 0.7021094  | 3.8614864  | -3.5442694 |
| H  | 0.6646045  | 2.3496998  | -4.4845199 |

|   |           |           |            |
|---|-----------|-----------|------------|
| H | 3.2350785 | 3.9776542 | -3.8167756 |
| H | 2.4033074 | 3.9279319 | -5.4080876 |
| H | 3.2005533 | 2.4534281 | -4.7631495 |

\$vibrational spectrum

| #  | mode | symmetry | wave number<br>cm**(-1) | IR intensity<br>km/mol | selection rules |       |
|----|------|----------|-------------------------|------------------------|-----------------|-------|
| #  |      |          |                         |                        | IR              | RAMAN |
| 1  |      | a        | -219.60                 | 0.00000                | YES             | YES   |
| 2  |      |          | 0.00                    | 0.00000                | -               | -     |
| 3  |      |          | 0.00                    | 0.00000                | -               | -     |
| 4  |      |          | 0.00                    | 0.00000                | -               | -     |
| 5  |      |          | 0.00                    | 0.00000                | -               | -     |
| 6  |      |          | 0.00                    | 0.00000                | -               | -     |
| 7  |      |          | 0.00                    | 0.00000                | -               | -     |
| 8  |      | a        | 6.59                    | 0.16626                | YES             | YES   |
| 9  |      | a        | 21.63                   | 0.11480                | YES             | YES   |
| 10 |      | a        | 27.79                   | 0.04135                | YES             | YES   |
| 11 |      | a        | 45.37                   | 0.12128                | YES             | YES   |
| 12 |      | a        | 53.12                   | 0.02177                | YES             | YES   |
| 13 |      | a        | 55.97                   | 0.43534                | YES             | YES   |
| 14 |      | a        | 70.10                   | 0.04223                | YES             | YES   |
| 15 |      | a        | 72.42                   | 0.08127                | YES             | YES   |
| 16 |      | a        | 75.44                   | 0.02293                | YES             | YES   |
| 17 |      | a        | 87.47                   | 0.13587                | YES             | YES   |
| 18 |      | a        | 96.79                   | 0.38697                | YES             | YES   |
| 19 |      | a        | 98.81                   | 0.56577                | YES             | YES   |
| 20 |      | a        | 104.77                  | 0.10079                | YES             | YES   |
| 21 |      | a        | 106.36                  | 0.13085                | YES             | YES   |
| 22 |      | a        | 109.55                  | 0.09909                | YES             | YES   |
| 23 |      | a        | 114.55                  | 0.02645                | YES             | YES   |
| 24 |      | a        | 127.64                  | 0.56038                | YES             | YES   |
| 25 |      | a        | 135.37                  | 0.27014                | YES             | YES   |
| 26 |      | a        | 162.64                  | 0.01310                | YES             | YES   |
| 27 |      | a        | 175.25                  | 0.25308                | YES             | YES   |
| 28 |      | a        | 194.71                  | 1.23061                | YES             | YES   |
| 29 |      | a        | 212.94                  | 1.39155                | YES             | YES   |
| 30 |      | a        | 228.42                  | 0.21344                | YES             | YES   |
| 31 |      | a        | 232.84                  | 0.76318                | YES             | YES   |
| 32 |      | a        | 244.25                  | 0.06565                | YES             | YES   |
| 33 |      | a        | 248.97                  | 0.13199                | YES             | YES   |
| 34 |      | a        | 266.74                  | 0.19040                | YES             | YES   |
| 35 |      | a        | 288.27                  | 0.59620                | YES             | YES   |
| 36 |      | a        | 295.77                  | 0.89610                | YES             | YES   |
| 37 |      | a        | 340.12                  | 0.37202                | YES             | YES   |
| 38 |      | a        | 357.71                  | 1.07517                | YES             | YES   |
| 39 |      | a        | 374.57                  | 0.06299                | YES             | YES   |
| 40 |      | a        | 407.13                  | 1.47999                | YES             | YES   |
| 41 |      | a        | 421.35                  | 4.57145                | YES             | YES   |
| 42 |      | a        | 432.67                  | 2.39157                | YES             | YES   |
| 43 |      | a        | 445.43                  | 1.55153                | YES             | YES   |
| 44 |      | a        | 454.74                  | 4.98736                | YES             | YES   |
| 45 |      | a        | 466.89                  | 5.00115                | YES             | YES   |
| 46 |      | a        | 476.97                  | 1.20250                | YES             | YES   |
| 47 |      | a        | 494.06                  | 1.72617                | YES             | YES   |
| 48 |      | a        | 501.73                  | 6.91228                | YES             | YES   |
| 49 |      | a        | 506.03                  | 1.37450                | YES             | YES   |
| 50 |      | a        | 539.27                  | 6.90485                | YES             | YES   |

**TS<sub>23ca</sub>**

|                                            |                                       |
|--------------------------------------------|---------------------------------------|
| SCF Energy (au) BP86/SV(P)                 | -2678.188164496                       |
| SCF Energy (au) PBE0/def2-TZVPP            | -2677.701903263                       |
| SCF Energy (au) PBE0/def2-TZVPP            | -2677.7129455643 (Toluene Correction) |
| Zero Point Energy (au)                     | 0.4155167                             |
| Chemical Potential (kJ mol <sup>-1</sup> ) | 916.38                                |
| Dispersion Correction (au) PBE0/def2-TZVPP | -0.08439631                           |

xyz coordinates

57

|    |            |            |            |
|----|------------|------------|------------|
| Mn | 0.9098750  | 1.8356666  | -0.2916640 |
| C  | 1.2396347  | 1.7871900  | 1.4765609  |
| C  | 2.6475571  | 1.4826921  | -0.6359753 |
| C  | 1.2684348  | 3.6041827  | -0.4316902 |
| O  | 1.5234693  | 4.7442112  | -0.4771170 |
| O  | 3.7804513  | 1.3542633  | -0.8649219 |
| O  | 1.4479138  | 1.7134857  | 2.6212918  |
| C  | -1.8802210 | 1.0356747  | 0.3493143  |
| C  | -1.7800896 | 3.3400611  | -0.0736442 |
| C  | -3.1543107 | 3.4950630  | 0.1368629  |
| C  | -3.9182654 | 2.3601831  | 0.4620128  |
| C  | -3.2752138 | 1.1242711  | 0.5635844  |
| C  | -1.0968017 | -0.1954282 | 0.4200711  |
| C  | 0.2443544  | -0.0788298 | 0.0221512  |
| C  | 1.1020101  | -1.2669893 | 0.0707704  |
| N  | 0.5215603  | -2.4547193 | 0.6223414  |
| C  | -0.8134899 | -2.5505430 | 0.9935413  |
| C  | -1.6291399 | -1.4425809 | 0.8747245  |
| O  | 2.2686222  | -1.2951855 | -0.3465440 |
| C  | -1.3307536 | -3.8699686 | 1.5038338  |
| N  | -1.1477021 | 2.1506025  | 0.0307723  |
| C  | -0.2902579 | 2.7328610  | -3.3445501 |
| C  | 0.3587554  | 3.9618873  | -3.6353746 |
| C  | -0.1252227 | 4.8024539  | -4.6468580 |
| C  | -1.2719680 | 4.4519655  | -5.3818446 |
| C  | -1.9313876 | 3.2424671  | -5.0980075 |
| C  | -1.4509279 | 2.3912803  | -4.0941614 |
| C  | 0.1940592  | 1.8083271  | -2.3515034 |
| C  | 0.4807960  | 0.6193957  | -1.9634753 |
| H  | -1.1527441 | 4.2049584  | -0.3367287 |
| H  | -3.6108193 | 4.4924433  | 0.0431678  |
| H  | -5.0045652 | 2.4403470  | 0.6306485  |
| H  | -3.8477972 | 0.2165580  | 0.8036044  |
| H  | -2.6803769 | -1.5363013 | 1.1820166  |
| H  | 1.2573669  | 4.2480346  | -3.0692580 |
| H  | 0.4019777  | 5.7466836  | -4.8629965 |
| H  | -1.6512502 | 5.1200554  | -6.1726422 |
| H  | -2.8320578 | 2.9567922  | -5.6672691 |
| H  | -1.9685037 | 1.4439589  | -3.8730518 |
| H  | 0.8582417  | -0.3508818 | -2.3010040 |
| H  | -2.3920439 | -3.7659231 | 1.8075188  |
| H  | -0.7512141 | -4.2328524 | 2.3812089  |
| H  | -1.2788372 | -4.6654035 | 0.7251127  |
| C  | 1.4364970  | -3.5980294 | 0.7741268  |
| C  | 1.8947015  | -3.8576669 | 2.2018580  |
| H  | 2.3122862  | -3.3335121 | 0.1421400  |
| H  | 0.9677445  | -4.5078727 | 0.3462925  |
| C  | 2.8641164  | -4.3778490 | 4.8109069  |
| C  | 2.6104896  | -5.4404944 | 3.9273811  |
| C  | 2.1261966  | -5.1802333 | 2.6345091  |
| C  | 2.1530863  | -2.7975710 | 3.0957061  |
| C  | 2.6320497  | -3.0567575 | 4.3904190  |



|   |           |            |           |
|---|-----------|------------|-----------|
| H | 3.2410988 | -4.5788708 | 5.8274084 |
| H | 2.7857707 | -6.4813136 | 4.2470369 |
| H | 1.9267051 | -6.0209632 | 1.9470027 |
| H | 1.9802871 | -1.7558425 | 2.7791501 |
| H | 2.8298523 | -2.2154333 | 5.0752334 |

\$vibrational spectrum

| #  | mode | symmetry | wave number<br>cm**(-1) | IR intensity<br>km/mol | selection rules |       |
|----|------|----------|-------------------------|------------------------|-----------------|-------|
| #  |      |          |                         |                        | IR              | RAMAN |
| 1  |      | a        | -158.39                 | 0.00000                | YES             | YES   |
| 2  |      |          | 0.00                    | 0.00000                | -               | -     |
| 3  |      |          | 0.00                    | 0.00000                | -               | -     |
| 4  |      |          | 0.00                    | 0.00000                | -               | -     |
| 5  |      |          | 0.00                    | 0.00000                | -               | -     |
| 6  |      |          | 0.00                    | 0.00000                | -               | -     |
| 7  |      |          | 0.00                    | 0.00000                | -               | -     |
| 8  |      | a        | 16.31                   | 0.16610                | YES             | YES   |
| 9  |      | a        | 19.21                   | 0.14140                | YES             | YES   |
| 10 |      | a        | 20.70                   | 0.05217                | YES             | YES   |
| 11 |      | a        | 24.15                   | 0.13533                | YES             | YES   |
| 12 |      | a        | 28.69                   | 0.60836                | YES             | YES   |
| 13 |      | a        | 43.50                   | 0.11576                | YES             | YES   |
| 14 |      | a        | 55.93                   | 2.17310                | YES             | YES   |
| 15 |      | a        | 70.63                   | 0.18942                | YES             | YES   |
| 16 |      | a        | 75.08                   | 0.18011                | YES             | YES   |
| 17 |      | a        | 83.27                   | 0.01423                | YES             | YES   |
| 18 |      | a        | 85.27                   | 0.56858                | YES             | YES   |
| 19 |      | a        | 97.48                   | 0.55006                | YES             | YES   |
| 20 |      | a        | 103.95                  | 0.30751                | YES             | YES   |
| 21 |      | a        | 111.46                  | 0.39234                | YES             | YES   |
| 22 |      | a        | 115.39                  | 0.63150                | YES             | YES   |
| 23 |      | a        | 126.26                  | 0.45633                | YES             | YES   |
| 24 |      | a        | 145.84                  | 0.24780                | YES             | YES   |
| 25 |      | a        | 153.38                  | 0.50353                | YES             | YES   |
| 26 |      | a        | 162.83                  | 0.10641                | YES             | YES   |
| 27 |      | a        | 192.28                  | 0.83006                | YES             | YES   |
| 28 |      | a        | 192.55                  | 0.52243                | YES             | YES   |
| 29 |      | a        | 204.96                  | 1.16647                | YES             | YES   |
| 30 |      | a        | 213.33                  | 0.26692                | YES             | YES   |
| 31 |      | a        | 245.14                  | 0.49944                | YES             | YES   |
| 32 |      | a        | 252.28                  | 0.39293                | YES             | YES   |
| 33 |      | a        | 255.49                  | 0.28550                | YES             | YES   |
| 34 |      | a        | 260.15                  | 1.10096                | YES             | YES   |
| 35 |      | a        | 305.23                  | 0.85843                | YES             | YES   |
| 36 |      | a        | 326.12                  | 2.04965                | YES             | YES   |
| 37 |      | a        | 350.42                  | 7.12781                | YES             | YES   |
| 38 |      | a        | 368.62                  | 4.52977                | YES             | YES   |
| 39 |      | a        | 383.52                  | 3.78026                | YES             | YES   |
| 40 |      | a        | 400.95                  | 0.02287                | YES             | YES   |
| 41 |      | a        | 401.52                  | 0.22387                | YES             | YES   |
| 42 |      | a        | 411.81                  | 10.99243               | YES             | YES   |
| 43 |      | a        | 430.02                  | 7.43046                | YES             | YES   |
| 44 |      | a        | 440.22                  | 13.87203               | YES             | YES   |
| 45 |      | a        | 450.45                  | 13.59888               | YES             | YES   |
| 46 |      | a        | 460.14                  | 1.30985                | YES             | YES   |
| 47 |      | a        | 464.12                  | 4.29608                | YES             | YES   |
| 48 |      | a        | 468.65                  | 9.67586                | YES             | YES   |
| 49 |      | a        | 478.93                  | 0.85227                | YES             | YES   |
| 50 |      | a        | 492.04                  | 2.00409                | YES             | YES   |

**TS<sub>23ca</sub>'**

|                                            |                                       |
|--------------------------------------------|---------------------------------------|
| SCF Energy (au) BP86/SV(P)                 | -2678.177478525                       |
| SCF Energy (au) PBE0/def2-TZVPP            | -2677.690686045                       |
| SCF Energy (au) PBE0/def2-TZVPP            | -2677.7015428126 (Toluene Correction) |
| Zero Point Energy (au)                     | 0.4152541                             |
| Chemical Potential (kJ mol <sup>-1</sup> ) | 916.57                                |
| Dispersion Correction (au) PBE0/def2-TZVPP | -0.08703529                           |

xyz coordinates

57

|    |            |            |            |
|----|------------|------------|------------|
| Mn | 0.7138071  | 2.8980516  | -0.5336869 |
| C  | 1.1068390  | 2.9124074  | 1.2304921  |
| C  | 2.4330774  | 2.5191573  | -0.9176994 |
| C  | 1.0673393  | 4.6427539  | -0.8047677 |
| O  | 1.2919132  | 5.7699489  | -1.0160662 |
| O  | 3.5587450  | 2.3776686  | -1.1815661 |
| O  | 1.3553517  | 2.9018747  | 2.3702301  |
| C  | -2.1057198 | 2.1386502  | 0.1223057  |
| C  | -1.9501941 | 4.4577347  | -0.1693790 |
| C  | -3.3216873 | 4.6340174  | 0.0451723  |
| C  | -4.1161799 | 3.4991076  | 0.2881568  |
| C  | -3.5023884 | 2.2449093  | 0.3223966  |
| C  | -1.3448304 | 0.8924277  | 0.1766645  |
| C  | -0.0125015 | 0.9761958  | -0.2680189 |
| C  | 0.8685198  | -0.1849968 | -0.0775572 |
| N  | 0.2665812  | -1.3659019 | 0.4587460  |
| C  | -1.0716427 | -1.4466455 | 0.8181379  |
| C  | -1.8769306 | -0.3308541 | 0.6869901  |
| O  | 2.0773055  | -0.1866064 | -0.3435158 |
| C  | -1.6044607 | -2.7531520 | 1.3442330  |
| N  | -1.3467834 | 3.2502233  | -0.1343219 |
| H  | -0.1032397 | 3.4828033  | -3.3241380 |
| C  | 0.0146097  | 2.8232305  | -2.4592061 |
| C  | 0.0568635  | 1.5599712  | -2.1817017 |
| H  | -1.2997601 | 5.3214130  | -0.3769251 |
| H  | -3.7533767 | 5.6464581  | 0.0168647  |
| H  | -5.2027305 | 3.5943436  | 0.4475574  |
| H  | -4.0977751 | 1.3370573  | 0.4986173  |
| H  | -2.9203268 | -0.4004872 | 1.0261529  |
| C  | 0.1335619  | 0.2634315  | -2.8797375 |
| H  | -2.6641268 | -2.6326257 | 1.6477354  |
| H  | -1.0283502 | -3.1150192 | 2.2242253  |
| H  | -1.5641031 | -3.5554622 | 0.5720072  |
| C  | 1.1742491  | -2.5126875 | 0.6429649  |
| C  | 1.6278683  | -2.7425968 | 2.0771552  |
| H  | 2.0556937  | -2.2718138 | 0.0110307  |
| H  | 0.6944240  | -3.4261753 | 0.2371900  |
| C  | 2.5715018  | -3.2122539 | 4.7051519  |
| C  | 2.2125776  | -4.2920695 | 3.8813847  |
| C  | 1.7410718  | -4.0560628 | 2.5787635  |
| C  | 1.9956023  | -1.6648834 | 2.9105629  |
| C  | 2.4601761  | -1.8991837 | 4.2149380  |
| H  | 2.9379800  | -3.3932633 | 5.7292854  |
| H  | 2.2948495  | -5.3264140 | 4.2551135  |
| H  | 1.4581802  | -4.9098036 | 1.9380594  |
| H  | 1.9264470  | -0.6309753 | 2.5351710  |
| H  | 2.7442427  | -1.0452621 | 4.8521320  |
| C  | 0.2436835  | -2.1439634 | -4.3543183 |
| C  | 1.4121581  | -1.3909553 | -4.1411569 |
| C  | 1.3624037  | -0.1939805 | -3.4101481 |
| C  | -1.0348033 | -0.5068422 | -3.0829668 |
| C  | -0.9801775 | -1.6970952 | -3.8257625 |

|   |            |            |            |
|---|------------|------------|------------|
| H | 0.2866425  | -3.0809266 | -4.9343947 |
| H | 2.3755773  | -1.7373742 | -4.5504159 |
| H | 2.2753711  | 0.3951156  | -3.2379028 |
| H | -1.9912614 | -0.1537877 | -2.6662400 |
| H | -1.9018648 | -2.2788318 | -3.9939954 |

\$vibrational spectrum

| # | mode | symmetry | wave number<br>cm**(-1) | IR intensity<br>km/mol | selection rules |       |
|---|------|----------|-------------------------|------------------------|-----------------|-------|
| # |      |          |                         |                        | IR              | RAMAN |
|   | 1    | a        | -281.77                 | 0.00000                | YES             | YES   |
|   | 2    |          | 0.00                    | 0.00000                | -               | -     |
|   | 3    |          | 0.00                    | 0.00000                | -               | -     |
|   | 4    |          | 0.00                    | 0.00000                | -               | -     |
|   | 5    |          | 0.00                    | 0.00000                | -               | -     |
|   | 6    |          | 0.00                    | 0.00000                | -               | -     |
|   | 7    |          | 0.00                    | 0.00000                | -               | -     |
|   | 8    | a        | 16.92                   | 0.11677                | YES             | YES   |
|   | 9    | a        | 22.81                   | 0.48793                | YES             | YES   |
|   | 10   | a        | 23.35                   | 0.50714                | YES             | YES   |
|   | 11   | a        | 27.88                   | 0.38305                | YES             | YES   |
|   | 12   | a        | 35.47                   | 0.34503                | YES             | YES   |
|   | 13   | a        | 41.64                   | 0.12674                | YES             | YES   |
|   | 14   | a        | 45.75                   | 0.06490                | YES             | YES   |
|   | 15   | a        | 64.64                   | 1.23398                | YES             | YES   |
|   | 16   | a        | 79.99                   | 0.08681                | YES             | YES   |
|   | 17   | a        | 81.42                   | 0.30846                | YES             | YES   |
|   | 18   | a        | 86.23                   | 0.18885                | YES             | YES   |
|   | 19   | a        | 86.86                   | 2.02877                | YES             | YES   |
|   | 20   | a        | 100.20                  | 0.10912                | YES             | YES   |
|   | 21   | a        | 112.65                  | 1.15652                | YES             | YES   |
|   | 22   | a        | 117.48                  | 0.75015                | YES             | YES   |
|   | 23   | a        | 127.85                  | 0.27572                | YES             | YES   |
|   | 24   | a        | 145.38                  | 0.60008                | YES             | YES   |
|   | 25   | a        | 159.80                  | 0.21392                | YES             | YES   |
|   | 26   | a        | 176.84                  | 5.07115                | YES             | YES   |
|   | 27   | a        | 185.84                  | 0.24957                | YES             | YES   |
|   | 28   | a        | 191.89                  | 0.82374                | YES             | YES   |
|   | 29   | a        | 198.90                  | 2.00031                | YES             | YES   |
|   | 30   | a        | 206.45                  | 2.92257                | YES             | YES   |
|   | 31   | a        | 229.40                  | 0.29347                | YES             | YES   |
|   | 32   | a        | 239.23                  | 0.17811                | YES             | YES   |
|   | 33   | a        | 250.82                  | 0.28528                | YES             | YES   |
|   | 34   | a        | 260.98                  | 0.06373                | YES             | YES   |
|   | 35   | a        | 293.01                  | 0.12201                | YES             | YES   |
|   | 36   | a        | 319.69                  | 4.39261                | YES             | YES   |
|   | 37   | a        | 337.75                  | 4.13786                | YES             | YES   |
|   | 38   | a        | 364.47                  | 3.52406                | YES             | YES   |
|   | 39   | a        | 387.66                  | 2.19276                | YES             | YES   |
|   | 40   | a        | 400.14                  | 0.42898                | YES             | YES   |
|   | 41   | a        | 401.41                  | 0.15064                | YES             | YES   |
|   | 42   | a        | 426.70                  | 1.66304                | YES             | YES   |
|   | 43   | a        | 441.21                  | 13.80089               | YES             | YES   |
|   | 44   | a        | 447.88                  | 0.16682                | YES             | YES   |
|   | 45   | a        | 456.14                  | 2.72252                | YES             | YES   |
|   | 46   | a        | 463.93                  | 2.63819                | YES             | YES   |
|   | 47   | a        | 466.75                  | 2.08337                | YES             | YES   |
|   | 48   | a        | 478.66                  | 1.74876                | YES             | YES   |
|   | 49   | a        | 489.42                  | 2.32141                | YES             | YES   |
|   | 50   | a        | 498.68                  | 7.04635                | YES             | YES   |

**TS<sub>23da</sub>**

SCF Energy (au) BP86/SV(P) -2408.995112972  
SCF Energy (au) PBE0/def2-TZVPP -2408.528811114  
SCF Energy (au) PBE0/def2-TZVPP -2408.5368518917 (Toluene Correction)  
Zero Point Energy (au) 0.3176652  
Chemical Potential (kJ mol<sup>-1</sup>) 684.72  
Dispersion Correction (au) PBE0/def2-TZVPP -0.06668154

xyz coordinates

45

|    |            |            |            |
|----|------------|------------|------------|
| Mn | 1.7275223  | 0.7999167  | 0.3898309  |
| C  | 2.0895483  | 1.0816028  | 2.1407390  |
| C  | 3.4216148  | 0.2952688  | 0.0980376  |
| C  | 2.1216996  | 2.5065434  | -0.0548414 |
| O  | 2.3942681  | 3.6123101  | -0.3122392 |
| O  | 4.5224521  | -0.0452347 | -0.0826326 |
| O  | 2.3138259  | 1.2506852  | 3.2695325  |
| C  | -1.0696555 | 0.1494737  | 1.1735573  |
| C  | -0.9452402 | 2.3772016  | 0.4726763  |
| C  | -2.3206936 | 2.5655412  | 0.6310084  |
| C  | -3.0971991 | 1.4675657  | 1.0421106  |
| C  | -2.4752166 | 0.2452548  | 1.3058193  |
| N  | -0.3278659 | -0.9901403 | 1.4304791  |
| C  | 1.0302861  | -1.0331570 | 0.9837798  |
| C  | 1.5669268  | -2.2391538 | 1.4195374  |
| C  | 0.5609475  | -2.9614117 | 2.1463357  |
| C  | -0.6310173 | -2.1594269 | 2.1567726  |
| H  | -0.3007874 | 3.1946902  | 0.1159326  |
| H  | -2.7694426 | 3.5462976  | 0.4137220  |
| H  | -4.1910040 | 1.5577266  | 1.1436460  |
| H  | -3.0675080 | -0.6361346 | 1.5774146  |
| H  | 2.5910470  | -2.5809008 | 1.2200111  |
| C  | -1.7803764 | -2.5716864 | 2.8541962  |
| N  | -0.3242258 | 1.2063843  | 0.7356993  |
| C  | 0.6087933  | 1.1297135  | -2.7764697 |
| C  | 1.3596298  | 2.2162507  | -3.2967806 |
| C  | 0.9857201  | 2.8322139  | -4.4990762 |
| C  | -0.1538459 | 2.4000883  | -5.2007365 |
| C  | -0.9146119 | 1.3319305  | -4.6916026 |
| C  | -0.5397590 | 0.7000288  | -3.4987574 |
| H  | 2.2522018  | 2.5678695  | -2.7584966 |
| H  | 1.5912388  | 3.6665749  | -4.8906988 |
| H  | -0.4499531 | 2.8952950  | -6.1401784 |
| H  | -1.8107552 | 0.9834489  | -5.2321667 |
| H  | -1.1366376 | -0.1372632 | -3.1019966 |
| C  | 0.9754901  | 0.4321249  | -1.5662732 |
| C  | 1.1101977  | -0.7218231 | -1.0021441 |
| H  | 1.2974738  | -1.7667095 | -1.2600597 |
| C  | -1.7454693 | -3.8123328 | 3.5148773  |
| H  | -2.6863943 | -1.9549698 | 2.9228964  |
| H  | -2.6384791 | -4.1486237 | 4.0663696  |
| C  | -0.5891616 | -4.6246356 | 3.4900499  |
| H  | -0.5951833 | -5.5931240 | 4.0167712  |
| C  | 0.5654396  | -4.2057824 | 2.8175284  |
| H  | 1.4741595  | -4.8294912 | 2.8158191  |

\$vibrational spectrum

| # | mode | symmetry | wave number | IR intensity | selection rules |
|---|------|----------|-------------|--------------|-----------------|
| # |      |          | cm**(-1)    | km/mol       | IR RAMAN        |
|   | 1    | a        | -237.37     | 0.00000      | YES YES         |
|   | 2    |          | 0.00        | 0.00000      | - -             |
|   | 3    |          | 0.00        | 0.00000      | - -             |

|    |   |        |          |     |     |
|----|---|--------|----------|-----|-----|
| 4  |   | 0.00   | 0.00000  | -   | -   |
| 5  |   | 0.00   | 0.00000  | -   | -   |
| 6  |   | 0.00   | 0.00000  | -   | -   |
| 7  |   | 0.00   | 0.00000  | -   | -   |
| 8  | a | 16.90  | 0.00794  | YES | YES |
| 9  | a | 27.26  | 0.08611  | YES | YES |
| 10 | a | 33.16  | 0.11095  | YES | YES |
| 11 | a | 54.27  | 0.16625  | YES | YES |
| 12 | a | 68.89  | 0.30671  | YES | YES |
| 13 | a | 73.22  | 0.49740  | YES | YES |
| 14 | a | 76.42  | 0.13529  | YES | YES |
| 15 | a | 84.67  | 0.22794  | YES | YES |
| 16 | a | 93.42  | 0.06507  | YES | YES |
| 17 | a | 100.15 | 0.60557  | YES | YES |
| 18 | a | 107.55 | 0.04497  | YES | YES |
| 19 | a | 128.61 | 0.17288  | YES | YES |
| 20 | a | 137.13 | 0.25235  | YES | YES |
| 21 | a | 158.03 | 4.13126  | YES | YES |
| 22 | a | 169.02 | 0.72987  | YES | YES |
| 23 | a | 200.40 | 1.72411  | YES | YES |
| 24 | a | 211.16 | 2.18243  | YES | YES |
| 25 | a | 236.27 | 3.70321  | YES | YES |
| 26 | a | 239.25 | 2.39867  | YES | YES |
| 27 | a | 250.95 | 1.06395  | YES | YES |
| 28 | a | 300.23 | 1.10439  | YES | YES |
| 29 | a | 336.42 | 8.93386  | YES | YES |
| 30 | a | 362.82 | 4.04049  | YES | YES |
| 31 | a | 364.60 | 3.32119  | YES | YES |
| 32 | a | 400.79 | 6.52216  | YES | YES |
| 33 | a | 402.21 | 0.08097  | YES | YES |
| 34 | a | 425.77 | 8.35193  | YES | YES |
| 35 | a | 433.33 | 1.36559  | YES | YES |
| 36 | a | 451.84 | 7.72534  | YES | YES |
| 37 | a | 467.18 | 1.43404  | YES | YES |
| 38 | a | 482.53 | 1.07415  | YES | YES |
| 39 | a | 489.01 | 7.91623  | YES | YES |
| 40 | a | 497.36 | 1.87821  | YES | YES |
| 41 | a | 502.11 | 2.52264  | YES | YES |
| 42 | a | 513.86 | 2.19350  | YES | YES |
| 43 | a | 528.63 | 4.72170  | YES | YES |
| 44 | a | 536.72 | 19.06779 | YES | YES |
| 45 | a | 546.95 | 16.32610 | YES | YES |
| 46 | a | 566.74 | 0.55150  | YES | YES |
| 47 | a | 573.19 | 9.51230  | YES | YES |
| 48 | a | 590.52 | 8.76627  | YES | YES |
| 49 | a | 605.37 | 8.55967  | YES | YES |
| 50 | a | 611.88 | 3.41869  | YES | YES |

**TS<sub>23da'</sub>**

SCF Energy (au) BP86/SV(P) -2408.986641492  
SCF Energy (au) PBE0/def2-TZVPP -2408.520986012  
SCF Energy (au) PBE0/def2-TZVPP -2408.5290620226 (Toluene Correction)  
Zero Point Energy (au) 0.3174132  
Chemical Potential (kJ mol<sup>-1</sup>) 684.77  
Dispersion Correction (au) PBE0/def2-TZVPP -0.06880878

xyz coordinates

45

|    |            |            |            |
|----|------------|------------|------------|
| Mn | 1.3929405  | 2.1179321  | 0.0346053  |
| C  | 1.5920354  | 2.4758324  | 1.8024534  |
| C  | 3.1193805  | 1.6611721  | -0.0761235 |
| C  | 1.7583553  | 3.8001150  | -0.4949705 |
| O  | 1.9946440  | 4.8771940  | -0.8799786 |
| O  | 4.2431992  | 1.3514463  | -0.1390355 |
| O  | 1.7222591  | 2.7126864  | 2.9351880  |
| C  | -1.4348519 | 1.3721376  | 0.6037112  |
| C  | -1.3380177 | 3.5979133  | -0.0999468 |
| C  | -2.7269111 | 3.7407853  | -0.0340012 |
| C  | -3.4928823 | 2.6191133  | 0.3312722  |
| C  | -2.8484693 | 1.4195798  | 0.6425246  |
| N  | -0.6766299 | 0.2559087  | 0.9168210  |
| C  | 0.7030024  | 0.2367931  | 0.5363423  |
| C  | 1.2498842  | -0.9340909 | 1.0457297  |
| C  | 0.2394481  | -1.6424615 | 1.7795163  |
| C  | -0.9732203 | -0.8764538 | 1.7014801  |
| H  | -0.6975913 | 4.4361886  | -0.4145309 |
| H  | -3.1929470 | 4.7058657  | -0.2834772 |
| H  | -4.5933515 | 2.6730763  | 0.3596596  |
| H  | -3.4263285 | 0.5176568  | 0.8777316  |
| H  | 2.2870153  | -1.2597861 | 0.8958340  |
| C  | -2.1347038 | -1.2771142 | 2.3859537  |
| N  | -0.6966783 | 2.4499950  | 0.2097932  |
| H  | 0.8708690  | 2.2675579  | -2.8666379 |
| C  | 0.9239950  | 1.7187705  | -1.9211631 |
| C  | 0.8921691  | 0.5014069  | -1.4887468 |
| C  | 1.0615201  | -0.8629432 | -2.0061543 |
| C  | -2.0883262 | -2.4734346 | 3.1229722  |
| H  | -3.0576234 | -0.6815185 | 2.3865140  |
| H  | -2.9892199 | -2.8001588 | 3.6674636  |
| C  | -0.9111694 | -3.2539717 | 3.1835882  |
| H  | -0.9094097 | -4.1884285 | 3.7685879  |
| C  | 0.2537007  | -2.8445431 | 2.5232639  |
| H  | 1.1781725  | -3.4410599 | 2.5878421  |
| C  | 1.3873297  | -3.4133154 | -3.1850301 |
| C  | 2.3456125  | -2.4095796 | -3.4036839 |
| C  | 2.1833224  | -1.1409638 | -2.8239487 |
| C  | 0.1079126  | -1.8843728 | -1.7845339 |
| C  | 0.2664994  | -3.1444326 | -2.3776991 |
| H  | 1.5134272  | -4.4086686 | -3.6423504 |
| H  | 3.2295294  | -2.6135106 | -4.0305493 |
| H  | 2.9334823  | -0.3513558 | -2.9890131 |
| H  | -0.7698230 | -1.6806500 | -1.1517711 |
| H  | -0.4915512 | -3.9263131 | -2.2055020 |

\$vibrational spectrum

| # | mode | symmetry | wave number | IR intensity | selection rules |
|---|------|----------|-------------|--------------|-----------------|
| # |      |          | cm** (-1)   | km/mol       | IR RAMAN        |
|   | 1    | a        | -287.82     | 0.00000      | YES YES         |
|   | 2    |          | 0.00        | 0.00000      | - -             |

|    |   |        |          |     |     |
|----|---|--------|----------|-----|-----|
| 3  |   | 0.00   | 0.00000  | -   | -   |
| 4  |   | 0.00   | 0.00000  | -   | -   |
| 5  |   | 0.00   | 0.00000  | -   | -   |
| 6  |   | 0.00   | 0.00000  | -   | -   |
| 7  |   | 0.00   | 0.00000  | -   | -   |
| 8  | a | 20.67  | 0.60655  | YES | YES |
| 9  | a | 28.74  | 0.41890  | YES | YES |
| 10 | a | 42.36  | 0.06185  | YES | YES |
| 11 | a | 48.42  | 0.04076  | YES | YES |
| 12 | a | 62.97  | 0.44129  | YES | YES |
| 13 | a | 71.63  | 0.08685  | YES | YES |
| 14 | a | 77.65  | 0.26895  | YES | YES |
| 15 | a | 86.77  | 0.22815  | YES | YES |
| 16 | a | 89.66  | 0.18222  | YES | YES |
| 17 | a | 96.58  | 0.02826  | YES | YES |
| 18 | a | 102.25 | 0.40104  | YES | YES |
| 19 | a | 131.02 | 0.25623  | YES | YES |
| 20 | a | 132.36 | 0.74006  | YES | YES |
| 21 | a | 161.35 | 2.79207  | YES | YES |
| 22 | a | 176.38 | 7.58770  | YES | YES |
| 23 | a | 197.25 | 1.11695  | YES | YES |
| 24 | a | 205.64 | 1.84132  | YES | YES |
| 25 | a | 228.37 | 3.45227  | YES | YES |
| 26 | a | 233.19 | 0.79052  | YES | YES |
| 27 | a | 255.52 | 1.79123  | YES | YES |
| 28 | a | 300.11 | 0.94208  | YES | YES |
| 29 | a | 326.31 | 4.03321  | YES | YES |
| 30 | a | 363.15 | 4.81019  | YES | YES |
| 31 | a | 367.03 | 1.79414  | YES | YES |
| 32 | a | 402.97 | 0.07985  | YES | YES |
| 33 | a | 416.28 | 5.42703  | YES | YES |
| 34 | a | 433.86 | 0.86468  | YES | YES |
| 35 | a | 456.32 | 1.84925  | YES | YES |
| 36 | a | 458.93 | 1.96833  | YES | YES |
| 37 | a | 474.37 | 5.79367  | YES | YES |
| 38 | a | 484.31 | 0.73568  | YES | YES |
| 39 | a | 493.32 | 9.72999  | YES | YES |
| 40 | a | 497.86 | 19.72214 | YES | YES |
| 41 | a | 504.56 | 1.35928  | YES | YES |
| 42 | a | 516.71 | 2.70257  | YES | YES |
| 43 | a | 530.08 | 20.04411 | YES | YES |
| 44 | a | 538.14 | 5.12531  | YES | YES |
| 45 | a | 554.22 | 11.05044 | YES | YES |
| 46 | a | 555.69 | 18.32082 | YES | YES |
| 47 | a | 567.67 | 1.46299  | YES | YES |
| 48 | a | 591.43 | 10.61040 | YES | YES |
| 49 | a | 611.96 | 3.40366  | YES | YES |
| 50 | a | 613.21 | 0.62181  | YES | YES |

**TS<sub>23ea</sub>**

|                                            |                                       |
|--------------------------------------------|---------------------------------------|
| SCF Energy (au) BP86/SV(P)                 | -2583.753044495                       |
| SCF Energy (au) PBE0/def2-TZVPP            | -2583.299586047                       |
| SCF Energy (au) PBE0/def2-TZVPP            | -2583.3092723309 (Toluene Correction) |
| Zero Point Energy (au)                     | 0.3857030                             |
| Chemical Potential (kJ mol <sup>-1</sup> ) | 843.61                                |
| Dispersion Correction (au) PBE0/def2-TZVPP | -0.07220089                           |

xyz coordinates

53

|    |            |            |            |
|----|------------|------------|------------|
| Mn | 2.3833058  | 0.8483205  | 0.3108484  |
| C  | 2.6727450  | 1.1691657  | 2.0615271  |
| C  | 4.1166155  | 0.4487440  | 0.0725329  |
| C  | 2.6466621  | 2.5783517  | -0.1538424 |
| O  | 2.8190904  | 3.7029692  | -0.4141811 |
| O  | 5.2432486  | 0.1718222  | -0.0696683 |
| O  | 2.8494658  | 1.3606284  | 3.1967976  |
| C  | -0.4004547 | 0.1554101  | 0.9220468  |
| C  | -1.8785234 | 0.2888813  | 0.9662264  |
| C  | 0.3311949  | -1.0383896 | 1.3080514  |
| C  | 1.7274833  | -1.0184595 | 0.9764134  |
| C  | 2.5353600  | -2.1001426 | 1.4115396  |
| C  | 1.9793464  | -3.1718278 | 2.1320991  |
| C  | 0.5878700  | -3.1897654 | 2.4353188  |
| C  | -0.2173080 | -2.1328742 | 2.0301947  |
| H  | 3.6098354  | -2.0926353 | 1.1731258  |
| O  | 2.6855051  | -4.2349131 | 2.6000951  |
| H  | 0.1863604  | -4.0397473 | 3.0079205  |
| H  | -1.2853858 | -2.1288864 | 2.3014784  |
| N  | 0.3690596  | 1.1381350  | 0.5004391  |
| C  | 1.2656167  | 0.9684925  | -2.9026942 |
| C  | 1.7993636  | 2.1870718  | -3.3979245 |
| C  | 1.3830038  | 2.7006197  | -4.6345102 |
| C  | 0.4137082  | 2.0276644  | -5.3995675 |
| C  | -0.1341568 | 0.8245695  | -4.9168780 |
| C  | 0.2844428  | 0.2986441  | -3.6880383 |
| H  | 2.5531545  | 2.7282996  | -2.8080934 |
| H  | 1.8191197  | 3.6441258  | -5.0027592 |
| H  | 0.0829049  | 2.4402888  | -6.3669099 |
| H  | -0.8972491 | 0.2883857  | -5.5058238 |
| H  | -0.1471660 | -0.6420084 | -3.3100178 |
| C  | 1.6874677  | 0.3688457  | -1.6591208 |
| C  | 1.9467988  | -0.7307784 | -1.0314793 |
| H  | 2.2581332  | -1.7603291 | -1.2274445 |
| C  | -4.7037107 | 0.6189425  | 0.9711380  |
| C  | -4.1194987 | -0.5712115 | 0.4755624  |
| C  | -2.7333012 | -0.7332381 | 0.4793554  |
| C  | -2.4747491 | 1.4726042  | 1.4537188  |
| C  | -3.8675218 | 1.6450218  | 1.4648803  |
| O  | -6.0608174 | 0.6777296  | 0.9309396  |
| H  | -4.7856424 | -1.3557750 | 0.0837907  |
| H  | -2.2967469 | -1.6576109 | 0.0685523  |
| H  | -1.8356938 | 2.2731621  | 1.8627868  |
| H  | -4.2889202 | 2.5770713  | 1.8687505  |
| H  | -0.1328790 | 1.9651192  | 0.1475545  |
| C  | 4.0842964  | -4.2897159 | 2.3632922  |
| C  | -6.7122521 | 1.8464633  | 1.4041348  |
| H  | 4.6123053  | -3.4217927 | 2.8227643  |
| H  | 4.3166356  | -4.3214205 | 1.2730434  |
| H  | 4.4385375  | -5.2266522 | 2.8382625  |
| H  | -6.5048590 | 2.0246182  | 2.4856943  |
| H  | -7.7977912 | 1.6687913  | 1.2676145  |



H -6.4140099 2.7492149 0.8204629

\$vibrational spectrum

| #  | mode | symmetry | wave number<br>cm**(-1) | IR intensity<br>km/mol | selection rules |       |
|----|------|----------|-------------------------|------------------------|-----------------|-------|
| #  |      |          |                         |                        | IR              | RAMAN |
| 1  |      | a        | -208.55                 | 0.00000                | YES             | YES   |
| 2  |      |          | 0.00                    | 0.00000                | -               | -     |
| 3  |      |          | 0.00                    | 0.00000                | -               | -     |
| 4  |      |          | 0.00                    | 0.00000                | -               | -     |
| 5  |      |          | 0.00                    | 0.00000                | -               | -     |
| 6  |      |          | 0.00                    | 0.00000                | -               | -     |
| 7  |      |          | 0.00                    | 0.00000                | -               | -     |
| 8  |      | a        | 15.47                   | 0.07161                | YES             | YES   |
| 9  |      | a        | 16.51                   | 0.10232                | YES             | YES   |
| 10 |      | a        | 33.01                   | 0.47225                | YES             | YES   |
| 11 |      | a        | 38.56                   | 0.38207                | YES             | YES   |
| 12 |      | a        | 43.92                   | 0.70894                | YES             | YES   |
| 13 |      | a        | 46.39                   | 0.32732                | YES             | YES   |
| 14 |      | a        | 61.18                   | 0.20756                | YES             | YES   |
| 15 |      | a        | 73.20                   | 0.46680                | YES             | YES   |
| 16 |      | a        | 75.48                   | 0.18658                | YES             | YES   |
| 17 |      | a        | 86.94                   | 0.06247                | YES             | YES   |
| 18 |      | a        | 89.04                   | 0.29431                | YES             | YES   |
| 19 |      | a        | 97.18                   | 0.31965                | YES             | YES   |
| 20 |      | a        | 105.22                  | 2.00191                | YES             | YES   |
| 21 |      | a        | 113.00                  | 0.98813                | YES             | YES   |
| 22 |      | a        | 125.65                  | 0.79241                | YES             | YES   |
| 23 |      | a        | 134.73                  | 1.05068                | YES             | YES   |
| 24 |      | a        | 151.30                  | 1.78706                | YES             | YES   |
| 25 |      | a        | 160.31                  | 1.44935                | YES             | YES   |
| 26 |      | a        | 179.53                  | 0.32215                | YES             | YES   |
| 27 |      | a        | 188.52                  | 0.23415                | YES             | YES   |
| 28 |      | a        | 197.77                  | 0.33095                | YES             | YES   |
| 29 |      | a        | 213.48                  | 0.36455                | YES             | YES   |
| 30 |      | a        | 233.72                  | 0.26149                | YES             | YES   |
| 31 |      | a        | 241.14                  | 0.49848                | YES             | YES   |
| 32 |      | a        | 260.07                  | 0.76530                | YES             | YES   |
| 33 |      | a        | 265.83                  | 2.10419                | YES             | YES   |
| 34 |      | a        | 297.40                  | 3.78161                | YES             | YES   |
| 35 |      | a        | 321.18                  | 0.63206                | YES             | YES   |
| 36 |      | a        | 338.79                  | 4.50691                | YES             | YES   |
| 37 |      | a        | 342.71                  | 7.05066                | YES             | YES   |
| 38 |      | a        | 367.37                  | 3.38791                | YES             | YES   |
| 39 |      | a        | 401.37                  | 1.93286                | YES             | YES   |
| 40 |      | a        | 402.87                  | 0.12617                | YES             | YES   |
| 41 |      | a        | 416.51                  | 0.58616                | YES             | YES   |
| 42 |      | a        | 418.70                  | 2.95551                | YES             | YES   |
| 43 |      | a        | 435.27                  | 1.24917                | YES             | YES   |
| 44 |      | a        | 449.98                  | 3.46461                | YES             | YES   |
| 45 |      | a        | 454.81                  | 2.85799                | YES             | YES   |
| 46 |      | a        | 468.62                  | 10.92685               | YES             | YES   |
| 47 |      | a        | 482.98                  | 0.52244                | YES             | YES   |
| 48 |      | a        | 493.07                  | 3.92736                | YES             | YES   |
| 49 |      | a        | 499.16                  | 7.85117                | YES             | YES   |
| 50 |      | a        | 501.98                  | 5.34270                | YES             | YES   |

**TS<sub>23ea</sub>'**

|                                            |                                       |
|--------------------------------------------|---------------------------------------|
| SCF Energy (au) BP86/SV(P)                 | -2583.738258985                       |
| SCF Energy (au) PBE0/def2-TZVPP            | -2583.285628368                       |
| SCF Energy (au) PBE0/def2-TZVPP            | -2583.2957410864 (Toluene Correction) |
| Zero Point Energy (au)                     | 0.3849902                             |
| Chemical Potential (kJ mol <sup>-1</sup> ) | 841.35                                |
| Dispersion Correction (au) PBE0/def2-TZVPP | -0.07451576                           |

xyz coordinates

53

|    |            |            |            |
|----|------------|------------|------------|
| Mn | 2.1746510  | 1.9645105  | -0.4690860 |
| C  | 2.6450634  | 2.4259098  | 1.2145880  |
| C  | 3.8781896  | 1.5626495  | -0.8563270 |
| C  | 2.3534054  | 3.6185339  | -1.1566146 |
| O  | 2.4489731  | 4.6785438  | -1.6355252 |
| O  | 4.9897225  | 1.2963138  | -1.1038729 |
| O  | 2.9325961  | 2.7213873  | 2.3051651  |
| C  | -0.5284013 | 1.3313376  | 0.5157799  |
| C  | 0.2253290  | 0.1323297  | 0.8434505  |
| C  | 1.5604853  | 0.0882302  | 0.2933244  |
| C  | 2.4022337  | -0.9653433 | 0.7115988  |
| C  | 1.9613766  | -1.9532893 | 1.6126250  |
| C  | 0.6165517  | -1.9494312 | 2.0721544  |
| C  | -0.2359884 | -0.9152057 | 1.6749787  |
| H  | 3.4304513  | -1.0539457 | 0.3266320  |
| O  | 2.8839293  | -2.8864229 | 1.9698074  |
| H  | 0.2372654  | -2.7409785 | 2.7340992  |
| H  | -1.2772839 | -0.9105281 | 2.0351930  |
| N  | 0.1895135  | 2.2659540  | -0.0653128 |
| H  | 1.0940955  | 1.7766872  | -3.2253331 |
| C  | 1.3346492  | 1.3755574  | -2.2357727 |
| C  | 1.5101649  | 0.2213884  | -1.6611739 |
| C  | 1.7568852  | -1.1496442 | -2.1513247 |
| C  | 2.1801818  | -3.7175437 | -3.2623512 |
| C  | 3.0246732  | -2.6504279 | -3.6120825 |
| C  | 2.8127054  | -1.3738298 | -3.0662641 |
| C  | 0.9208420  | -2.2337256 | -1.7958153 |
| C  | 1.1257378  | -3.5032770 | -2.3559522 |
| H  | 2.3440281  | -4.7186166 | -3.6948865 |
| H  | 3.8567578  | -2.8102906 | -4.3178720 |
| H  | 3.4747769  | -0.5355053 | -3.3349262 |
| H  | 0.0965800  | -2.0672438 | -1.0839022 |
| H  | 0.4559344  | -4.3353256 | -2.0814602 |
| H  | -0.3288160 | 3.1216373  | -0.3112567 |
| C  | -1.9823949 | 1.5233350  | 0.7739732  |
| C  | -4.7489168 | 1.9946365  | 1.2280657  |
| C  | -3.8909273 | 1.6593259  | 2.3018371  |
| C  | -2.5326718 | 1.4245519  | 2.0765794  |
| C  | -2.8455695 | 1.8705045  | -0.2867300 |
| C  | -4.2146754 | 2.1003417  | -0.0747566 |
| O  | -6.0547404 | 2.1985750  | 1.5494690  |
| H  | -4.3200517 | 1.5997385  | 3.3143149  |
| H  | -1.8771432 | 1.1958545  | 2.9321193  |
| H  | -2.4418454 | 1.9427006  | -1.3104591 |
| H  | -4.8538629 | 2.3556583  | -0.9324763 |
| C  | -6.9667337 | 2.5488890  | 0.5205927  |
| H  | -7.0386567 | 1.7516628  | -0.2567495 |
| H  | -6.6867477 | 3.5119097  | 0.0316236  |
| H  | -7.9533948 | 2.6655222  | 1.0119679  |
| C  | 2.5211775  | -3.9033562 | 2.8892150  |
| H  | 1.7176168  | -4.5622496 | 2.4824823  |
| H  | 2.1870458  | -3.4786642 | 3.8650232  |

H 3.4352328 -4.5093316 3.0516238

\$vibrational spectrum

| #  | mode | symmetry | wave number<br>cm**(-1) | IR intensity<br>km/mol | selection rules |       |
|----|------|----------|-------------------------|------------------------|-----------------|-------|
| #  |      |          |                         |                        | IR              | RAMAN |
| 1  |      | a        | -296.98                 | 0.00000                | YES             | YES   |
| 2  |      |          | 0.00                    | 0.00000                | -               | -     |
| 3  |      |          | 0.00                    | 0.00000                | -               | -     |
| 4  |      |          | 0.00                    | 0.00000                | -               | -     |
| 5  |      |          | 0.00                    | 0.00000                | -               | -     |
| 6  |      |          | 0.00                    | 0.00000                | -               | -     |
| 7  |      |          | 0.00                    | 0.00000                | -               | -     |
| 8  |      | a        | 18.22                   | 0.22944                | YES             | YES   |
| 9  |      | a        | 24.31                   | 0.09629                | YES             | YES   |
| 10 |      | a        | 29.57                   | 0.35562                | YES             | YES   |
| 11 |      | a        | 32.77                   | 0.12955                | YES             | YES   |
| 12 |      | a        | 43.30                   | 0.28450                | YES             | YES   |
| 13 |      | a        | 48.40                   | 1.17254                | YES             | YES   |
| 14 |      | a        | 52.25                   | 0.33172                | YES             | YES   |
| 15 |      | a        | 65.12                   | 0.13582                | YES             | YES   |
| 16 |      | a        | 78.99                   | 0.14413                | YES             | YES   |
| 17 |      | a        | 85.48                   | 0.13030                | YES             | YES   |
| 18 |      | a        | 86.69                   | 0.50394                | YES             | YES   |
| 19 |      | a        | 94.09                   | 0.75043                | YES             | YES   |
| 20 |      | a        | 99.10                   | 2.62791                | YES             | YES   |
| 21 |      | a        | 100.03                  | 0.58182                | YES             | YES   |
| 22 |      | a        | 125.70                  | 0.20917                | YES             | YES   |
| 23 |      | a        | 143.38                  | 0.32313                | YES             | YES   |
| 24 |      | a        | 145.97                  | 0.79017                | YES             | YES   |
| 25 |      | a        | 152.13                  | 1.76887                | YES             | YES   |
| 26 |      | a        | 177.98                  | 0.13994                | YES             | YES   |
| 27 |      | a        | 193.14                  | 1.65087                | YES             | YES   |
| 28 |      | a        | 203.26                  | 3.59753                | YES             | YES   |
| 29 |      | a        | 208.08                  | 0.83531                | YES             | YES   |
| 30 |      | a        | 231.47                  | 1.19931                | YES             | YES   |
| 31 |      | a        | 239.87                  | 1.29797                | YES             | YES   |
| 32 |      | a        | 244.45                  | 2.03842                | YES             | YES   |
| 33 |      | a        | 253.73                  | 1.06308                | YES             | YES   |
| 34 |      | a        | 288.48                  | 1.17820                | YES             | YES   |
| 35 |      | a        | 306.57                  | 4.12109                | YES             | YES   |
| 36 |      | a        | 314.39                  | 1.27095                | YES             | YES   |
| 37 |      | a        | 332.66                  | 0.94044                | YES             | YES   |
| 38 |      | a        | 355.46                  | 0.48843                | YES             | YES   |
| 39 |      | a        | 402.18                  | 0.02761                | YES             | YES   |
| 40 |      | a        | 411.11                  | 4.82695                | YES             | YES   |
| 41 |      | a        | 412.86                  | 3.42446                | YES             | YES   |
| 42 |      | a        | 423.23                  | 0.47428                | YES             | YES   |
| 43 |      | a        | 452.15                  | 0.15110                | YES             | YES   |
| 44 |      | a        | 459.15                  | 2.51377                | YES             | YES   |
| 45 |      | a        | 466.24                  | 2.50035                | YES             | YES   |
| 46 |      | a        | 479.31                  | 5.60076                | YES             | YES   |
| 47 |      | a        | 491.13                  | 4.47747                | YES             | YES   |
| 48 |      | a        | 495.62                  | 4.84184                | YES             | YES   |
| 49 |      | a        | 499.16                  | 4.12463                | YES             | YES   |
| 50 |      | a        | 512.83                  | 3.08282                | YES             | YES   |

**TS<sub>23ej</sub>**

|                                            |                                       |
|--------------------------------------------|---------------------------------------|
| SCF Energy (au) BP86/SV(P)                 | -2814.645959297                       |
| SCF Energy (au) PBE0/def2-TZVPP            | -2814.155882277                       |
| SCF Energy (au) PBE0/def2-TZVPP            | -2814.1661111849 (Toluene Correction) |
| Zero Point Energy (au)                     | 0.4648176                             |
| Chemical Potential (kJ mol <sup>-1</sup> ) | 1034.42                               |
| Dispersion Correction (au) PBE0/def2-TZVPP | -0.09273178                           |

xyz coordinates

63

|    |            |            |            |
|----|------------|------------|------------|
| Mn | 1.9306911  | 1.4020002  | 0.6830458  |
| C  | 2.1838181  | 1.7355158  | 2.4392325  |
| C  | 3.6641337  | 0.9860875  | 0.4910235  |
| C  | 2.2510348  | 3.1212471  | 0.2232937  |
| O  | 2.4712664  | 4.2408521  | -0.0256646 |
| O  | 4.7959451  | 0.7116684  | 0.3802884  |
| O  | 2.3372093  | 1.9384693  | 3.5758549  |
| C  | -0.8818569 | 0.7680615  | 1.2417821  |
| C  | -2.3576784 | 0.9247761  | 1.2413331  |
| C  | -0.1766581 | -0.4235535 | 1.6783525  |
| C  | 1.2250130  | -0.4418934 | 1.3598469  |
| C  | 2.0102907  | -1.5083179 | 1.8635362  |
| C  | 1.4349860  | -2.5222176 | 2.6499970  |
| C  | 0.0410310  | -2.5039740 | 2.9385402  |
| C  | -0.7481153 | -1.4663571 | 2.4562785  |
| H  | 3.0839960  | -1.5361476 | 1.6273815  |
| O  | 2.1235925  | -3.5612119 | 3.1902086  |
| H  | -0.3769380 | -3.3106860 | 3.5600084  |
| H  | -1.8189575 | -1.4320486 | 2.7145749  |
| N  | -0.0842866 | 1.7267082  | 0.8160727  |
| C  | 0.8260154  | 1.4855016  | -2.5115280 |
| C  | 1.2304284  | 2.7687591  | -2.9640986 |
| C  | 0.8216903  | 3.2503419  | -4.2164899 |
| C  | -0.0126781 | 2.4769118  | -5.0424273 |
| C  | -0.4330863 | 1.2069388  | -4.6039751 |
| C  | -0.0216378 | 0.7153266  | -3.3591703 |
| H  | 1.8769689  | 3.3893508  | -2.3273141 |
| H  | 1.1563737  | 4.2473776  | -4.5482167 |
| H  | -0.3388016 | 2.8627253  | -6.0224091 |
| H  | -1.0902393 | 0.5914373  | -5.2412450 |
| H  | -0.3540159 | -0.2781091 | -3.0184706 |
| C  | 1.2445243  | 0.9213366  | -1.2469878 |
| C  | 1.4821055  | -0.2274950 | -0.6770971 |
| C  | 1.9529371  | -1.5431340 | -1.1375304 |
| C  | -5.1764461 | 1.2964760  | 1.1526703  |
| C  | -4.5985342 | 0.0748947  | 0.7319111  |
| C  | -3.2157782 | -0.1069035 | 0.7812849  |
| C  | -2.9480030 | 2.1390221  | 1.6560944  |
| C  | -4.3374039 | 2.3326881  | 1.6198692  |
| O  | -6.5306659 | 1.3738259  | 1.0713401  |
| H  | -5.2665135 | -0.7177467 | 0.3601128  |
| H  | -2.7833855 | -1.0560987 | 0.4266622  |
| H  | -2.3076940 | 2.9487000  | 2.0447980  |
| H  | -4.7543672 | 3.2893905  | 1.9665970  |
| H  | -0.5606966 | 2.5486784  | 0.4189116  |
| C  | 3.5214601  | -3.6573375 | 2.9519756  |
| C  | -7.1755115 | 2.5746779  | 1.4668446  |
| H  | 4.0669060  | -2.7732336 | 3.3570887  |
| H  | 3.7460199  | -3.7599460 | 1.8653516  |
| H  | 3.8590608  | -4.5694592 | 3.4840392  |
| H  | -6.9955334 | 2.8036794  | 2.5436660  |
| H  | -8.2595994 | 2.4068834  | 1.3080940  |

|   |            |            |            |
|---|------------|------------|------------|
| H | -6.8460474 | 3.4422745  | 0.8477132  |
| C | 2.8241651  | -4.0194464 | -2.2026938 |
| C | 3.5730824  | -2.8515251 | -2.4278871 |
| C | 3.1401779  | -1.6223110 | -1.9054453 |
| C | 1.2125691  | -2.7276841 | -0.9091549 |
| C | 1.6404862  | -3.9514904 | -1.4459562 |
| H | 3.1613463  | -4.9833076 | -2.6190666 |
| H | 4.5024448  | -2.8937399 | -3.0201148 |
| H | 3.7255107  | -0.7070230 | -2.0840277 |
| H | 0.2858002  | -2.6785507 | -0.3153716 |
| H | 1.0435503  | -4.8619399 | -1.2700714 |

\$vibrational spectrum

| # | mode | symmetry | wave number | IR intensity | selection rules |       |
|---|------|----------|-------------|--------------|-----------------|-------|
| # |      |          | cm**(-1)    | km/mol       | IR              | RAMAN |
|   | 1    | a        | -194.57     | 0.00000      | YES             | YES   |
|   | 2    |          | 0.00        | 0.00000      | -               | -     |
|   | 3    |          | 0.00        | 0.00000      | -               | -     |
|   | 4    |          | 0.00        | 0.00000      | -               | -     |
|   | 5    |          | 0.00        | 0.00000      | -               | -     |
|   | 6    |          | 0.00        | 0.00000      | -               | -     |
|   | 7    |          | 0.00        | 0.00000      | -               | -     |
|   | 8    | a        | 16.41       | 0.09106      | YES             | YES   |
|   | 9    | a        | 18.69       | 0.13939      | YES             | YES   |
|   | 10   | a        | 24.84       | 0.06883      | YES             | YES   |
|   | 11   | a        | 32.84       | 0.18714      | YES             | YES   |
|   | 12   | a        | 36.53       | 0.67747      | YES             | YES   |
|   | 13   | a        | 43.45       | 0.75136      | YES             | YES   |
|   | 14   | a        | 45.03       | 0.09858      | YES             | YES   |
|   | 15   | a        | 49.04       | 0.02101      | YES             | YES   |
|   | 16   | a        | 57.92       | 0.23317      | YES             | YES   |
|   | 17   | a        | 63.05       | 0.29982      | YES             | YES   |
|   | 18   | a        | 74.95       | 0.57612      | YES             | YES   |
|   | 19   | a        | 76.87       | 0.04162      | YES             | YES   |
|   | 20   | a        | 86.54       | 0.07244      | YES             | YES   |
|   | 21   | a        | 92.38       | 0.33303      | YES             | YES   |
|   | 22   | a        | 98.55       | 0.34466      | YES             | YES   |
|   | 23   | a        | 106.72      | 2.23100      | YES             | YES   |
|   | 24   | a        | 114.66      | 0.40203      | YES             | YES   |
|   | 25   | a        | 124.04      | 0.64485      | YES             | YES   |
|   | 26   | a        | 137.05      | 1.94375      | YES             | YES   |
|   | 27   | a        | 150.70      | 1.72182      | YES             | YES   |
|   | 28   | a        | 160.05      | 1.53666      | YES             | YES   |
|   | 29   | a        | 168.98      | 0.45894      | YES             | YES   |
|   | 30   | a        | 186.71      | 1.45702      | YES             | YES   |
|   | 31   | a        | 189.01      | 0.60705      | YES             | YES   |
|   | 32   | a        | 198.14      | 2.37796      | YES             | YES   |
|   | 33   | a        | 222.80      | 0.28299      | YES             | YES   |
|   | 34   | a        | 230.16      | 0.23786      | YES             | YES   |
|   | 35   | a        | 237.45      | 1.45215      | YES             | YES   |
|   | 36   | a        | 249.75      | 1.01148      | YES             | YES   |
|   | 37   | a        | 253.15      | 0.14093      | YES             | YES   |
|   | 38   | a        | 261.15      | 2.60947      | YES             | YES   |
|   | 39   | a        | 294.73      | 4.15721      | YES             | YES   |
|   | 40   | a        | 323.23      | 3.05680      | YES             | YES   |
|   | 41   | a        | 339.69      | 0.67976      | YES             | YES   |
|   | 42   | a        | 357.65      | 4.33796      | YES             | YES   |
|   | 43   | a        | 374.48      | 0.60465      | YES             | YES   |
|   | 44   | a        | 398.95      | 3.36470      | YES             | YES   |
|   | 45   | a        | 402.20      | 0.12622      | YES             | YES   |
|   | 46   | a        | 405.90      | 2.63261      | YES             | YES   |
|   | 47   | a        | 416.83      | 0.45536      | YES             | YES   |
|   | 48   | a        | 419.15      | 2.87869      | YES             | YES   |

|    |   |        |         |     |     |
|----|---|--------|---------|-----|-----|
| 49 | a | 435.25 | 1.41876 | YES | YES |
| 50 | a | 450.38 | 0.19487 | YES | YES |

**TS<sub>23fa</sub>**

SCF Energy (au) BP86/SV(P) -2391.953906106  
 SCF Energy (au) PBE0/def2-TZVPP -2391.506807198  
 SCF Energy (au) PBE0/def2-TZVPP -2391.5145469127 (Toluene Correction)  
 Zero Point Energy (au) 0.3208594  
 Chemical Potential (kJ mol<sup>-1</sup>) 692.48  
 Dispersion Correction (au) PBE0/def2-TZVPP -0.06636323

xyz coordinates

45

|    |            |            |            |
|----|------------|------------|------------|
| Mn | 1.6823049  | -0.1540813 | 0.7119304  |
| C  | 2.0823667  | 0.0299876  | 2.4662496  |
| C  | 3.3142989  | -0.7703630 | 0.3633362  |
| C  | 2.2916770  | 1.5080239  | 0.3104084  |
| O  | 2.8051040  | 2.5272816  | 0.0645810  |
| O  | 4.3832846  | -1.1888982 | 0.1417157  |
| O  | 2.3252325  | 0.1410141  | 3.5993230  |
| C  | -1.1529180 | -0.6715825 | 1.5897830  |
| C  | -0.9430170 | 1.5831402  | 0.9670982  |
| C  | -2.3147607 | 1.8220671  | 1.1899400  |
| C  | -3.1142375 | 0.7522986  | 1.6168280  |
| C  | -2.5383478 | -0.5024504 | 1.8168618  |
| C  | -0.4436773 | -1.9368414 | 1.7767137  |
| C  | 0.8891064  | -2.0045914 | 1.2620044  |
| C  | 1.6189977  | -3.2041245 | 1.4916431  |
| C  | 1.0557362  | -4.2830285 | 2.1764479  |
| C  | -0.2732070 | -4.2137822 | 2.6538585  |
| C  | -1.0127998 | -3.0473244 | 2.4508552  |
| O  | -0.0854716 | 2.5354261  | 0.5597101  |
| H  | -2.7477230 | 2.8191459  | 1.0333578  |
| H  | -4.1919682 | 0.9070197  | 1.7894065  |
| H  | -3.1526392 | -1.3556750 | 2.1355549  |
| H  | 2.6507360  | -3.2910846 | 1.1112435  |
| H  | 1.6561477  | -5.1924837 | 2.3484406  |
| H  | -0.7180477 | -5.0658746 | 3.1926922  |
| H  | -2.0376043 | -2.9848091 | 2.8513895  |
| N  | -0.3729834 | 0.3672597  | 1.1560503  |
| C  | 0.3526155  | 0.3818633  | -2.3524857 |
| C  | 0.9943495  | 1.5649540  | -2.8046371 |
| C  | 0.5520736  | 2.2219353  | -3.9617036 |
| C  | -0.5528760 | 1.7362858  | -4.6840251 |
| C  | -1.2105295 | 0.5744263  | -4.2394100 |
| C  | -0.7656216 | -0.0968195 | -3.0932606 |
| H  | 1.8555215  | 1.9605836  | -2.2470897 |
| H  | 1.0769613  | 3.1301816  | -4.3027952 |
| H  | -0.9020385 | 2.2615575  | -5.5884173 |
| H  | -2.0800711 | 0.1837491  | -4.7945666 |
| H  | -1.2829623 | -1.0061058 | -2.7462792 |
| C  | 0.7881228  | -0.3593225 | -1.1930104 |
| C  | 0.9329506  | -1.5439861 | -0.6899098 |
| H  | 1.0768716  | -2.5764308 | -1.0226138 |
| C  | -0.5505492 | 3.8496392  | 0.2821474  |
| H  | -1.3018194 | 3.8476272  | -0.5401194 |
| H  | 0.3453502  | 4.4159264  | -0.0394656 |
| H  | -0.9839389 | 4.3282658  | 1.1902184  |

\$vibrational spectrum

| # | mode | symmetry | wave number | IR intensity | selection rules |
|---|------|----------|-------------|--------------|-----------------|
| # |      |          | cm**(-1)    | km/mol       | IR RAMAN        |
| 1 |      | a        | -228.81     | 0.00000      | YES YES         |
| 2 |      |          | 0.00        | 0.00000      | - -             |
| 3 |      |          | 0.00        | 0.00000      | - -             |

|    |   |        |          |     |     |
|----|---|--------|----------|-----|-----|
| 4  |   | 0.00   | 0.00000  | -   | -   |
| 5  |   | 0.00   | 0.00000  | -   | -   |
| 6  |   | 0.00   | 0.00000  | -   | -   |
| 7  |   | 0.00   | 0.00000  | -   | -   |
| 8  | a | 19.11  | 0.00795  | YES | YES |
| 9  | a | 25.55  | 0.42080  | YES | YES |
| 10 | a | 36.80  | 0.24743  | YES | YES |
| 11 | a | 50.02  | 0.01194  | YES | YES |
| 12 | a | 62.78  | 0.35860  | YES | YES |
| 13 | a | 74.19  | 1.54238  | YES | YES |
| 14 | a | 88.21  | 0.46670  | YES | YES |
| 15 | a | 90.75  | 0.18401  | YES | YES |
| 16 | a | 99.41  | 1.03121  | YES | YES |
| 17 | a | 106.93 | 0.10587  | YES | YES |
| 18 | a | 115.06 | 0.57837  | YES | YES |
| 19 | a | 124.51 | 0.24267  | YES | YES |
| 20 | a | 130.62 | 0.61017  | YES | YES |
| 21 | a | 142.11 | 0.86214  | YES | YES |
| 22 | a | 157.29 | 0.55479  | YES | YES |
| 23 | a | 184.92 | 0.19479  | YES | YES |
| 24 | a | 196.86 | 1.19340  | YES | YES |
| 25 | a | 215.56 | 1.28885  | YES | YES |
| 26 | a | 219.99 | 0.16940  | YES | YES |
| 27 | a | 237.14 | 1.67363  | YES | YES |
| 28 | a | 259.45 | 0.14314  | YES | YES |
| 29 | a | 289.72 | 0.20098  | YES | YES |
| 30 | a | 304.37 | 0.88957  | YES | YES |
| 31 | a | 332.98 | 0.97419  | YES | YES |
| 32 | a | 351.21 | 9.54902  | YES | YES |
| 33 | a | 385.30 | 2.59182  | YES | YES |
| 34 | a | 403.53 | 0.11870  | YES | YES |
| 35 | a | 406.94 | 0.93506  | YES | YES |
| 36 | a | 428.32 | 0.72794  | YES | YES |
| 37 | a | 447.17 | 1.62589  | YES | YES |
| 38 | a | 452.76 | 2.13332  | YES | YES |
| 39 | a | 465.85 | 10.10407 | YES | YES |
| 40 | a | 478.61 | 2.11244  | YES | YES |
| 41 | a | 492.64 | 1.85906  | YES | YES |
| 42 | a | 495.93 | 11.69786 | YES | YES |
| 43 | a | 510.21 | 5.47025  | YES | YES |
| 44 | a | 522.54 | 0.68273  | YES | YES |
| 45 | a | 538.58 | 11.69373 | YES | YES |
| 46 | a | 549.24 | 15.95716 | YES | YES |
| 47 | a | 551.00 | 3.74202  | YES | YES |
| 48 | a | 581.07 | 5.63391  | YES | YES |
| 49 | a | 584.20 | 14.70772 | YES | YES |
| 50 | a | 609.52 | 14.07838 | YES | YES |



**TS<sub>23fa'</sub>**

SCF Energy (au) BP86/SV(P) -2391.943845351  
SCF Energy (au) PBE0/def2-TZVPP -2391.497946159  
SCF Energy (au) PBE0/def2-TZVPP -2391.5061895680 (Toluene Correction)  
Zero Point Energy (au) 0.3205041  
Chemical Potential (kJ mol<sup>-1</sup>) 691.29  
Dispersion Correction (au) PBE0/def2-TZVPP -0.06768189

xyz coordinates

45

|    |            |            |            |
|----|------------|------------|------------|
| Mn | 1.3110392  | 1.2919826  | 0.4372025  |
| C  | 1.4509833  | 1.6980167  | 2.1987554  |
| C  | 3.0228283  | 0.8213585  | 0.3786671  |
| C  | 1.7953893  | 2.9380234  | -0.1248740 |
| O  | 2.2046709  | 3.9514035  | -0.5338050 |
| O  | 4.1482855  | 0.5024836  | 0.3461756  |
| O  | 1.5310264  | 1.9758415  | 3.3279080  |
| C  | -1.5523798 | 0.5457394  | 1.0418146  |
| C  | -1.4986120 | 2.7521652  | 0.2485363  |
| C  | -2.9024106 | 2.8677863  | 0.3315387  |
| C  | -3.6342364 | 1.7570910  | 0.7744980  |
| C  | -2.9629776 | 0.5856278  | 1.1280883  |
| C  | -0.7457941 | -0.6197127 | 1.4129148  |
| C  | 0.6175561  | -0.6239367 | 0.9817123  |
| C  | 1.4303899  | -1.7145122 | 1.3919974  |
| C  | 0.9321047  | -2.7317726 | 2.2105416  |
| C  | -0.4190106 | -2.7209434 | 2.6216926  |
| C  | -1.2508336 | -1.6730210 | 2.2171497  |
| O  | -0.7002393 | 3.7487217  | -0.1755946 |
| H  | -3.4111534 | 3.8006983  | 0.0535798  |
| H  | -4.7332901 | 1.8131157  | 0.8378185  |
| H  | -3.5200531 | -0.3020652 | 1.4585336  |
| H  | 2.4804194  | -1.7603028 | 1.0605214  |
| H  | 1.6004942  | -3.5474605 | 2.5338769  |
| H  | -0.8132982 | -3.5238275 | 3.2654803  |
| H  | -2.2957236 | -1.6488616 | 2.5674539  |
| N  | -0.8365671 | 1.6221262  | 0.5948643  |
| H  | 0.7824923  | 1.3877611  | -2.4572689 |
| C  | 0.8270174  | 0.8827240  | -1.4868665 |
| C  | 0.7844700  | -0.3219684 | -1.0065775 |
| C  | 0.9209701  | -1.6842854 | -1.5522209 |
| C  | 1.1695360  | -4.2139431 | -2.8018412 |
| C  | 2.1030016  | -3.1991099 | -3.0733444 |
| C  | 1.9792576  | -1.9436023 | -2.4576369 |
| C  | -0.0051991 | -2.7178798 | -1.2778888 |
| C  | 0.1145770  | -3.9666638 | -1.9047448 |
| H  | 1.2648857  | -5.1996778 | -3.2869415 |
| H  | 2.9370347  | -3.3850051 | -3.7704585 |
| H  | 2.7109546  | -1.1462934 | -2.6638590 |
| H  | -0.8306913 | -2.5304744 | -0.5734895 |
| H  | -0.6238435 | -4.7568831 | -1.6894224 |
| C  | -1.2549939 | 4.9970395  | -0.5660557 |
| H  | -1.9479386 | 4.8831263  | -1.4315429 |
| H  | -0.3905350 | 5.6213350  | -0.8662557 |
| H  | -1.7896031 | 5.4880350  | 0.2793667  |

\$vibrational spectrum

| # | mode | symmetry | wave number           | IR intensity | selection rules |
|---|------|----------|-----------------------|--------------|-----------------|
| # |      |          | cm <sup>**</sup> (-1) | km/mol       | IR RAMAN        |
|   | 1    | a        | -281.82               | 0.00000      | YES YES         |
|   | 2    |          | 0.00                  | 0.00000      | - -             |
|   | 3    |          | 0.00                  | 0.00000      | - -             |

|    |   |        |          |     |     |
|----|---|--------|----------|-----|-----|
| 4  |   | 0.00   | 0.00000  | -   | -   |
| 5  |   | 0.00   | 0.00000  | -   | -   |
| 6  |   | 0.00   | 0.00000  | -   | -   |
| 7  |   | 0.00   | 0.00000  | -   | -   |
| 8  | a | 21.96  | 0.54731  | YES | YES |
| 9  | a | 27.17  | 0.31688  | YES | YES |
| 10 | a | 39.40  | 0.07178  | YES | YES |
| 11 | a | 45.13  | 0.01735  | YES | YES |
| 12 | a | 59.30  | 0.80359  | YES | YES |
| 13 | a | 73.87  | 1.42854  | YES | YES |
| 14 | a | 81.25  | 0.11047  | YES | YES |
| 15 | a | 89.84  | 0.12936  | YES | YES |
| 16 | a | 91.63  | 0.10392  | YES | YES |
| 17 | a | 109.10 | 0.05579  | YES | YES |
| 18 | a | 111.04 | 1.52700  | YES | YES |
| 19 | a | 129.12 | 0.58316  | YES | YES |
| 20 | a | 130.00 | 0.22055  | YES | YES |
| 21 | a | 142.74 | 0.77459  | YES | YES |
| 22 | a | 160.87 | 1.01154  | YES | YES |
| 23 | a | 184.29 | 0.59976  | YES | YES |
| 24 | a | 185.71 | 2.74327  | YES | YES |
| 25 | a | 209.39 | 0.21746  | YES | YES |
| 26 | a | 219.24 | 3.52486  | YES | YES |
| 27 | a | 226.92 | 2.15658  | YES | YES |
| 28 | a | 261.16 | 0.23288  | YES | YES |
| 29 | a | 284.51 | 0.53013  | YES | YES |
| 30 | a | 300.92 | 1.42087  | YES | YES |
| 31 | a | 315.13 | 2.22167  | YES | YES |
| 32 | a | 333.70 | 0.64837  | YES | YES |
| 33 | a | 402.41 | 0.38858  | YES | YES |
| 34 | a | 403.00 | 0.12920  | YES | YES |
| 35 | a | 410.69 | 4.78803  | YES | YES |
| 36 | a | 443.69 | 3.35847  | YES | YES |
| 37 | a | 457.29 | 0.26555  | YES | YES |
| 38 | a | 467.58 | 0.25933  | YES | YES |
| 39 | a | 475.36 | 3.06914  | YES | YES |
| 40 | a | 479.63 | 3.18434  | YES | YES |
| 41 | a | 502.35 | 7.87649  | YES | YES |
| 42 | a | 509.01 | 11.22374 | YES | YES |
| 43 | a | 510.08 | 10.04585 | YES | YES |
| 44 | a | 526.74 | 6.49210  | YES | YES |
| 45 | a | 541.34 | 9.55862  | YES | YES |
| 46 | a | 548.14 | 6.24154  | YES | YES |
| 47 | a | 558.45 | 15.13916 | YES | YES |
| 48 | a | 564.90 | 6.13221  | YES | YES |
| 49 | a | 581.38 | 3.49303  | YES | YES |
| 50 | a | 606.71 | 40.94505 | YES | YES |

**TS<sub>23ga</sub>**

|                                            |                                       |
|--------------------------------------------|---------------------------------------|
| SCF Energy (au) BP86/SV(P)                 | -2508.390483009                       |
| SCF Energy (au) PBE0/def2-TZVPP            | -2507.907823752                       |
| SCF Energy (au) PBE0/def2-TZVPP            | -2507.9156889379 (Toluene Correction) |
| Zero Point Energy (au)                     | 0.3677427                             |
| Chemical Potential (kJ mol <sup>-1</sup> ) | 805.67                                |
| Dispersion Correction (au) PBE0/def2-TZVPP | -0.08080308                           |

xyz coordinates

51

|    |            |            |            |
|----|------------|------------|------------|
| Mn | 1.5248441  | -0.5845365 | 0.6397492  |
| C  | 1.9479276  | -0.1680022 | 2.3451840  |
| C  | 3.1531787  | -1.2378222 | 0.3611675  |
| C  | 2.1434209  | 0.9801826  | -0.0458451 |
| O  | 2.6918521  | 1.9009823  | -0.5073779 |
| O  | 4.2221227  | -1.6797369 | 0.1922384  |
| O  | 2.2034064  | 0.0904312  | 3.4519353  |
| C  | -1.3262728 | -1.0784282 | 1.4637251  |
| C  | -1.1652883 | 1.1729122  | 0.7906054  |
| C  | -2.5693532 | 1.2931026  | 0.7780946  |
| C  | -3.3670493 | 0.1875560  | 1.1054350  |
| C  | -2.7381636 | -1.0002992 | 1.4764198  |
| C  | -0.5901441 | -2.2833859 | 1.8490622  |
| C  | 0.7694752  | -2.3633513 | 1.4202424  |
| C  | 1.5213038  | -3.4987701 | 1.8290059  |
| C  | 0.9525439  | -4.5042281 | 2.6153884  |
| C  | -0.4005685 | -4.4235477 | 3.0150732  |
| C  | -1.1636811 | -3.3192696 | 2.6284128  |
| C  | -0.3684453 | 2.4183943  | 0.5898400  |
| H  | -3.0168067 | 2.2711242  | 0.5453896  |
| H  | -4.4666693 | 0.2630063  | 1.0922184  |
| H  | -3.3295190 | -1.8843629 | 1.7555811  |
| H  | 2.5741119  | -3.5971104 | 1.5150369  |
| H  | 1.5690844  | -5.3632896 | 2.9303901  |
| H  | -0.8469301 | -5.2157813 | 3.6375045  |
| H  | -2.2094528 | -3.2406564 | 2.9683437  |
| N  | -0.5553920 | -0.0151934 | 1.0669763  |
| C  | 0.1552864  | -0.4653066 | -2.4658343 |
| C  | 0.8115630  | 0.6114667  | -3.1182067 |
| C  | 0.3520392  | 1.0840650  | -4.3563685 |
| C  | -0.7830842 | 0.5178294  | -4.9641111 |
| C  | -1.4555771 | -0.5377193 | -4.3206713 |
| C  | -0.9942453 | -1.0266136 | -3.0914358 |
| H  | 1.6965534  | 1.0694607  | -2.6547579 |
| H  | 0.8886911  | 1.9104129  | -4.8516946 |
| H  | -1.1442849 | 0.8987999  | -5.9335844 |
| H  | -2.3490344 | -0.9888064 | -4.7841610 |
| H  | -1.5217427 | -1.8530576 | -2.5889030 |
| C  | 0.6129898  | -1.0354979 | -1.2186079 |
| C  | 0.7942461  | -2.1456615 | -0.5795400 |
| H  | 0.9486033  | -3.2104797 | -0.7768708 |
| C  | 0.9675526  | 4.8921174  | 0.3197217  |
| C  | 1.0864307  | 4.1530671  | 1.5096814  |
| C  | 0.4248956  | 2.9235896  | 1.6455242  |
| C  | -0.4989074 | 3.1762558  | -0.5944436 |
| C  | 0.1746010  | 4.4006849  | -0.7311774 |
| H  | 1.4944440  | 5.8545831  | 0.2121793  |
| H  | 1.7004501  | 4.5366872  | 2.3410568  |
| H  | 0.5127752  | 2.3515817  | 2.5829314  |
| H  | -1.1148258 | 2.7888184  | -1.4221905 |
| H  | 0.0810448  | 4.9738029  | -1.6683325 |

\$vibrational spectrum

| #  | mode | symmetry | wave number<br>cm**(-1) | IR intensity<br>km/mol | selection rules |       |
|----|------|----------|-------------------------|------------------------|-----------------|-------|
| #  |      |          |                         |                        | IR              | RAMAN |
| 1  |      | a        | -220.39                 | 0.00000                | YES             | YES   |
| 2  |      |          | 0.00                    | 0.00000                | -               | -     |
| 3  |      |          | 0.00                    | 0.00000                | -               | -     |
| 4  |      |          | 0.00                    | 0.00000                | -               | -     |
| 5  |      |          | 0.00                    | 0.00000                | -               | -     |
| 6  |      |          | 0.00                    | 0.00000                | -               | -     |
| 7  |      |          | 0.00                    | 0.00000                | -               | -     |
| 8  |      | a        | 7.18                    | 0.04481                | YES             | YES   |
| 9  |      | a        | 25.98                   | 0.14963                | YES             | YES   |
| 10 |      | a        | 28.35                   | 0.07413                | YES             | YES   |
| 11 |      | a        | 46.66                   | 0.05710                | YES             | YES   |
| 12 |      | a        | 59.46                   | 0.24527                | YES             | YES   |
| 13 |      | a        | 68.02                   | 0.05833                | YES             | YES   |
| 14 |      | a        | 74.15                   | 0.04441                | YES             | YES   |
| 15 |      | a        | 75.96                   | 0.56208                | YES             | YES   |
| 16 |      | a        | 89.54                   | 0.52008                | YES             | YES   |
| 17 |      | a        | 93.41                   | 0.21133                | YES             | YES   |
| 18 |      | a        | 104.63                  | 0.29995                | YES             | YES   |
| 19 |      | a        | 112.39                  | 0.18400                | YES             | YES   |
| 20 |      | a        | 119.55                  | 0.10028                | YES             | YES   |
| 21 |      | a        | 126.31                  | 0.36676                | YES             | YES   |
| 22 |      | a        | 133.97                  | 0.32997                | YES             | YES   |
| 23 |      | a        | 156.06                  | 0.27131                | YES             | YES   |
| 24 |      | a        | 162.45                  | 0.56834                | YES             | YES   |
| 25 |      | a        | 186.04                  | 0.40033                | YES             | YES   |
| 26 |      | a        | 205.73                  | 0.28924                | YES             | YES   |
| 27 |      | a        | 217.74                  | 0.64486                | YES             | YES   |
| 28 |      | a        | 233.91                  | 0.23953                | YES             | YES   |
| 29 |      | a        | 243.74                  | 1.42955                | YES             | YES   |
| 30 |      | a        | 292.38                  | 0.46312                | YES             | YES   |
| 31 |      | a        | 311.96                  | 0.57499                | YES             | YES   |
| 32 |      | a        | 334.06                  | 0.79096                | YES             | YES   |
| 33 |      | a        | 352.03                  | 9.28848                | YES             | YES   |
| 34 |      | a        | 368.04                  | 0.39060                | YES             | YES   |
| 35 |      | a        | 390.04                  | 4.82528                | YES             | YES   |
| 36 |      | a        | 401.29                  | 0.38297                | YES             | YES   |
| 37 |      | a        | 402.85                  | 0.11789                | YES             | YES   |
| 38 |      | a        | 423.04                  | 1.79015                | YES             | YES   |
| 39 |      | a        | 442.50                  | 0.64033                | YES             | YES   |
| 40 |      | a        | 449.25                  | 2.87375                | YES             | YES   |
| 41 |      | a        | 464.05                  | 9.91506                | YES             | YES   |
| 42 |      | a        | 470.92                  | 3.87025                | YES             | YES   |
| 43 |      | a        | 485.37                  | 1.17087                | YES             | YES   |
| 44 |      | a        | 496.16                  | 4.18584                | YES             | YES   |
| 45 |      | a        | 496.70                  | 7.06281                | YES             | YES   |
| 46 |      | a        | 509.12                  | 5.45970                | YES             | YES   |
| 47 |      | a        | 522.80                  | 0.52314                | YES             | YES   |
| 48 |      | a        | 544.46                  | 10.99192               | YES             | YES   |
| 49 |      | a        | 548.38                  | 10.35088               | YES             | YES   |
| 50 |      | a        | 553.61                  | 7.49606                | YES             | YES   |

**TS<sub>23ga</sub>'**

|                                            |                                       |
|--------------------------------------------|---------------------------------------|
| SCF Energy (au) BP86/SV(P)                 | -2508.381424342                       |
| SCF Energy (au) PBE0/def2-TZVPP            | -2507.899292682                       |
| SCF Energy (au) PBE0/def2-TZVPP            | -2507.9076218786 (Toluene Correction) |
| Zero Point Energy (au)                     | 0.3672553                             |
| Chemical Potential (kJ mol <sup>-1</sup> ) | 806.64                                |
| Dispersion Correction (au) PBE0/def2-TZVPP | -0.08140660                           |

xyz coordinates

51

|    |            |            |            |
|----|------------|------------|------------|
| Mn | 1.2410302  | 0.5333857  | 0.2961025  |
| C  | 1.5263352  | 1.0929493  | 1.9927023  |
| C  | 2.9071938  | -0.0668038 | 0.1951247  |
| C  | 1.8221134  | 2.0394922  | -0.5207088 |
| O  | 2.3096189  | 2.9125814  | -1.1210368 |
| O  | 4.0048967  | -0.4683008 | 0.1367038  |
| O  | 1.6945615  | 1.4668466  | 3.0848500  |
| C  | -1.6597261 | -0.0149824 | 0.9417047  |
| C  | -1.5364748 | 2.1990646  | 0.1567478  |
| C  | -2.9411974 | 2.2625908  | 0.0498340  |
| C  | -3.7179655 | 1.1449970  | 0.3851796  |
| C  | -3.0711123 | 0.0031825  | 0.8574349  |
| C  | -0.9090923 | -1.1703598 | 1.4404657  |
| C  | 0.4594018  | -1.2690511 | 1.0439718  |
| C  | 1.2150706  | -2.3528122 | 1.5680757  |
| C  | 0.6562456  | -3.2665642 | 2.4657516  |
| C  | -0.7007262 | -3.1607172 | 2.8435114  |
| C  | -1.4788625 | -2.1225976 | 2.3227578  |
| C  | -0.7715030 | 3.4558025  | -0.0874276 |
| H  | -3.4081654 | 3.2081733  | -0.2644633 |
| H  | -4.8162981 | 1.1754567  | 0.2970408  |
| H  | -3.6447395 | -0.8918064 | 1.1399669  |
| H  | 2.2676031  | -2.4767398 | 1.2651584  |
| H  | 1.2811689  | -4.0761009 | 2.8790807  |
| H  | -1.1414055 | -3.8821409 | 3.5506334  |
| H  | -2.5291042 | -2.0190188 | 2.6420475  |
| N  | -0.9031486 | 1.0552181  | 0.5435537  |
| H  | 0.4499847  | 0.4216045  | -2.5439982 |
| C  | 0.5607354  | -0.0039046 | -1.5418071 |
| C  | 0.5742943  | -1.1626540 | -0.9586258 |
| C  | 0.7256616  | -2.5658496 | -1.3849620 |
| C  | 1.0037271  | -5.1939512 | -2.3999772 |
| C  | 1.9155938  | -4.1931897 | -2.7769453 |
| C  | 1.7767054  | -2.8884252 | -2.2778509 |
| C  | -0.1787191 | -3.5841268 | -1.0032094 |
| C  | -0.0447128 | -4.8831180 | -1.5151326 |
| H  | 1.1107196  | -6.2183806 | -2.7938696 |
| H  | 2.7439438  | -4.4283081 | -3.4657565 |
| H  | 2.4910807  | -2.1013343 | -2.5668104 |
| H  | -0.9984457 | -3.3465788 | -0.3070807 |
| H  | -0.7656718 | -5.6628181 | -1.2180546 |
| C  | 0.5151894  | 5.9401442  | -0.4778100 |
| C  | 0.6249282  | 5.2747137  | 0.7554304  |
| C  | -0.0111497 | 4.0399951  | 0.9510863  |
| C  | -0.8937585 | 4.1414036  | -1.3158616 |
| C  | -0.2447296 | 5.3703487  | -1.5131783 |
| H  | 1.0235453  | 6.9062034  | -0.6319847 |
| H  | 1.2129245  | 5.7201377  | 1.5746824  |
| H  | 0.0709041  | 3.5264374  | 1.9220227  |
| H  | -1.4872165 | 3.6944123  | -2.1308931 |
| H  | -0.3312525 | 5.8854934  | -2.4841767 |

\$vibrational spectrum

| #  | mode | symmetry | wave number<br>cm**(-1) | IR intensity<br>km/mol | selection rules |       |
|----|------|----------|-------------------------|------------------------|-----------------|-------|
| #  |      |          |                         |                        | IR              | RAMAN |
| 1  |      | a        | -284.04                 | 0.00000                | YES             | YES   |
| 2  |      |          | 0.00                    | 0.00000                | -               | -     |
| 3  |      |          | 0.00                    | 0.00000                | -               | -     |
| 4  |      |          | 0.00                    | 0.00000                | -               | -     |
| 5  |      |          | 0.00                    | 0.00000                | -               | -     |
| 6  |      |          | 0.00                    | 0.00000                | -               | -     |
| 7  |      |          | 0.00                    | 0.00000                | -               | -     |
| 8  |      | a        | 21.83                   | 0.24742                | YES             | YES   |
| 9  |      | a        | 26.53                   | 0.04054                | YES             | YES   |
| 10 |      | a        | 27.55                   | 0.22997                | YES             | YES   |
| 11 |      | a        | 55.52                   | 0.15441                | YES             | YES   |
| 12 |      | a        | 58.54                   | 0.19895                | YES             | YES   |
| 13 |      | a        | 61.78                   | 0.23479                | YES             | YES   |
| 14 |      | a        | 71.79                   | 0.06660                | YES             | YES   |
| 15 |      | a        | 76.28                   | 0.41529                | YES             | YES   |
| 16 |      | a        | 83.91                   | 0.31739                | YES             | YES   |
| 17 |      | a        | 95.67                   | 0.03798                | YES             | YES   |
| 18 |      | a        | 99.00                   | 0.00329                | YES             | YES   |
| 19 |      | a        | 107.45                  | 0.22463                | YES             | YES   |
| 20 |      | a        | 121.83                  | 0.36120                | YES             | YES   |
| 21 |      | a        | 126.36                  | 0.65725                | YES             | YES   |
| 22 |      | a        | 137.69                  | 0.31483                | YES             | YES   |
| 23 |      | a        | 150.00                  | 0.32541                | YES             | YES   |
| 24 |      | a        | 162.20                  | 1.30034                | YES             | YES   |
| 25 |      | a        | 188.41                  | 2.47324                | YES             | YES   |
| 26 |      | a        | 206.75                  | 0.28675                | YES             | YES   |
| 27 |      | a        | 213.47                  | 0.30054                | YES             | YES   |
| 28 |      | a        | 219.86                  | 2.90087                | YES             | YES   |
| 29 |      | a        | 243.29                  | 2.20485                | YES             | YES   |
| 30 |      | a        | 286.50                  | 0.19870                | YES             | YES   |
| 31 |      | a        | 310.92                  | 0.22004                | YES             | YES   |
| 32 |      | a        | 315.82                  | 3.21257                | YES             | YES   |
| 33 |      | a        | 336.36                  | 0.22768                | YES             | YES   |
| 34 |      | a        | 363.76                  | 0.87637                | YES             | YES   |
| 35 |      | a        | 400.50                  | 0.19138                | YES             | YES   |
| 36 |      | a        | 403.33                  | 0.02312                | YES             | YES   |
| 37 |      | a        | 410.28                  | 4.24302                | YES             | YES   |
| 38 |      | a        | 428.24                  | 3.94233                | YES             | YES   |
| 39 |      | a        | 452.97                  | 0.04614                | YES             | YES   |
| 40 |      | a        | 463.34                  | 1.26011                | YES             | YES   |
| 41 |      | a        | 471.28                  | 2.93625                | YES             | YES   |
| 42 |      | a        | 476.39                  | 2.12371                | YES             | YES   |
| 43 |      | a        | 491.14                  | 1.06595                | YES             | YES   |
| 44 |      | a        | 499.32                  | 3.23268                | YES             | YES   |
| 45 |      | a        | 509.11                  | 20.73100               | YES             | YES   |
| 46 |      | a        | 511.47                  | 2.04412                | YES             | YES   |
| 47 |      | a        | 527.22                  | 1.86051                | YES             | YES   |
| 48 |      | a        | 542.20                  | 12.79466               | YES             | YES   |
| 49 |      | a        | 553.78                  | 5.71313                | YES             | YES   |
| 50 |      | a        | 559.95                  | 14.88453               | YES             | YES   |

**TS<sub>23ha</sub>**

SCF Energy (au) BP86/SV(P) -2354.862307833  
SCF Energy (au) PBE0/def2-TZVPP -2354.406354751  
SCF Energy (au) PBE0/def2-TZVPP -2354.4142715193 (Toluene Correction)  
Zero Point Energy (au) 0.3226651  
Chemical Potential (kJ mol<sup>-1</sup>) 696.08  
Dispersion Correction (au) PBE0/def2-TZVPP -0.06451629

xyz coordinates

45

|    |            |            |            |
|----|------------|------------|------------|
| Mn | 2.2084975  | 0.5250623  | 0.5478324  |
| C  | 2.6176997  | 0.7441853  | 2.2909833  |
| C  | 3.9129016  | 0.0878398  | 0.1836519  |
| C  | 2.5072647  | 2.2676112  | 0.1533830  |
| O  | 2.7042883  | 3.3973215  | -0.0618477 |
| O  | 5.0195021  | -0.2048262 | -0.0461420 |
| O  | 2.8692686  | 0.8708948  | 3.4207629  |
| C  | -0.5551355 | -0.0946769 | 1.2974896  |
| C  | -2.0218377 | 0.1023037  | 1.4525877  |
| C  | 0.1473763  | -1.3403631 | 1.5748185  |
| C  | 1.5219795  | -1.3471266 | 1.1580807  |
| C  | 2.2933222  | -2.4938345 | 1.4860373  |
| C  | 1.7320956  | -3.5737157 | 2.1751747  |
| C  | 0.3709319  | -3.5602620 | 2.5605212  |
| C  | -0.4165103 | -2.4465547 | 2.2606540  |
| H  | 3.3550933  | -2.5382253 | 1.1887155  |
| H  | 2.3632348  | -4.4427922 | 2.4280768  |
| H  | -0.0603429 | -4.4147024 | 3.1066682  |
| H  | -1.4689279 | -2.4092071 | 2.5857970  |
| N  | 0.2270115  | 0.8730877  | 0.8742984  |
| C  | 0.9202487  | 0.8497547  | -2.5944228 |
| C  | 1.4599919  | 2.0800371  | -3.0524654 |
| C  | 0.9950442  | 2.6676223  | -4.2376942 |
| C  | -0.0284697 | 2.0583820  | -4.9852224 |
| C  | -0.5822600 | 0.8444312  | -4.5379431 |
| C  | -0.1163384 | 0.2449687  | -3.3610110 |
| H  | 2.2572838  | 2.5714496  | -2.4764361 |
| H  | 1.4363998  | 3.6186356  | -4.5793264 |
| H  | -0.3965910 | 2.5289268  | -5.9117454 |
| H  | -1.3869890 | 0.3575539  | -5.1140262 |
| H  | -0.5514575 | -0.7048071 | -3.0108143 |
| C  | 1.3904782  | 0.1728235  | -1.4093728 |
| C  | 1.6563040  | -0.9615126 | -0.8514462 |
| H  | 1.9301743  | -1.9875303 | -1.1118527 |
| C  | -4.8044947 | 0.5537602  | 1.6782051  |
| C  | -4.3265595 | -0.6013673 | 1.0345916  |
| C  | -2.9461264 | -0.8304895 | 0.9262954  |
| C  | -2.5138801 | 1.2629604  | 2.0949284  |
| C  | -3.8947102 | 1.4844429  | 2.2095130  |
| H  | -5.8894386 | 0.7282725  | 1.7672252  |
| H  | -5.0359508 | -1.3295173 | 0.6079751  |
| H  | -2.5756396 | -1.7276806 | 0.4049310  |
| H  | -1.8032385 | 1.9844021  | 2.5317119  |
| H  | -4.2629510 | 2.3874861  | 2.7235363  |
| H  | -0.2585430 | 1.7449751  | 0.6173225  |

\$vibrational spectrum

| # | mode | symmetry | wave number | IR intensity | selection rules |
|---|------|----------|-------------|--------------|-----------------|
| # |      |          | cm**(-1)    | km/mol       | IR RAMAN        |
|   | 1    | a        | -211.06     | 0.00000      | YES YES         |
|   | 2    |          | 0.00        | 0.00000      | - -             |
|   | 3    |          | 0.00        | 0.00000      | - -             |

|    |   |        |          |     |     |
|----|---|--------|----------|-----|-----|
| 4  |   | 0.00   | 0.00000  | -   | -   |
| 5  |   | 0.00   | 0.00000  | -   | -   |
| 6  |   | 0.00   | 0.00000  | -   | -   |
| 7  |   | 0.00   | 0.00000  | -   | -   |
| 8  | a | 18.67  | 0.09950  | YES | YES |
| 9  | a | 21.60  | 0.02891  | YES | YES |
| 10 | a | 38.38  | 0.00779  | YES | YES |
| 11 | a | 48.05  | 0.09372  | YES | YES |
| 12 | a | 51.86  | 0.11616  | YES | YES |
| 13 | a | 69.55  | 0.22643  | YES | YES |
| 14 | a | 73.33  | 0.08989  | YES | YES |
| 15 | a | 80.49  | 0.12999  | YES | YES |
| 16 | a | 88.89  | 0.07702  | YES | YES |
| 17 | a | 94.68  | 0.23259  | YES | YES |
| 18 | a | 103.22 | 0.02377  | YES | YES |
| 19 | a | 110.35 | 0.25271  | YES | YES |
| 20 | a | 134.35 | 0.18439  | YES | YES |
| 21 | a | 143.04 | 0.44549  | YES | YES |
| 22 | a | 176.35 | 0.76100  | YES | YES |
| 23 | a | 195.95 | 0.47683  | YES | YES |
| 24 | a | 204.67 | 0.63859  | YES | YES |
| 25 | a | 212.39 | 0.45590  | YES | YES |
| 26 | a | 238.72 | 0.78590  | YES | YES |
| 27 | a | 269.37 | 1.77691  | YES | YES |
| 28 | a | 304.64 | 0.65671  | YES | YES |
| 29 | a | 340.16 | 8.47923  | YES | YES |
| 30 | a | 358.93 | 0.43972  | YES | YES |
| 31 | a | 395.36 | 1.89545  | YES | YES |
| 32 | a | 402.38 | 0.02315  | YES | YES |
| 33 | a | 404.64 | 0.38999  | YES | YES |
| 34 | a | 420.53 | 1.91042  | YES | YES |
| 35 | a | 436.65 | 0.58360  | YES | YES |
| 36 | a | 447.96 | 4.00709  | YES | YES |
| 37 | a | 461.40 | 20.24491 | YES | YES |
| 38 | a | 465.05 | 2.25747  | YES | YES |
| 39 | a | 485.47 | 0.85113  | YES | YES |
| 40 | a | 492.96 | 2.86485  | YES | YES |
| 41 | a | 497.08 | 3.33844  | YES | YES |
| 42 | a | 504.77 | 8.24943  | YES | YES |
| 43 | a | 521.80 | 0.45494  | YES | YES |
| 44 | a | 540.22 | 19.26739 | YES | YES |
| 45 | a | 544.86 | 15.56428 | YES | YES |
| 46 | a | 564.68 | 28.71926 | YES | YES |
| 47 | a | 590.89 | 1.48234  | YES | YES |
| 48 | a | 609.57 | 1.75365  | YES | YES |
| 49 | a | 611.76 | 5.86176  | YES | YES |
| 50 | a | 618.68 | 13.41133 | YES | YES |



**TS<sub>23ia</sub>**

SCF Energy (au) BP86/SV(P) -2183.113967934  
 SCF Energy (au) PBE0/def2-TZVPP -2182.694332982  
 SCF Energy (au) PBE0/def2-TZVPP -2182.7012637601 (Toluene Correction)  
 Zero Point Energy (au) 0.2578498  
 Chemical Potential (kJ mol<sup>-1</sup>) 537.65  
 Dispersion Correction (au) PBE0/def2-TZVPP -0.05000930

xyz coordinates  
 37

|    |            |            |            |
|----|------------|------------|------------|
| Mn | 1.3012750  | 0.6735212  | 0.8636467  |
| C  | 1.6923990  | 0.9350102  | 2.6106761  |
| C  | 3.0056460  | 0.2982574  | 0.5195438  |
| C  | 1.5195873  | 2.4381721  | 0.4701240  |
| O  | 1.6680679  | 3.5695831  | 0.2467560  |
| O  | 4.1188443  | 0.0253376  | 0.2925176  |
| O  | 1.9402074  | 1.0881191  | 3.7374012  |
| C  | -1.4133247 | 0.0725285  | 1.6759428  |
| C  | -2.8893810 | 0.2622864  | 1.9251222  |
| C  | -0.7120733 | -1.1720529 | 1.9402837  |
| C  | 0.6484269  | -1.1933217 | 1.4760537  |
| C  | 1.4170669  | -2.3495710 | 1.7900079  |
| C  | 0.8606475  | -3.4172984 | 2.4976908  |
| C  | -0.4970965 | -3.3998829 | 2.9059424  |
| C  | -1.2792418 | -2.2813597 | 2.6211696  |
| H  | 2.4683728  | -2.4084477 | 1.4609439  |
| H  | 1.4898509  | -4.2905435 | 2.7409042  |
| H  | -0.9242473 | -4.2576205 | 3.4497033  |
| H  | -2.3326827 | -2.2471590 | 2.9453367  |
| O  | -0.7429383 | 1.0326985  | 1.2089872  |
| C  | 0.1325468  | 0.9718078  | -2.2911245 |
| C  | 0.7714301  | 2.1345748  | -2.7930459 |
| C  | 0.3824316  | 2.6896191  | -4.0202216 |
| C  | -0.6628773 | 2.1152407  | -4.7650935 |
| C  | -1.3143103 | 0.9685711  | -4.2745778 |
| C  | -0.9219310 | 0.3997316  | -3.0562753 |
| H  | 1.5860925  | 2.5985052  | -2.2181170 |
| H  | 0.8988533  | 3.5882855  | -4.3963692 |
| H  | -0.9726876 | 2.5619450  | -5.7242020 |
| H  | -2.1370795 | 0.5107462  | -4.8488892 |
| H  | -1.4327901 | -0.4979350 | -2.6718159 |
| C  | 0.5245875  | 0.3310298  | -1.0565555 |
| C  | 0.7064571  | -0.8183133 | -0.4815302 |
| H  | 0.9010254  | -1.8573590 | -0.7651214 |
| H  | -3.1924575 | 1.2771447  | 1.5999085  |
| H  | -3.1200868 | 0.1456830  | 3.0077219  |
| H  | -3.4886102 | -0.4975339 | 1.3765547  |

| # | mode | symmetry | wave number | IR intensity | selection rules |       |
|---|------|----------|-------------|--------------|-----------------|-------|
| # |      |          | cm** (-1)   | km/mol       | IR              | RAMAN |
|   | 1    | a        | -228.38     | 0.00000      | YES             | YES   |
|   | 2    |          | 0.00        | 0.00000      | -               | -     |
|   | 3    |          | 0.00        | 0.00000      | -               | -     |
|   | 4    |          | 0.00        | 0.00000      | -               | -     |
|   | 5    |          | 0.00        | 0.00000      | -               | -     |
|   | 6    |          | 0.00        | 0.00000      | -               | -     |
|   | 7    |          | 0.00        | 0.00000      | -               | -     |
|   | 8    | a        | 18.98       | 0.12008      | YES             | YES   |
|   | 9    | a        | 28.24       | 0.16870      | YES             | YES   |
|   | 10   | a        | 56.30       | 0.07960      | YES             | YES   |

|    |   |        |          |     |     |
|----|---|--------|----------|-----|-----|
| 11 | a | 57.56  | 0.36639  | YES | YES |
| 12 | a | 73.76  | 0.43554  | YES | YES |
| 13 | a | 77.76  | 0.29842  | YES | YES |
| 14 | a | 90.84  | 0.23664  | YES | YES |
| 15 | a | 98.00  | 0.44156  | YES | YES |
| 16 | a | 103.22 | 0.33827  | YES | YES |
| 17 | a | 109.70 | 0.29581  | YES | YES |
| 18 | a | 123.22 | 0.04442  | YES | YES |
| 19 | a | 139.00 | 0.13164  | YES | YES |
| 20 | a | 160.46 | 0.60555  | YES | YES |
| 21 | a | 183.73 | 0.72674  | YES | YES |
| 22 | a | 202.28 | 0.19418  | YES | YES |
| 23 | a | 217.24 | 1.59049  | YES | YES |
| 24 | a | 246.57 | 1.24502  | YES | YES |
| 25 | a | 268.54 | 0.12494  | YES | YES |
| 26 | a | 284.53 | 0.22753  | YES | YES |
| 27 | a | 344.37 | 6.19449  | YES | YES |
| 28 | a | 378.18 | 1.40902  | YES | YES |
| 29 | a | 401.89 | 0.07019  | YES | YES |
| 30 | a | 410.53 | 2.74233  | YES | YES |
| 31 | a | 412.51 | 0.38710  | YES | YES |
| 32 | a | 437.47 | 1.28361  | YES | YES |
| 33 | a | 451.81 | 0.33644  | YES | YES |
| 34 | a | 461.91 | 10.89574 | YES | YES |
| 35 | a | 474.64 | 1.21843  | YES | YES |
| 36 | a | 489.37 | 4.15812  | YES | YES |
| 37 | a | 499.02 | 12.59916 | YES | YES |
| 38 | a | 507.71 | 2.91113  | YES | YES |
| 39 | a | 523.72 | 0.68396  | YES | YES |
| 40 | a | 536.45 | 21.31995 | YES | YES |
| 41 | a | 544.19 | 10.51342 | YES | YES |
| 42 | a | 587.29 | 45.28376 | YES | YES |
| 43 | a | 601.55 | 8.05846  | YES | YES |
| 44 | a | 605.21 | 3.61664  | YES | YES |
| 45 | a | 610.37 | 16.40323 | YES | YES |
| 46 | a | 618.62 | 32.05822 | YES | YES |
| 47 | a | 629.66 | 5.92647  | YES | YES |
| 48 | a | 650.99 | 6.48357  | YES | YES |
| 49 | a | 662.64 | 77.38872 | YES | YES |
| 50 | a | 683.14 | 75.60527 | YES | YES |

**TS<sub>23ia'</sub>**

SCF Energy (au) BP86/SV(P) -2183.103988116  
 SCF Energy (au) PBE0/def2-TZVPP -2182.684894240  
 SCF Energy (au) PBE0/def2-TZVPP -2182.6918100274 (Toluene Correction)  
 Zero Point Energy (au) 0.2574986  
 Chemical Potential (kJ mol<sup>-1</sup>) 536.55  
 Dispersion Correction (au) PBE0/def2-TZVPP -0.05277314

xyz coordinates

37

|    |            |            |            |
|----|------------|------------|------------|
| Mn | 0.8656508  | 2.1918527  | 0.3154680  |
| C  | 1.1790350  | 2.5549686  | 2.0654266  |
| C  | 2.5879855  | 1.8447707  | 0.0639702  |
| C  | 1.0592617  | 3.9108963  | -0.2271348 |
| O  | 1.1764375  | 5.0000906  | -0.6170753 |
| O  | 3.7169389  | 1.5924075  | -0.1107837 |
| O  | 1.3780395  | 2.7885345  | 3.1888876  |
| C  | -1.8851770 | 1.5606129  | 1.0314934  |
| C  | -3.3749241 | 1.7211766  | 1.2143033  |
| C  | -1.1676374 | 0.3385116  | 1.3637880  |
| C  | 0.1928795  | 0.2976471  | 0.8966920  |
| C  | 0.9769784  | -0.8171162 | 1.3068905  |
| C  | 0.4509880  | -1.8082698 | 2.1384112  |
| C  | -0.9031338 | -1.7728671 | 2.5530957  |
| C  | -1.7117010 | -0.7081467 | 2.1532768  |
| H  | 2.0212614  | -0.8984200 | 0.9639711  |
| H  | 1.0995558  | -2.6375996 | 2.4677812  |
| H  | -1.3097820 | -2.5737732 | 3.1913226  |
| H  | -2.7632831 | -0.6596729 | 2.4818752  |
| O  | -1.2156307 | 2.5215978  | 0.5717577  |
| H  | 0.0508076  | 2.2612256  | -2.5157530 |
| C  | 0.2007315  | 1.7823629  | -1.5430835 |
| C  | 0.2860068  | 0.5846236  | -1.0359600 |
| C  | 0.5162019  | -0.7600306 | -1.6056033 |
| H  | -3.6912993 | 2.7092654  | 0.8251728  |
| H  | -3.6424525 | 1.6592183  | 2.2930281  |
| H  | -3.9340442 | 0.9161822  | 0.6885007  |
| C  | 0.9322564  | -3.2571365 | -2.8686490 |
| C  | 1.8416603  | -2.2050001 | -3.0704459 |
| C  | 1.6339749  | -0.9629319 | -2.4495997 |
| C  | -0.3846345 | -1.8296872 | -1.3973801 |
| C  | -0.1825077 | -3.0636265 | -2.0332442 |
| H  | 1.0923530  | -4.2302003 | -3.3619071 |
| H  | 2.7212031  | -2.3489816 | -3.7198076 |
| H  | 2.3454830  | -0.1362331 | -2.6045609 |
| H  | -1.2567891 | -1.6828597 | -0.7402380 |
| H  | -0.9026940 | -3.8833917 | -1.8738868 |

\$vibrational spectrum

| # | mode | symmetry | wave number | IR intensity | selection rules |       |
|---|------|----------|-------------|--------------|-----------------|-------|
| # |      |          | cm** (-1)   | km/mol       | IR              | RAMAN |
|   | 1    | a        | -289.58     | 0.00000      | YES             | YES   |
|   | 2    |          | 0.00        | 0.00000      | -               | -     |
|   | 3    |          | 0.00        | 0.00000      | -               | -     |
|   | 4    |          | 0.00        | 0.00000      | -               | -     |
|   | 5    |          | 0.00        | 0.00000      | -               | -     |
|   | 6    |          | 0.00        | 0.00000      | -               | -     |
|   | 7    |          | 0.00        | 0.00000      | -               | -     |
|   | 8    | a        | 19.52       | 0.07940      | YES             | YES   |
|   | 9    | a        | 29.50       | 0.44592      | YES             | YES   |
|   | 10   | a        | 47.00       | 0.00881      | YES             | YES   |

|    |   |        |          |     |     |
|----|---|--------|----------|-----|-----|
| 11 | a | 66.99  | 0.70250  | YES | YES |
| 12 | a | 69.94  | 0.36195  | YES | YES |
| 13 | a | 75.16  | 0.35748  | YES | YES |
| 14 | a | 87.37  | 0.16474  | YES | YES |
| 15 | a | 92.36  | 0.09761  | YES | YES |
| 16 | a | 100.95 | 0.18832  | YES | YES |
| 17 | a | 105.08 | 0.60387  | YES | YES |
| 18 | a | 125.50 | 0.05780  | YES | YES |
| 19 | a | 145.83 | 0.68043  | YES | YES |
| 20 | a | 161.43 | 0.37167  | YES | YES |
| 21 | a | 189.20 | 2.75605  | YES | YES |
| 22 | a | 201.91 | 1.88209  | YES | YES |
| 23 | a | 214.20 | 1.99503  | YES | YES |
| 24 | a | 233.76 | 2.14063  | YES | YES |
| 25 | a | 247.68 | 0.55556  | YES | YES |
| 26 | a | 280.54 | 0.32179  | YES | YES |
| 27 | a | 305.53 | 1.16879  | YES | YES |
| 28 | a | 391.57 | 2.59632  | YES | YES |
| 29 | a | 400.96 | 0.00811  | YES | YES |
| 30 | a | 409.44 | 2.07552  | YES | YES |
| 31 | a | 418.83 | 5.94734  | YES | YES |
| 32 | a | 445.08 | 0.94194  | YES | YES |
| 33 | a | 466.52 | 0.52551  | YES | YES |
| 34 | a | 474.78 | 0.62650  | YES | YES |
| 35 | a | 486.70 | 3.71712  | YES | YES |
| 36 | a | 497.96 | 17.15639 | YES | YES |
| 37 | a | 510.90 | 0.65377  | YES | YES |
| 38 | a | 514.70 | 9.50928  | YES | YES |
| 39 | a | 523.80 | 7.85160  | YES | YES |
| 40 | a | 535.03 | 12.63137 | YES | YES |
| 41 | a | 562.79 | 13.26407 | YES | YES |
| 42 | a | 569.97 | 6.56249  | YES | YES |
| 43 | a | 599.46 | 22.92425 | YES | YES |
| 44 | a | 604.08 | 9.15845  | YES | YES |
| 45 | a | 610.41 | 63.96900 | YES | YES |
| 46 | a | 613.73 | 5.51951  | YES | YES |
| 47 | a | 628.85 | 10.60410 | YES | YES |
| 48 | a | 656.49 | 38.14813 | YES | YES |
| 49 | a | 681.82 | 76.06539 | YES | YES |
| 50 | a | 689.44 | 19.04587 | YES | YES |

**TS<sub>23ja</sub>**

|                                            |                                       |
|--------------------------------------------|---------------------------------------|
| SCF Energy (au) BP86/SV(P)                 | -2452.074142234                       |
| SCF Energy (au) PBE0/def2-TZVPP            | -2451.611763009                       |
| SCF Energy (au) PBE0/def2-TZVPP            | -2451.6198030278 (Toluene Correction) |
| Zero Point Energy (au)                     | 0.3426121                             |
| Chemical Potential (kJ mol <sup>-1</sup> ) | 738.90                                |
| Dispersion Correction (au) PBE0/def2-TZVPP | -0.06697983                           |

xyz coordinates

48

|    |            |            |            |
|----|------------|------------|------------|
| Mn | 1.5654786  | 0.9681938  | 0.4627900  |
| C  | 1.9182416  | 1.2711050  | 2.2078398  |
| C  | 3.2854914  | 0.6398468  | 0.1205255  |
| C  | 1.7410987  | 2.7390327  | 0.0539965  |
| O  | 1.8481311  | 3.8736680  | -0.1726503 |
| O  | 4.4094621  | 0.4308376  | -0.1165767 |
| O  | 2.1443005  | 1.4632721  | 3.3334955  |
| C  | -1.1354830 | 0.3230288  | 1.1767272  |
| C  | -2.5924500 | 0.4860401  | 1.4246771  |
| C  | -0.4263610 | -0.8978221 | 1.4068286  |
| C  | 0.9262225  | -0.8932344 | 1.0551879  |
| C  | 1.7359861  | -2.1102219 | 1.3285877  |
| O  | -0.4687028 | 1.3262799  | 0.7545599  |
| C  | 0.4294030  | 1.3443794  | -2.7203335 |
| C  | 1.0947815  | 2.4917352  | -3.2222126 |
| C  | 0.6939823  | 3.0742199  | -4.4328112 |
| C  | -0.3837235 | 2.5396352  | -5.1609371 |
| C  | -1.0597128 | 1.4079526  | -4.6693880 |
| C  | -0.6607253 | 0.8148338  | -3.4650582 |
| H  | 1.9398299  | 2.9201504  | -2.6636380 |
| H  | 1.2293198  | 3.9607478  | -4.8111972 |
| H  | -0.6992564 | 3.0056133  | -6.1089827 |
| H  | -1.9080140 | 0.9816840  | -5.2305998 |
| H  | -1.1914557 | -0.0692529 | -3.0769267 |
| C  | 0.8343937  | 0.6607428  | -1.5140208 |
| C  | 1.0386082  | -0.4801990 | -0.9434658 |
| H  | 1.2698459  | -1.5240326 | -1.1830719 |
| C  | 3.2211616  | -4.4623286 | 1.9036248  |
| C  | 1.9746975  | -4.5548126 | 1.2605153  |
| C  | 1.2370539  | -3.3932483 | 0.9855944  |
| C  | 3.0006889  | -2.0360127 | 1.9592241  |
| C  | 3.7266886  | -3.1994438 | 2.2567531  |
| H  | 3.8001881  | -5.3739688 | 2.1256541  |
| H  | 1.5719437  | -5.5398198 | 0.9715006  |
| H  | 0.2581377  | -3.4736495 | 0.4834480  |
| H  | 3.4100301  | -1.0544150 | 2.2403214  |
| H  | 4.7022422  | -3.1159529 | 2.7634979  |
| C  | -5.3471196 | 0.8537170  | 1.9156071  |
| C  | -4.8631252 | -0.4103499 | 1.5360898  |
| C  | -3.4918806 | -0.5979408 | 1.3053365  |
| C  | -3.0919689 | 1.7596975  | 1.7845470  |
| C  | -4.4577647 | 1.9373832  | 2.0431648  |
| H  | -6.4229519 | 0.9971777  | 2.1104698  |
| H  | -5.5601838 | -1.2565457 | 1.4170325  |
| H  | -3.1189453 | -1.5882096 | 0.9971250  |
| H  | -2.3856525 | 2.5997060  | 1.8729524  |
| H  | -4.8346486 | 2.9278332  | 2.3479318  |
| H  | -0.9072833 | -1.7670527 | 1.8862643  |

\$vibrational spectrum

| #  | mode | symmetry | wave number<br>cm**(-1) | IR intensity<br>km/mol | selection rules |       |
|----|------|----------|-------------------------|------------------------|-----------------|-------|
| #  |      |          |                         |                        | IR              | RAMAN |
| 1  |      | a        | -180.13                 | 0.00000                | YES             | YES   |
| 2  |      |          | 0.00                    | 0.00000                | -               | -     |
| 3  |      |          | 0.00                    | 0.00000                | -               | -     |
| 4  |      |          | 0.00                    | 0.00000                | -               | -     |
| 5  |      |          | 0.00                    | 0.00000                | -               | -     |
| 6  |      |          | 0.00                    | 0.00000                | -               | -     |
| 7  |      |          | 0.00                    | 0.00000                | -               | -     |
| 8  |      | a        | 16.16                   | 0.08999                | YES             | YES   |
| 9  |      | a        | 20.23                   | 0.17454                | YES             | YES   |
| 10 |      | a        | 34.71                   | 0.06401                | YES             | YES   |
| 11 |      | a        | 37.61                   | 0.19479                | YES             | YES   |
| 12 |      | a        | 43.85                   | 0.24760                | YES             | YES   |
| 13 |      | a        | 51.29                   | 0.13596                | YES             | YES   |
| 14 |      | a        | 54.50                   | 0.27276                | YES             | YES   |
| 15 |      | a        | 63.64                   | 0.23335                | YES             | YES   |
| 16 |      | a        | 74.41                   | 0.09767                | YES             | YES   |
| 17 |      | a        | 93.89                   | 0.26720                | YES             | YES   |
| 18 |      | a        | 99.92                   | 0.26287                | YES             | YES   |
| 19 |      | a        | 102.96                  | 0.22256                | YES             | YES   |
| 20 |      | a        | 105.64                  | 0.21123                | YES             | YES   |
| 21 |      | a        | 116.39                  | 0.20491                | YES             | YES   |
| 22 |      | a        | 143.20                  | 0.60293                | YES             | YES   |
| 23 |      | a        | 149.93                  | 0.16503                | YES             | YES   |
| 24 |      | a        | 190.48                  | 1.23144                | YES             | YES   |
| 25 |      | a        | 205.11                  | 1.14525                | YES             | YES   |
| 26 |      | a        | 214.53                  | 0.46048                | YES             | YES   |
| 27 |      | a        | 220.33                  | 0.23064                | YES             | YES   |
| 28 |      | a        | 237.52                  | 0.32706                | YES             | YES   |
| 29 |      | a        | 247.55                  | 0.52677                | YES             | YES   |
| 30 |      | a        | 282.57                  | 2.82391                | YES             | YES   |
| 31 |      | a        | 341.14                  | 1.83436                | YES             | YES   |
| 32 |      | a        | 353.75                  | 3.35426                | YES             | YES   |
| 33 |      | a        | 366.36                  | 8.42762                | YES             | YES   |
| 34 |      | a        | 401.05                  | 0.75597                | YES             | YES   |
| 35 |      | a        | 401.37                  | 0.17593                | YES             | YES   |
| 36 |      | a        | 404.09                  | 1.14187                | YES             | YES   |
| 37 |      | a        | 421.75                  | 0.55163                | YES             | YES   |
| 38 |      | a        | 438.05                  | 4.88263                | YES             | YES   |
| 39 |      | a        | 445.64                  | 5.18937                | YES             | YES   |
| 40 |      | a        | 467.10                  | 3.82912                | YES             | YES   |
| 41 |      | a        | 469.55                  | 9.05303                | YES             | YES   |
| 42 |      | a        | 492.57                  | 4.87405                | YES             | YES   |
| 43 |      | a        | 495.94                  | 4.92155                | YES             | YES   |
| 44 |      | a        | 498.59                  | 9.00082                | YES             | YES   |
| 45 |      | a        | 516.90                  | 5.21897                | YES             | YES   |
| 46 |      | a        | 522.34                  | 2.90990                | YES             | YES   |
| 47 |      | a        | 539.29                  | 7.89970                | YES             | YES   |
| 48 |      | a        | 550.81                  | 20.25726               | YES             | YES   |
| 49 |      | a        | 556.18                  | 47.74073               | YES             | YES   |
| 50 |      | a        | 584.71                  | 36.46291               | YES             | YES   |

**TS<sub>38ia</sub>**

SCF Energy (au) BP86/SV(P) -2183.131539912  
 SCF Energy (au) PBE0/def2-TZVPP -2182.721878063  
 SCF Energy (au) PBE0/def2-TZVPP -2182.7291178777 (Toluene Correction)  
 Zero Point Energy (au) 0.2598847  
 Chemical Potential (kJ mol<sup>-1</sup>) 548.92  
 Dispersion Correction (au) PBE0/def2-TZVPP -0.05353197

## xyz coordinates

37

|    |            |            |            |
|----|------------|------------|------------|
| C  | 1.3367351  | -0.3768756 | 2.2988397  |
| C  | -0.8696697 | 0.8718326  | 2.5792574  |
| C  | 0.2856535  | 0.5555105  | -0.1853000 |
| C  | -0.8282425 | -1.6478829 | 2.9806592  |
| C  | 1.2519233  | -1.5778408 | -0.5630382 |
| C  | 2.2661993  | -2.5523916 | -0.6927707 |
| C  | 0.7030816  | -4.2683414 | 0.1152815  |
| C  | -0.3271217 | -3.3227472 | 0.2125609  |
| C  | -0.0654066 | -1.9849484 | -0.1596621 |
| C  | -1.1360361 | -0.9068470 | -0.3388982 |
| C  | -1.5758540 | -0.6336499 | -1.7822888 |
| Mn | -0.3279993 | -0.5396906 | 1.6508554  |
| O  | -2.0534784 | -0.8175555 | 0.5732889  |
| O  | 2.4163054  | -0.2735892 | 2.7286415  |
| O  | -1.2253325 | 1.7938260  | 3.1976814  |
| C  | 1.3383776  | -0.1411305 | -0.7477564 |
| O  | -1.1596605 | -2.3668982 | 3.8350984  |
| C  | 1.9817374  | -3.8823686 | -0.3520192 |
| H  | 2.1689385  | 0.3057951  | -1.3249510 |
| C  | -0.0172476 | 1.9784906  | -0.3980815 |
| C  | -0.6588862 | 4.7126596  | -0.8344551 |
| C  | -1.6449917 | 3.8175246  | -0.3849215 |
| C  | -1.3271176 | 2.4705144  | -0.1582523 |
| C  | 0.9650262  | 2.8969337  | -0.8540831 |
| C  | 0.6494950  | 4.2465958  | -1.0614716 |
| H  | -0.9056341 | 5.7744510  | -0.9996448 |
| H  | -2.6712222 | 4.1733747  | -0.1962435 |
| H  | -2.1011877 | 1.7750955  | 0.2048468  |
| H  | 1.9976462  | 2.5529194  | -1.0266605 |
| H  | 1.4329602  | 4.9443609  | -1.4014742 |
| H  | -1.3413772 | -3.6078647 | 0.5360664  |
| H  | 0.5161972  | -5.3184823 | 0.3920617  |
| H  | 2.7777451  | -4.6417863 | -0.4299211 |
| H  | 3.2777694  | -2.2619577 | -1.0205504 |
| H  | -0.7404145 | -0.7332922 | -2.5036776 |
| H  | -2.0291270 | 0.3746046  | -1.8699356 |
| H  | -2.3597839 | -1.3883484 | -2.0190815 |

## \$vibrational spectrum

| # | mode | symmetry | wave number | IR intensity | selection rules |       |
|---|------|----------|-------------|--------------|-----------------|-------|
| # |      |          | cm**(-1)    | km/mol       | IR              | RAMAN |
|   | 1    | a        | -178.15     | 0.00000      | YES             | YES   |
|   | 2    |          | 0.00        | 0.00000      | -               | -     |
|   | 3    |          | 0.00        | 0.00000      | -               | -     |
|   | 4    |          | 0.00        | 0.00000      | -               | -     |
|   | 5    |          | 0.00        | 0.00000      | -               | -     |
|   | 6    |          | 0.00        | 0.00000      | -               | -     |
|   | 7    |          | 0.00        | 0.00000      | -               | -     |
|   | 8    | a        | 38.07       | 0.17468      | YES             | YES   |
|   | 9    | a        | 42.16       | 0.34856      | YES             | YES   |
|   | 10   | a        | 57.65       | 0.64808      | YES             | YES   |
|   | 11   | a        | 69.07       | 0.05984      | YES             | YES   |

|    |   |        |          |     |     |
|----|---|--------|----------|-----|-----|
| 12 | a | 79.69  | 1.20659  | YES | YES |
| 13 | a | 85.09  | 0.07459  | YES | YES |
| 14 | a | 91.20  | 0.11329  | YES | YES |
| 15 | a | 101.05 | 0.11238  | YES | YES |
| 16 | a | 108.83 | 0.07859  | YES | YES |
| 17 | a | 109.28 | 0.33871  | YES | YES |
| 18 | a | 129.11 | 1.29873  | YES | YES |
| 19 | a | 172.76 | 1.55207  | YES | YES |
| 20 | a | 197.82 | 1.60561  | YES | YES |
| 21 | a | 218.20 | 1.84289  | YES | YES |
| 22 | a | 229.25 | 1.86660  | YES | YES |
| 23 | a | 250.83 | 0.90614  | YES | YES |
| 24 | a | 261.45 | 5.14381  | YES | YES |
| 25 | a | 277.68 | 0.84444  | YES | YES |
| 26 | a | 299.35 | 0.12607  | YES | YES |
| 27 | a | 346.64 | 4.71924  | YES | YES |
| 28 | a | 365.64 | 21.12433 | YES | YES |
| 29 | a | 405.32 | 0.81981  | YES | YES |
| 30 | a | 442.72 | 2.88639  | YES | YES |
| 31 | a | 448.97 | 1.12164  | YES | YES |
| 32 | a | 463.59 | 3.13786  | YES | YES |
| 33 | a | 472.79 | 2.09847  | YES | YES |
| 34 | a | 486.71 | 13.64170 | YES | YES |
| 35 | a | 489.97 | 4.34087  | YES | YES |
| 36 | a | 498.19 | 5.76372  | YES | YES |
| 37 | a | 518.61 | 14.10605 | YES | YES |
| 38 | a | 526.22 | 1.99394  | YES | YES |
| 39 | a | 532.54 | 1.56273  | YES | YES |
| 40 | a | 538.83 | 2.68195  | YES | YES |
| 41 | a | 545.65 | 5.39873  | YES | YES |
| 42 | a | 578.06 | 50.23447 | YES | YES |
| 43 | a | 605.11 | 1.59629  | YES | YES |
| 44 | a | 612.32 | 2.01782  | YES | YES |
| 45 | a | 625.64 | 19.88850 | YES | YES |
| 46 | a | 631.86 | 24.17884 | YES | YES |
| 47 | a | 640.70 | 6.88353  | YES | YES |
| 48 | a | 687.72 | 43.96053 | YES | YES |
| 49 | a | 697.76 | 24.66806 | YES | YES |
| 50 | a | 707.48 | 1.42323  | YES | YES |



**TS<sub>38ja</sub>**

|                                            |                                       |
|--------------------------------------------|---------------------------------------|
| SCF Energy (au) BP86/SV(P)                 | -2452.085970536                       |
| SCF Energy (au) PBE0/def2-TZVPP            | -2451.630064256                       |
| SCF Energy (au) PBE0/def2-TZVPP            | -2451.6393433949 (Toluene Correction) |
| Zero Point Energy (au)                     | 0.3438944                             |
| Chemical Potential (kJ mol <sup>-1</sup> ) | 742.05                                |
| Dispersion Correction (au) PBE0/def2-TZVPP | -0.07029183                           |

xyz coordinates

48

|    |            |            |            |
|----|------------|------------|------------|
| C  | 1.4459651  | -0.1758419 | 2.8322908  |
| C  | -0.8719835 | 0.8033845  | 3.3521899  |
| C  | 0.0125768  | 0.8884238  | 0.4443620  |
| C  | -0.5083544 | -1.7779318 | 3.3370157  |
| C  | 1.0132788  | -1.2451803 | 0.1905398  |
| C  | 2.1795258  | -2.1580859 | 0.1205537  |
| C  | -0.3067939 | -1.6681079 | 0.4295187  |
| C  | -1.4034456 | -0.6318798 | 0.2980345  |
| C  | -2.0187606 | -0.3064184 | -1.0455662 |
| Mn | -0.2219443 | -0.4141605 | 2.2012076  |
| O  | -2.1573556 | -0.5843903 | 1.3513091  |
| O  | 2.5026577  | -0.0181497 | 3.3015286  |
| O  | -1.3089156 | 1.5830339  | 4.0958950  |
| C  | 1.0950577  | 0.1951911  | -0.0519171 |
| O  | -0.7006179 | -2.6852305 | 4.0434619  |
| H  | 1.9811696  | 0.6399284  | -0.5426852 |
| C  | -0.2991287 | 2.3090379  | 0.2745308  |
| C  | -0.9605832 | 5.0546709  | -0.0279566 |
| C  | -1.8643864 | 4.1740186  | 0.5920341  |
| C  | -1.5362569 | 2.8195546  | 0.7454660  |
| C  | 0.5953798  | 3.2118961  | -0.3598140 |
| C  | 0.2720649  | 4.5675809  | -0.5018172 |
| H  | -1.2138114 | 6.1218979  | -0.1407718 |
| H  | -2.8323003 | 4.5476008  | 0.9648278  |
| H  | -2.2417561 | 2.1306412  | 1.2353915  |
| H  | 1.5655869  | 2.8492619  | -0.7365969 |
| H  | 0.9880235  | 5.2532203  | -0.9851804 |
| C  | 4.3876931  | -3.9295352 | -0.0631820 |
| C  | 4.4216323  | -2.6878733 | -0.7187161 |
| C  | 3.3334881  | -1.8068533 | -0.6202468 |
| C  | 2.1615645  | -3.4136922 | 0.7770749  |
| C  | 3.2539196  | -4.2864338 | 0.6895042  |
| H  | 5.2462816  | -4.6173137 | -0.1331958 |
| H  | 5.3049295  | -2.3975818 | -1.3107729 |
| H  | 3.3789063  | -0.8420686 | -1.1485920 |
| H  | 1.2920379  | -3.6977317 | 1.3904486  |
| H  | 3.2228163  | -5.2524159 | 1.2194816  |
| C  | -3.3354897 | 0.2099527  | -3.4882376 |
| C  | -2.0171691 | -0.2836324 | -3.4855670 |
| C  | -1.3643536 | -0.5440095 | -2.2721703 |
| C  | -3.3403718 | 0.1856946  | -1.0537263 |
| C  | -3.9954496 | 0.4391063  | -2.2694879 |
| H  | -3.8483526 | 0.4108975  | -4.4436166 |
| H  | -1.4963679 | -0.4734897 | -4.4387979 |
| H  | -0.3342230 | -0.9371152 | -2.2802273 |
| H  | -3.8489404 | 0.3411595  | -0.0895448 |
| H  | -5.0318163 | 0.8173070  | -2.2638959 |
| H  | -0.5956271 | -2.7183371 | 0.5856160  |

\$vibrational spectrum

| #  | mode | symmetry | wave number<br>cm**(-1) | IR intensity<br>km/mol | selection rules |       |
|----|------|----------|-------------------------|------------------------|-----------------|-------|
| #  |      |          |                         |                        | IR              | RAMAN |
| 1  |      | a        | -257.50                 | 0.00000                | YES             | YES   |
| 2  |      |          | 0.00                    | 0.00000                | -               | -     |
| 3  |      |          | 0.00                    | 0.00000                | -               | -     |
| 4  |      |          | 0.00                    | 0.00000                | -               | -     |
| 5  |      |          | 0.00                    | 0.00000                | -               | -     |
| 6  |      |          | 0.00                    | 0.00000                | -               | -     |
| 7  |      |          | 0.00                    | 0.00000                | -               | -     |
| 8  |      | a        | 16.16                   | 0.35618                | YES             | YES   |
| 9  |      | a        | 19.51                   | 0.10998                | YES             | YES   |
| 10 |      | a        | 30.74                   | 0.85372                | YES             | YES   |
| 11 |      | a        | 37.52                   | 0.01350                | YES             | YES   |
| 12 |      | a        | 40.58                   | 0.13918                | YES             | YES   |
| 13 |      | a        | 47.33                   | 0.01430                | YES             | YES   |
| 14 |      | a        | 51.11                   | 0.28303                | YES             | YES   |
| 15 |      | a        | 59.59                   | 0.80674                | YES             | YES   |
| 16 |      | a        | 74.06                   | 0.79660                | YES             | YES   |
| 17 |      | a        | 84.46                   | 0.71821                | YES             | YES   |
| 18 |      | a        | 89.28                   | 0.09853                | YES             | YES   |
| 19 |      | a        | 100.80                  | 0.74385                | YES             | YES   |
| 20 |      | a        | 110.29                  | 1.42942                | YES             | YES   |
| 21 |      | a        | 124.54                  | 0.19616                | YES             | YES   |
| 22 |      | a        | 133.27                  | 0.44369                | YES             | YES   |
| 23 |      | a        | 157.79                  | 2.33843                | YES             | YES   |
| 24 |      | a        | 187.55                  | 0.58258                | YES             | YES   |
| 25 |      | a        | 203.50                  | 1.02218                | YES             | YES   |
| 26 |      | a        | 218.94                  | 3.89951                | YES             | YES   |
| 27 |      | a        | 235.58                  | 1.10036                | YES             | YES   |
| 28 |      | a        | 242.37                  | 0.84239                | YES             | YES   |
| 29 |      | a        | 249.53                  | 0.58950                | YES             | YES   |
| 30 |      | a        | 290.62                  | 8.45380                | YES             | YES   |
| 31 |      | a        | 355.98                  | 18.12758               | YES             | YES   |
| 32 |      | a        | 373.78                  | 1.88651                | YES             | YES   |
| 33 |      | a        | 396.89                  | 1.42140                | YES             | YES   |
| 34 |      | a        | 400.74                  | 0.64740                | YES             | YES   |
| 35 |      | a        | 402.24                  | 0.55560                | YES             | YES   |
| 36 |      | a        | 416.32                  | 11.16342               | YES             | YES   |
| 37 |      | a        | 438.96                  | 1.67739                | YES             | YES   |
| 38 |      | a        | 456.34                  | 7.67132                | YES             | YES   |
| 39 |      | a        | 462.49                  | 3.16918                | YES             | YES   |
| 40 |      | a        | 473.97                  | 8.00078                | YES             | YES   |
| 41 |      | a        | 478.28                  | 0.19856                | YES             | YES   |
| 42 |      | a        | 480.96                  | 1.70836                | YES             | YES   |
| 43 |      | a        | 494.62                  | 8.40481                | YES             | YES   |
| 44 |      | a        | 507.88                  | 11.33733               | YES             | YES   |
| 45 |      | a        | 517.95                  | 4.88110                | YES             | YES   |
| 46 |      | a        | 528.96                  | 16.19087               | YES             | YES   |
| 47 |      | a        | 541.68                  | 2.52103                | YES             | YES   |
| 48 |      | a        | 576.51                  | 14.87999               | YES             | YES   |
| 49 |      | a        | 588.03                  | 27.43969               | YES             | YES   |
| 50 |      | a        | 607.72                  | 15.80706               | YES             | YES   |

**TS<sub>39ia</sub>**

SCF Energy (au) BP86/SV(P) -2183.125430263  
SCF Energy (au) PBE0/def2-TZVPP -2182.704202665  
SCF Energy (au) PBE0/def2-TZVPP -2182.7106225495 (Toluene Correction)  
Zero Point Energy (au) 0.2592413  
Chemical Potential (kJ mol<sup>-1</sup>) 544.22  
Dispersion Correction (au) PBE0/def2-TZVPP -0.04988049

## xyz coordinates

37  
C 1.6215828 0.0130222 2.8637253  
C -0.5552919 1.2926508 2.8384885  
C 0.3174606 0.8443706 0.1505579  
C -0.5744828 -1.3750881 3.0075668  
C 0.7261198 -1.6256458 0.3393932  
C 1.7321269 -2.6532331 0.5664832  
C 0.2907708 -4.3516046 -0.4519661  
C -0.7080140 -3.4292694 -0.6772707  
C -0.5704676 -2.0679884 -0.2341211  
C -1.5464973 -1.0762966 -0.3232095  
C -2.7473448 -1.0344039 -1.2212595  
Mn 0.1193950 -0.0917515 1.9197951  
O -1.3230132 0.0275928 0.4074424  
O 2.6326727 0.0755906 3.4481464  
O -0.9747757 2.1891404 3.4576197  
C 1.1731735 -0.2558642 0.0899197  
O -1.0479384 -2.1858525 3.6955779  
C 1.5161086 -3.9592029 0.1995257  
H 2.2538640 -0.0815612 -0.0572638  
C 0.3137643 2.1154790 -0.5445059  
H -1.6541747 -3.7437835 -1.1471547  
H 0.1515968 -5.4016114 -0.7567116  
H 2.2932074 -4.7178198 0.3894030  
H 2.6884546 -2.3521242 1.0258805  
H -2.8894473 -1.9851829 -1.7739075  
H -2.6294363 -0.2159190 -1.9692374  
H -3.6716583 -0.8108671 -0.6431154  
C 0.3086756 4.5642397 -1.9674185  
C 0.8512904 3.4089457 -2.5600222  
C 0.8486286 2.1954004 -1.8602233  
C -0.2351322 3.2887501 0.0356064  
C -0.2339798 4.4983769 -0.6702443  
H 0.3059966 5.5188076 -2.5194580  
H 1.2749335 3.4550747 -3.5766716  
H 1.2615609 1.2851469 -2.3259539  
H -0.6594449 3.2401770 1.0493161  
H -0.6602843 5.4023044 -0.2047327

## \$vibrational spectrum

| #  | mode | symmetry | wave number           | IR intensity | selection rules |       |
|----|------|----------|-----------------------|--------------|-----------------|-------|
| #  |      |          | cm <sup>**</sup> (-1) | km/mol       | IR              | RAMAN |
| 1  |      | a        | -313.32               | 0.00000      | YES             | YES   |
| 2  |      |          | 0.00                  | 0.00000      | -               | -     |
| 3  |      |          | 0.00                  | 0.00000      | -               | -     |
| 4  |      |          | 0.00                  | 0.00000      | -               | -     |
| 5  |      |          | 0.00                  | 0.00000      | -               | -     |
| 6  |      |          | 0.00                  | 0.00000      | -               | -     |
| 7  |      |          | 0.00                  | 0.00000      | -               | -     |
| 8  |      | a        | 31.63                 | 0.03949      | YES             | YES   |
| 9  |      | a        | 40.30                 | 0.01775      | YES             | YES   |
| 10 |      | a        | 53.45                 | 0.53751      | YES             | YES   |
| 11 |      | a        | 60.98                 | 0.12144      | YES             | YES   |
| 12 |      | a        | 69.36                 | 0.04757      | YES             | YES   |

|    |   |        |          |     |     |
|----|---|--------|----------|-----|-----|
| 13 | a | 80.92  | 0.16401  | YES | YES |
| 14 | a | 88.84  | 0.18539  | YES | YES |
| 15 | a | 91.39  | 0.29083  | YES | YES |
| 16 | a | 98.17  | 0.47781  | YES | YES |
| 17 | a | 104.25 | 0.53446  | YES | YES |
| 18 | a | 122.27 | 0.27990  | YES | YES |
| 19 | a | 147.04 | 0.95015  | YES | YES |
| 20 | a | 154.86 | 1.55796  | YES | YES |
| 21 | a | 192.89 | 0.67278  | YES | YES |
| 22 | a | 223.70 | 0.31201  | YES | YES |
| 23 | a | 235.13 | 0.54397  | YES | YES |
| 24 | a | 257.58 | 0.44732  | YES | YES |
| 25 | a | 279.00 | 0.69986  | YES | YES |
| 26 | a | 318.53 | 1.92914  | YES | YES |
| 27 | a | 387.67 | 4.46802  | YES | YES |
| 28 | a | 403.37 | 0.08995  | YES | YES |
| 29 | a | 417.51 | 2.41069  | YES | YES |
| 30 | a | 432.74 | 1.95993  | YES | YES |
| 31 | a | 441.60 | 2.11914  | YES | YES |
| 32 | a | 461.74 | 0.87129  | YES | YES |
| 33 | a | 477.70 | 3.83105  | YES | YES |
| 34 | a | 478.89 | 0.99679  | YES | YES |
| 35 | a | 482.93 | 1.29028  | YES | YES |
| 36 | a | 501.38 | 0.56334  | YES | YES |
| 37 | a | 510.65 | 3.16652  | YES | YES |
| 38 | a | 520.78 | 7.08188  | YES | YES |
| 39 | a | 535.43 | 14.46453 | YES | YES |
| 40 | a | 542.00 | 5.87021  | YES | YES |
| 41 | a | 566.54 | 4.99136  | YES | YES |
| 42 | a | 581.36 | 9.04895  | YES | YES |
| 43 | a | 603.70 | 18.18185 | YES | YES |
| 44 | a | 614.09 | 33.72873 | YES | YES |
| 45 | a | 631.46 | 6.20273  | YES | YES |
| 46 | a | 642.41 | 31.94297 | YES | YES |
| 47 | a | 657.03 | 5.78668  | YES | YES |
| 48 | a | 685.30 | 47.75021 | YES | YES |
| 49 | a | 688.80 | 33.16830 | YES | YES |
| 50 | a | 701.59 | 14.32620 | YES | YES |

**TS<sub>39ja</sub>**

|                                            |                                       |
|--------------------------------------------|---------------------------------------|
| SCF Energy (au) BP86/SV(P)                 | -2452.101612798                       |
| SCF Energy (au) PBE0/def2-TZVPP            | -2451.637427819                       |
| SCF Energy (au) PBE0/def2-TZVPP            | -2451.6455080397 (Toluene Correction) |
| Zero Point Energy (au)                     | 0.3446137                             |
| Chemical Potential (kJ mol <sup>-1</sup> ) | 746.48                                |
| Dispersion Correction (au) PBE0/def2-TZVPP | -0.06671155                           |

xyz coordinates

48

|    |            |            |            |
|----|------------|------------|------------|
| C  | 1.6911518  | 0.6228639  | 2.9599087  |
| C  | -0.5381033 | 1.8319302  | 2.8699088  |
| C  | 0.5156193  | 1.3664366  | 0.2758119  |
| C  | -0.4804033 | -0.7971369 | 3.1531878  |
| C  | 0.8488824  | -1.1533185 | 0.4898860  |
| C  | 1.9238833  | -2.1593889 | 0.7807363  |
| C  | -0.4299699 | -1.6306059 | -0.0101577 |
| C  | -1.4614591 | -0.7019179 | -0.1204781 |
| C  | -2.6568288 | -0.7785329 | -0.9969108 |
| Mn | 0.1931996  | 0.4441162  | 2.0089345  |
| O  | -1.3093976 | 0.4176004  | 0.5715432  |
| O  | 2.6893899  | 0.7487136  | 3.5529774  |
| O  | -1.0018127 | 2.7373071  | 3.4424823  |
| C  | 1.2831257  | 0.2088211  | 0.1935954  |
| O  | -0.9329596 | -1.5831127 | 3.8847944  |
| H  | 2.3746248  | 0.3488222  | 0.0759198  |
| C  | 0.5527362  | 2.6114123  | -0.4457787 |
| C  | -4.9714533 | -0.8042816 | -2.6347098 |
| C  | -4.0882095 | -1.8996863 | -2.6367533 |
| C  | -2.9367838 | -1.8859868 | -1.8347872 |
| C  | -3.5595053 | 0.3131106  | -0.9985137 |
| C  | -4.6981174 | 0.3043616  | -1.8148038 |
| H  | -5.8716749 | -0.8147227 | -3.2716781 |
| H  | -4.2965941 | -2.7715272 | -3.2790539 |
| H  | -2.2505973 | -2.7475411 | -1.8679982 |
| H  | -3.3418301 | 1.1706181  | -0.3448872 |
| H  | -5.3818132 | 1.1696513  | -1.8054271 |
| H  | -0.4897308 | -2.6480544 | -0.4272459 |
| C  | 0.6920922  | 5.0397000  | -1.8938761 |
| C  | 0.9948020  | 3.8226459  | -2.5346432 |
| C  | 0.9269590  | 2.6209065  | -1.8209363 |
| C  | 0.2278337  | 3.8473862  | 0.1774812  |
| C  | 0.3075455  | 5.0470284  | -0.5391237 |
| H  | 0.7528175  | 5.9872565  | -2.4544869 |
| H  | 1.2854998  | 3.8151227  | -3.5979841 |
| H  | 1.1568459  | 1.6635327  | -2.3166701 |
| H  | -0.0799994 | 3.8505724  | 1.2334426  |
| H  | 0.0669994  | 5.9995647  | -0.0392820 |
| C  | 3.9630695  | -4.0219373 | 1.4494328  |
| C  | 4.2023586  | -3.0250814 | 0.4899196  |
| C  | 3.1928921  | -2.1067782 | 0.1579381  |
| C  | 1.6877952  | -3.1905233 | 1.7206998  |
| C  | 2.6976743  | -4.1047987 | 2.0573633  |
| H  | 4.7601895  | -4.7329263 | 1.7225311  |
| H  | 5.1837171  | -2.9583326 | -0.0085284 |
| H  | 3.3961008  | -1.3491768 | -0.6167166 |
| H  | 0.7101998  | -3.2455799 | 2.2256543  |
| H  | 2.4992385  | -4.8785330 | 2.8172817  |

\$vibrational spectrum

| #  | mode | symmetry | wave number<br>cm**(-1) | IR intensity<br>km/mol | selection rules |       |
|----|------|----------|-------------------------|------------------------|-----------------|-------|
| #  |      |          |                         |                        | IR              | RAMAN |
| 1  |      | a        | -101.84                 | 0.00000                | YES             | YES   |
| 2  |      |          | 0.00                    | 0.00000                | -               | -     |
| 3  |      |          | 0.00                    | 0.00000                | -               | -     |
| 4  |      |          | 0.00                    | 0.00000                | -               | -     |
| 5  |      |          | 0.00                    | 0.00000                | -               | -     |
| 6  |      |          | 0.00                    | 0.00000                | -               | -     |
| 7  |      |          | 0.00                    | 0.00000                | -               | -     |
| 8  |      | a        | 19.82                   | 0.04668                | YES             | YES   |
| 9  |      | a        | 26.78                   | 0.15666                | YES             | YES   |
| 10 |      | a        | 31.80                   | 0.37669                | YES             | YES   |
| 11 |      | a        | 40.20                   | 0.20557                | YES             | YES   |
| 12 |      | a        | 43.70                   | 0.03615                | YES             | YES   |
| 13 |      | a        | 47.80                   | 0.24022                | YES             | YES   |
| 14 |      | a        | 53.12                   | 0.20842                | YES             | YES   |
| 15 |      | a        | 58.20                   | 0.16989                | YES             | YES   |
| 16 |      | a        | 76.82                   | 0.14507                | YES             | YES   |
| 17 |      | a        | 88.16                   | 0.32927                | YES             | YES   |
| 18 |      | a        | 92.55                   | 0.19181                | YES             | YES   |
| 19 |      | a        | 101.18                  | 0.19223                | YES             | YES   |
| 20 |      | a        | 115.84                  | 0.51378                | YES             | YES   |
| 21 |      | a        | 134.32                  | 0.28560                | YES             | YES   |
| 22 |      | a        | 142.23                  | 0.83050                | YES             | YES   |
| 23 |      | a        | 169.68                  | 0.93431                | YES             | YES   |
| 24 |      | a        | 186.56                  | 0.09386                | YES             | YES   |
| 25 |      | a        | 206.28                  | 1.66894                | YES             | YES   |
| 26 |      | a        | 229.73                  | 0.47084                | YES             | YES   |
| 27 |      | a        | 237.12                  | 0.49147                | YES             | YES   |
| 28 |      | a        | 250.38                  | 1.77895                | YES             | YES   |
| 29 |      | a        | 261.02                  | 3.38600                | YES             | YES   |
| 30 |      | a        | 304.35                  | 1.70317                | YES             | YES   |
| 31 |      | a        | 353.95                  | 5.54405                | YES             | YES   |
| 32 |      | a        | 390.73                  | 6.44978                | YES             | YES   |
| 33 |      | a        | 400.70                  | 0.74591                | YES             | YES   |
| 34 |      | a        | 402.44                  | 0.39983                | YES             | YES   |
| 35 |      | a        | 403.13                  | 0.39119                | YES             | YES   |
| 36 |      | a        | 432.59                  | 2.42700                | YES             | YES   |
| 37 |      | a        | 445.95                  | 6.51090                | YES             | YES   |
| 38 |      | a        | 453.39                  | 3.00818                | YES             | YES   |
| 39 |      | a        | 469.58                  | 1.35279                | YES             | YES   |
| 40 |      | a        | 480.02                  | 0.97809                | YES             | YES   |
| 41 |      | a        | 484.42                  | 0.28655                | YES             | YES   |
| 42 |      | a        | 491.23                  | 0.85186                | YES             | YES   |
| 43 |      | a        | 510.47                  | 5.91320                | YES             | YES   |
| 44 |      | a        | 521.15                  | 4.56488                | YES             | YES   |
| 45 |      | a        | 532.73                  | 7.72744                | YES             | YES   |
| 46 |      | a        | 544.33                  | 11.44481               | YES             | YES   |
| 47 |      | a        | 556.94                  | 15.98299               | YES             | YES   |
| 48 |      | a        | 572.11                  | 11.88796               | YES             | YES   |
| 49 |      | a        | 592.99                  | 11.20011               | YES             | YES   |
| 50 |      | a        | 610.97                  | 1.19647                | YES             | YES   |
